# Supplementary material for: Mining metabolites: extracting the yeast metabolome from the literature
Source: PubMed Central journal article supplement — Metabolomics. 2010 Oct 31;7(1):94–101. doi: 10.1007/s11306-010-0251-6 (PMC3111869; doi:10.1007/s11306-010-0251-6), 2010-10-31

**Name: 2-methylisocitrate**

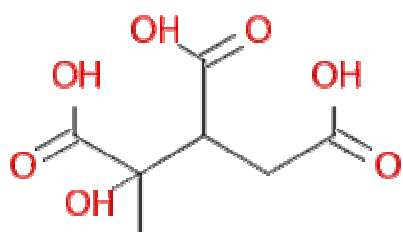

498

Chiral

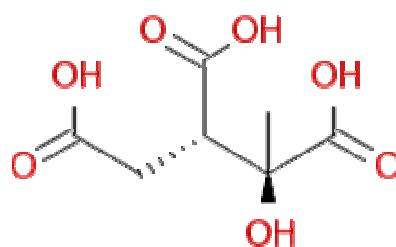

4573561

**Name: Galactose-1-phosphate**

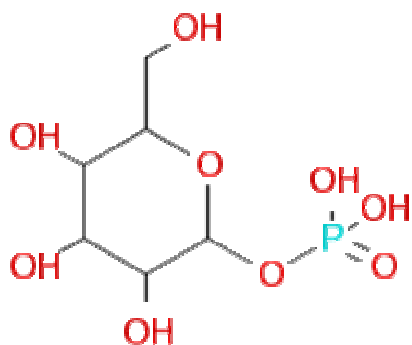

453

Chiral

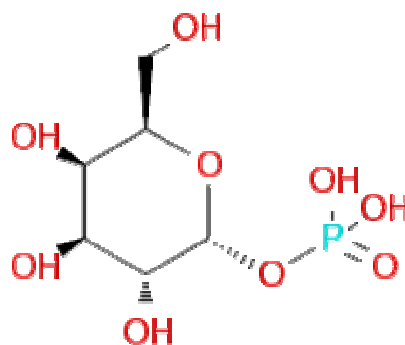

110443

**Name: L-azetidine-2-carboxylic acid**

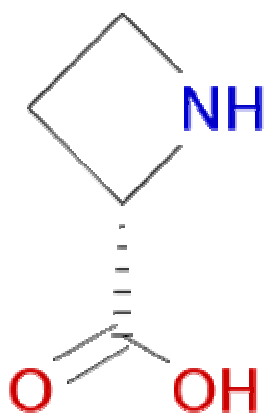

15628

Chiral

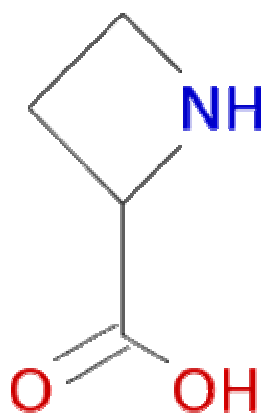

16360

**Name: l-azetidine-2-carboxylic acid**

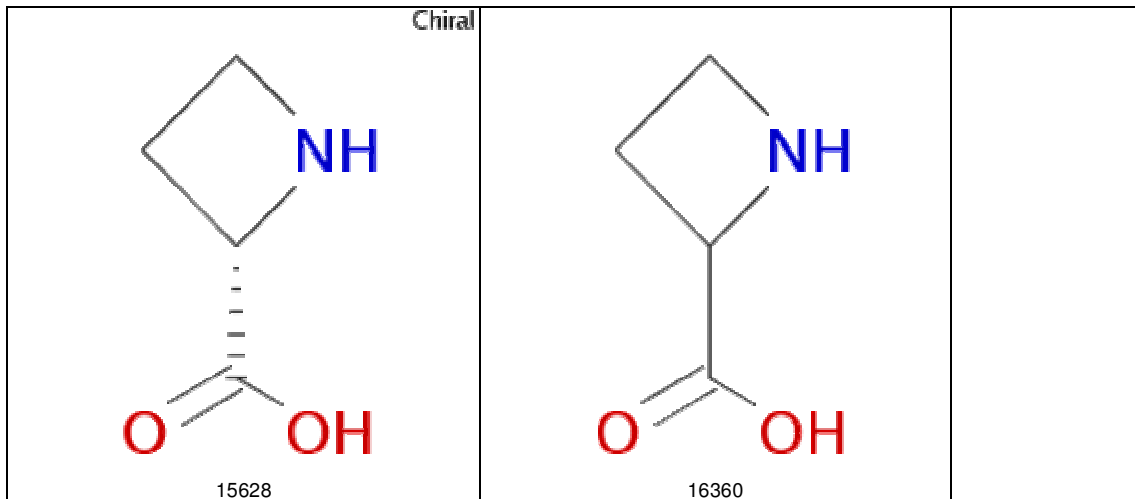

**Name: L-Azetidine-2-carboxylic acid**

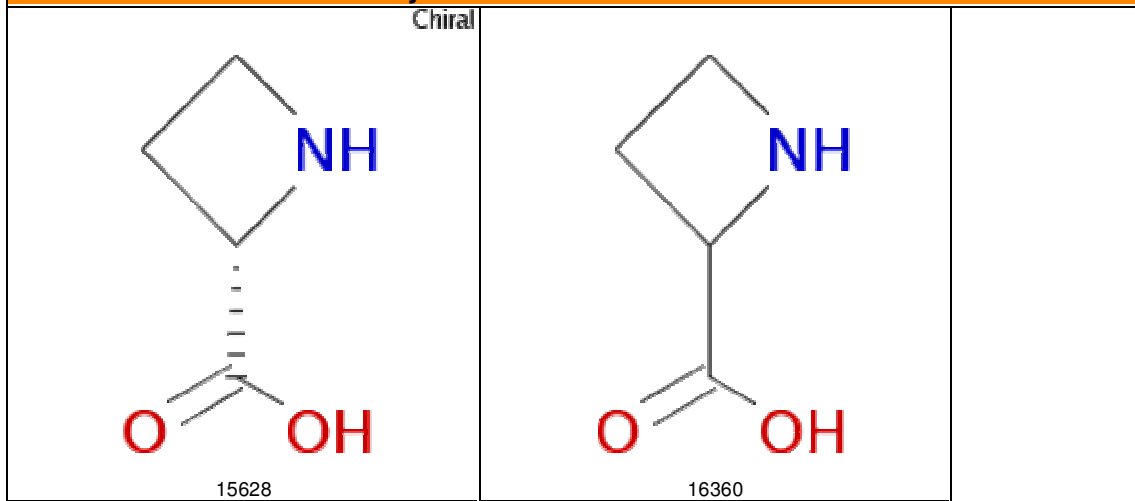

**Name: 2-azido-2'-O-methyl adenosine**

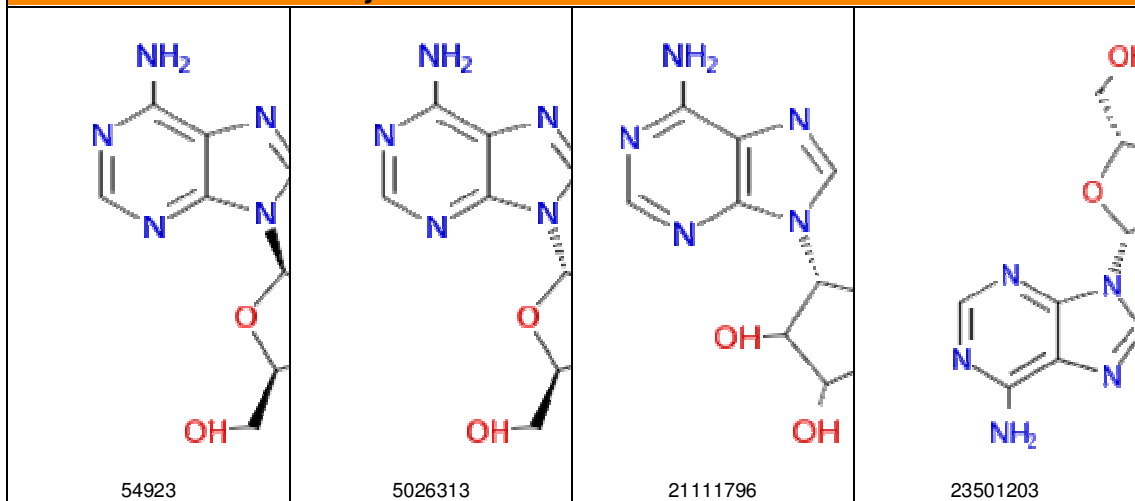

**Name: 1L-myo-inositol-1-phosphate**

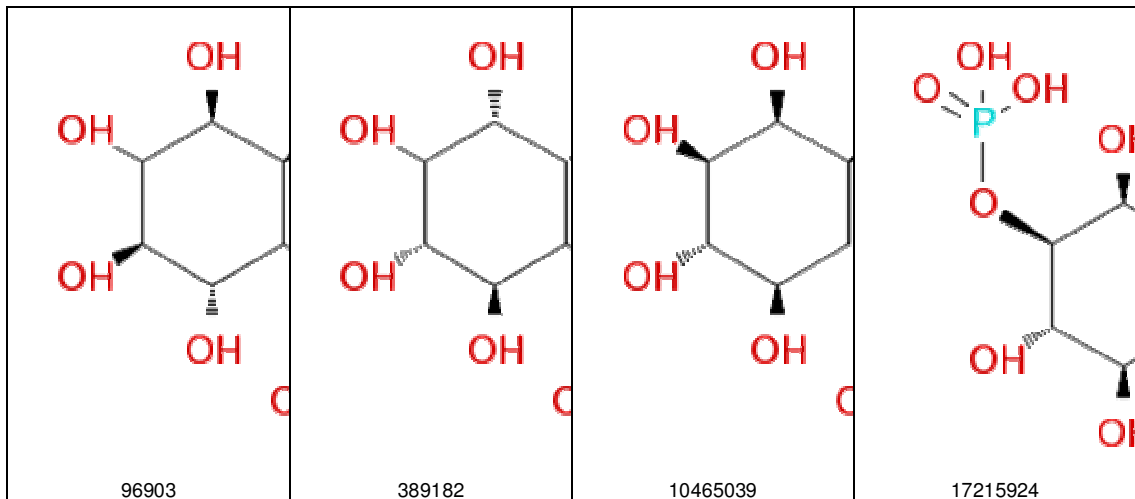

Name: glutamine glutamic acid

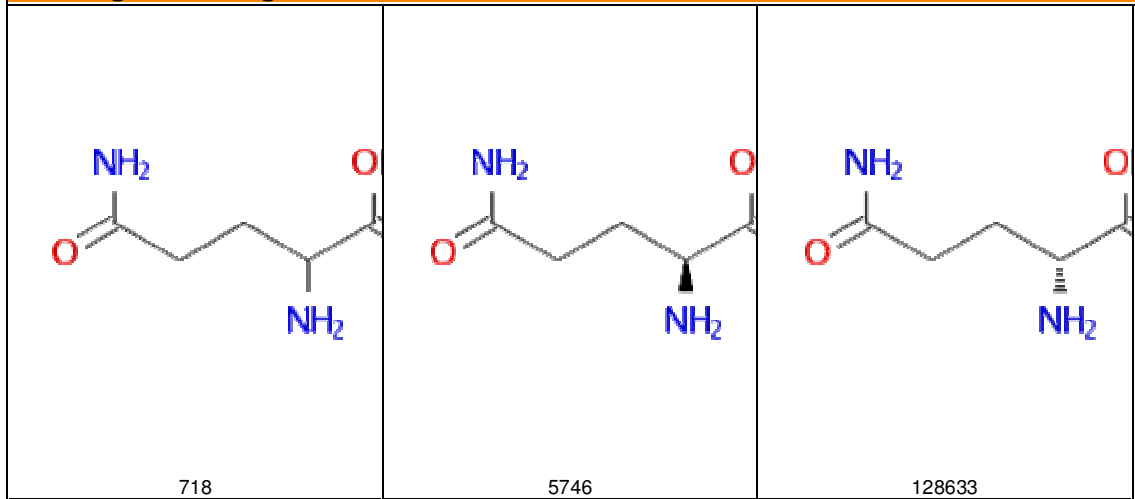

Name: n-dodecyl-beta-D-maltoside

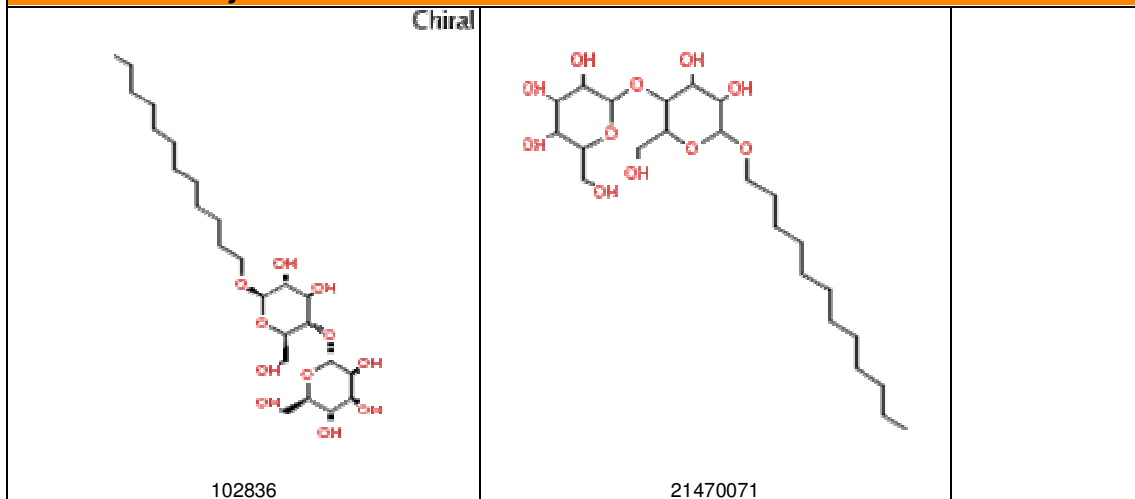

Name: n-dodecyl-beta-d-maltoside

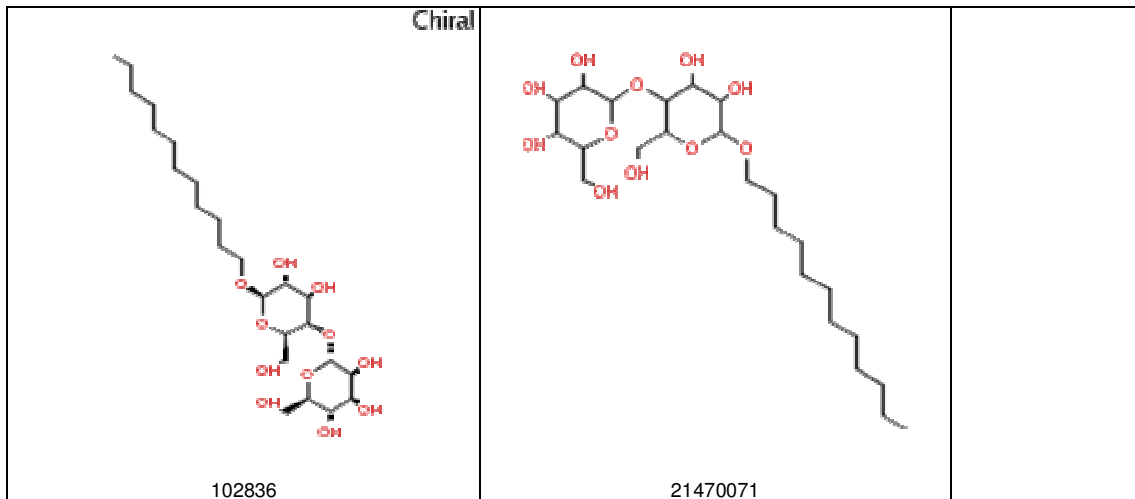

**Name: glycosyl-phosphatidyl inositol**

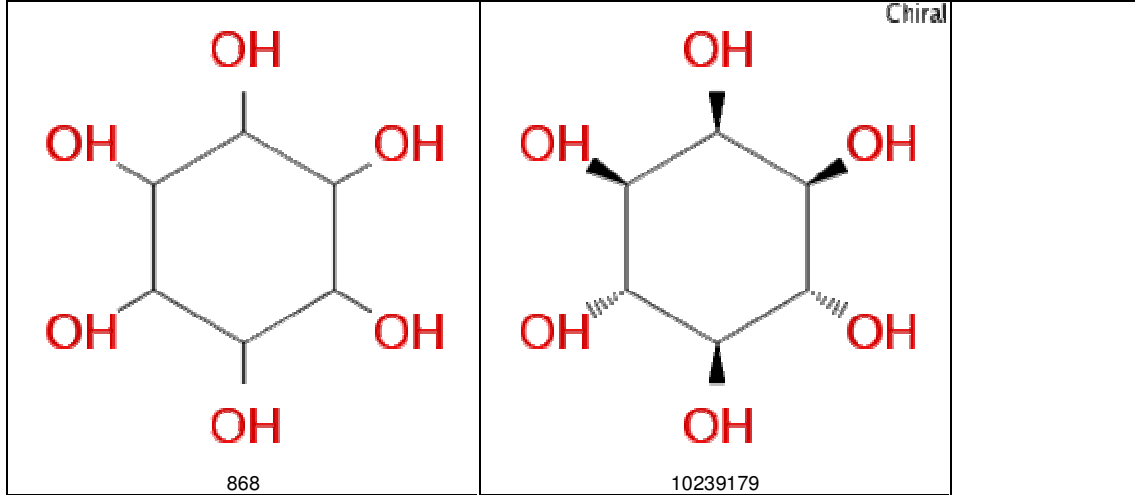

**Name: beta-estradiol 17-(beta-D-glucuronide)**

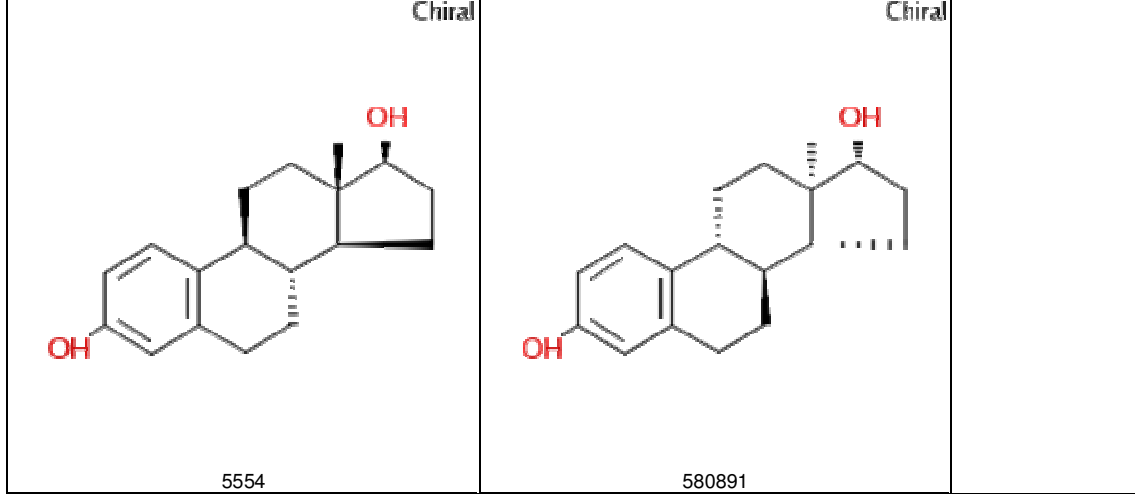

**Name: 3-hexenoyl-CoA**

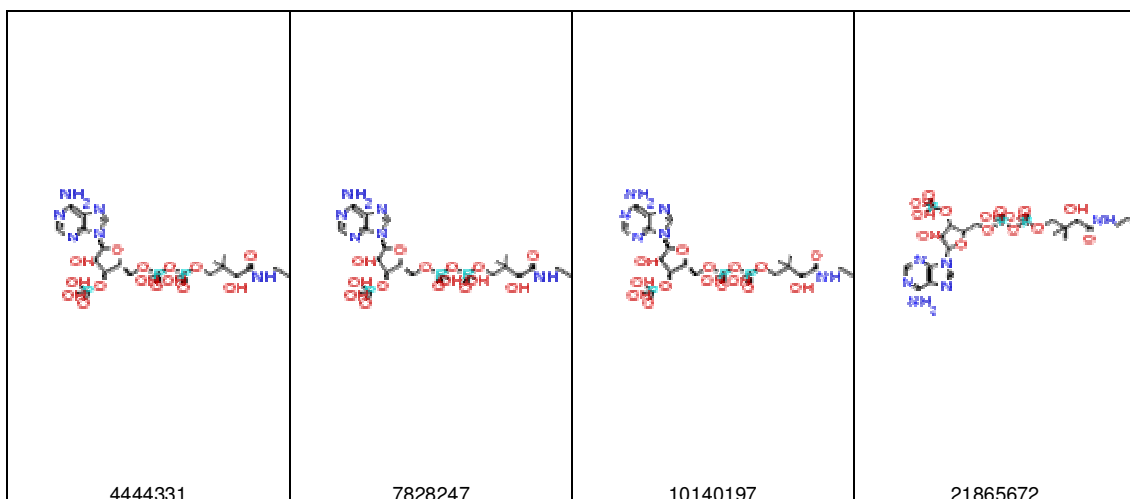

**Name: 2-octaprenyl-6-methoxy-1,4-benzoquinone**

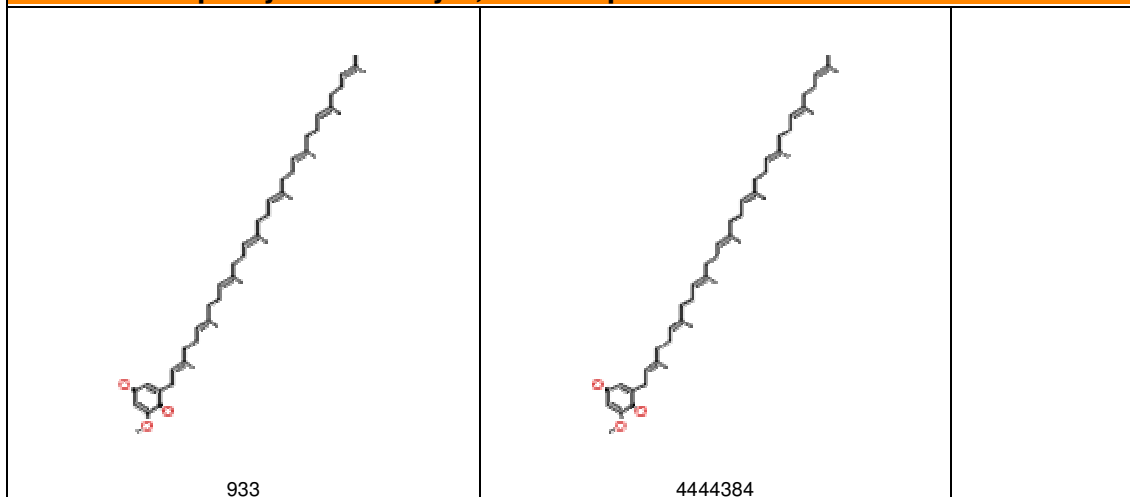

**Name: pyridine-3-aldehyde--adenine dinucleotide**

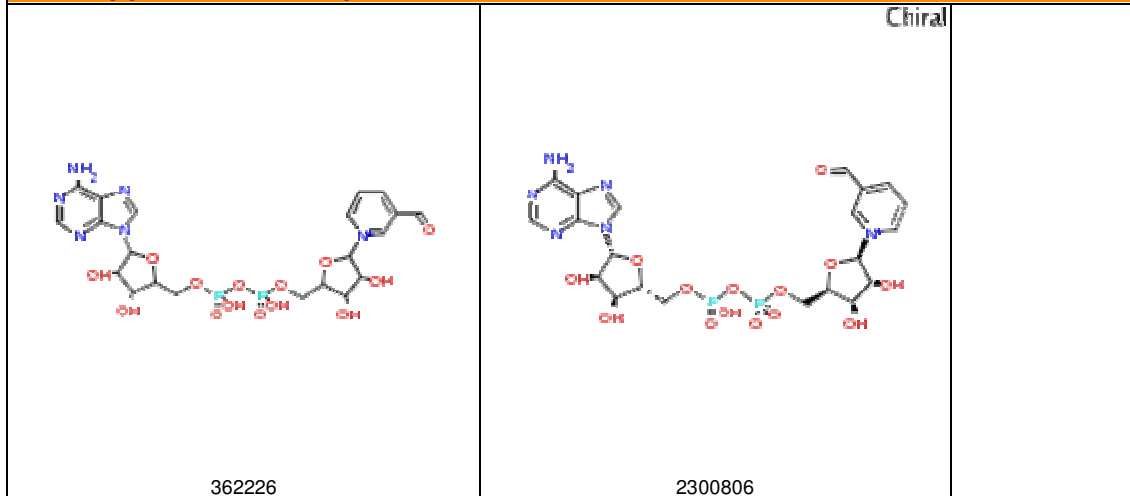

**Name: 2-thiocytidine**

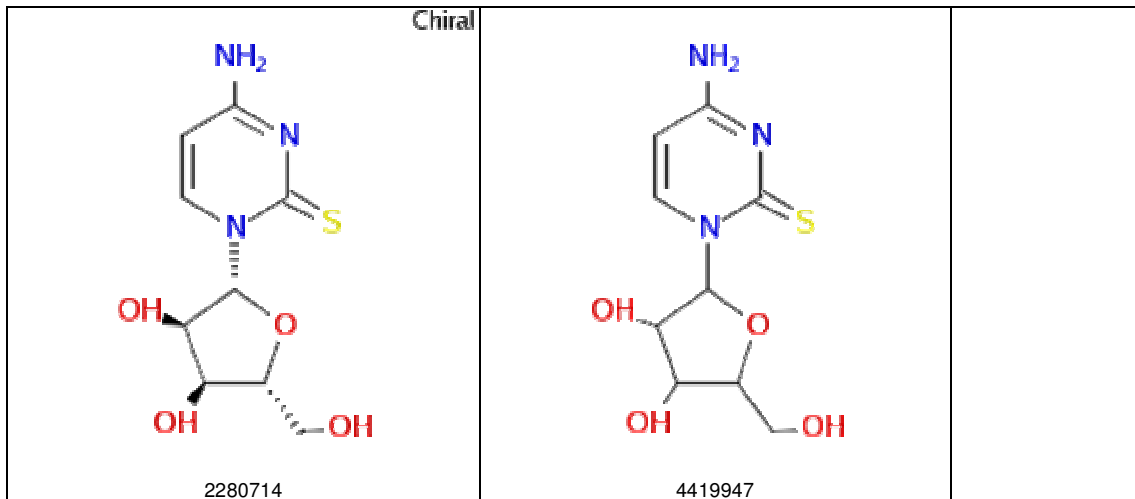

**Name: N-methyl-1-deoxythymine**

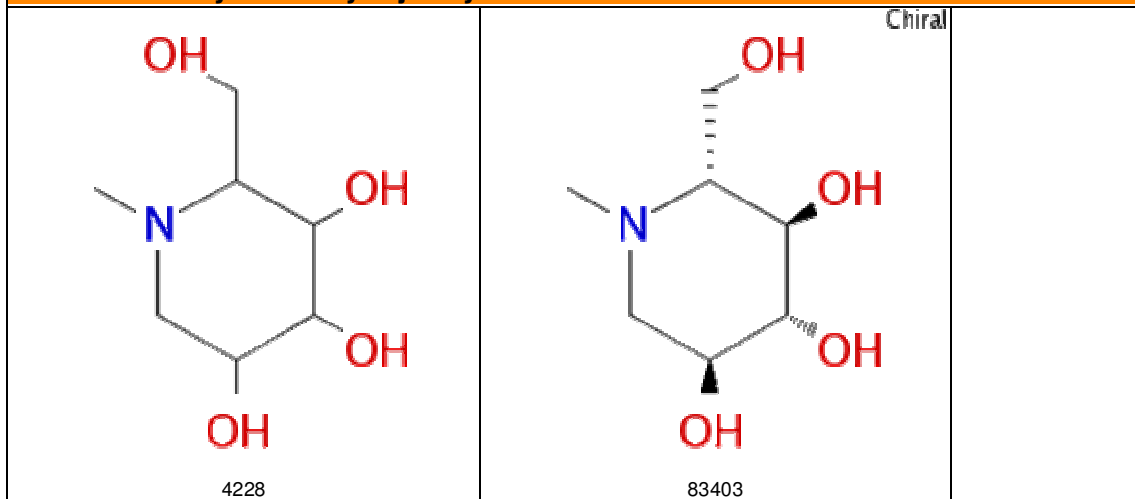

**Name: inositol phospholipid**

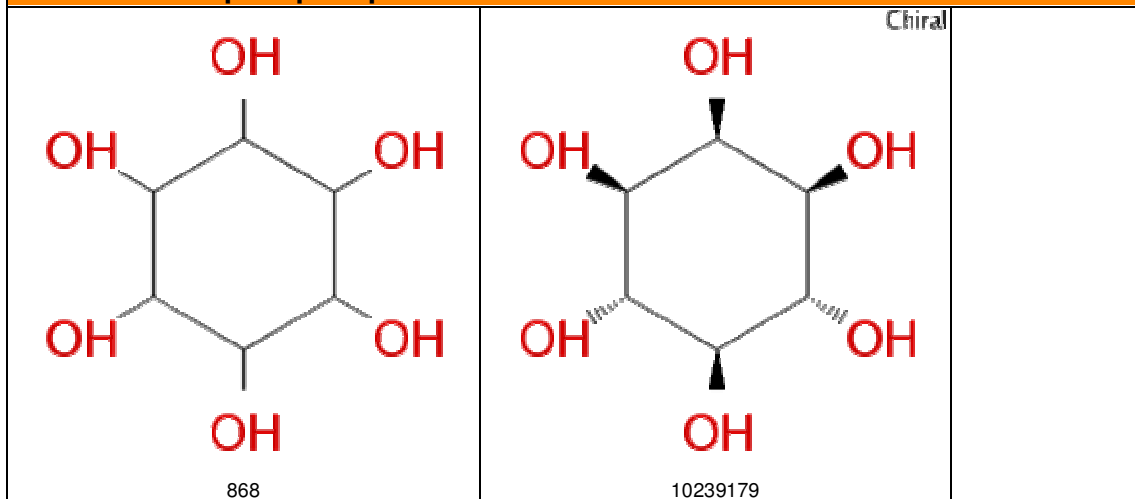

**Name: adenosine triphosphate-inorganicpyrophosphate**

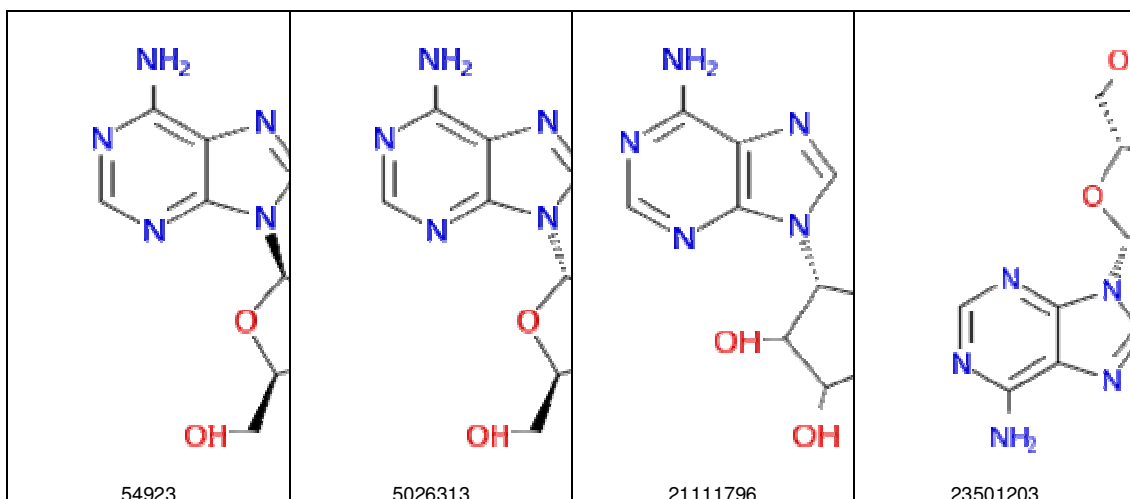

**Name: n-hexanoyl-CoA**

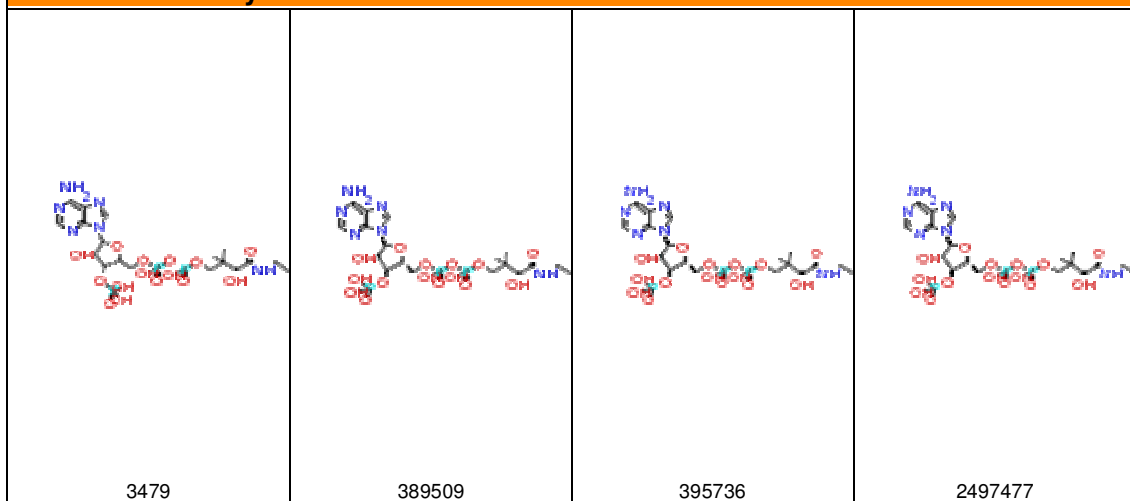

**Name: 5'-N-ethylcarboxamidoadenosine**

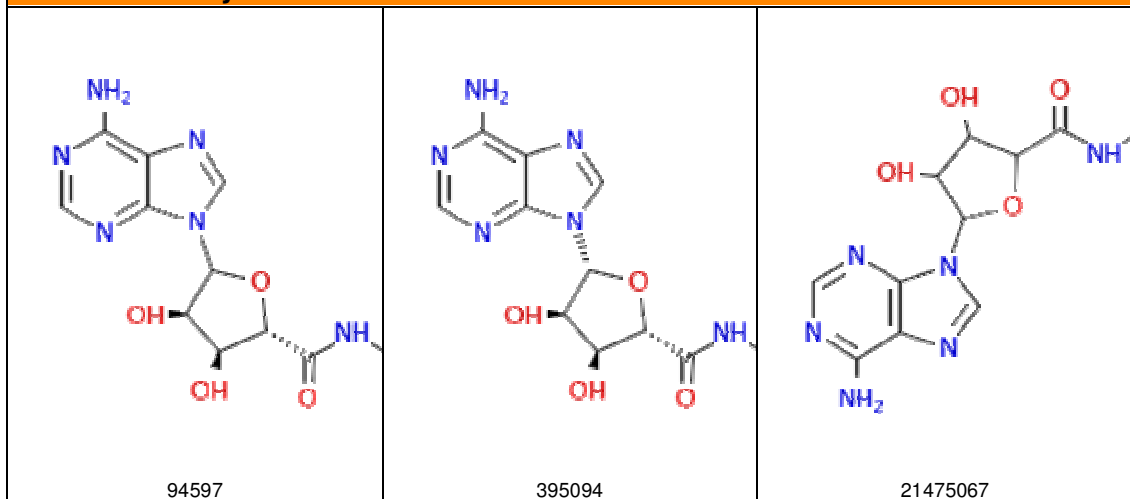

**Name: cytosine arabinoside**

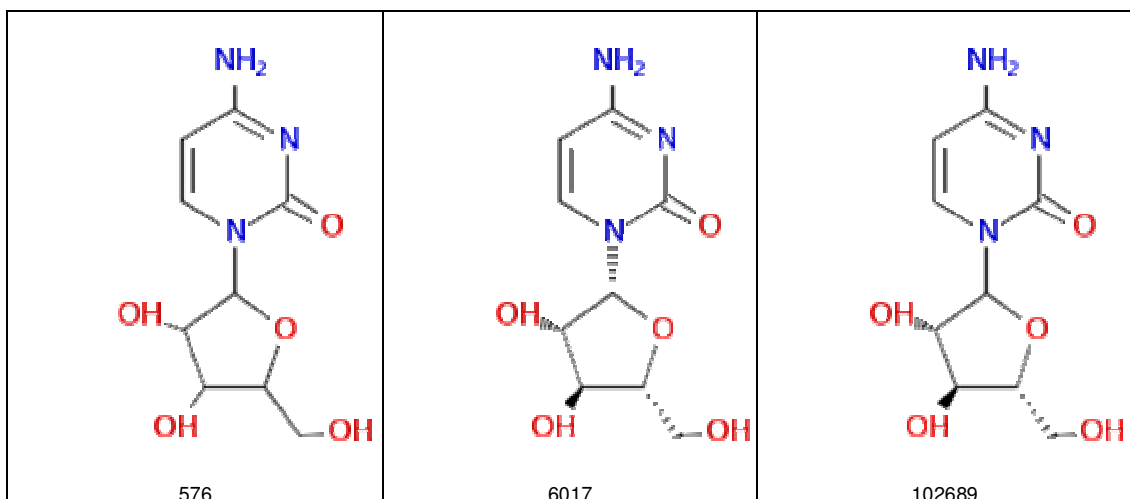

**Name: pyridine-3-aldehyde-adenine dinucleotide**

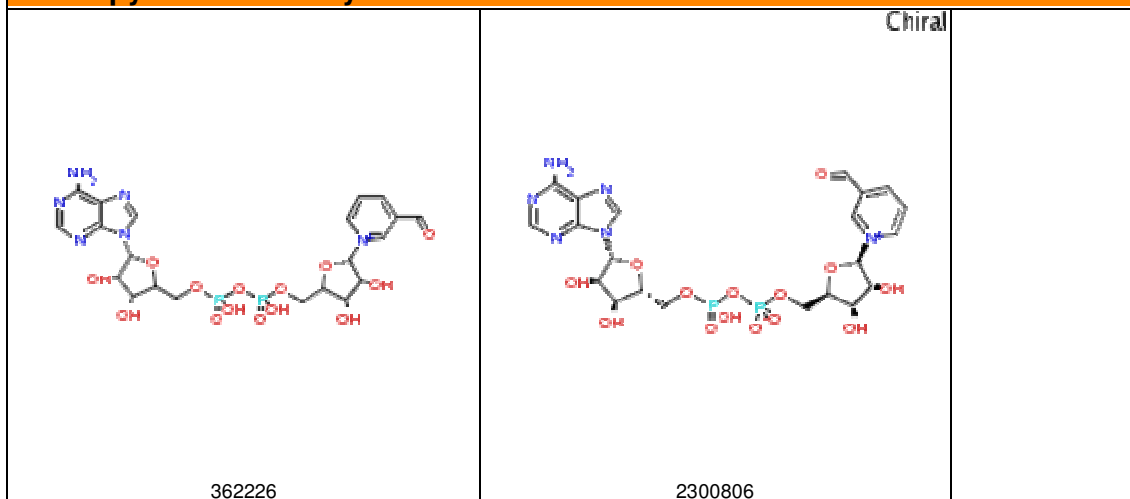

**Name: biotin hydrazide**

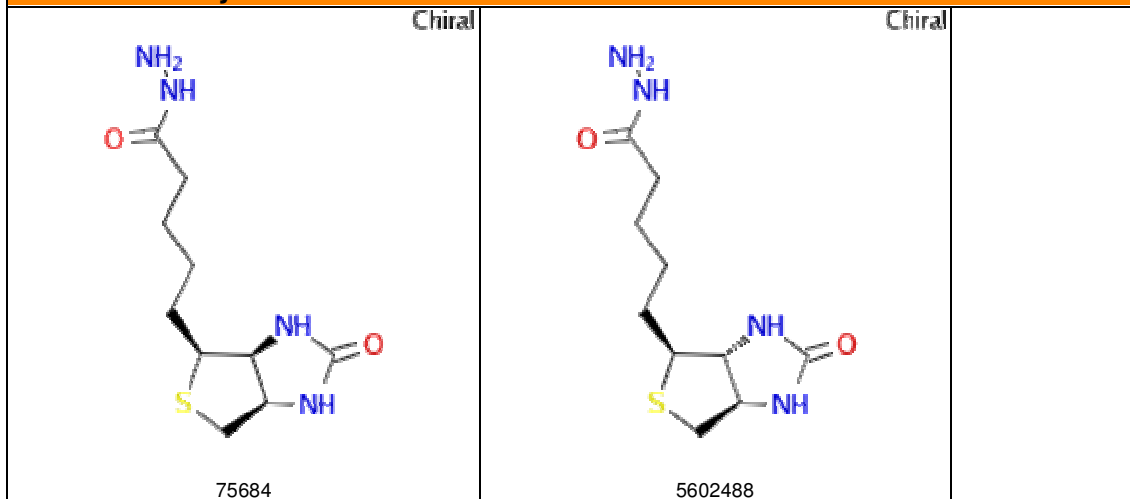

**Name: inositol sphingolipid**



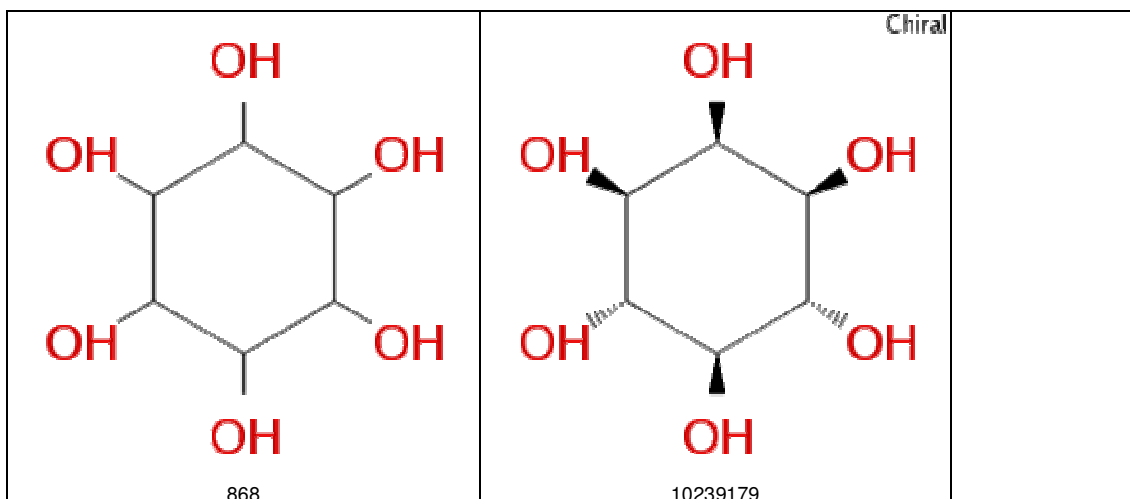

**Name: sorbic acid**

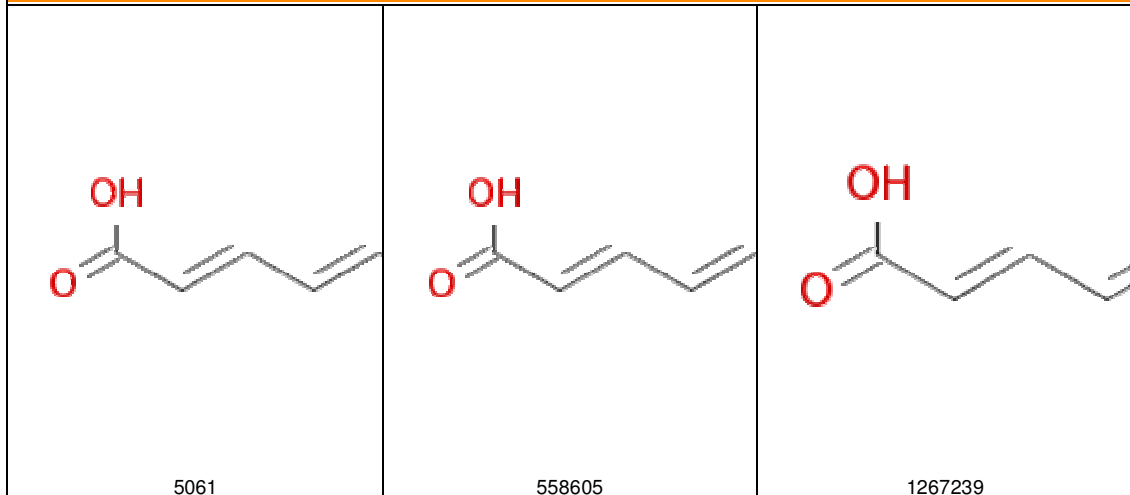

**Name: D-(-)-threo-2-amino-1-[p-nitrophenyl]-1,3-propanediol**

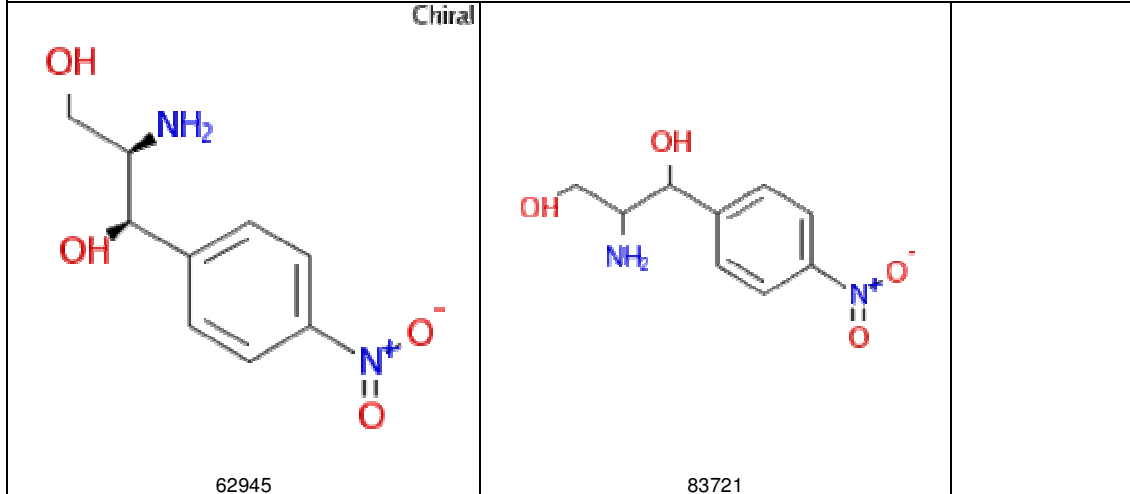

**Name: d-(-)-threo-2-amino-1-[p-nitrophenyl]-1,3-propanediol**

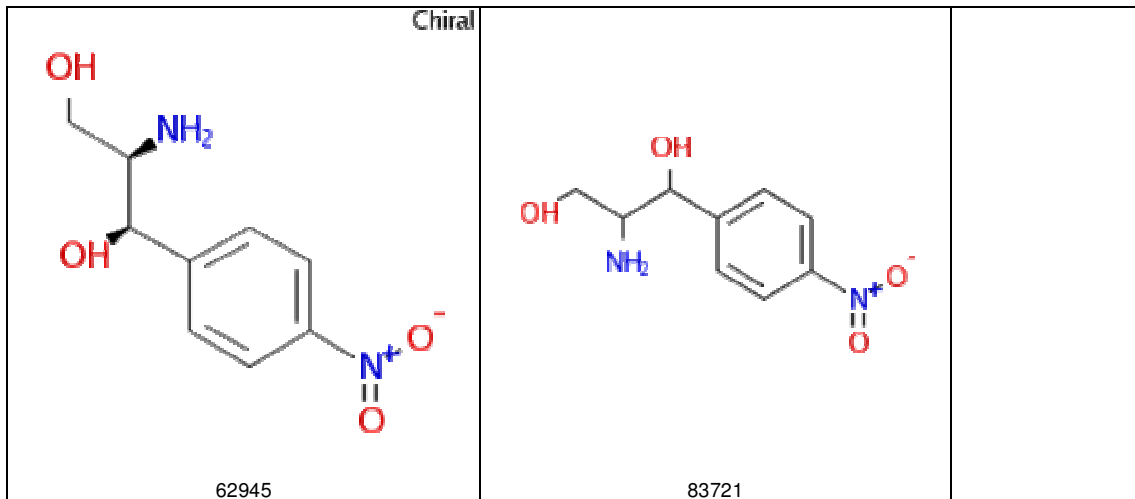

**Name: acyl-CoA**

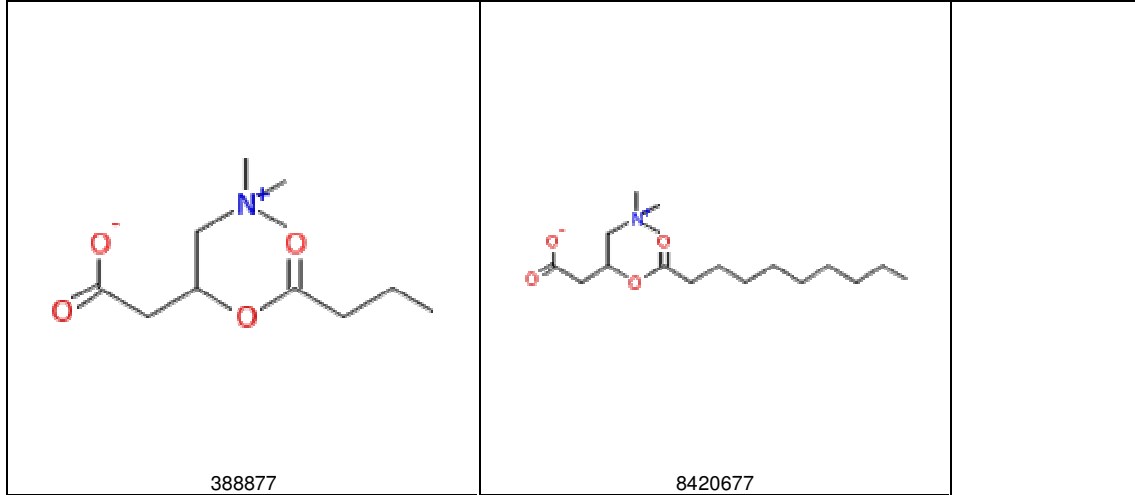

**Name: guanosine nucleotide**

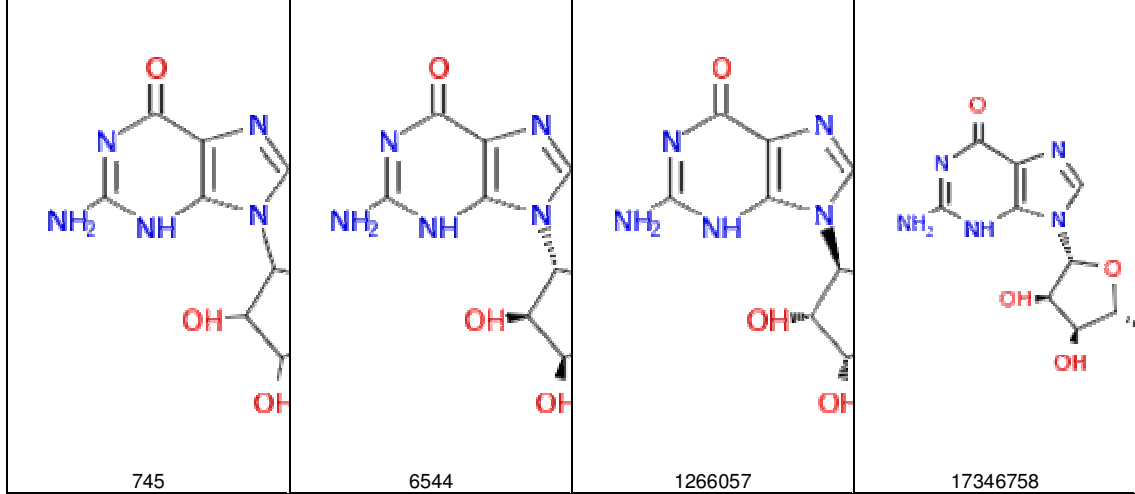

**Name: cysteine sulfonic acid**

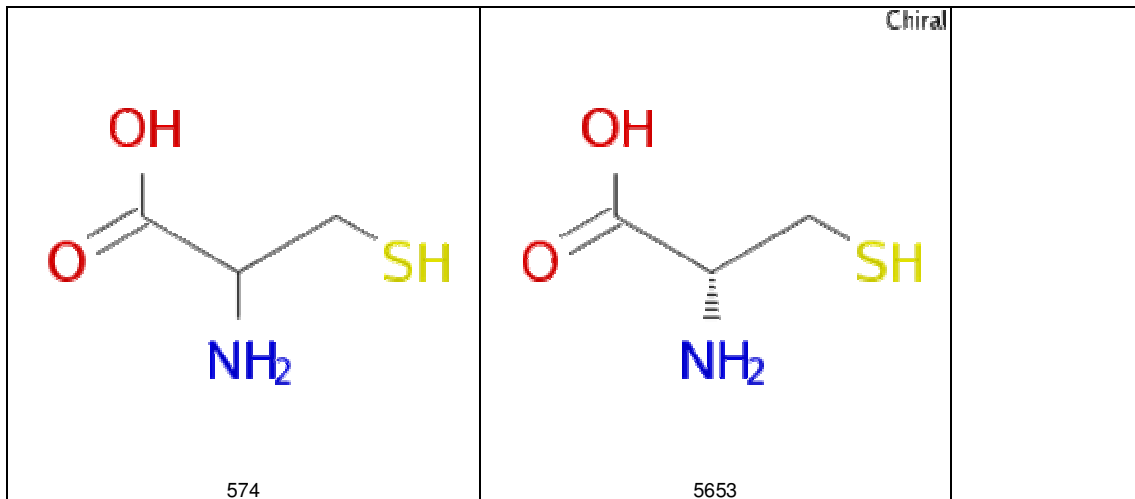

**Name: phorbol-12-myristate-13-acetate**

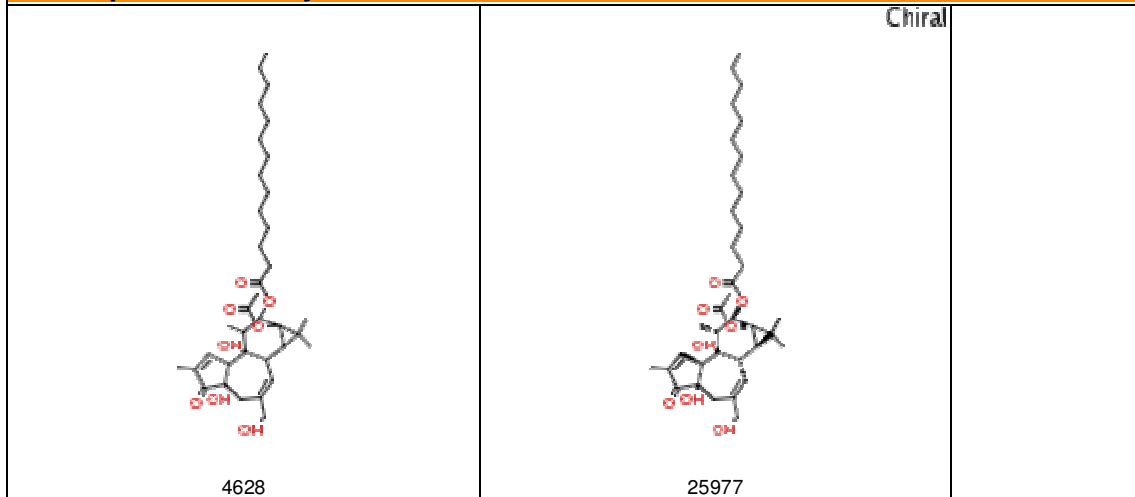

**Name: 17alpha-estradiol**

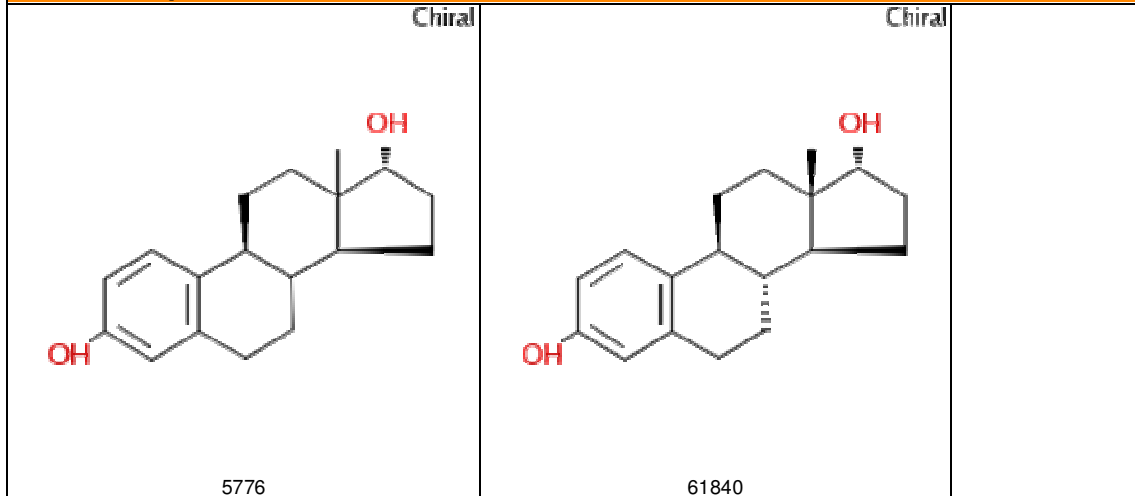

**Name: Ergosterol 7-hydroperoxide**

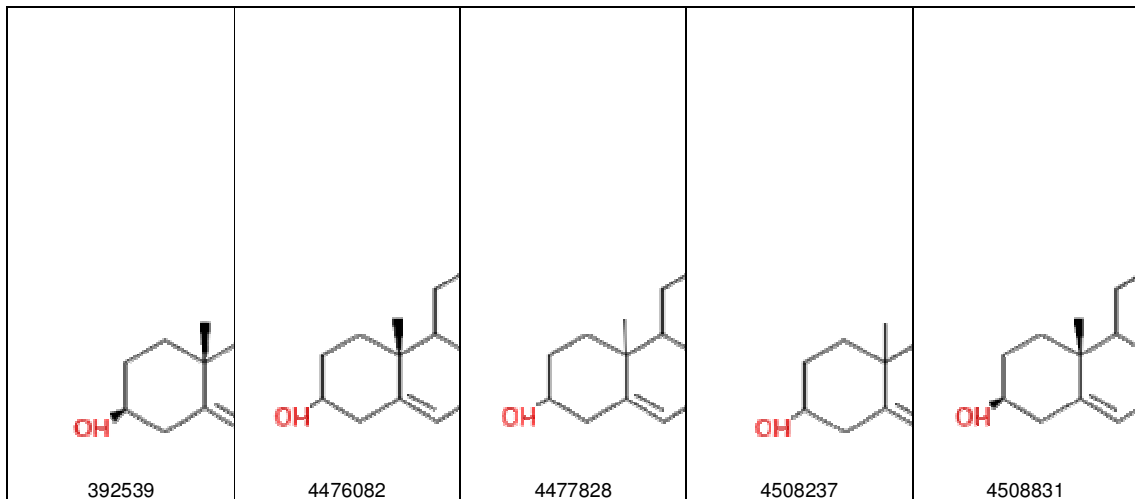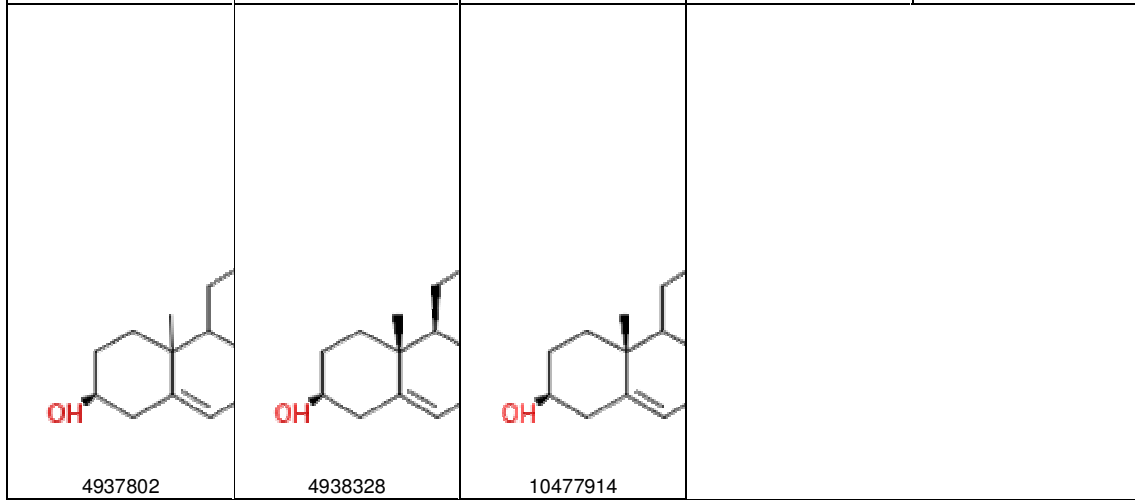

**Name: cysteine-sulfonic acid**

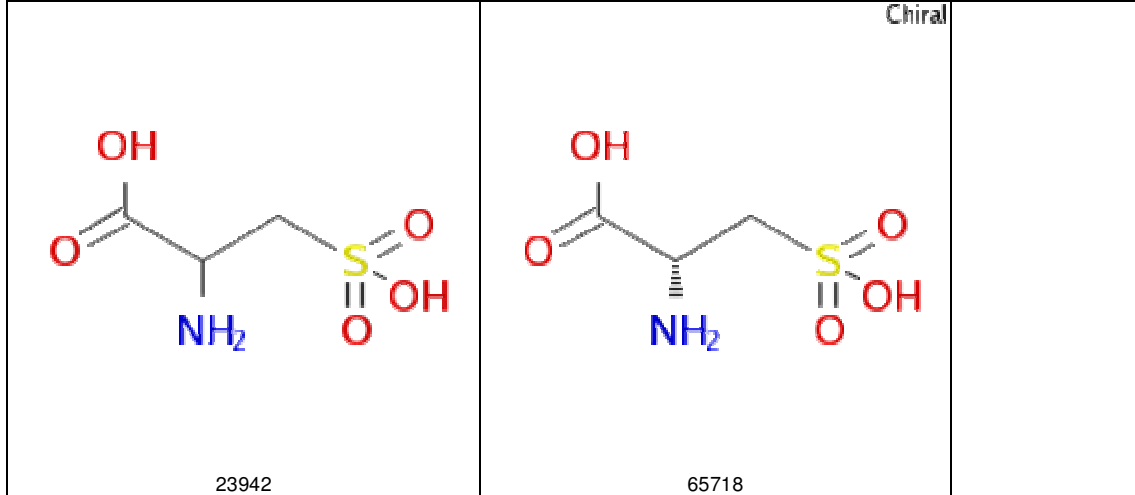

**Name: glutamate semialdehyde**

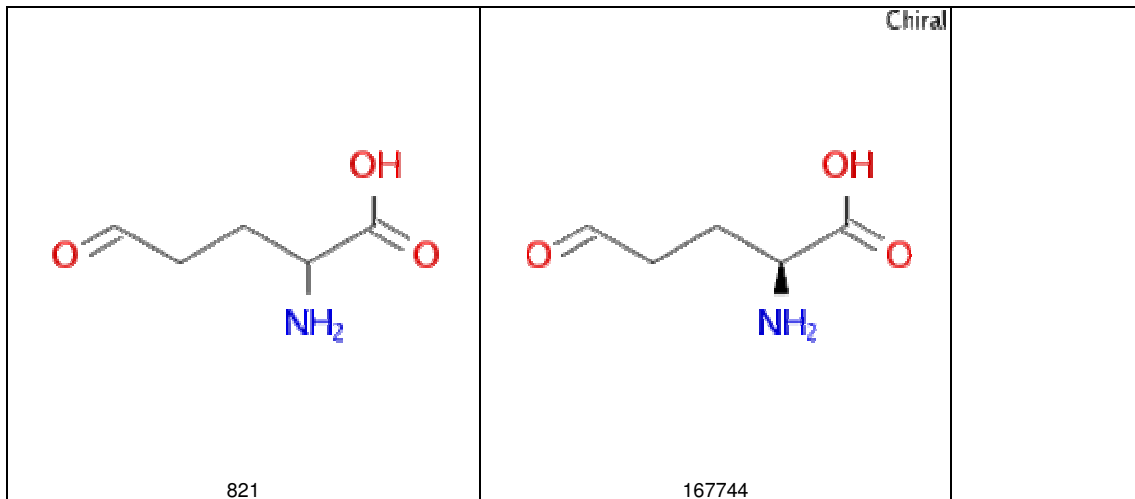

**Name: papuamide B**

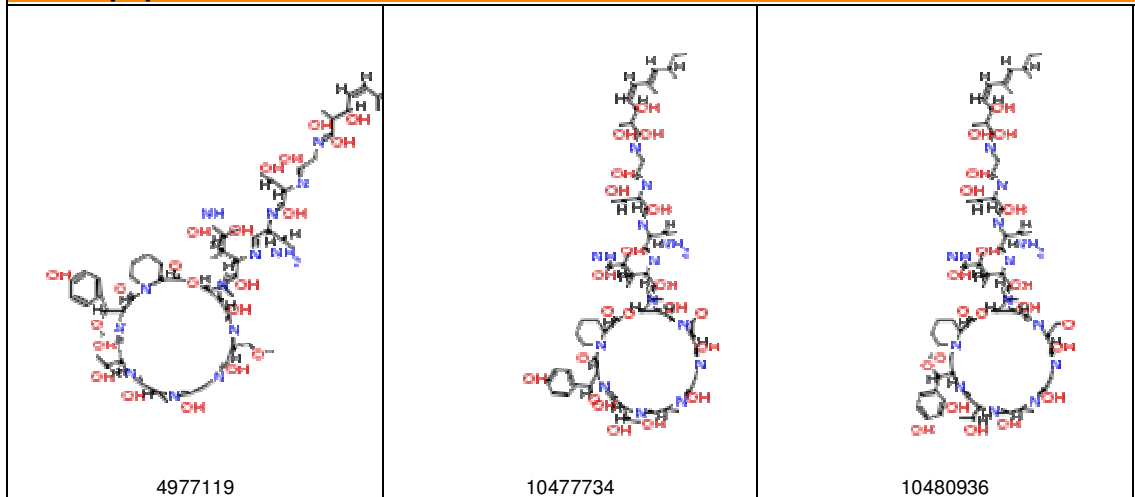

**Name: lysine S-2-aminoethyl-L-cysteine**

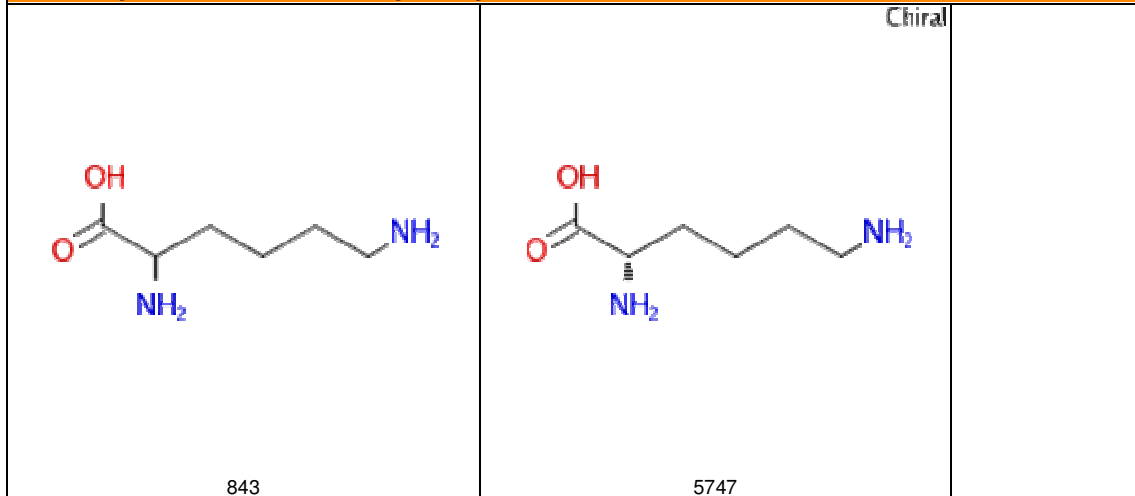

**Name: L-homocysteine sulfonamide**

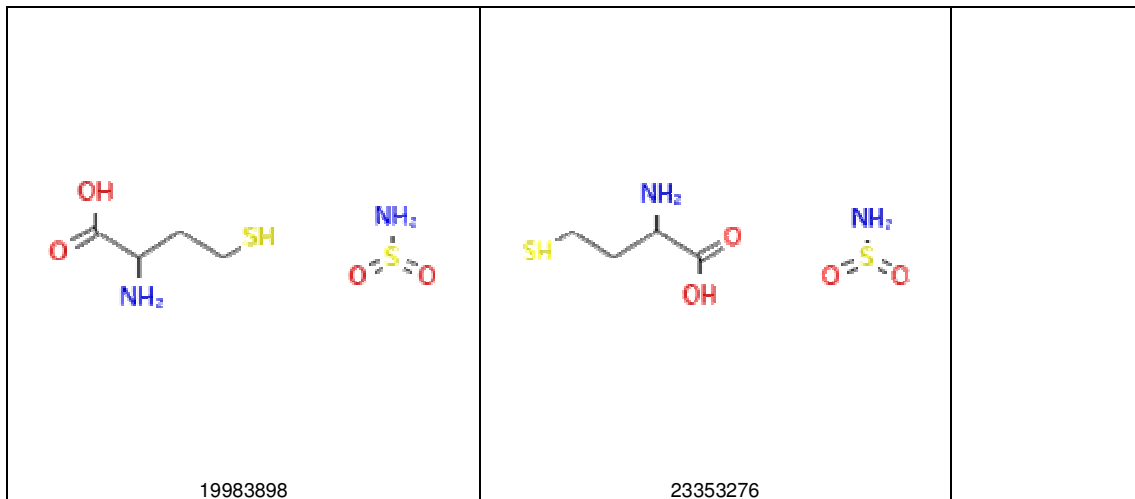

**Name: mevalonate diphosphate**

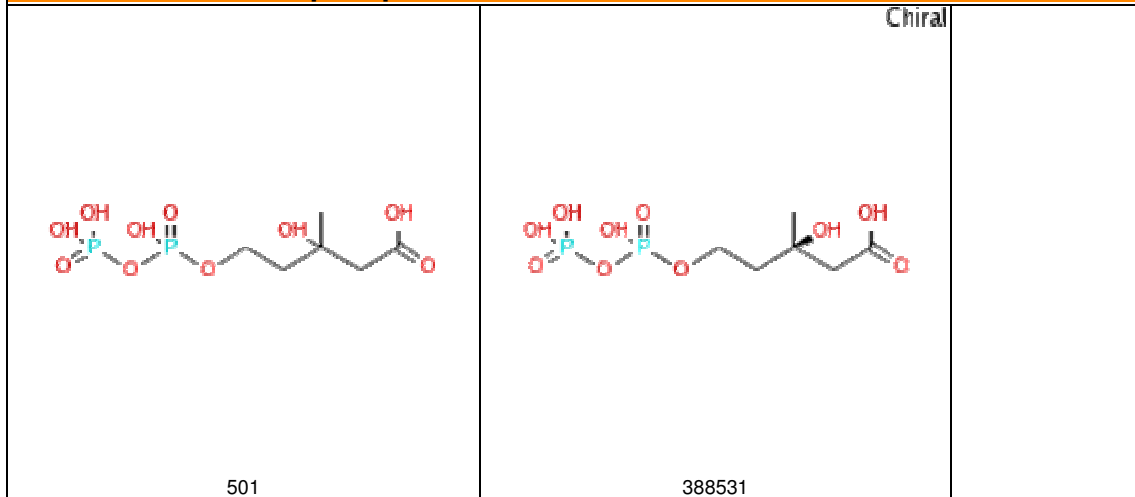

**Name: Phorbol 12-myristate 13-acetate**

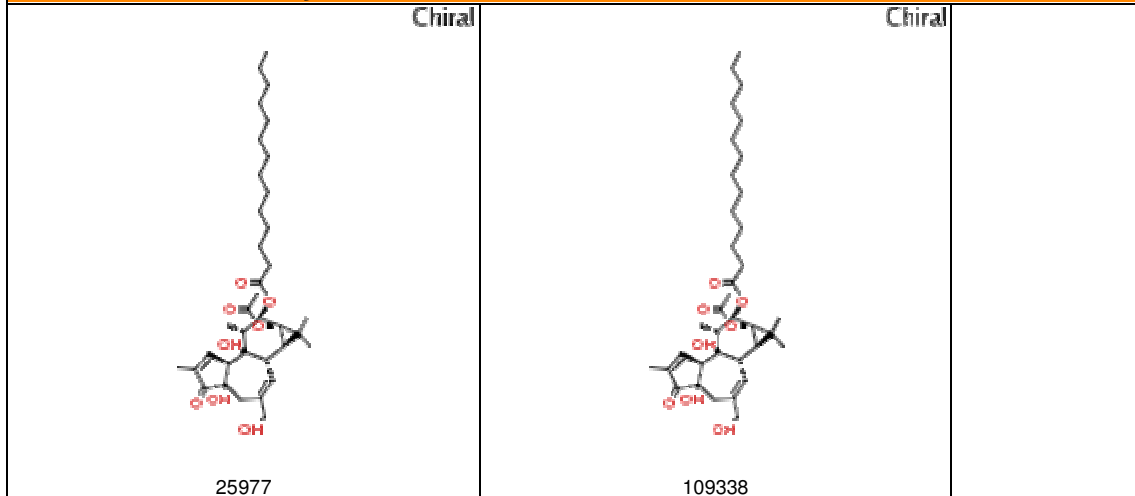

**Name: inositol glycerophospholipids**



**Name: 2-deoxyribose**

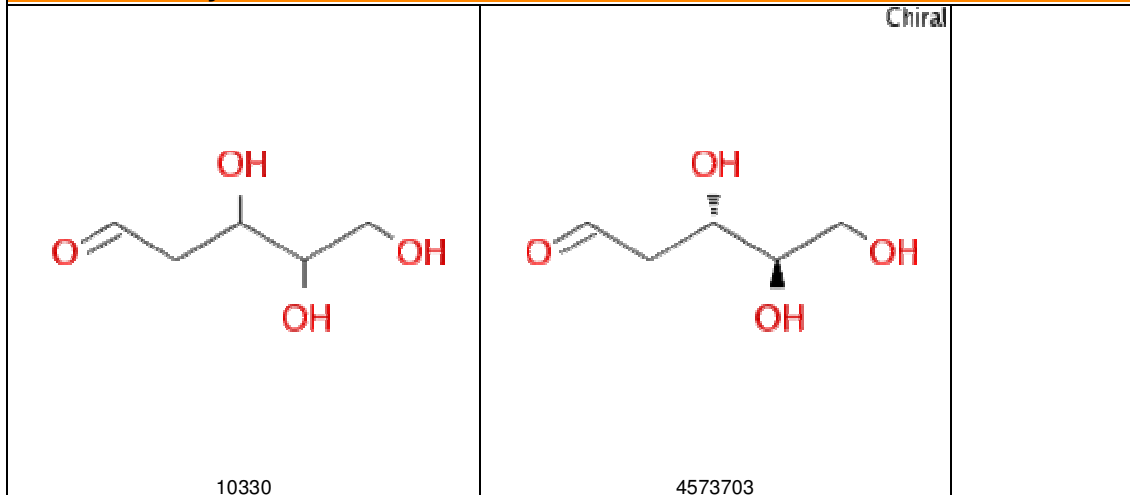

**Name: aspartate semialdehyde**

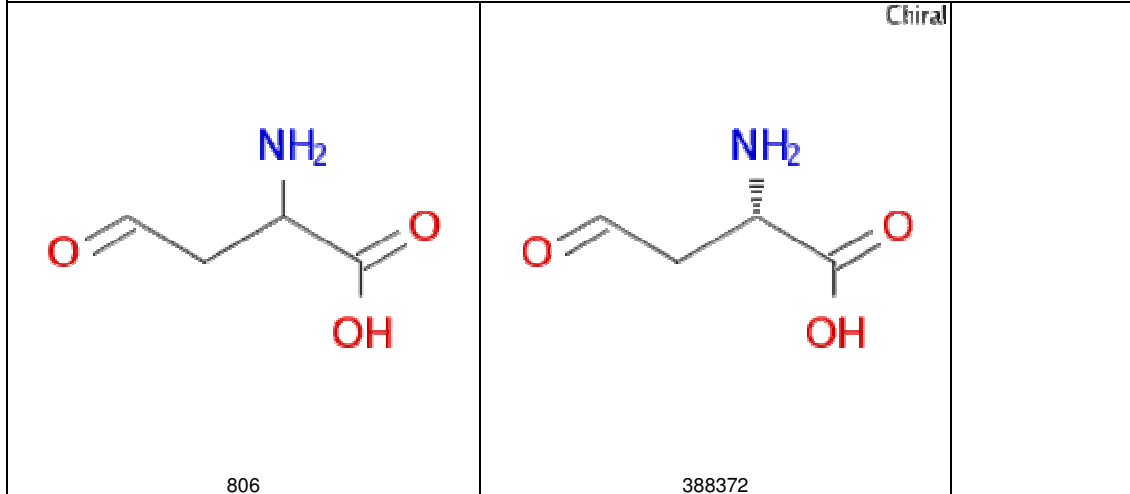

**Name: squalene epoxide**

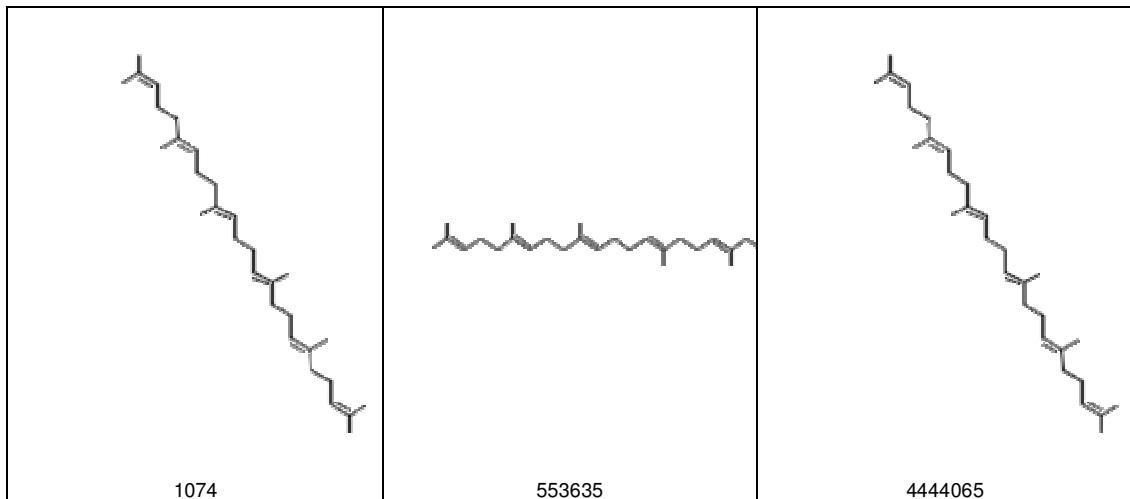

**Name: CoA thioesters**

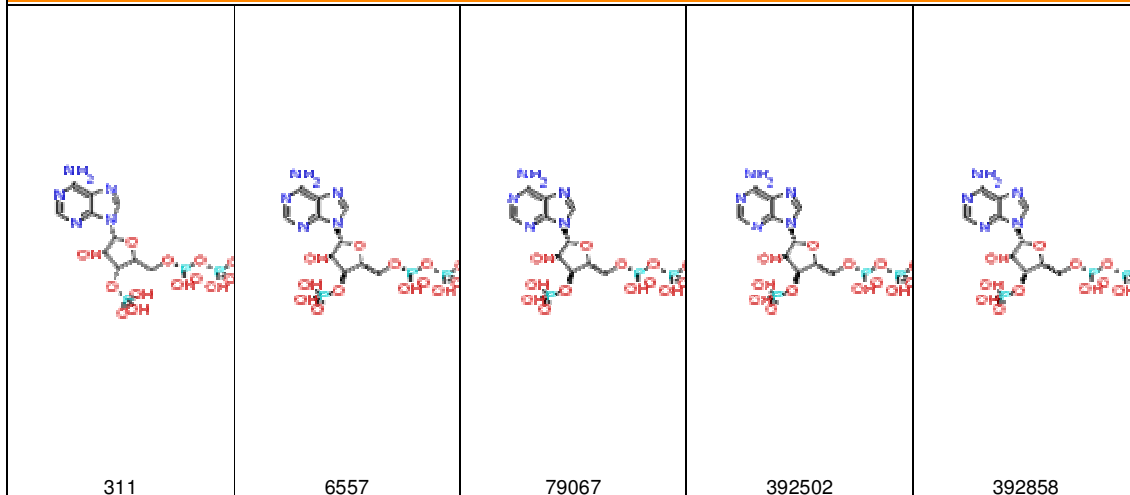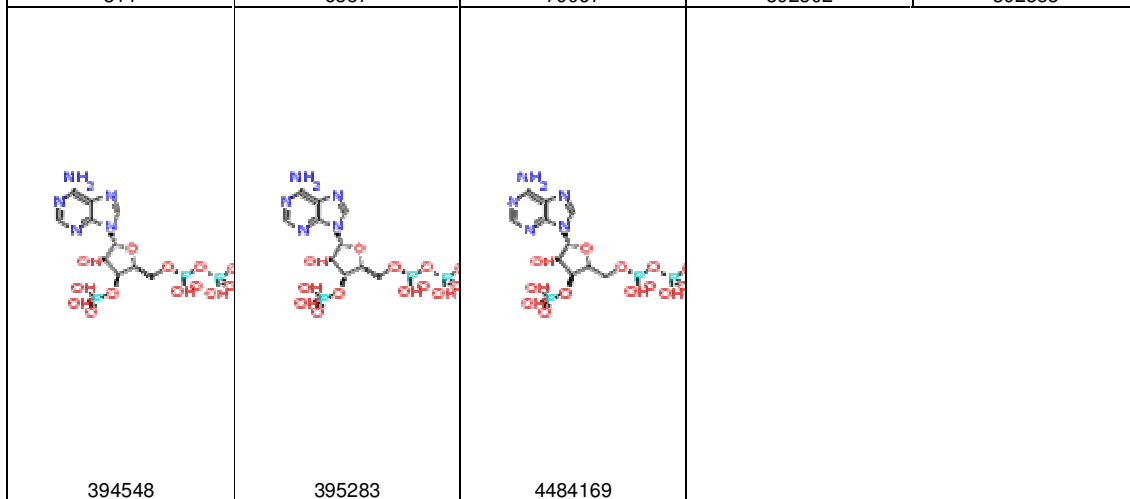

**Name: alpha-D-mannopyranosyl-(1-->2)-alpha-D-mannopyranose**



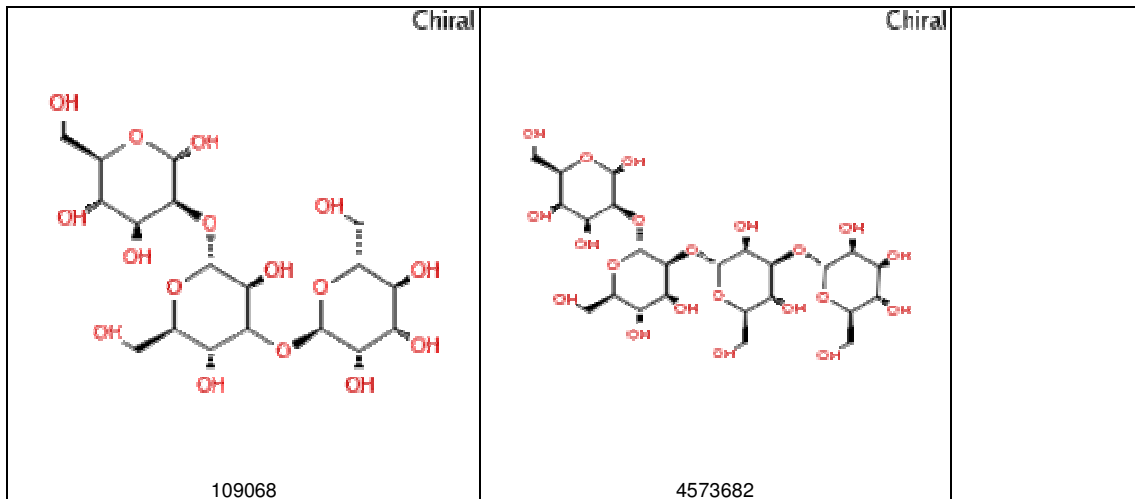

**Name: guanosine 5'-3-O-(thio)triphosphate**

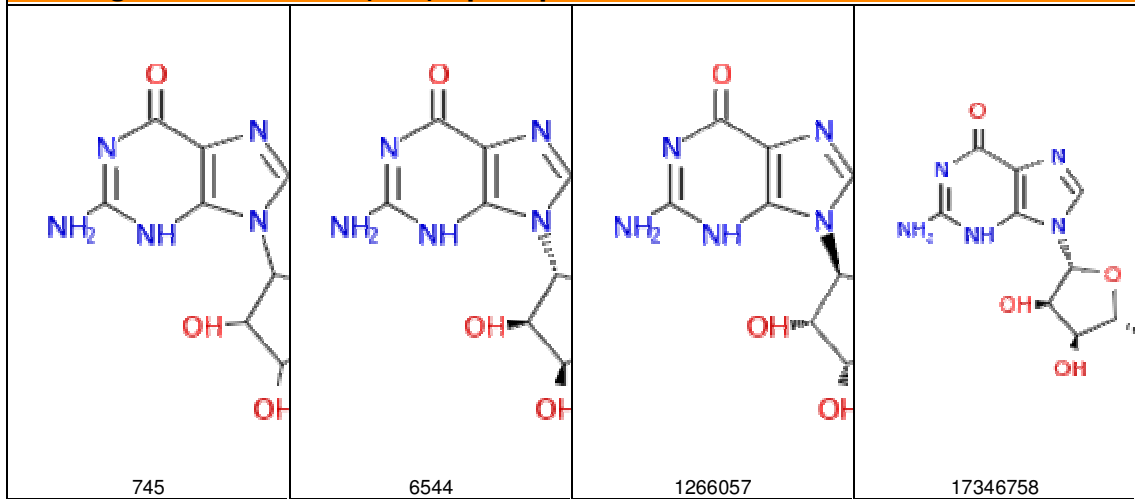

**Name: glutathione thiolate**

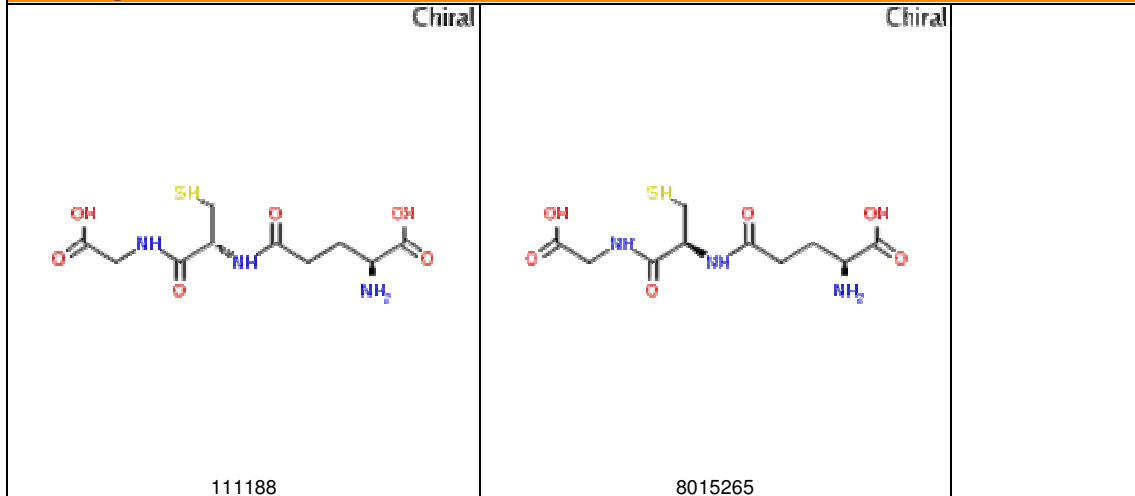

**Name: vacuolar proton ATPase**

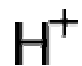

1010

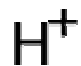

4574144

**Name: o-phenanthroline**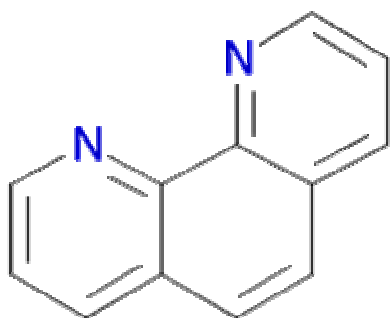

1278

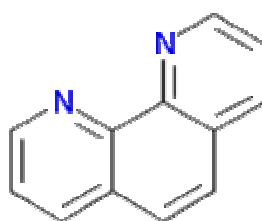

19955

 $OH_2$ **Name: O-phenanthroline**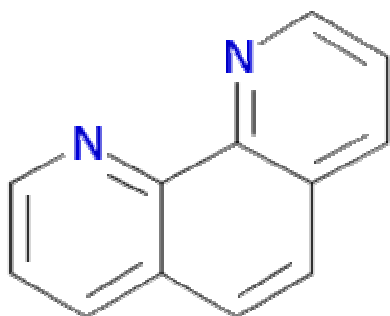

1278

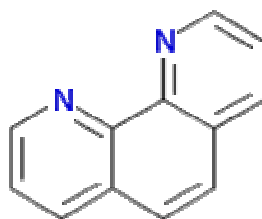

19955

 $OH_2$ **Name: leptomyacin B**

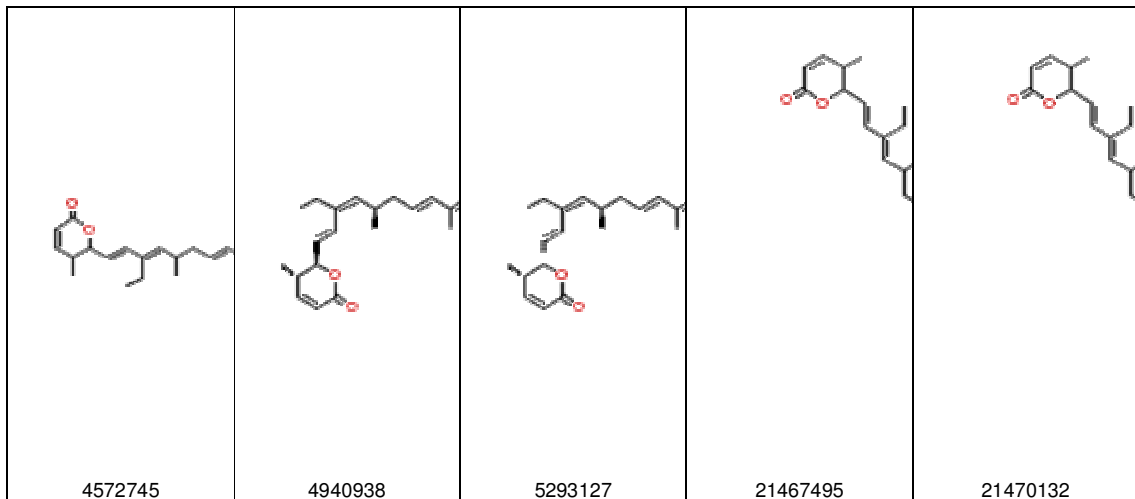

**Name: conduritol B epoxide**

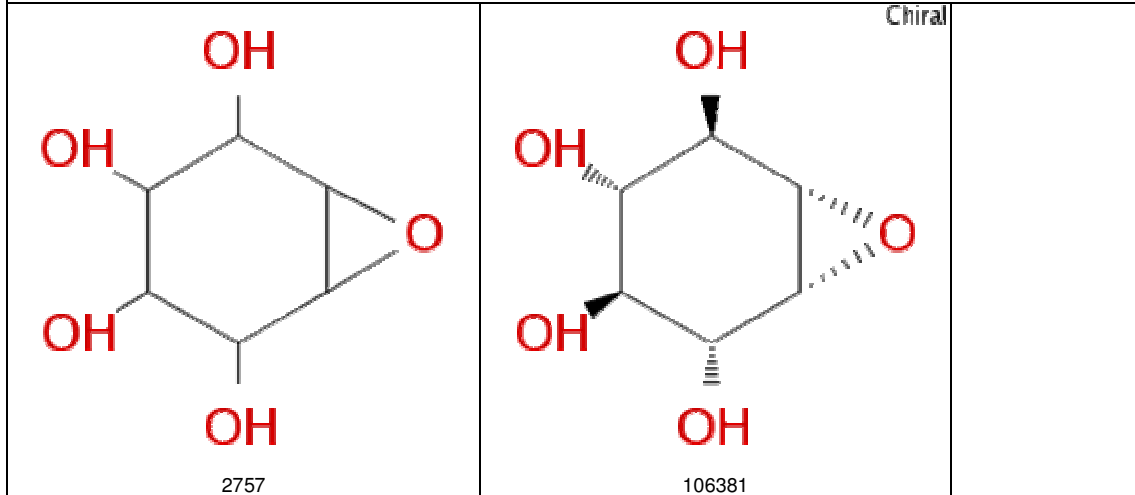

**Name: inositol monophosphates**

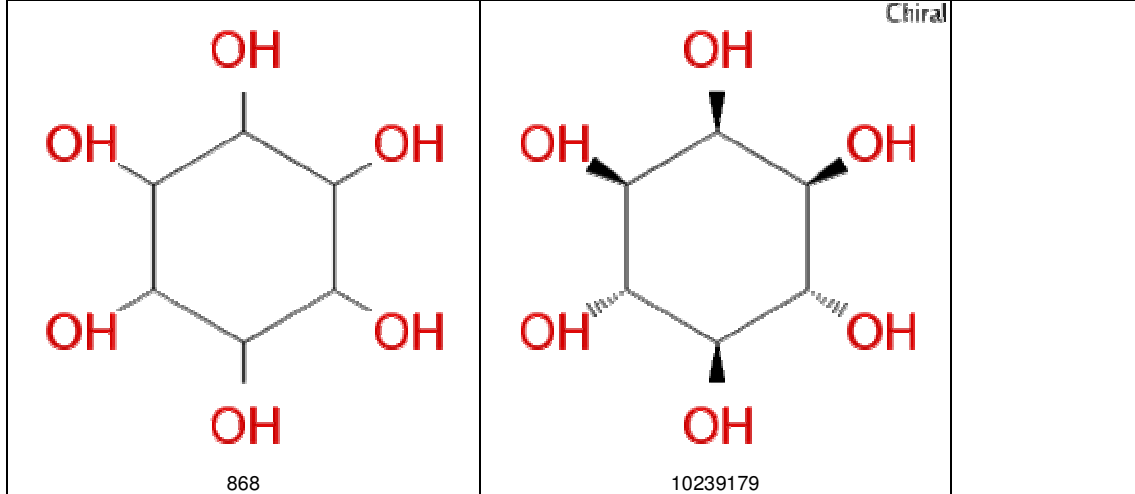

**Name: 3-diphosphoinositol pentakisphosphate**

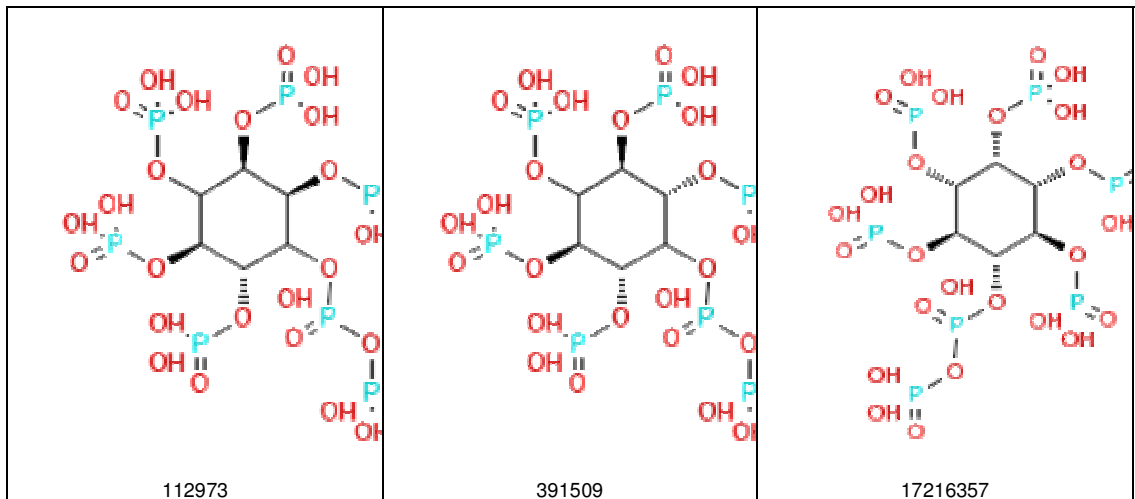

Name: acetyl CoA

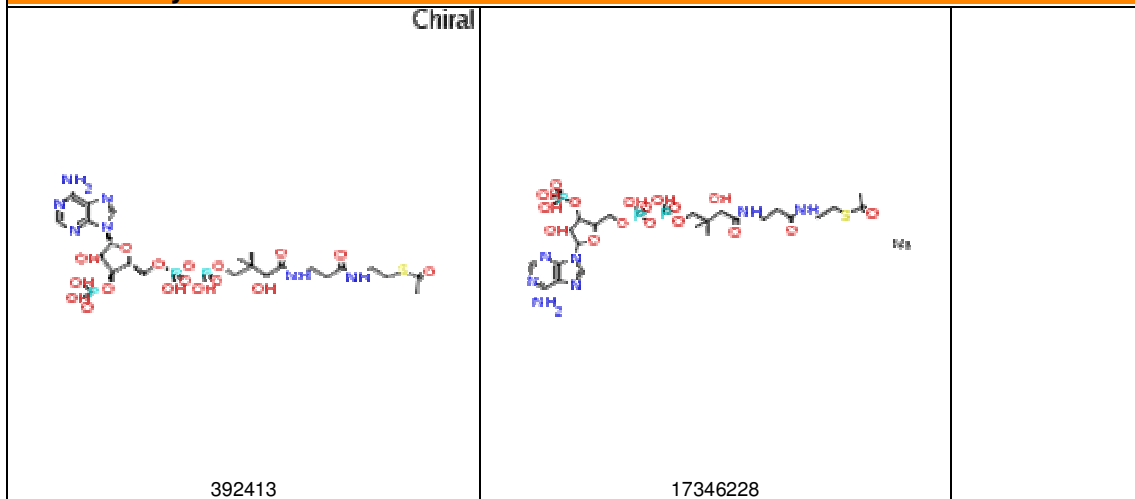

Name: GDP nucleotide

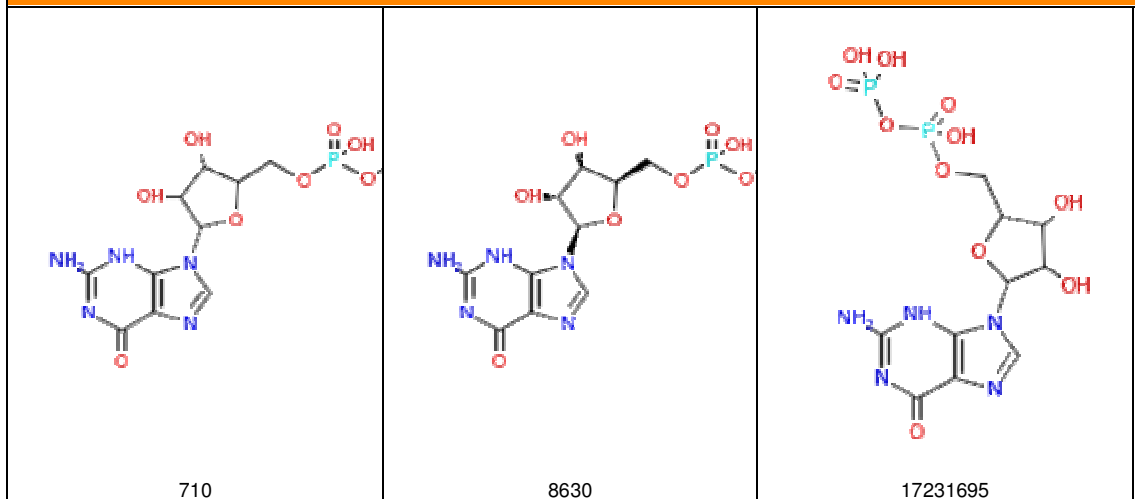

Name: Biotin-hydrazide

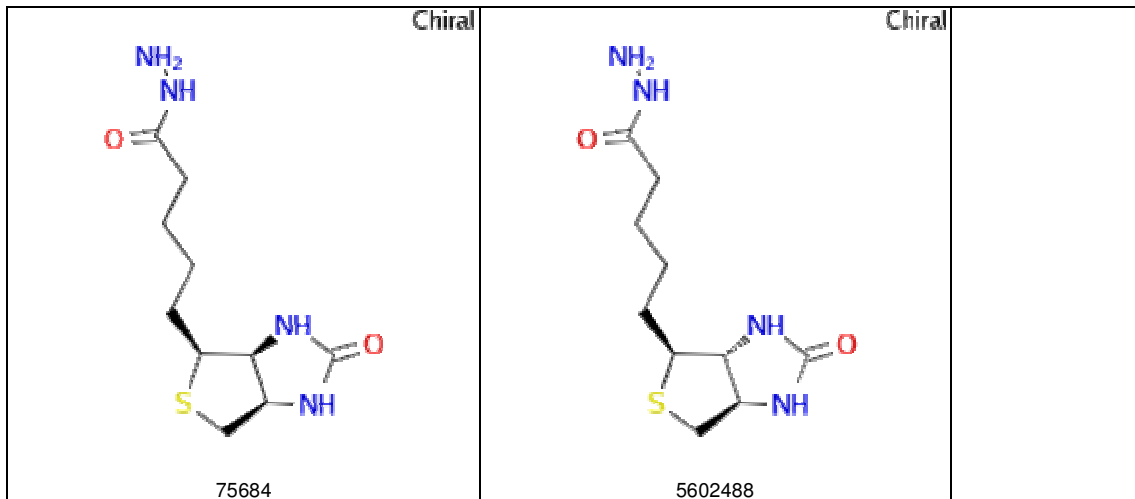

**Name: adenosine antimetabolites**

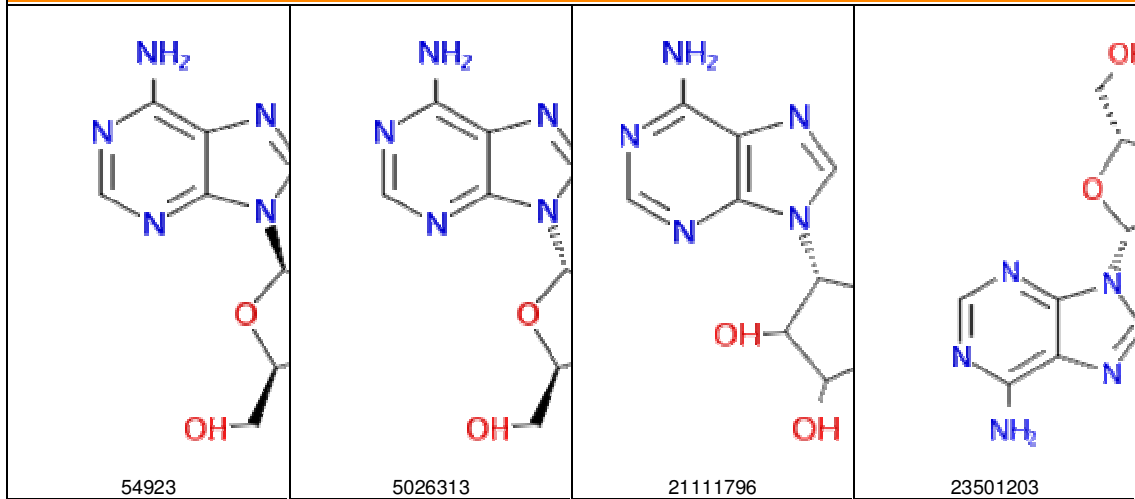

**Name: O-acetyl homoserine**

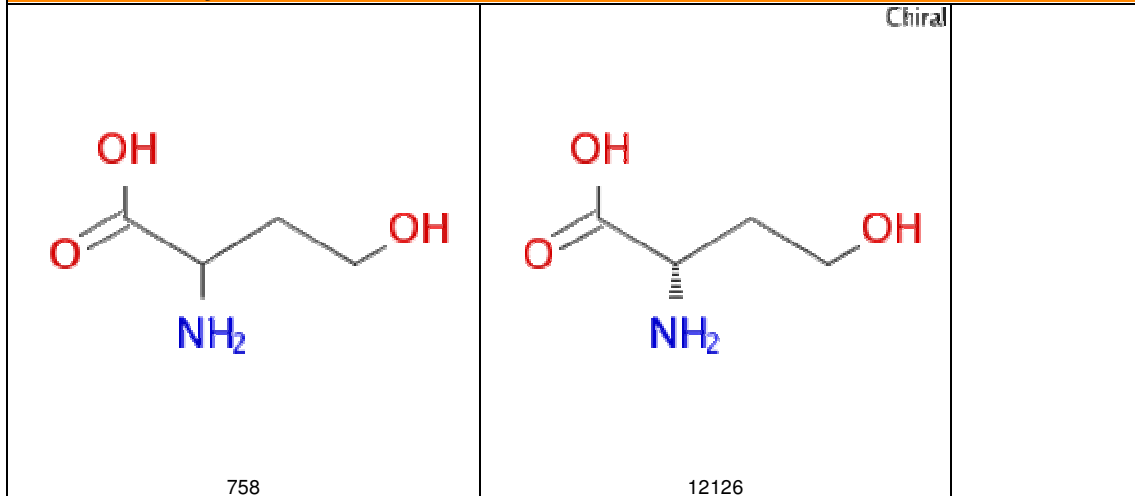

**Name: ribulose-5-phosphate**

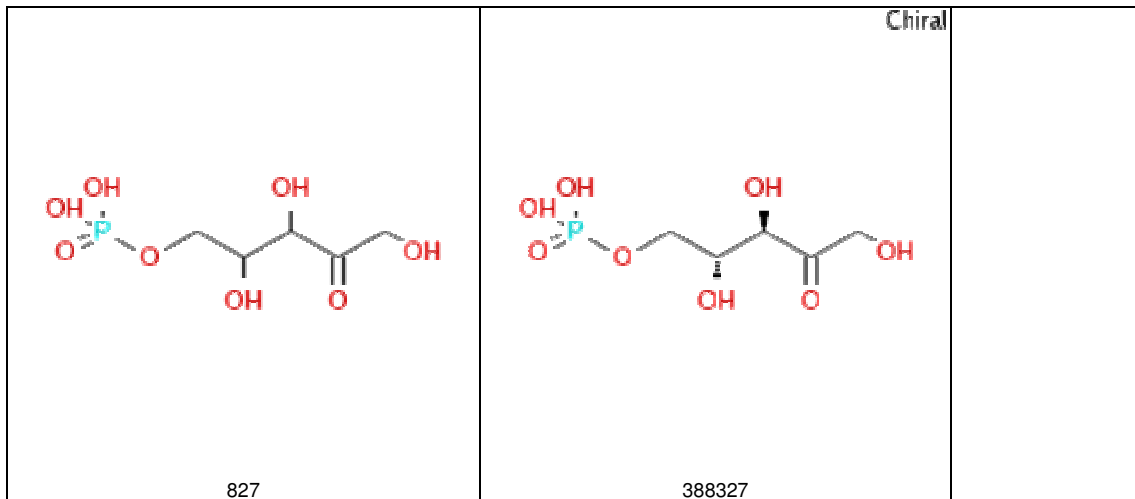

**Name: myristoyl CoA**

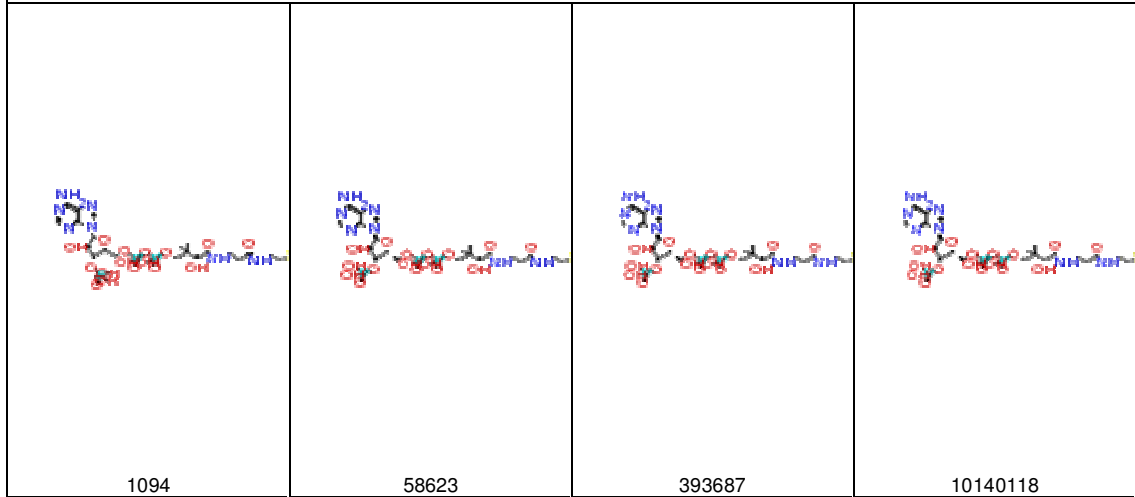

**Name: asparagine synthetase**

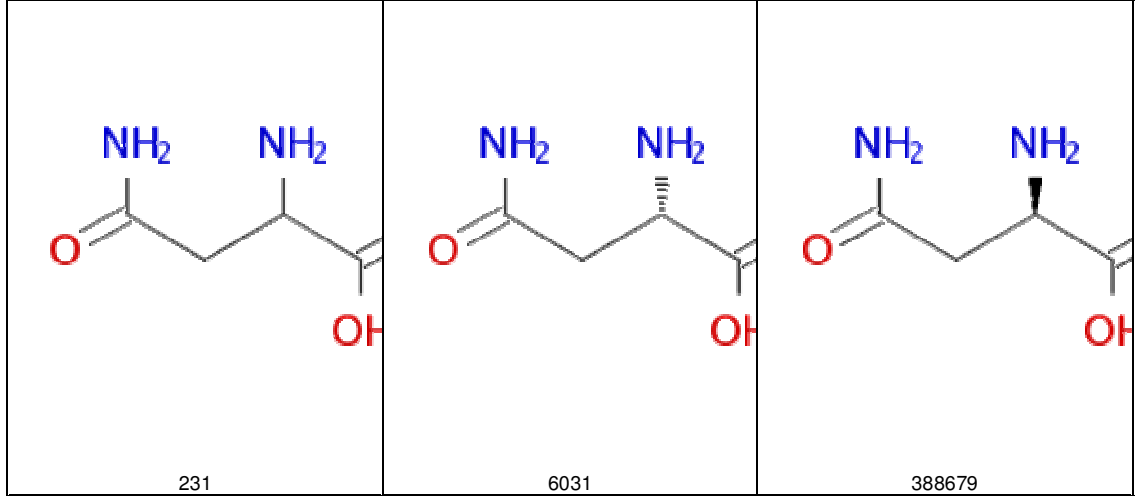

**Name: 2-isopentenyl)-2-methylthioadenosine**

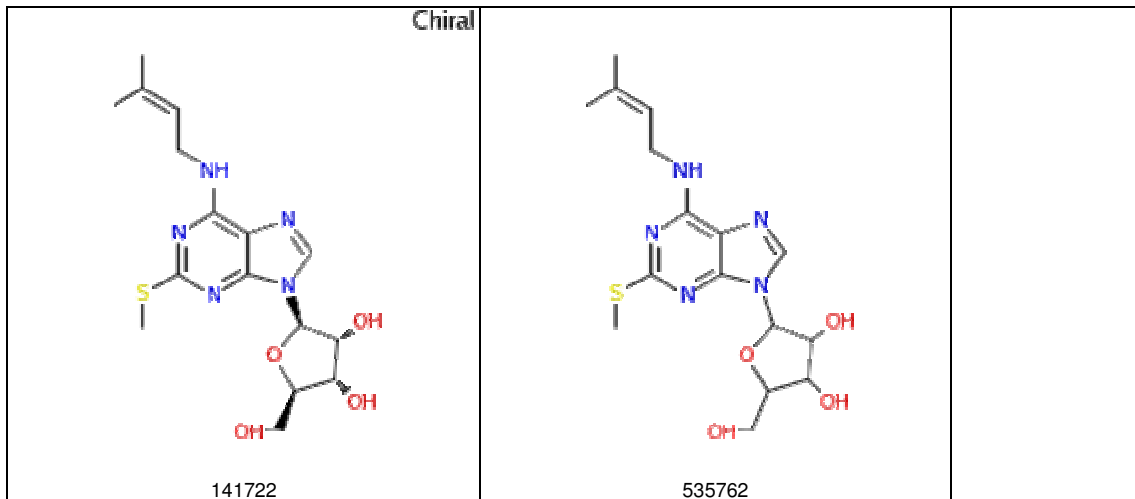

Name: glycosylphosphatidyl inositol

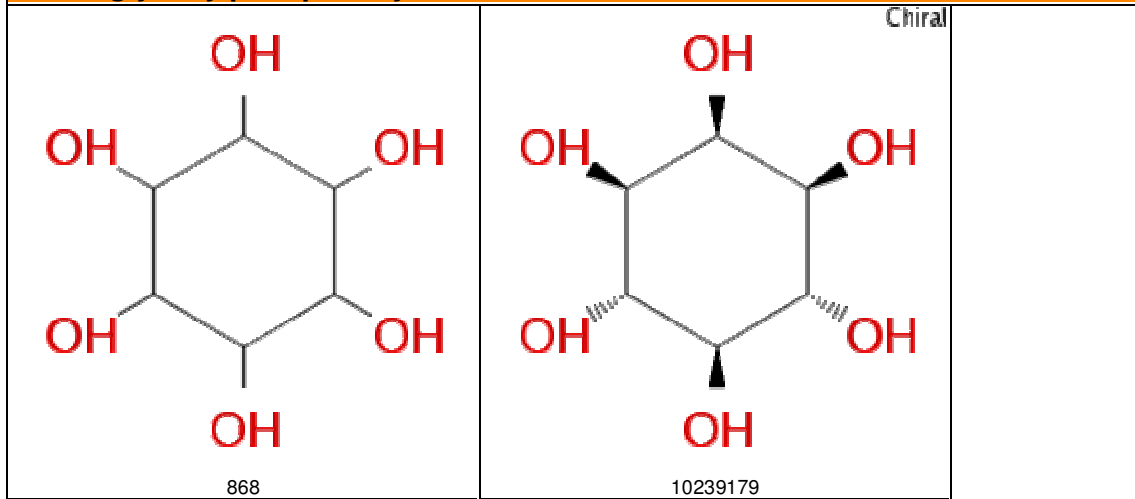

Name: dephosphorylate ceramide 1-phosphate

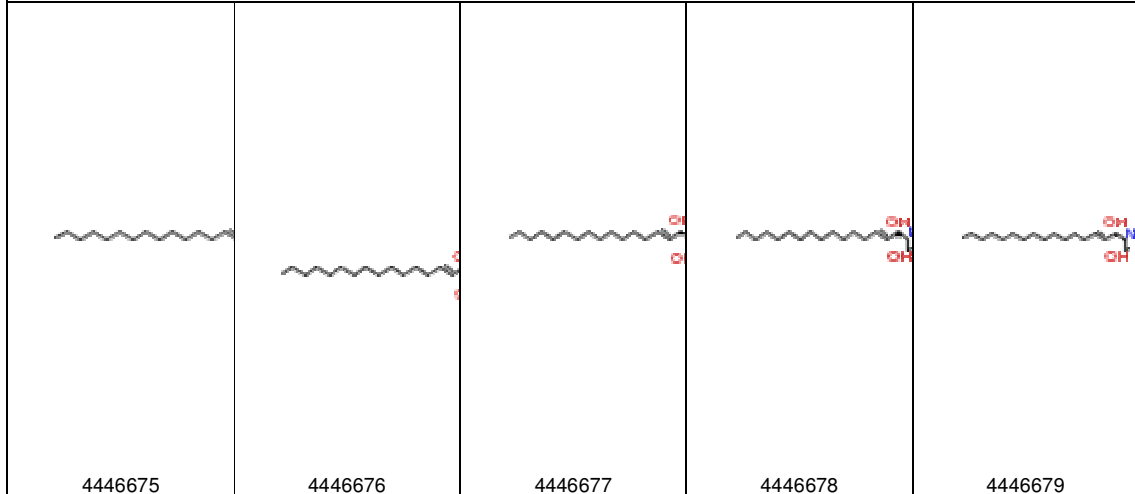

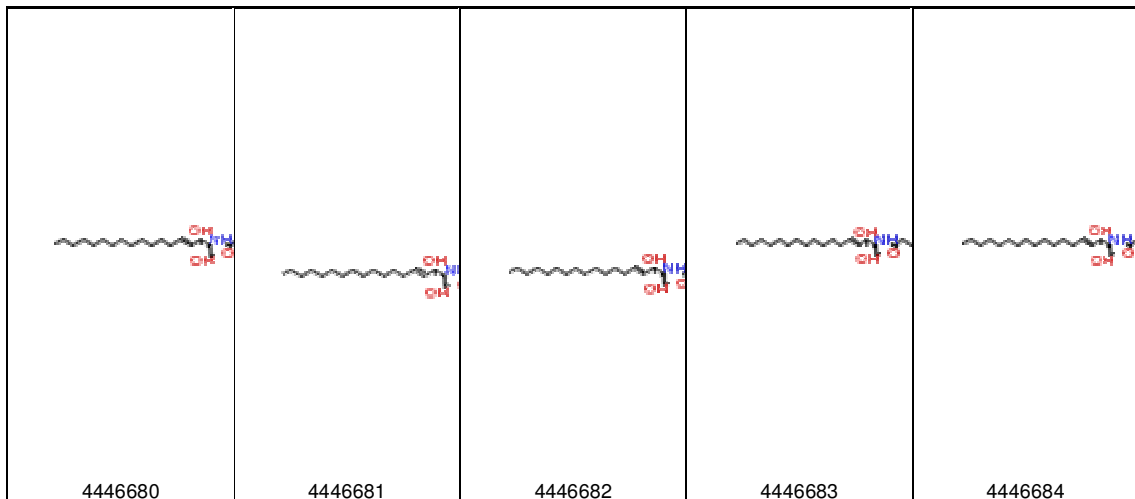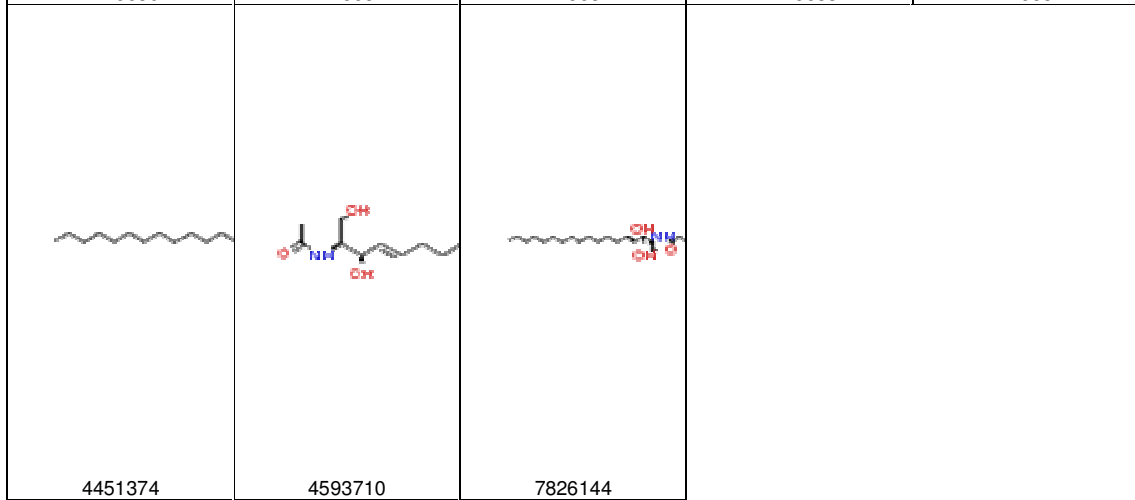

**Name: thymidine-5'-monophosphate**

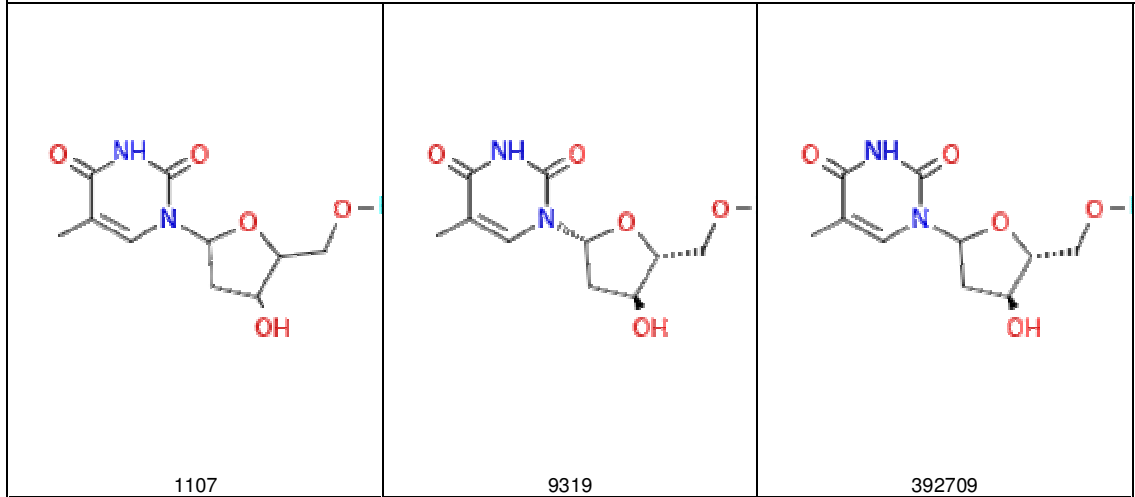

**Name: 1,2-dipalmitoyl-sn-glycerol**



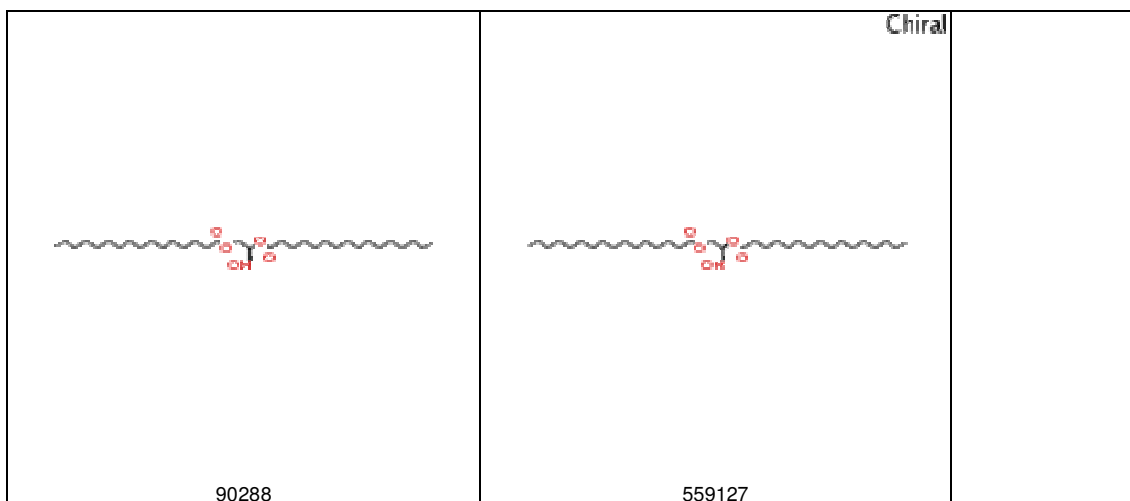

**Name: (S)-(+)-2-butanol**

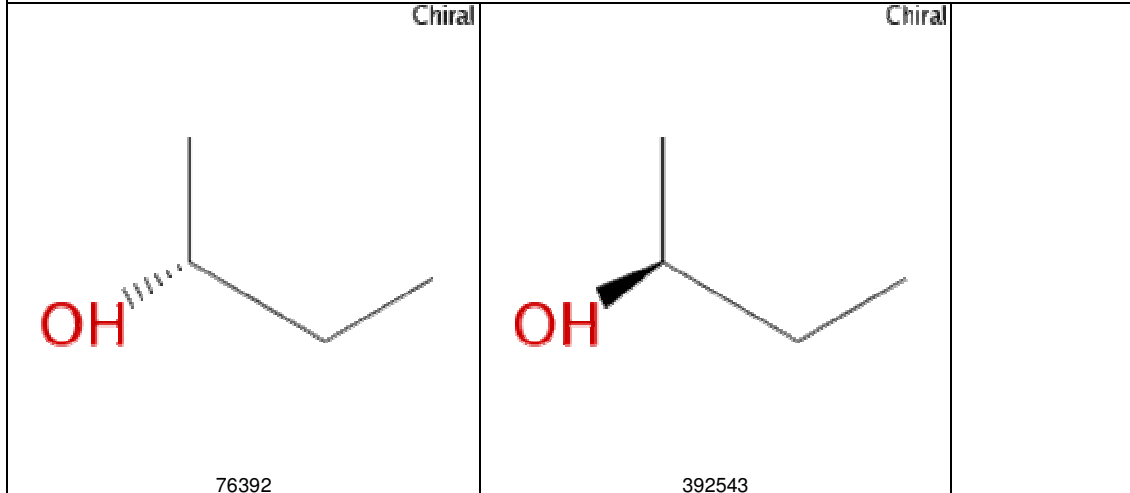

**Name: trichostatin A**

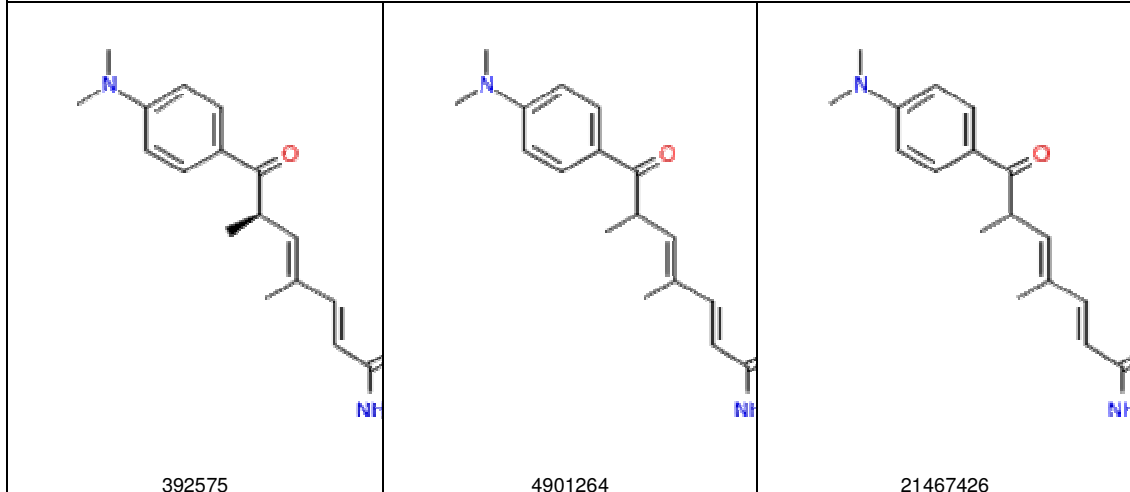

**Name: 7-methyl-GTP**

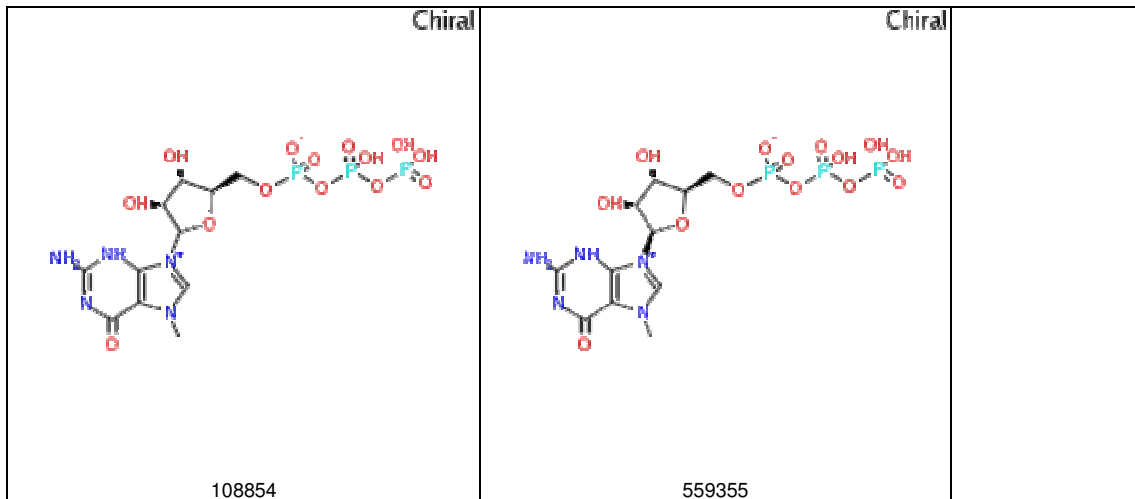

**Name: d-myo-phosphatidylinositol 3-phosphate**

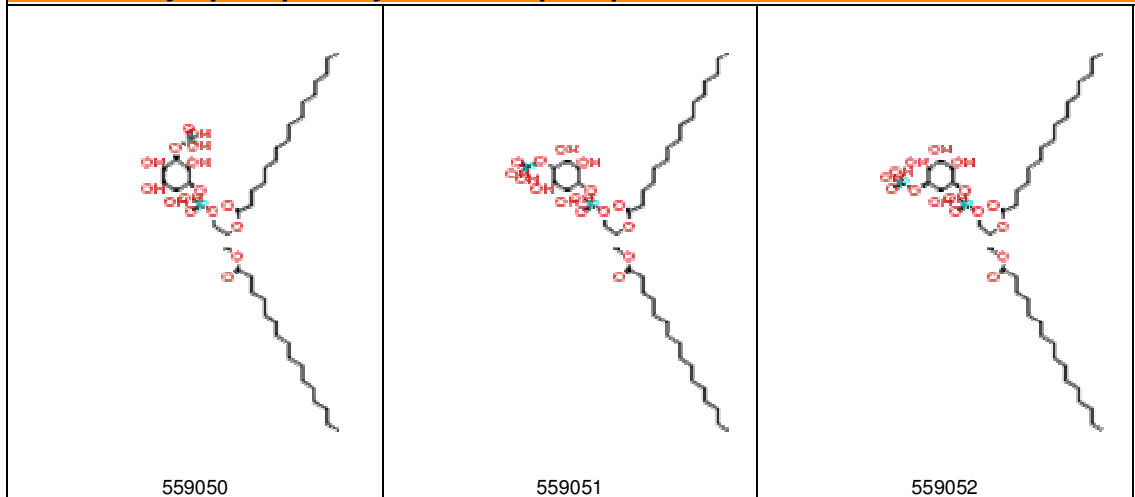

**Name: oleoyl CoA**

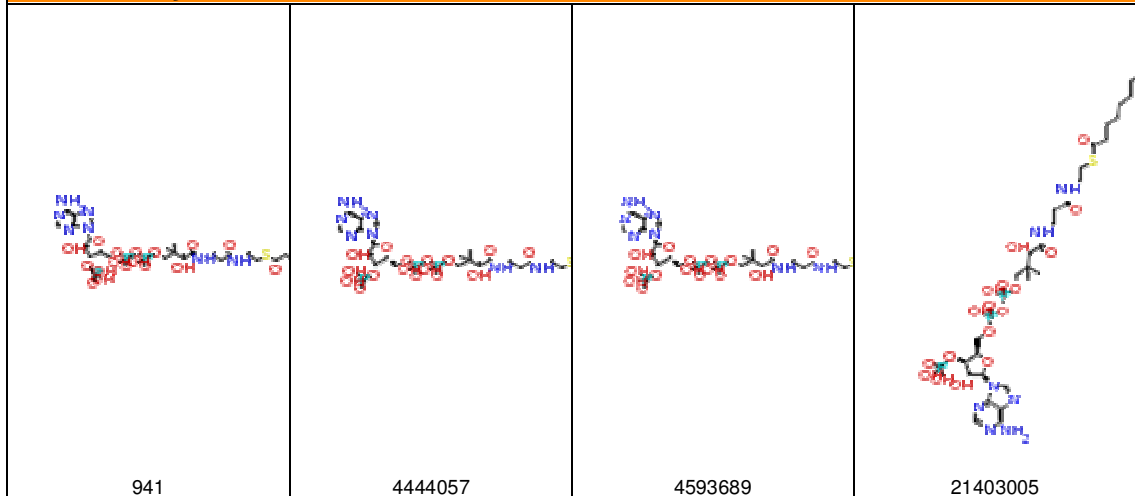

**Name: inositol monophosphate andinositol**

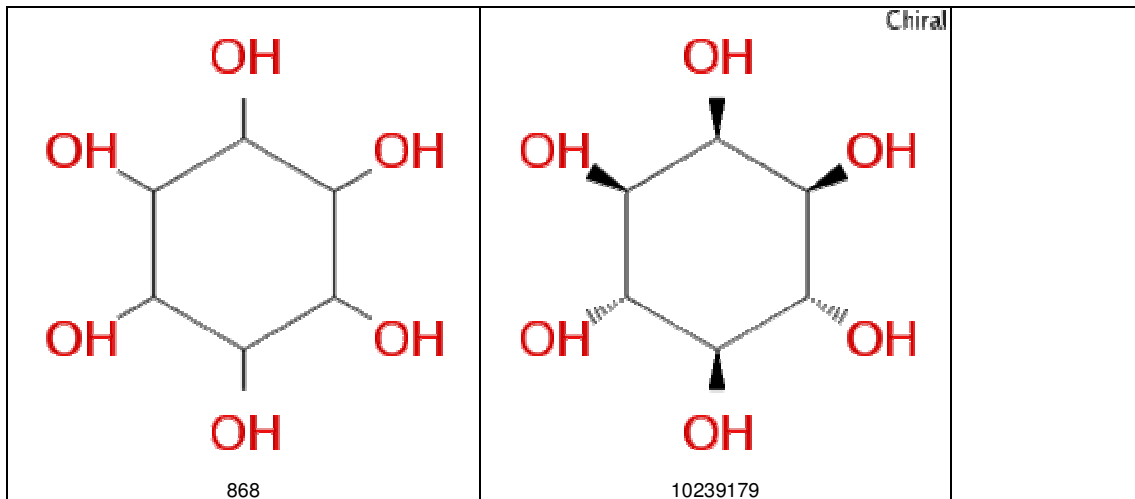

Name: (2R,3R)-3-fluoromalate

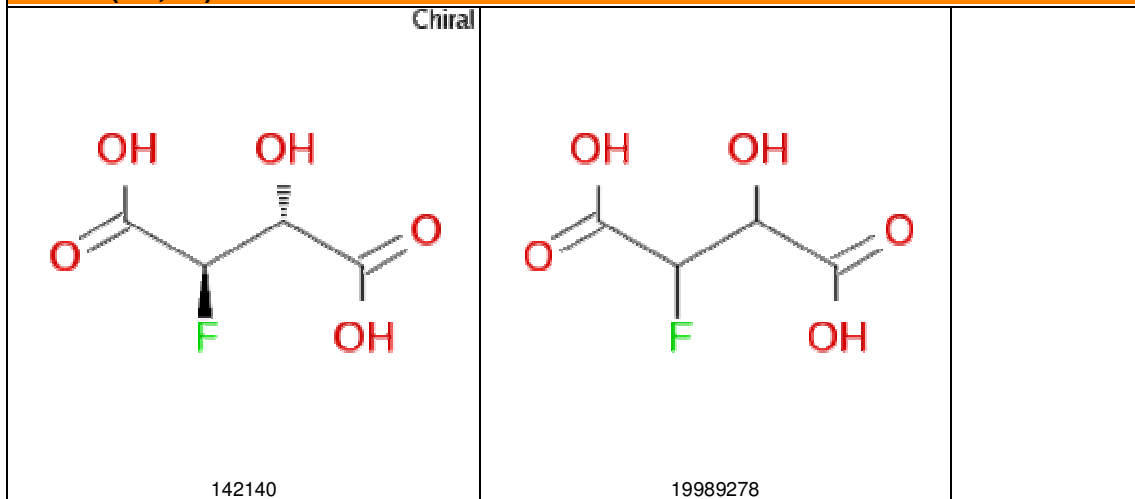

Name: proline analogue L-azetidine-2-carboxylate

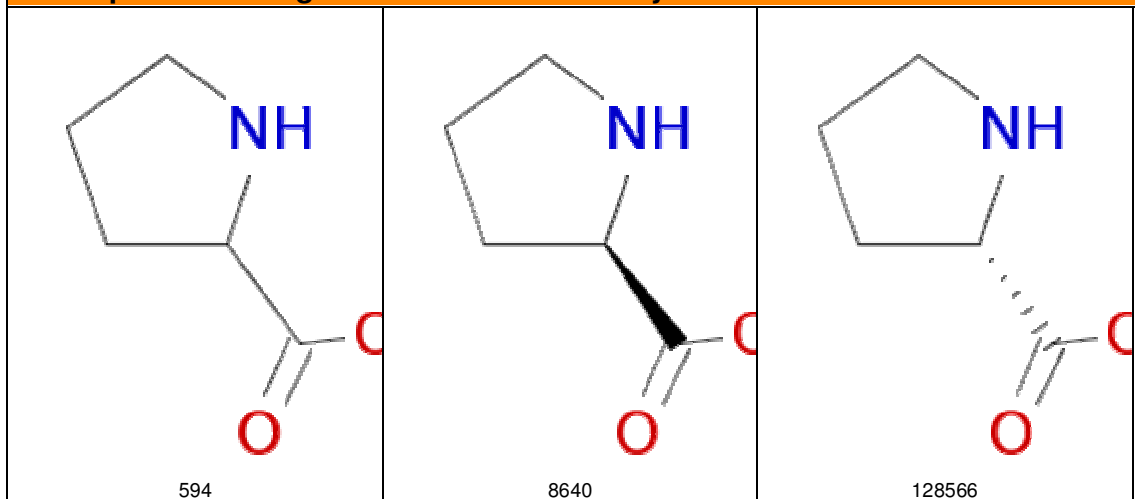

Name: bromodeoxyuridine 5'-triphosphate

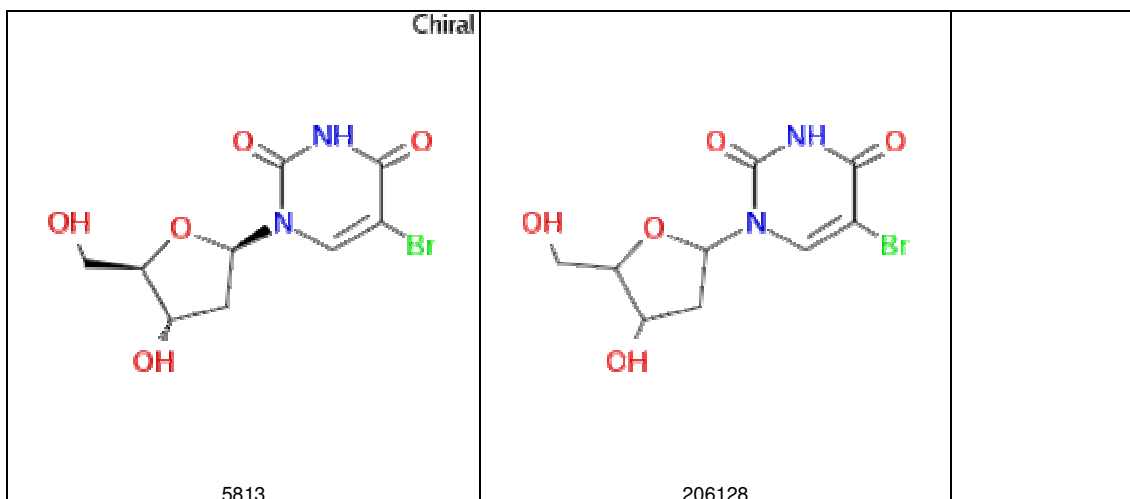

Name: cysteamine hydrochloride

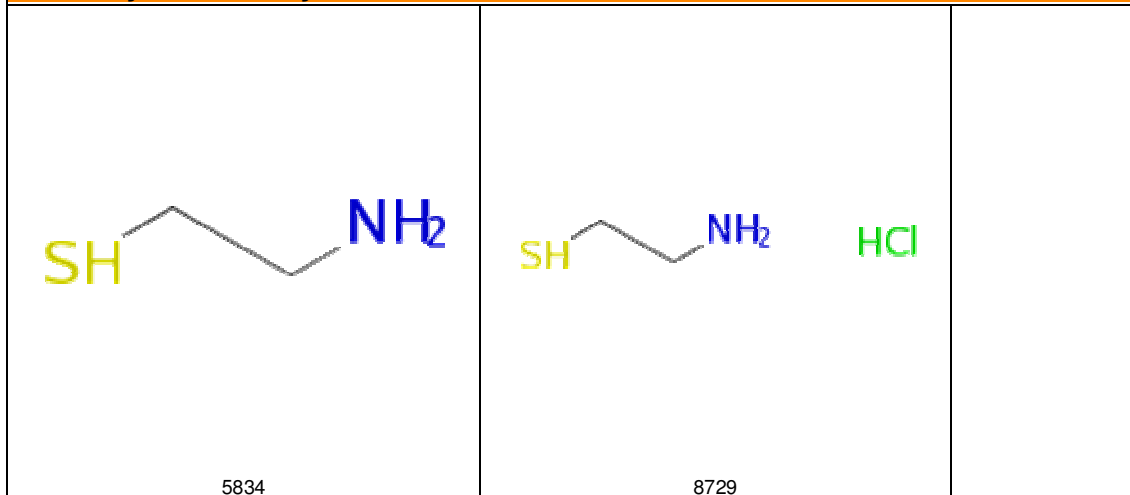

Name: inositol heptakisphosphate

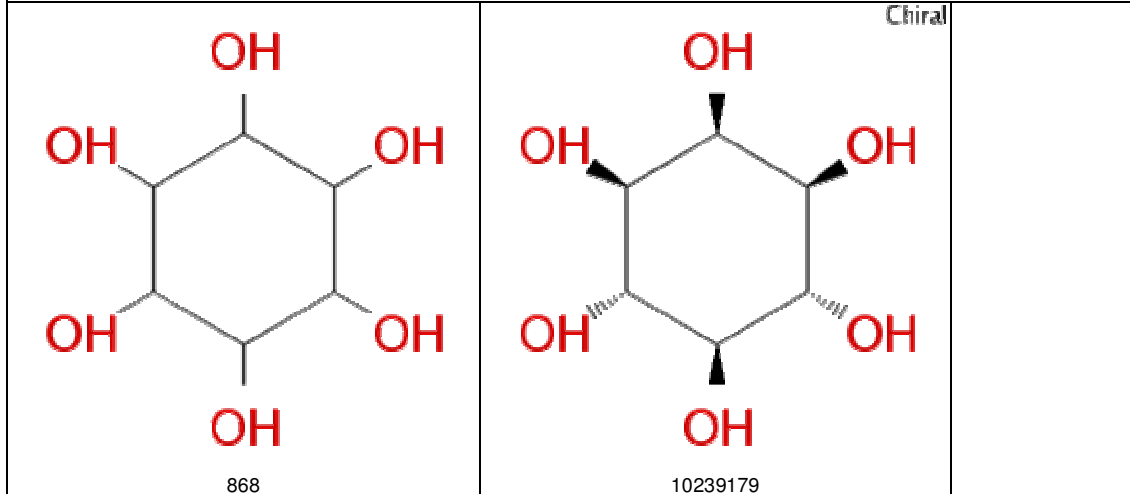

Name: hydrogen selenide(H(2)Se)

HH

762

H

4515072

**Name: indole-3-glycerol phosphate**

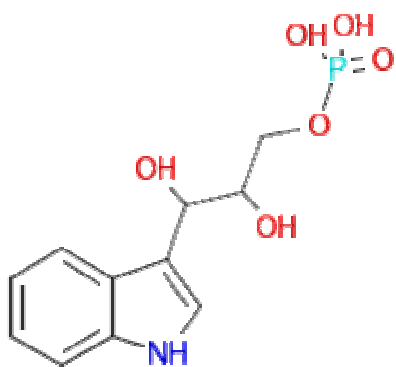

777

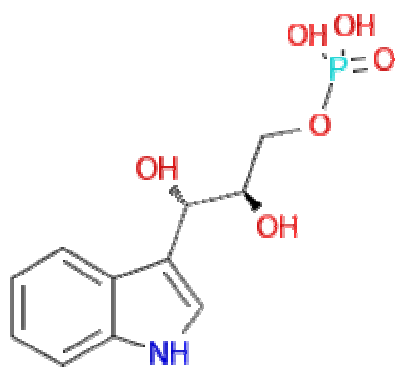

392148

Chiral

**Name: bornyl acetate**

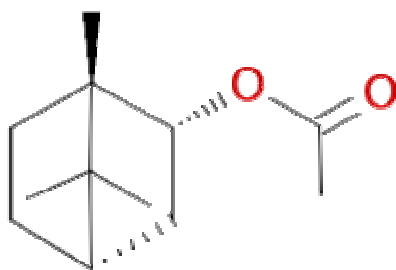

83962

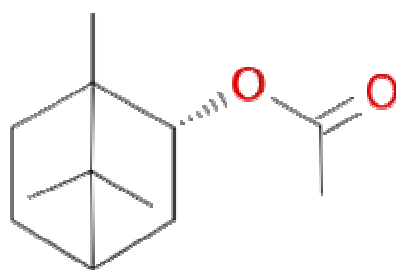

390898

Chiral

Chiral

**Name: inositol metabolites**



**Name: glucose-6-P**

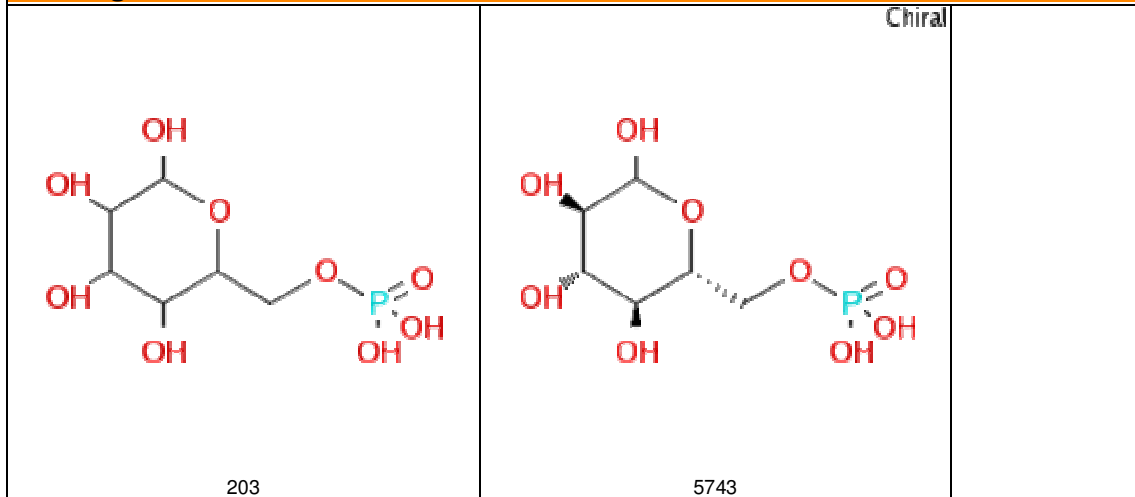

**Name: thiophenyl malonate**

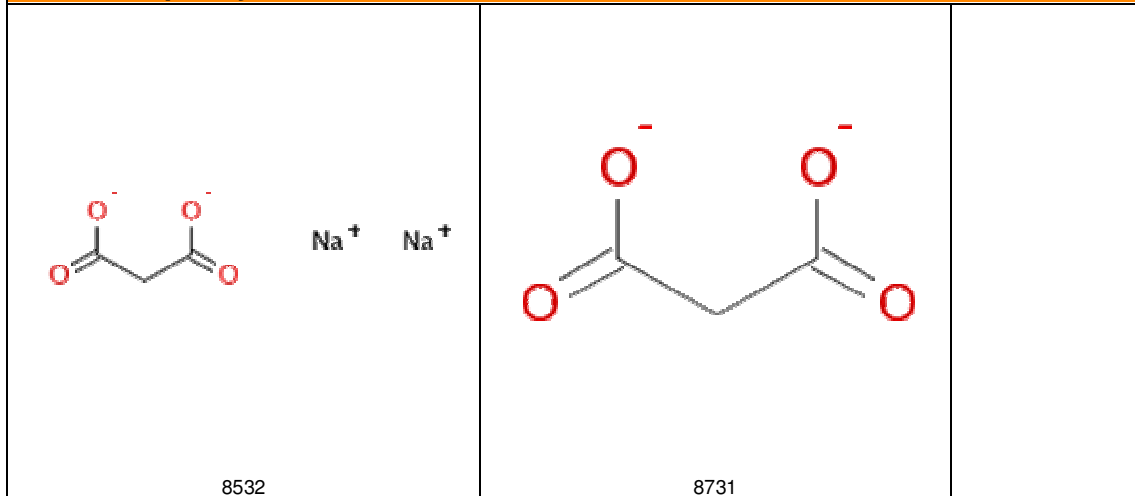

**Name: inositol phosphorylceramide**



**Name: inositol phosphoceramide**

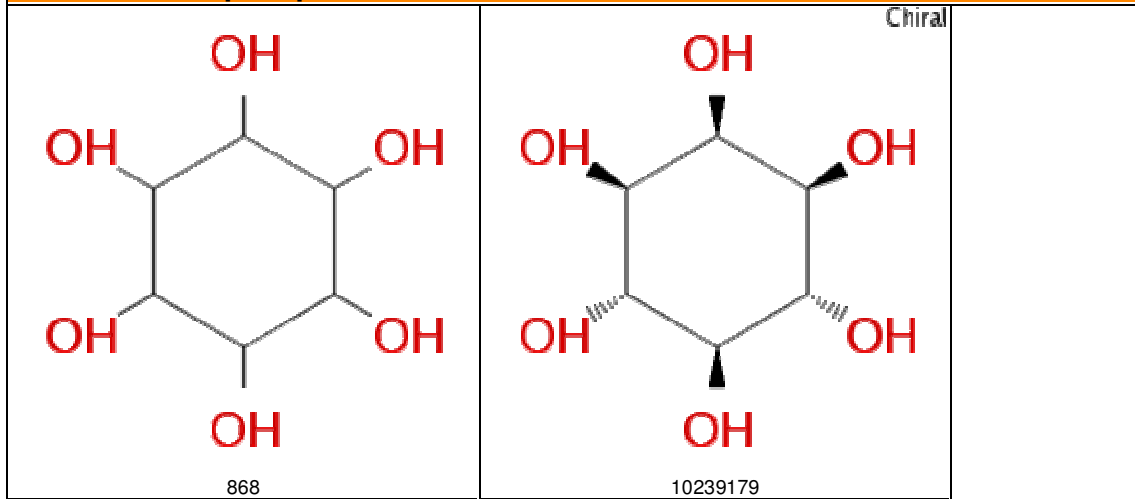

**Name: cytidine diphosphate-diacylglycerol**

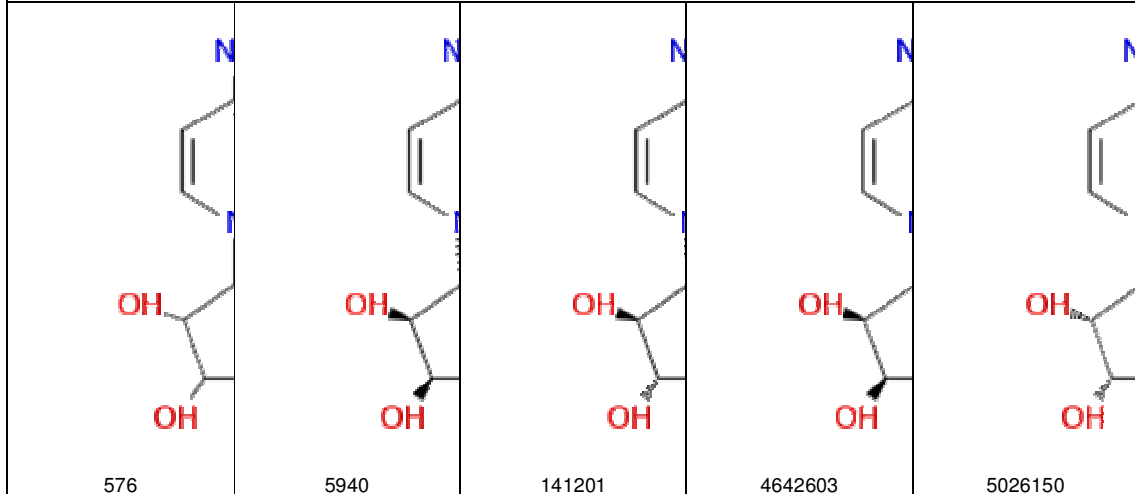

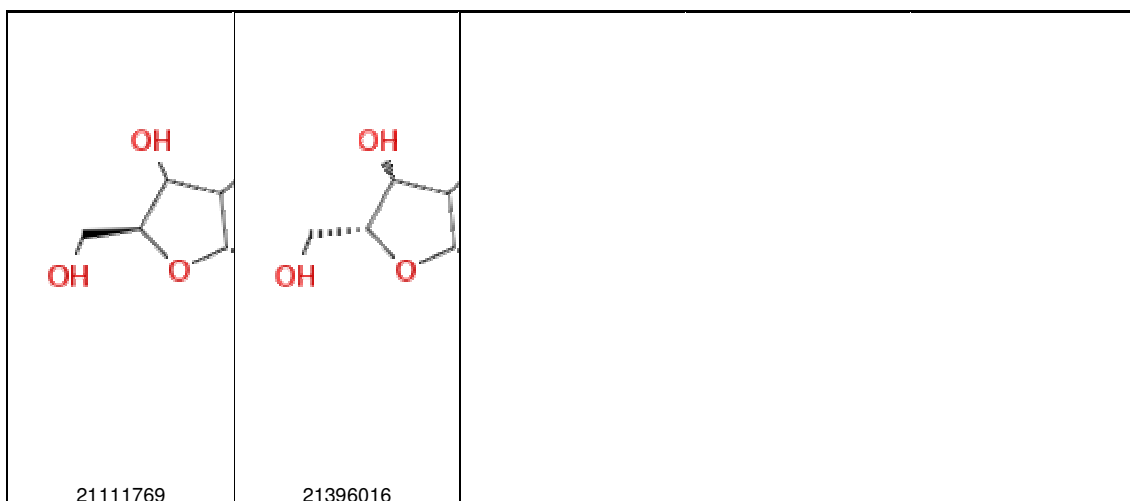

**Name: diethyl maleate**

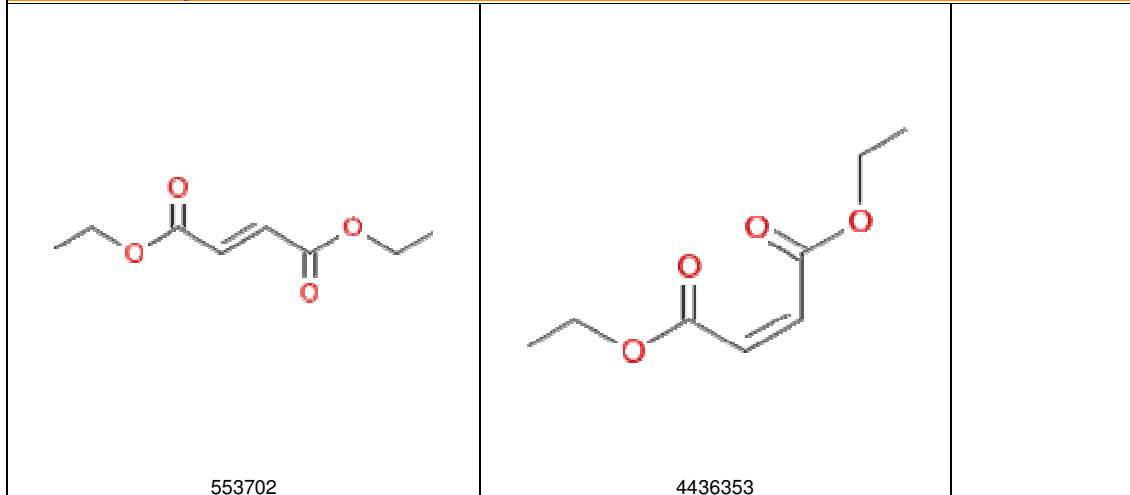

**Name: lysine nitrilotriacetic acid**

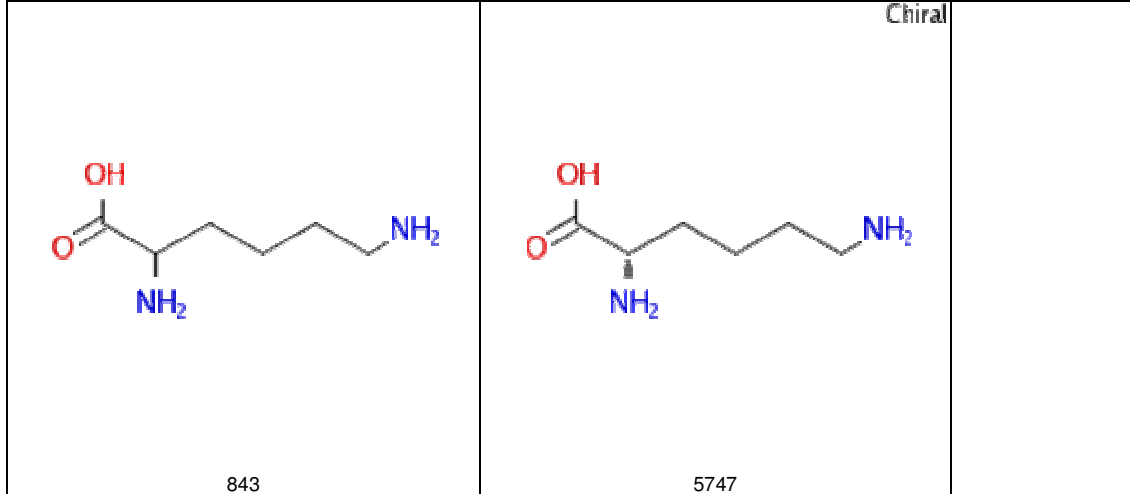

**Name: tritiated inositol**





**Name: N'-[1-(2-pyridyl)ethylidene]morpholine-4-carbothiohydrazide**

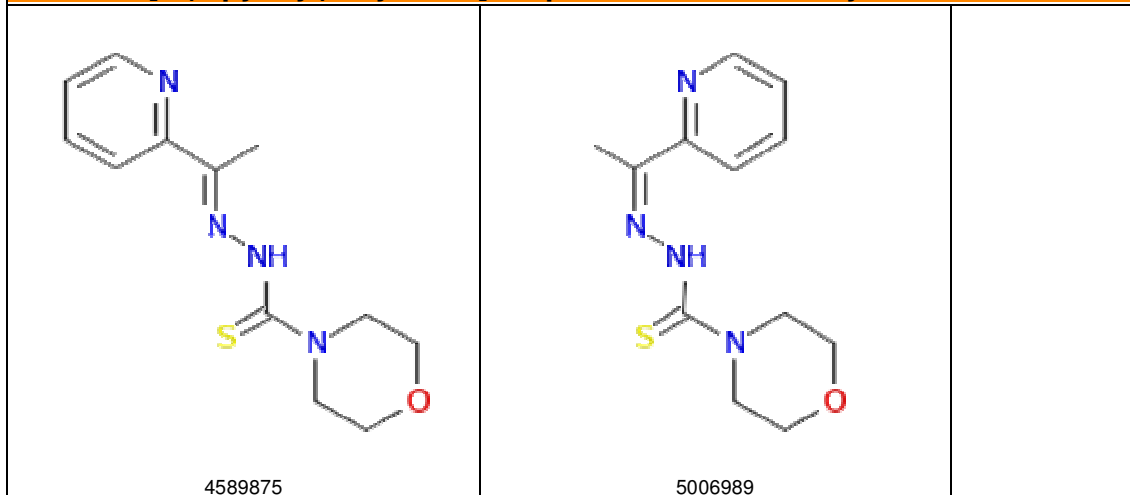

**Name: lysophosphatidic acid**

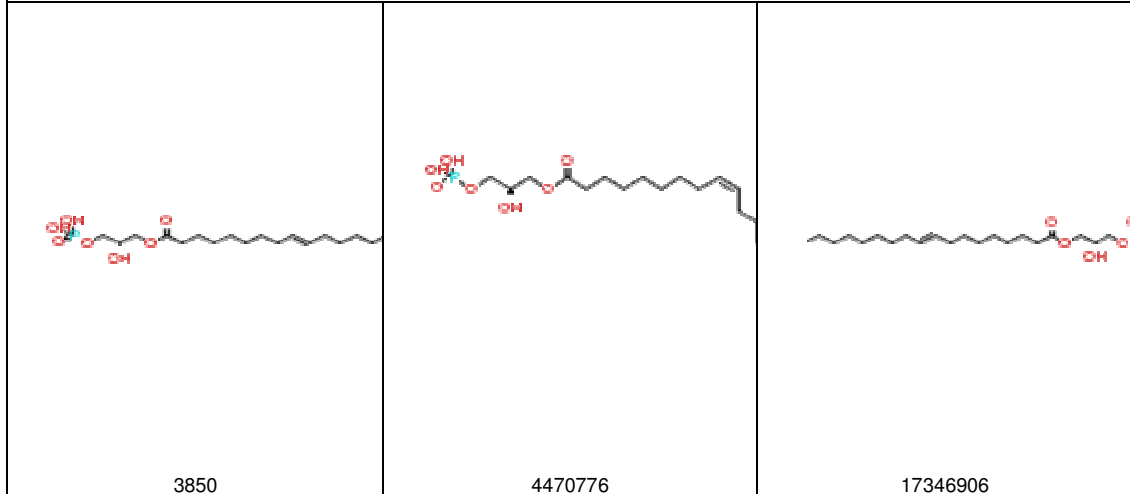

**Name: artemisinic acid**

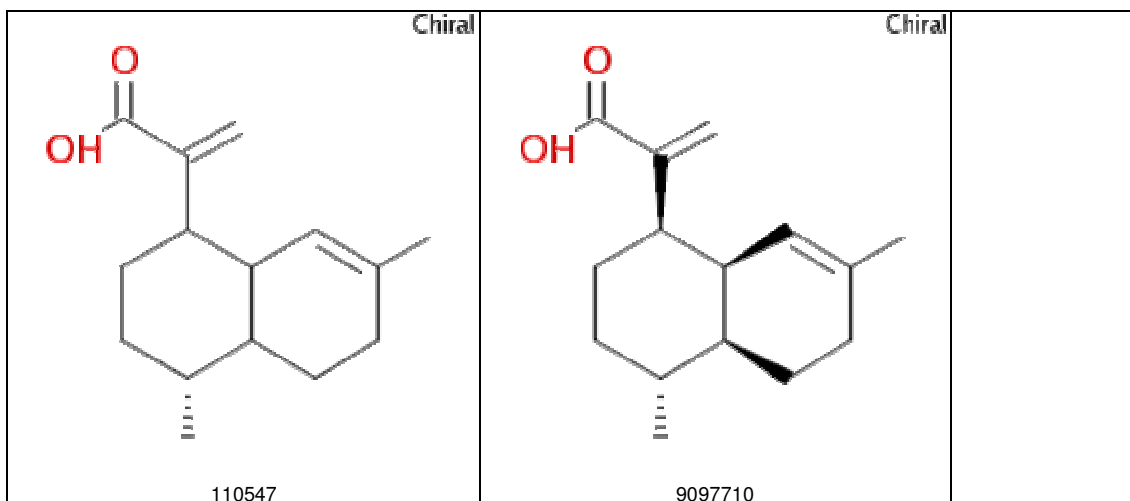

**Name: ricinoleic acid**

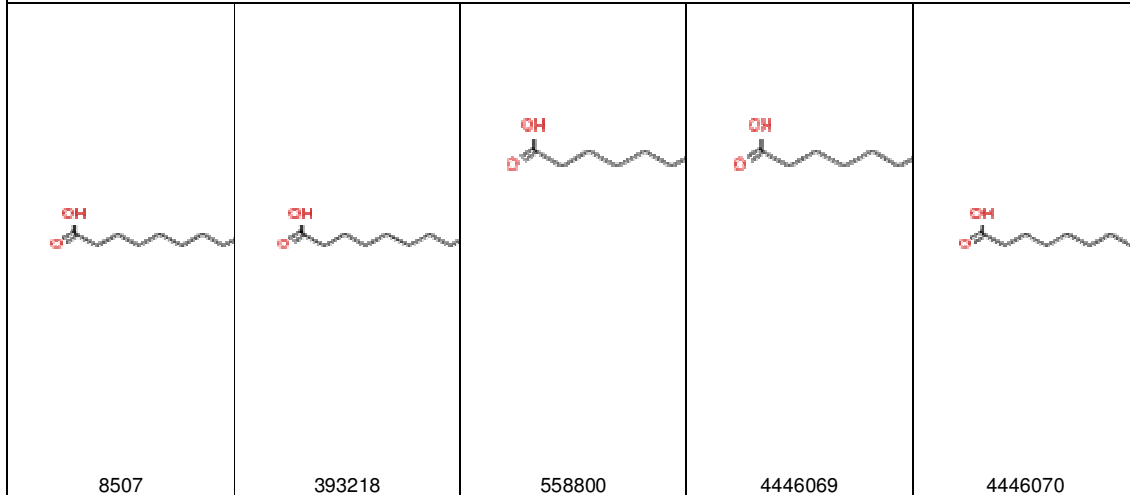

**Name: reveromycin A**

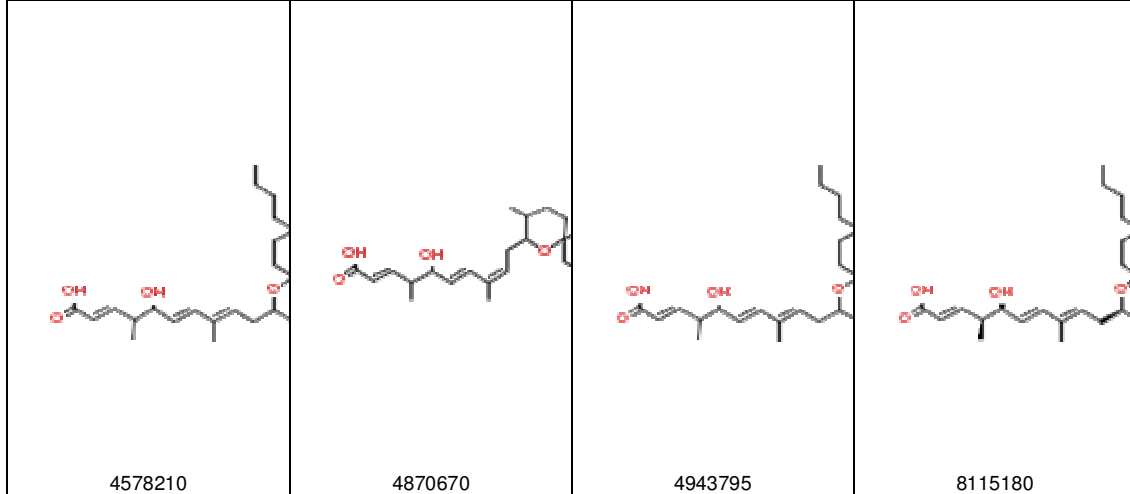

**Name: adenylate nucleotide**

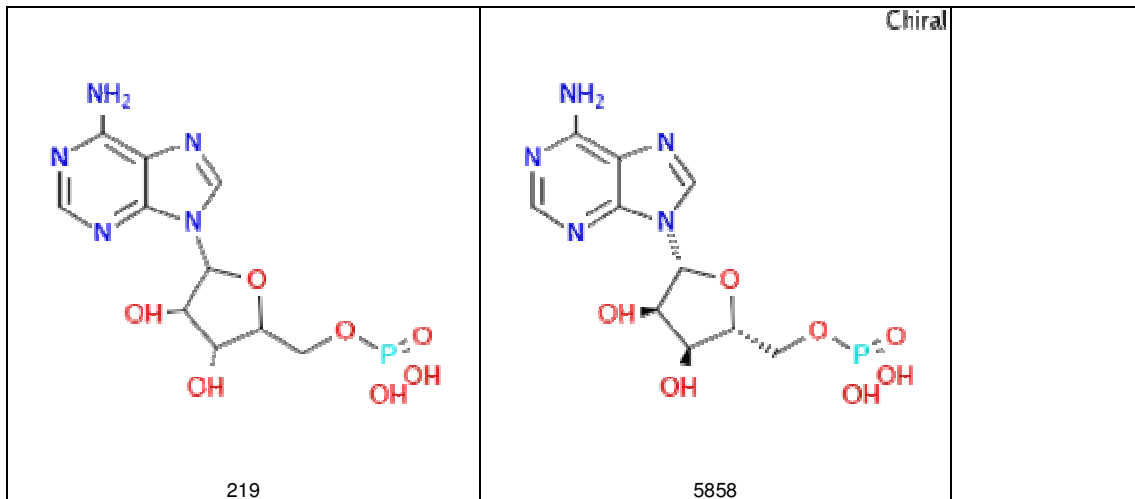

Name: sorafenib A

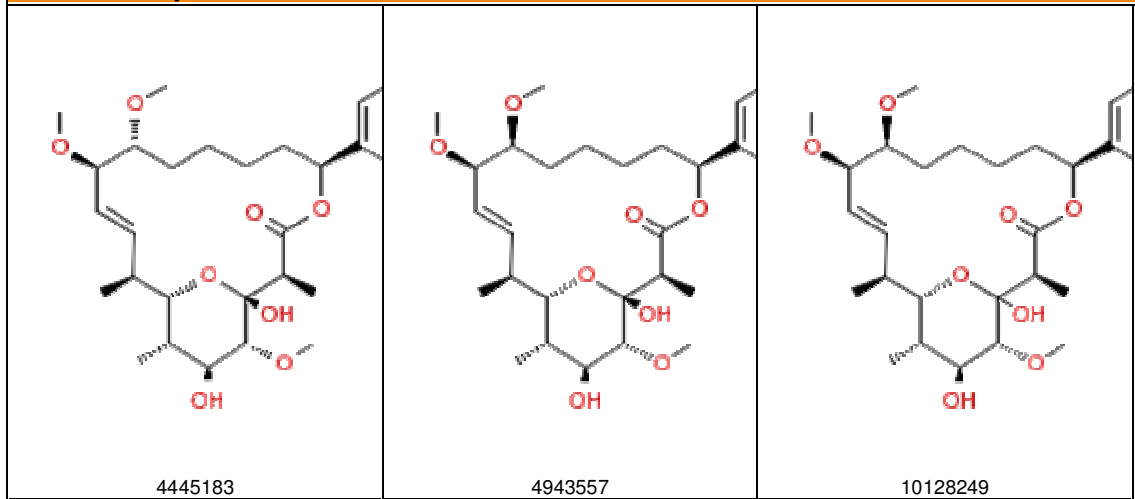

Name: biotin-accepting lysine

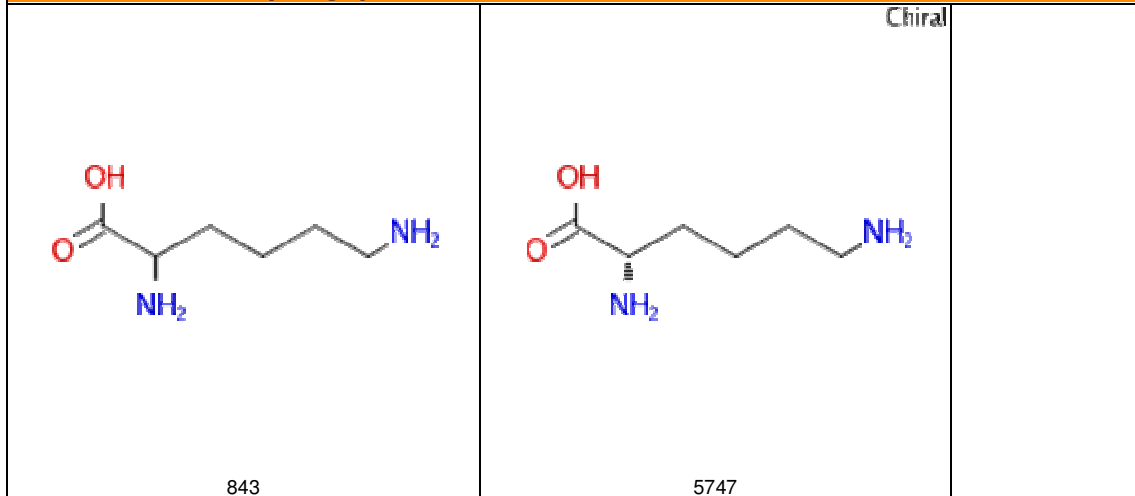

Name: Phosphatidyl ethanolamine

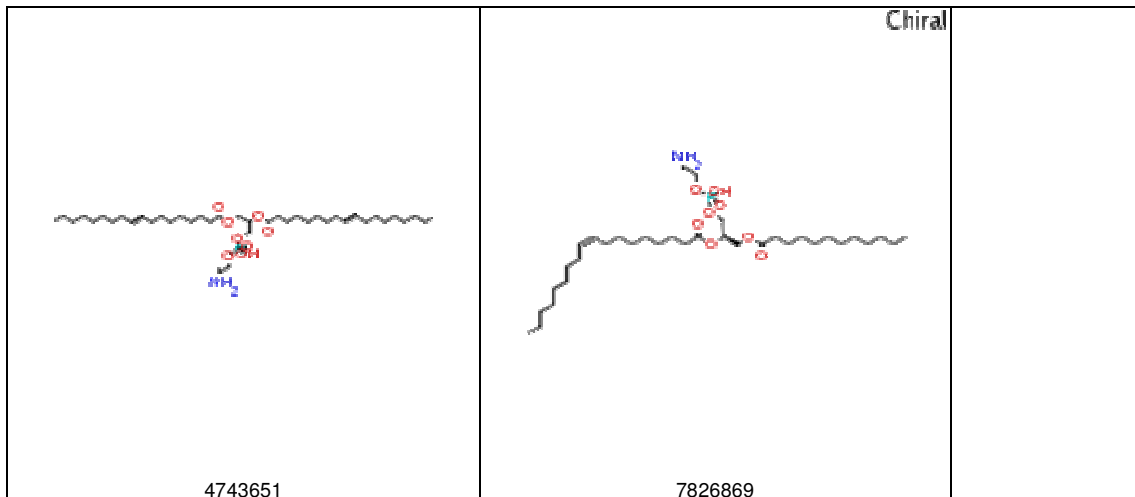

**Name: adenosine triphosphate-pyrophosphate**

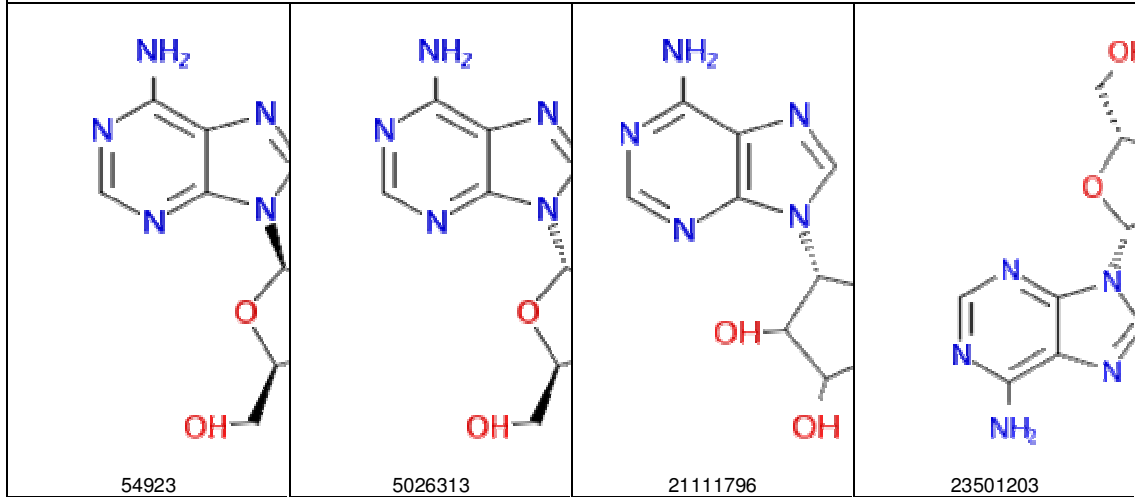

**Name: cephalosporin C**

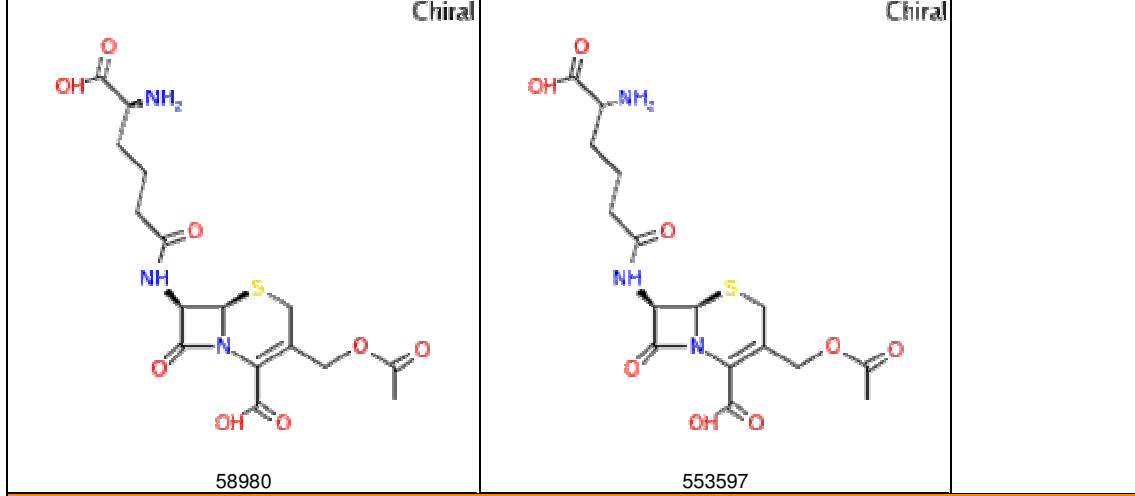

**Name: galactose-1-P**

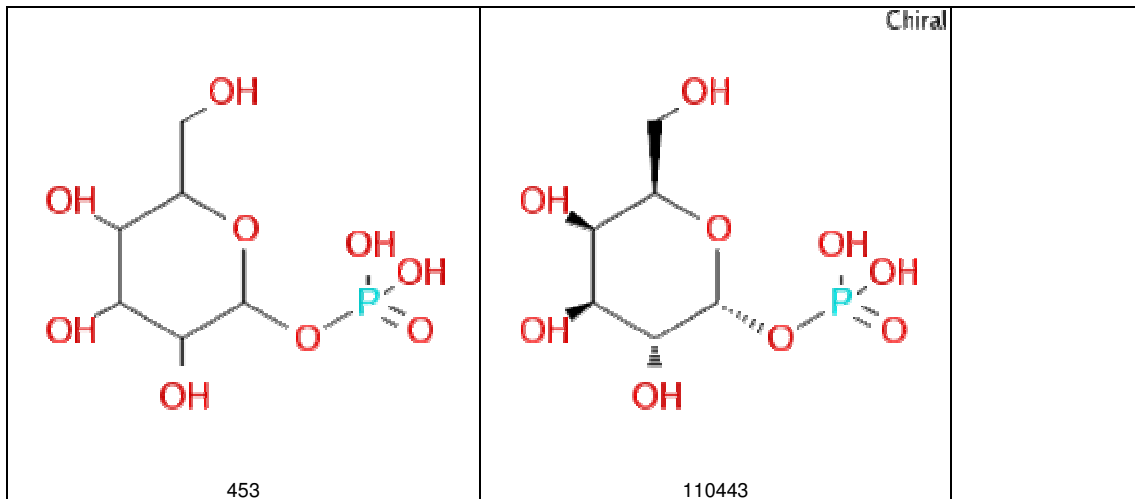

**Name: 1-palmitoyl,2-oleoyl-sn-glycero-3-phosphocholine**

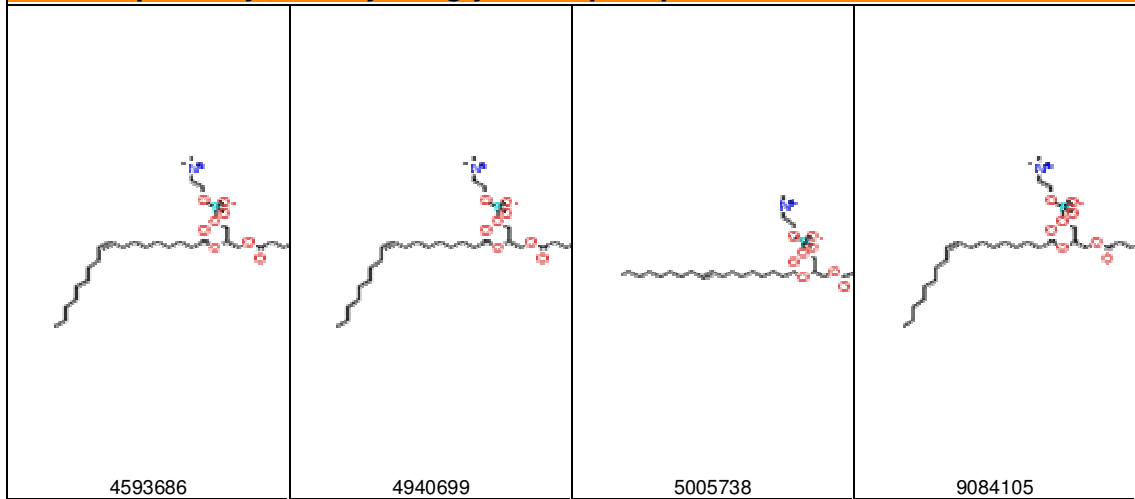

**Name: degrade lysine**

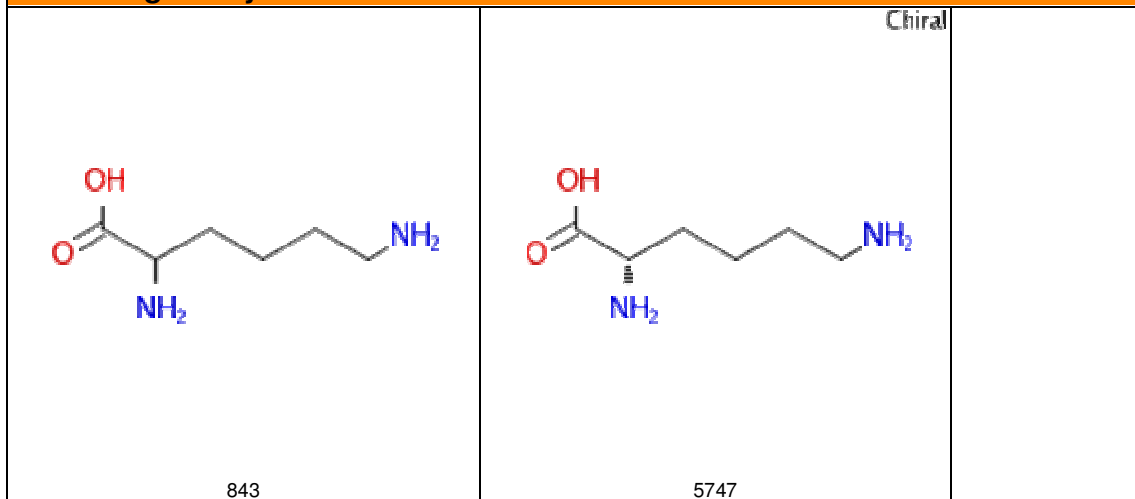

**Name: dithiothreitol**

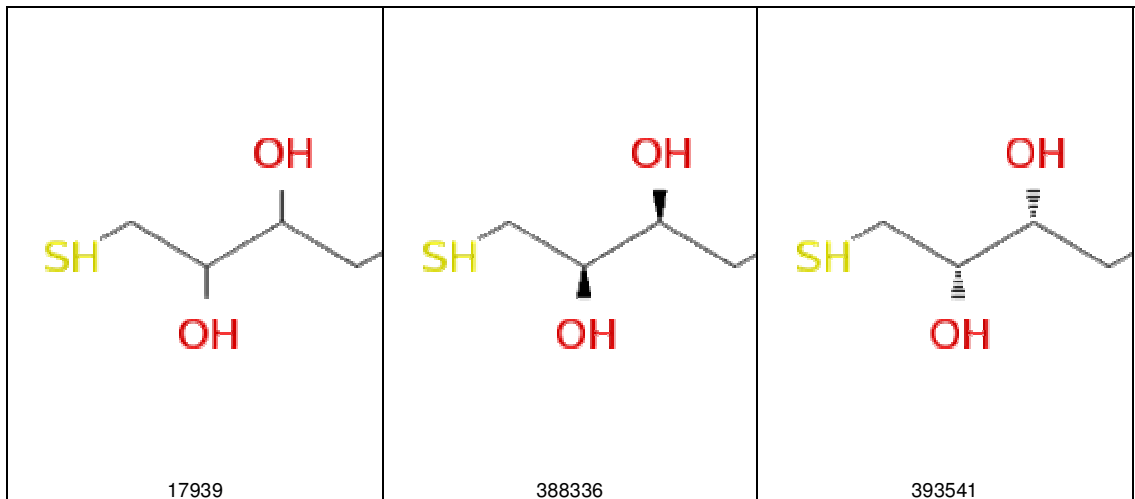

**Name: alpha-tocopherol acetate**

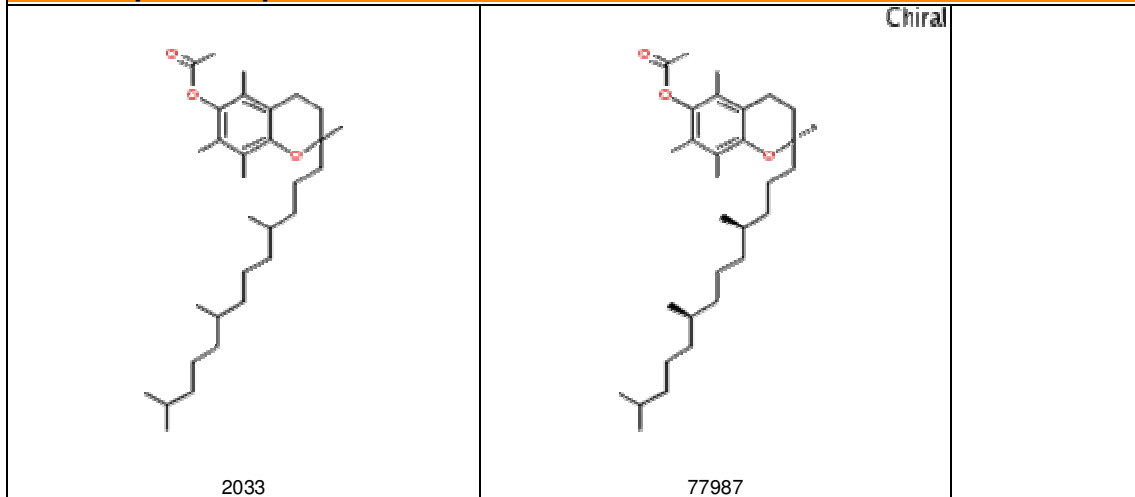

**Name: beta-cholestanol**

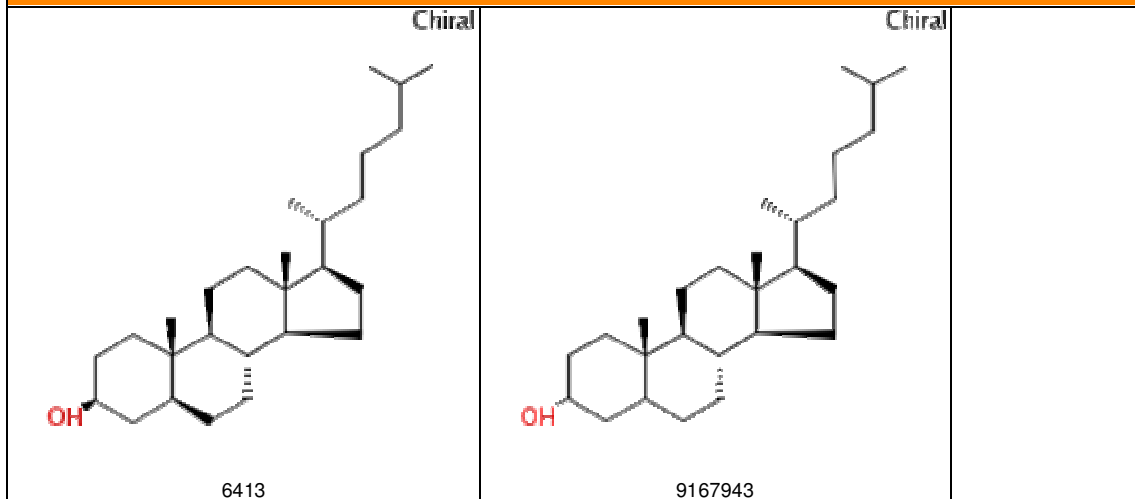

**Name: guanosine 5'-(3-O-thio)triphosphate**

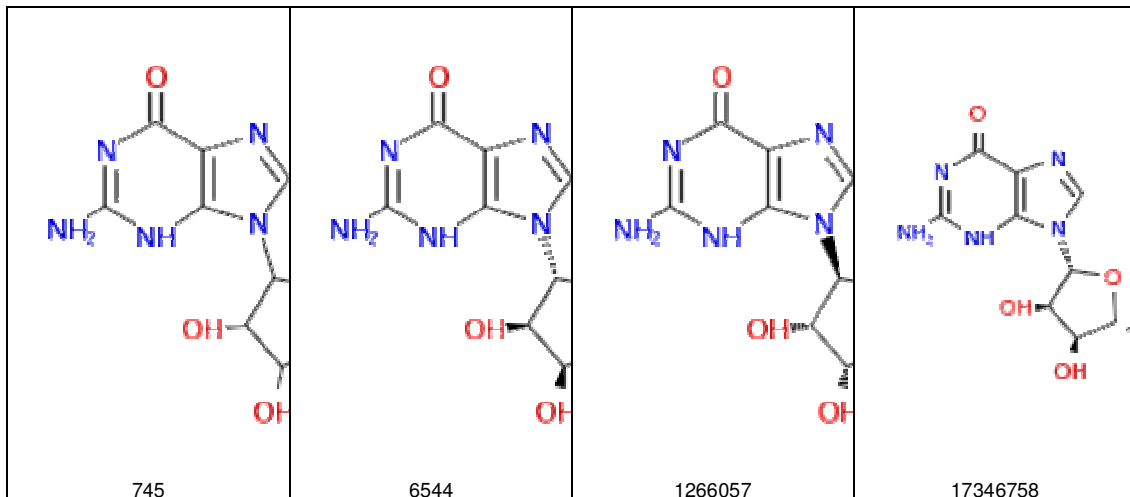

**Name: sulfane sulfur**

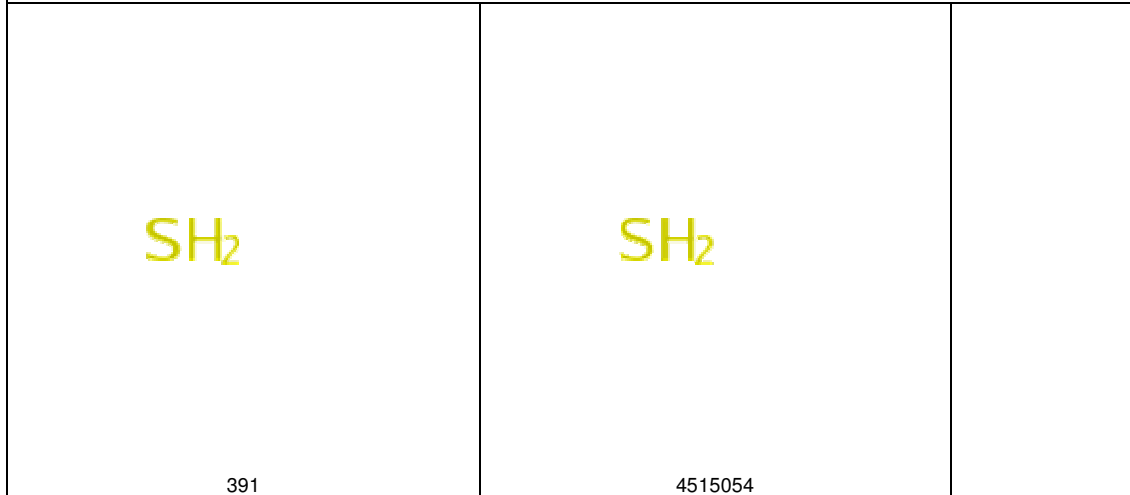

**Name: Concanamycin A**

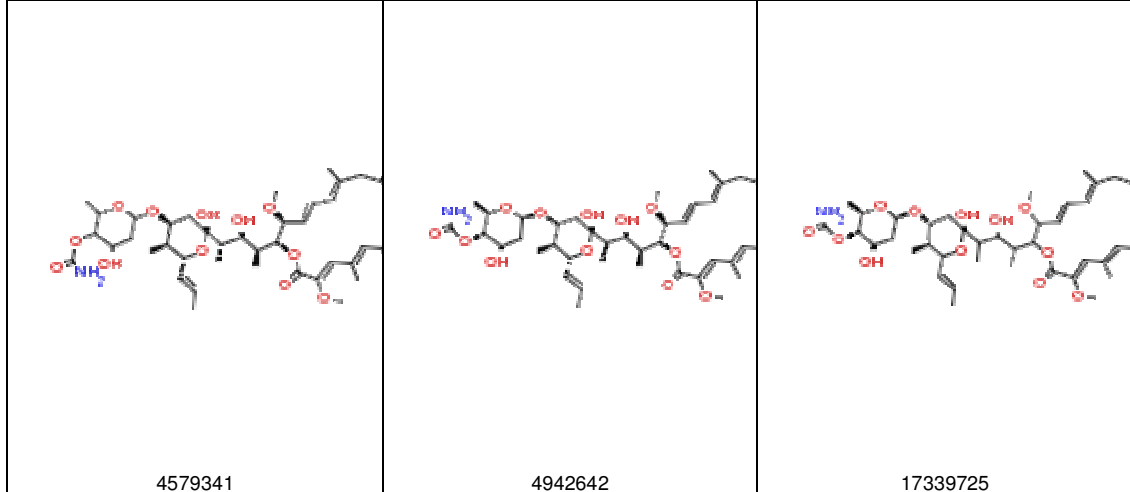

**Name: adenosine-5'-triphosphate**

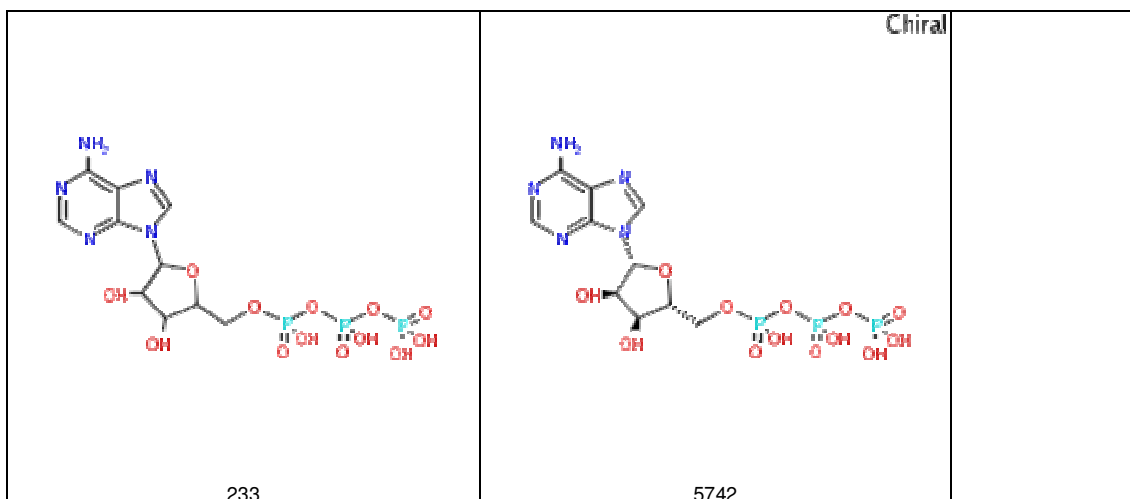

**Name: proline-cysteine**

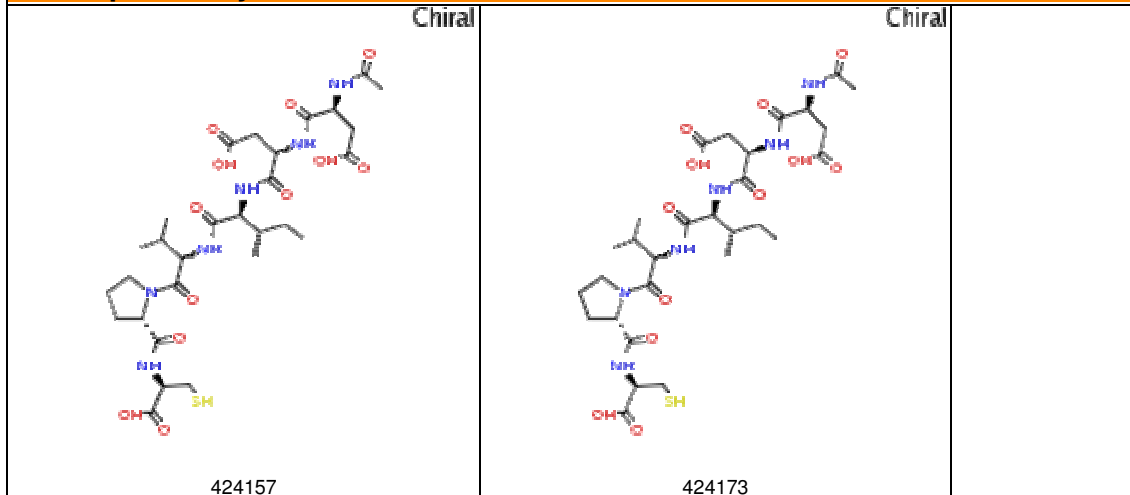

**Name: S-dinitrophenyl glutathione**

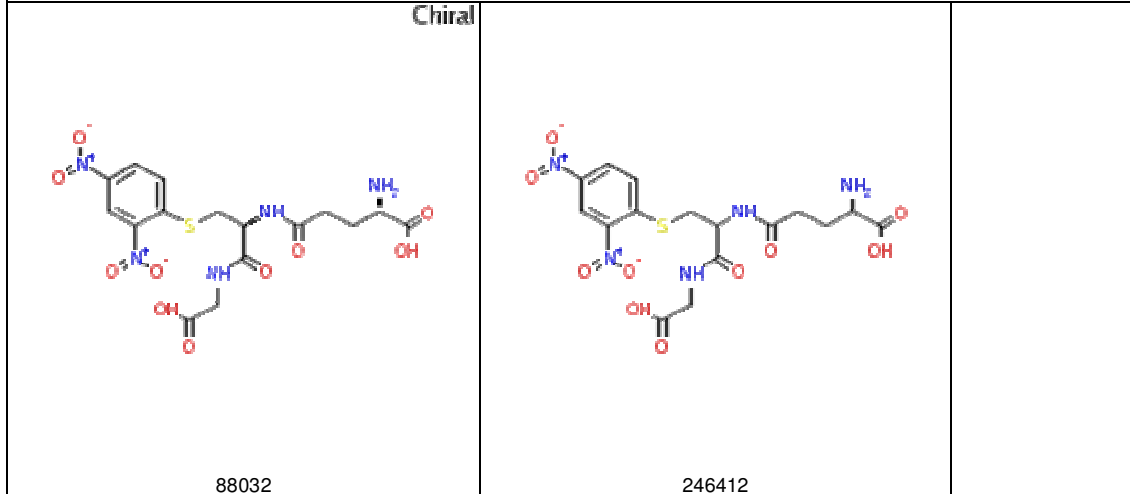

**Name: 3-fluoromalate**



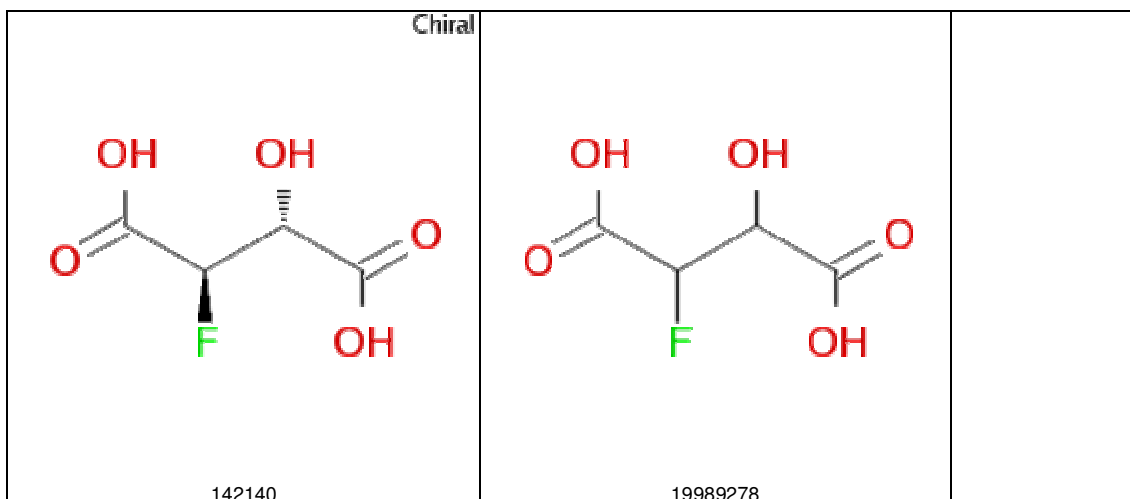

**Name: homoserine lactone**

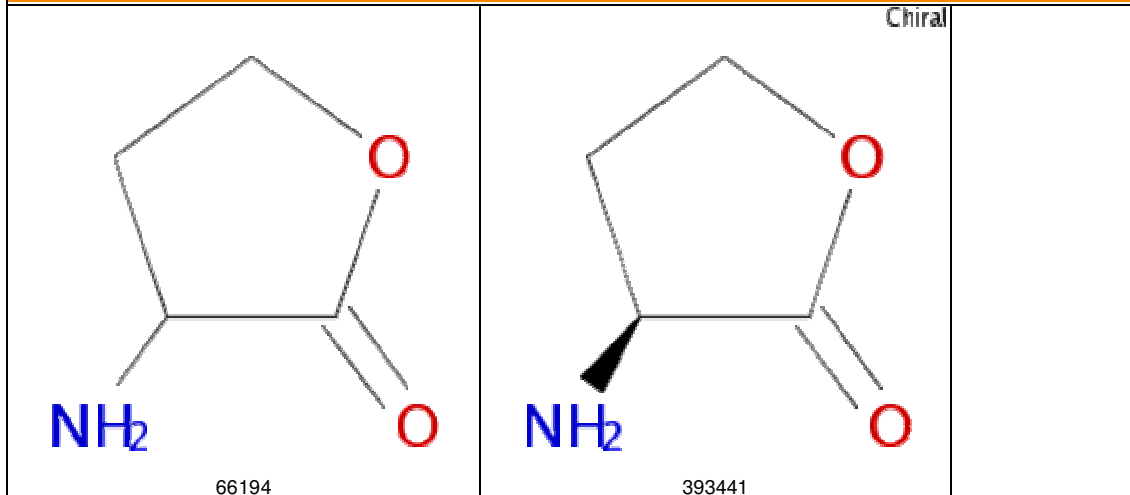

**Name: aureobasidin A**

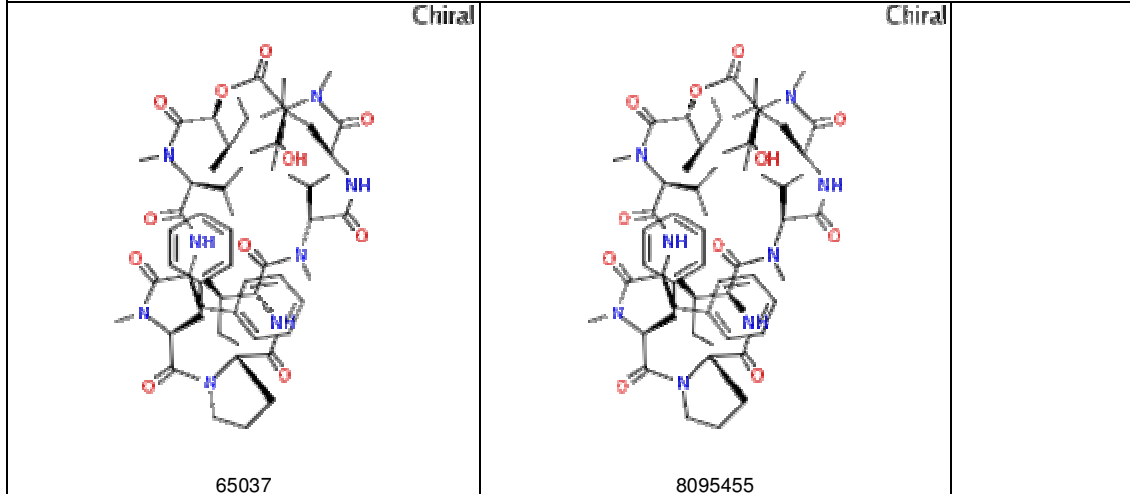

**Name: dihydroorotic acid**

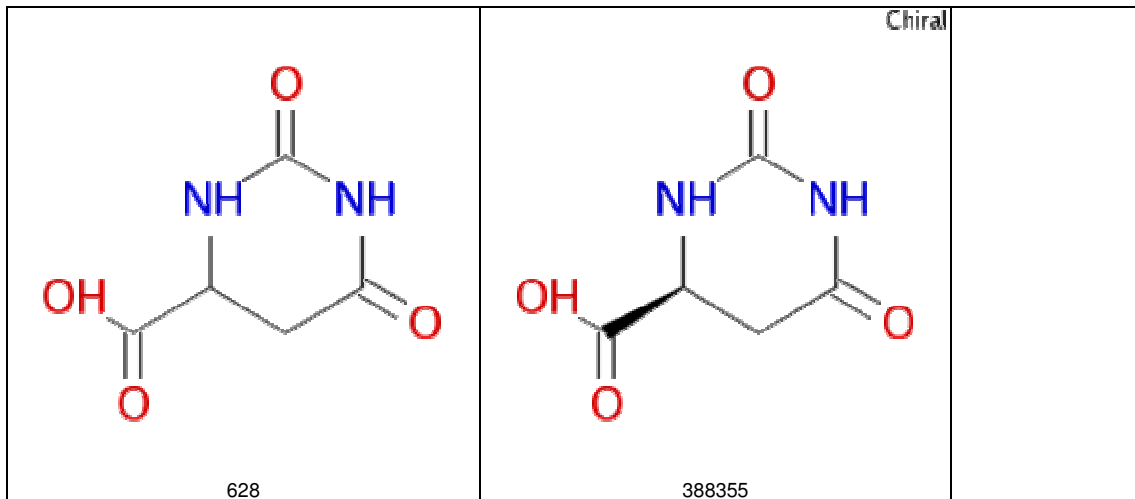

Name: adenosine 5'-hexadecylphosphate

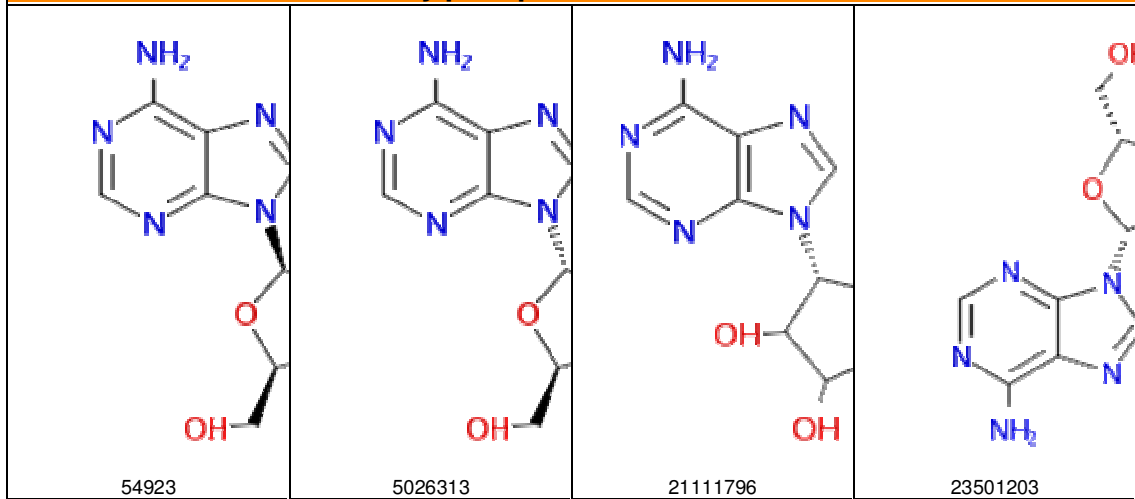

Name: 4-thiouridine

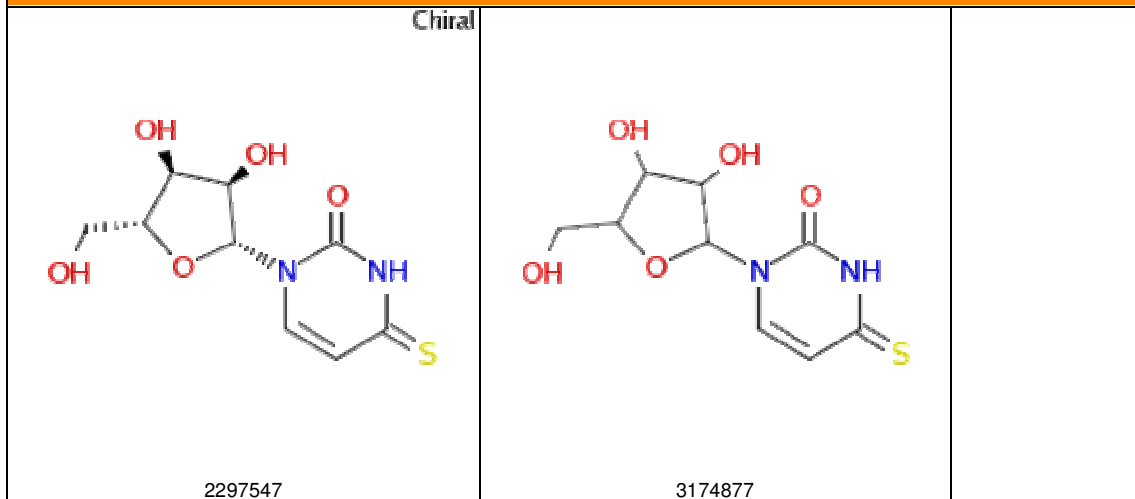

Name: thiamin antimetabolites

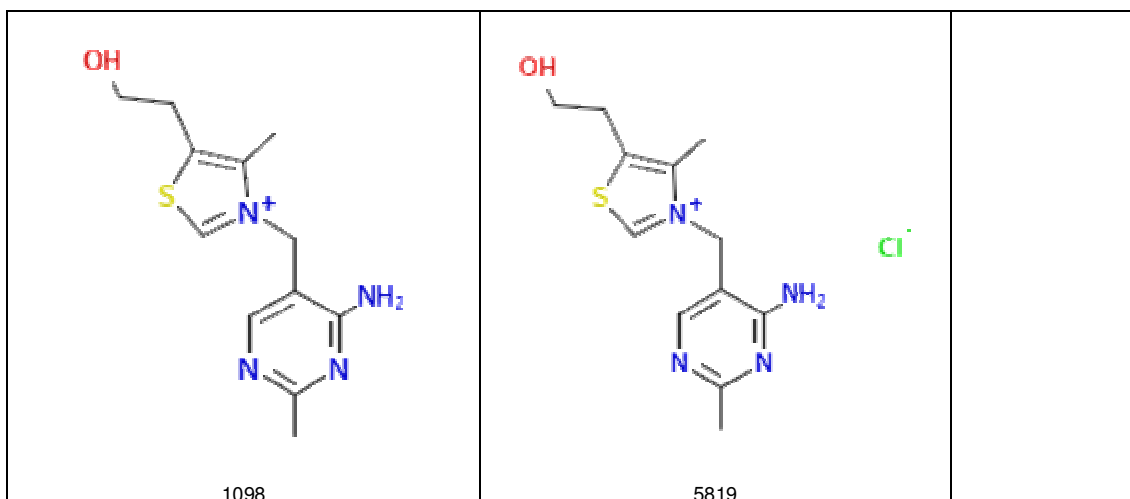

**Name: aryl azide**

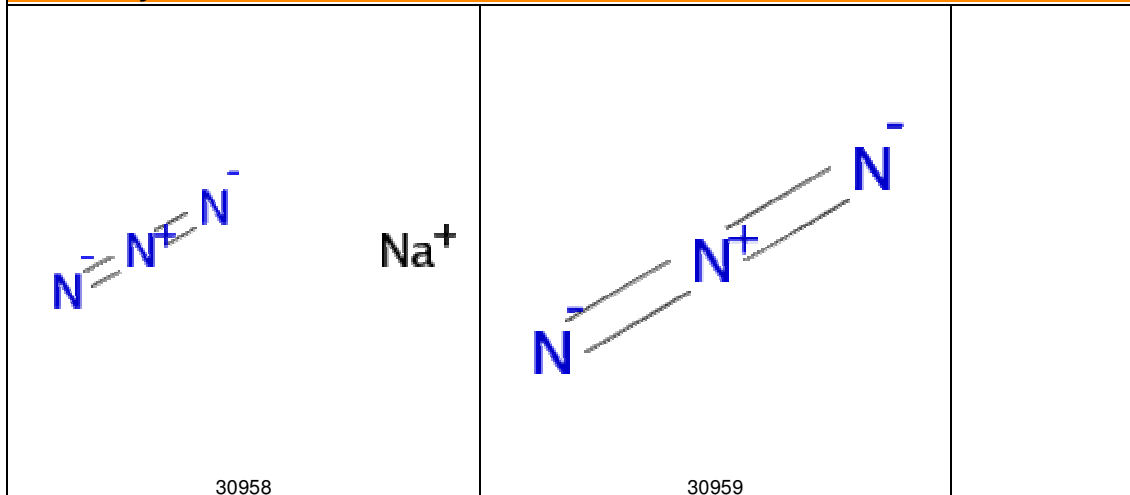

**Name: diacylglycerol analogue 1,2-dioctanoyl-sn-glycerol**

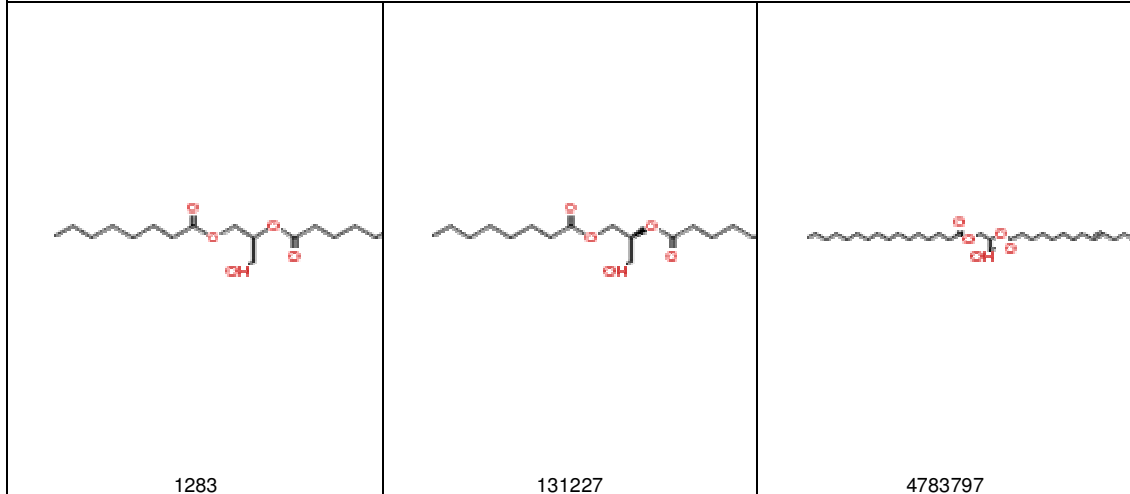

**Name: Epigallocatechin galate**

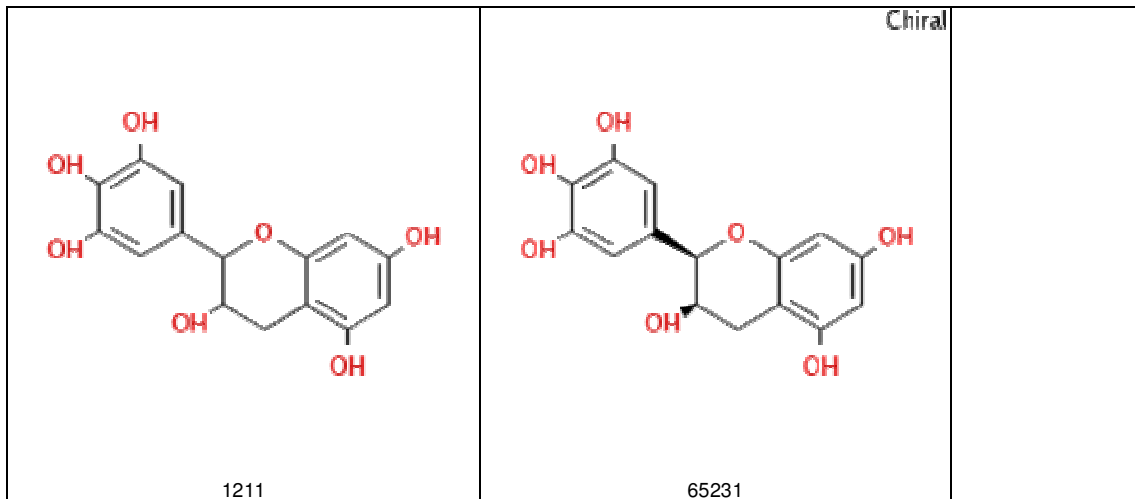

**Name: inositol pyrophosphates IP7**



**Name: proton ionophores**

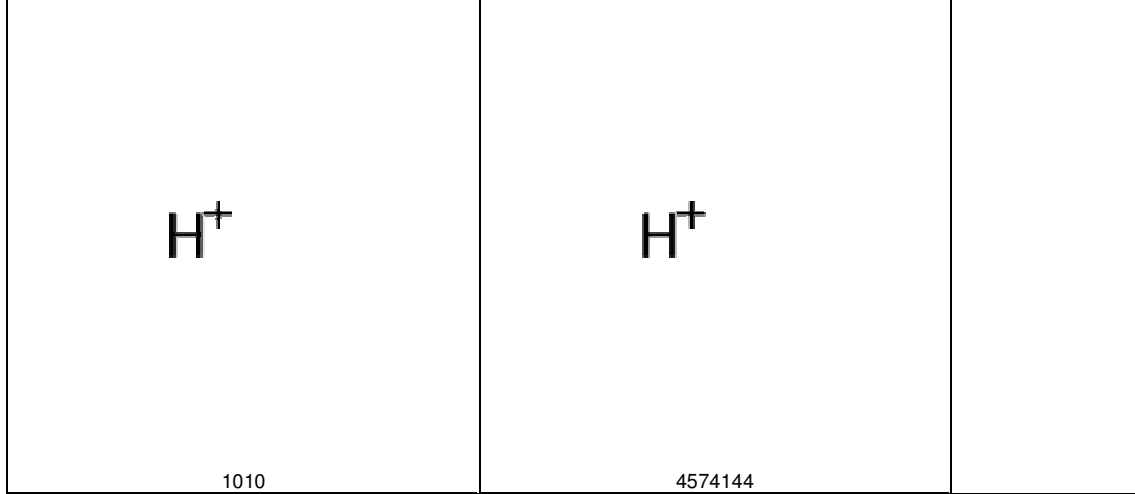

**Name: adenosine 5'-O-(1-thiotriphosphate)**

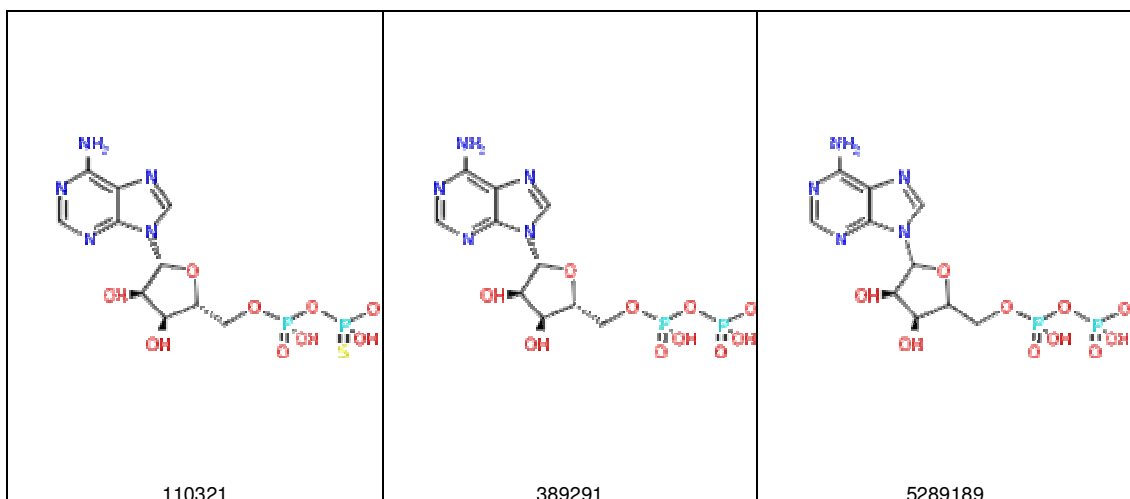

**Name: aminoacyl adenylate**

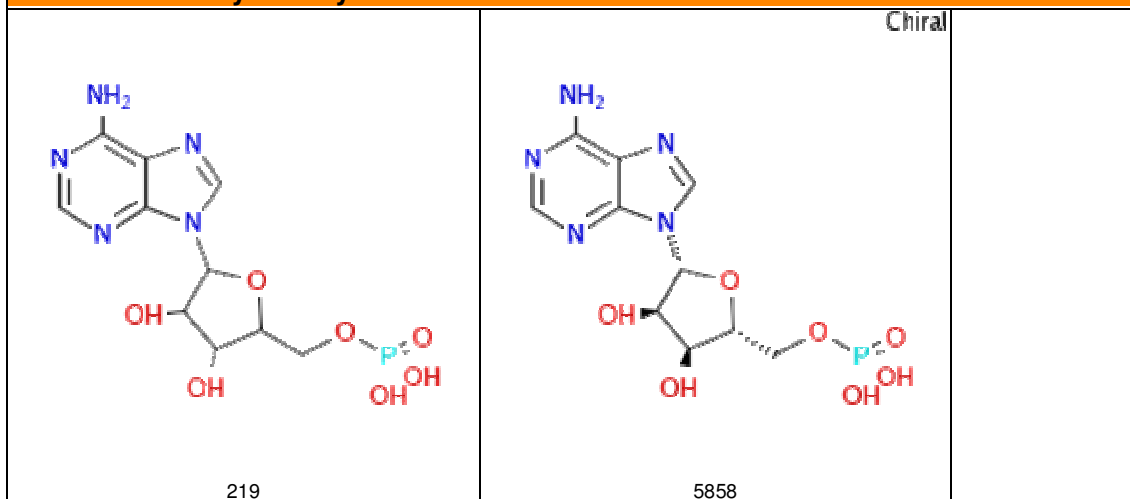

**Name: Adenosine 5'-polyphosphates**

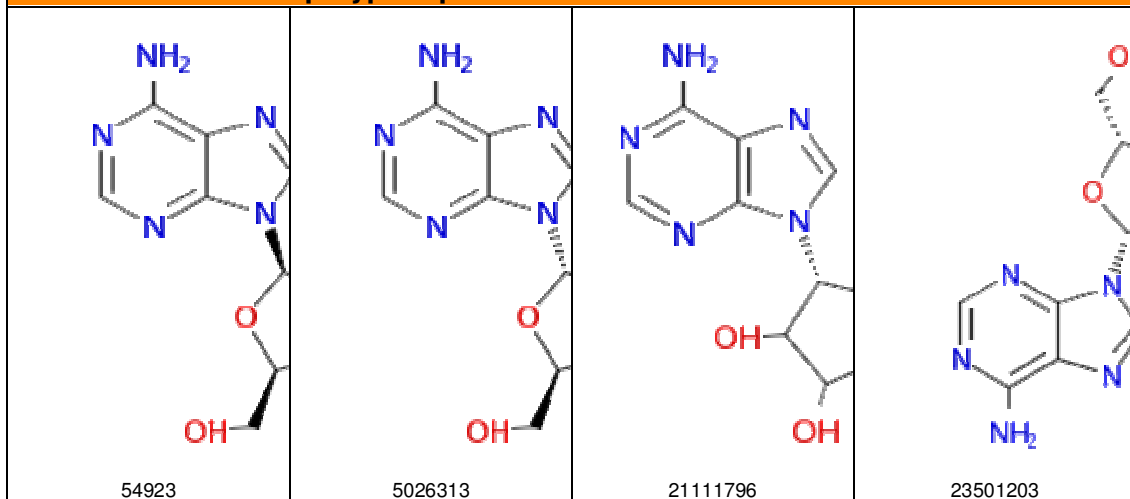

**Name: inositol pentakisphosphate IP(5)**



Name: N,N'-bis[2-(1-piperidino)ethyl]-3,4,9,10-perylenetetracarboxylic diimide

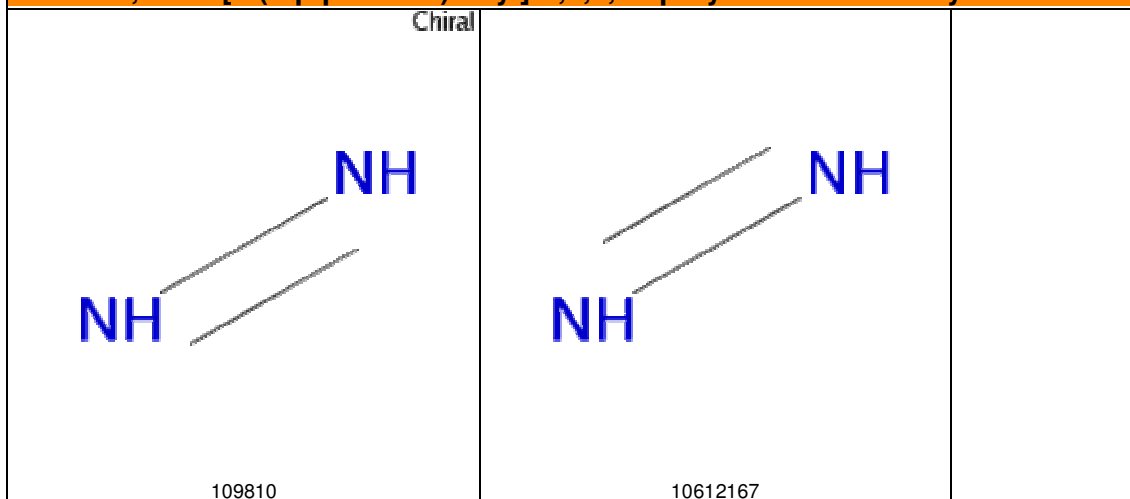

Name: cyproterone acetate

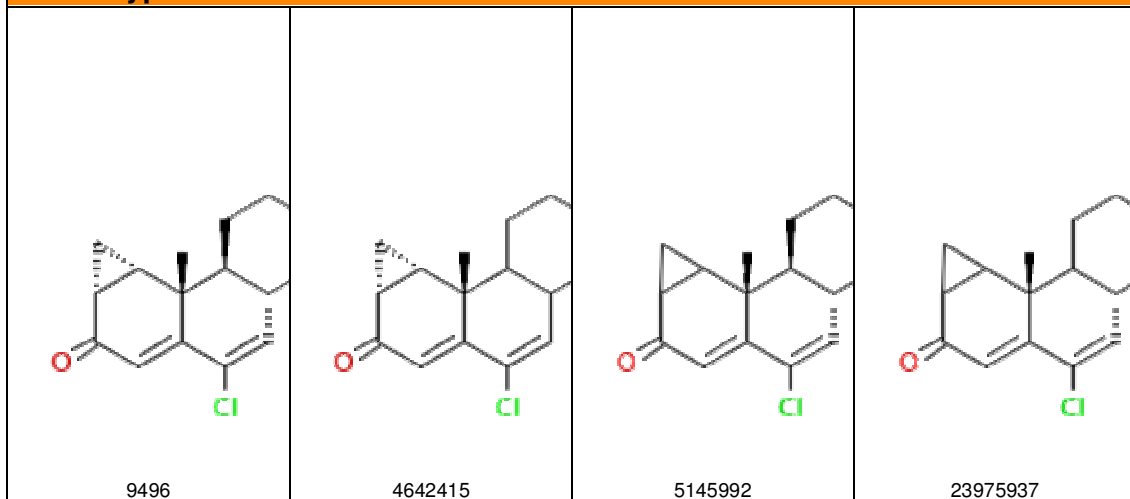

Name: phosphorylate inositol hexakisphosphate



**Name: O-acetyl homoserine-O-acetyl serine**

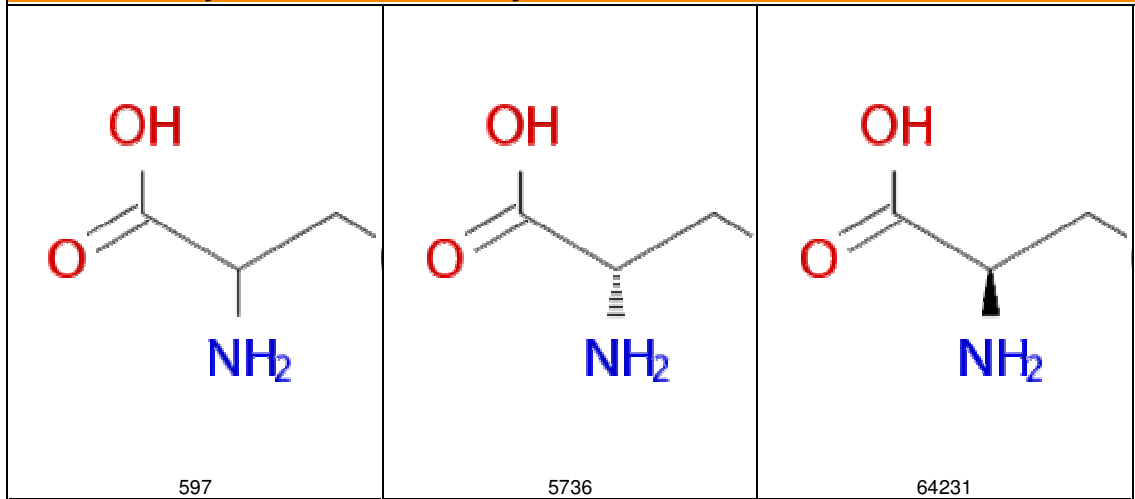

**Name: CDP-DG**

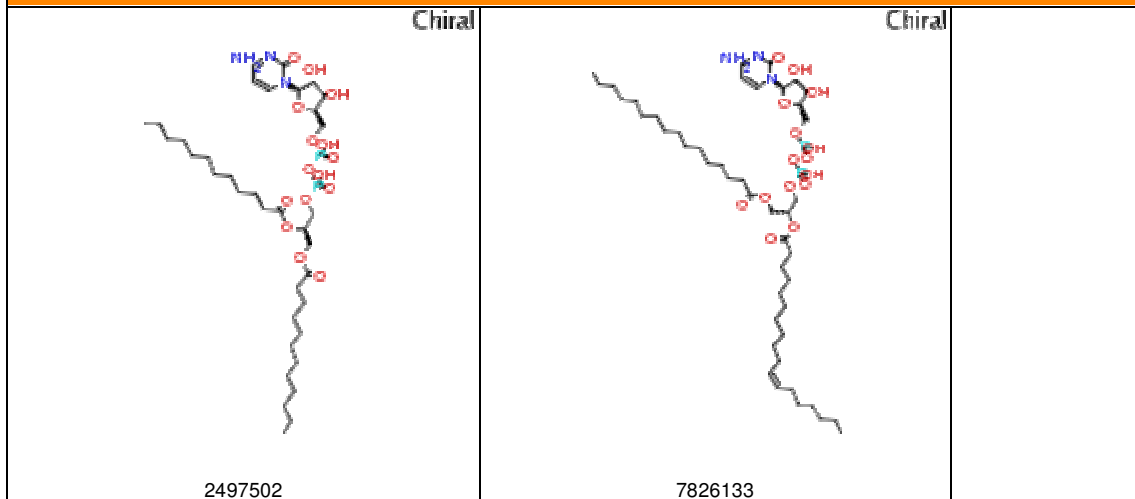

**Name: 10-formyl tetrahydrofolate**

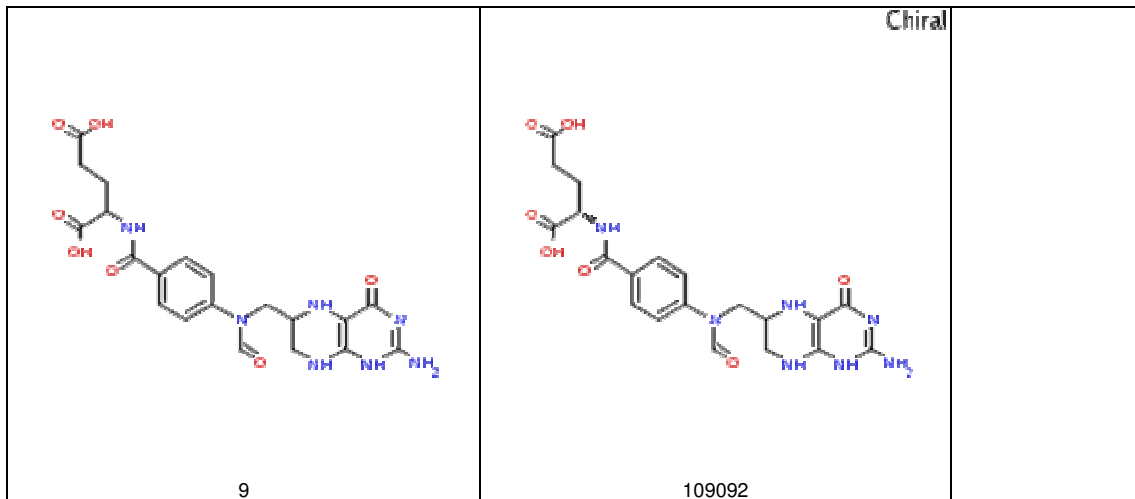

**Name: phosphorylate serine**

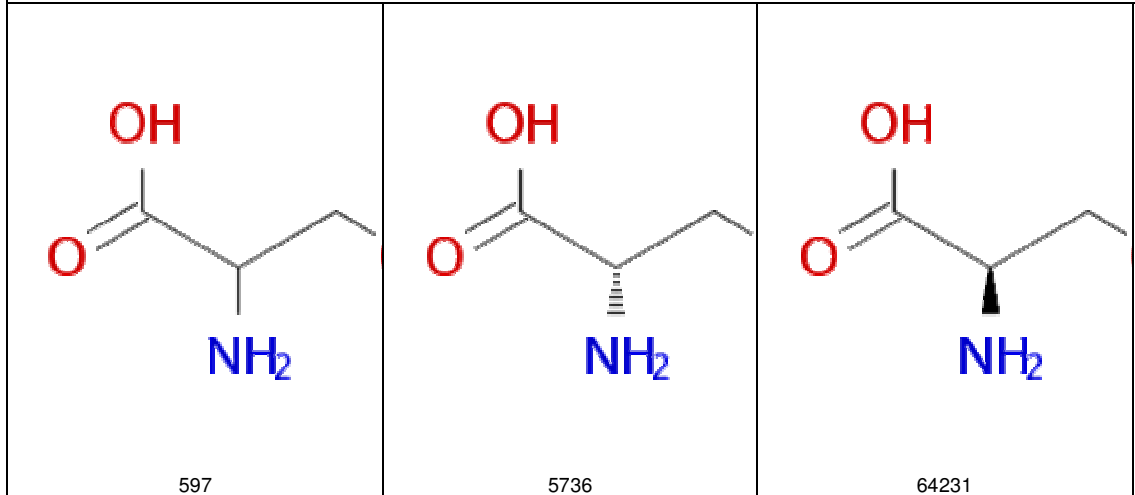

**Name: adenosine 3'-5'biphosphate**

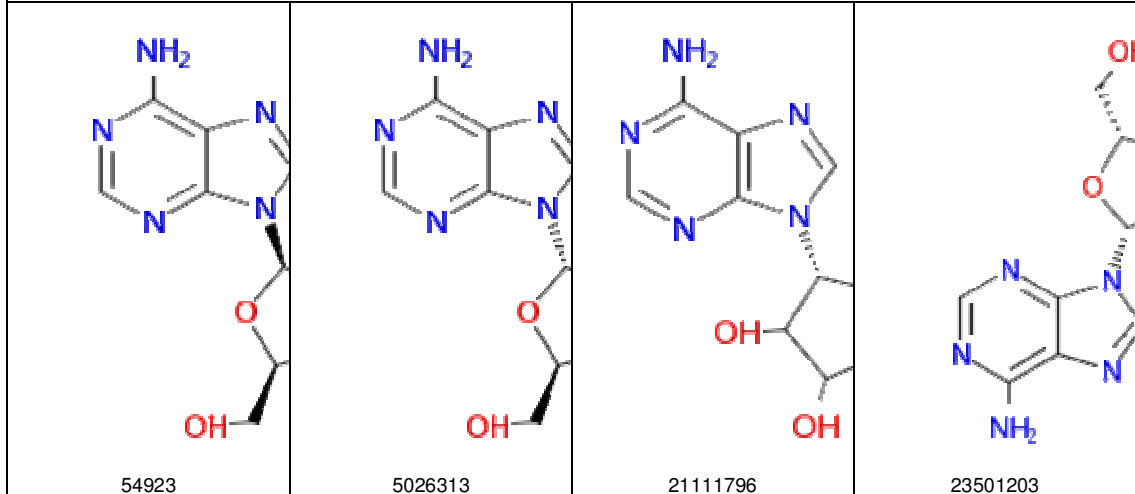

**Name: Ergosterol**



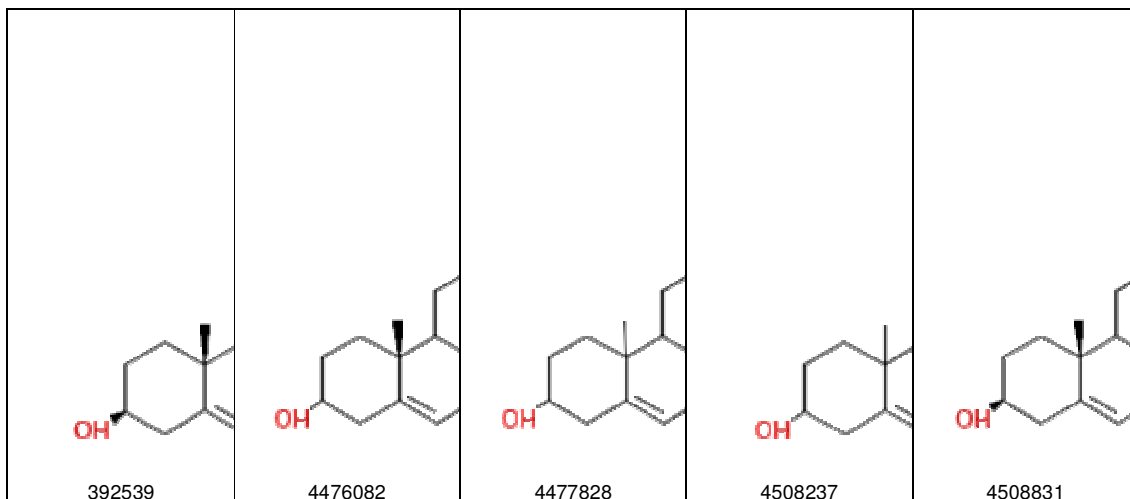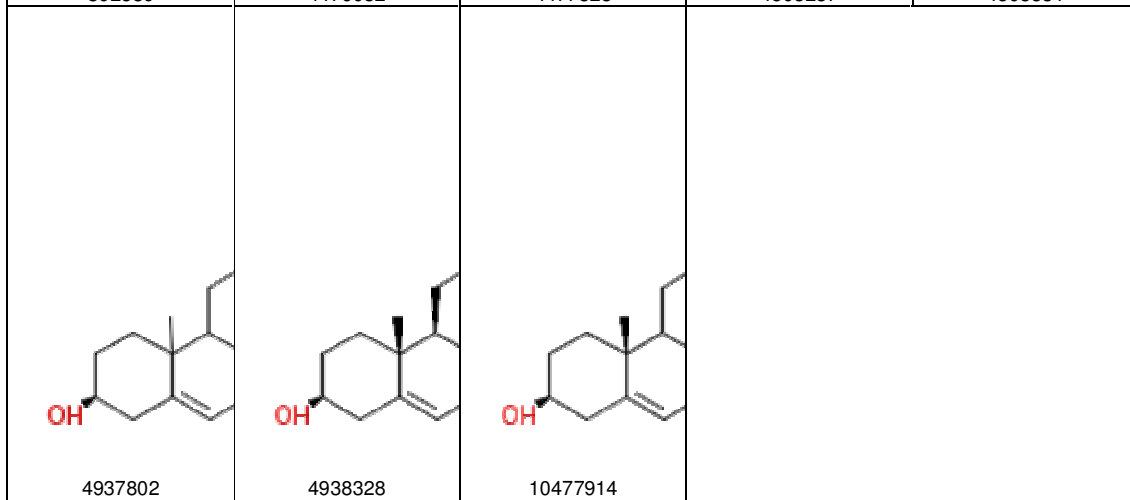

**Name: Lanosterol**

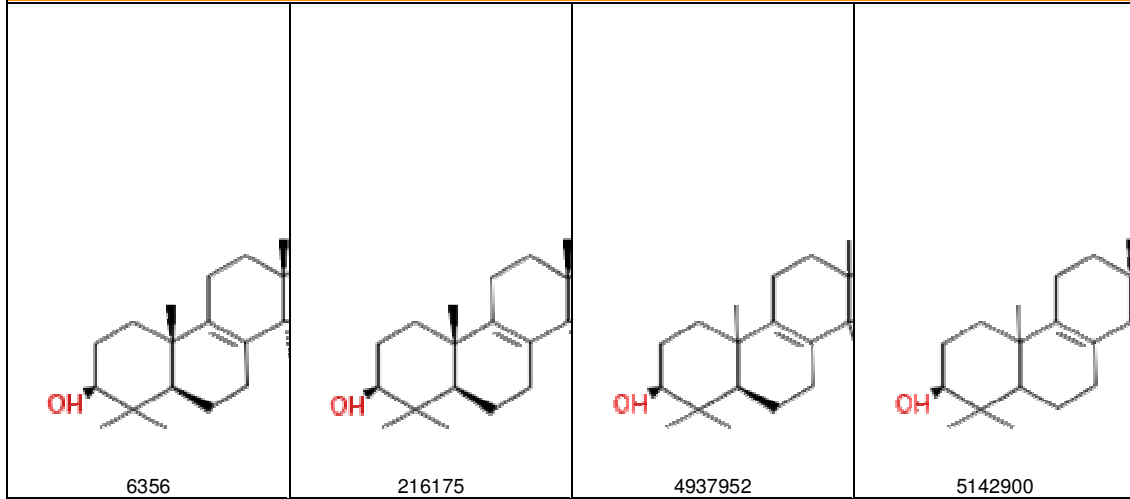

**Name: Guanosine**

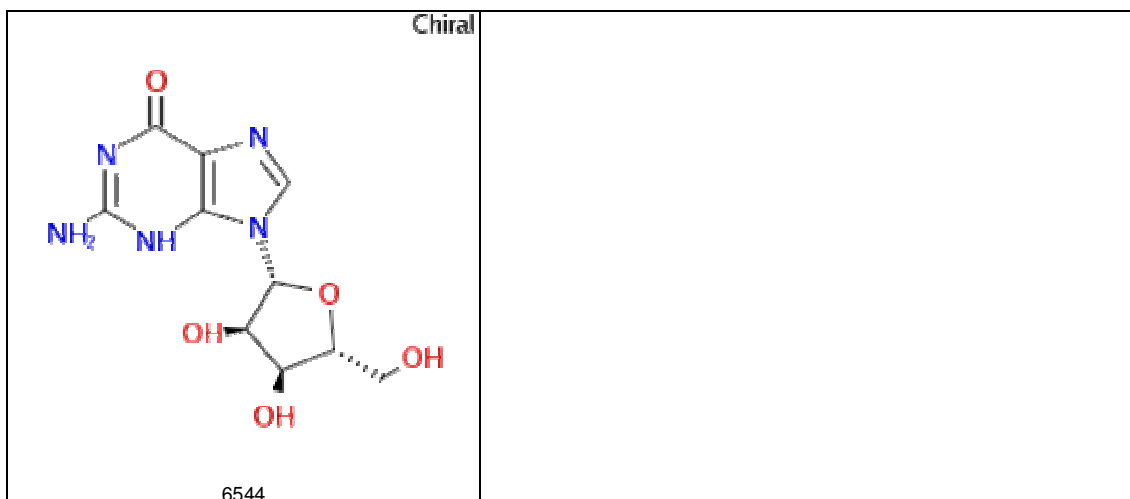

**Name: L-cystathionine**

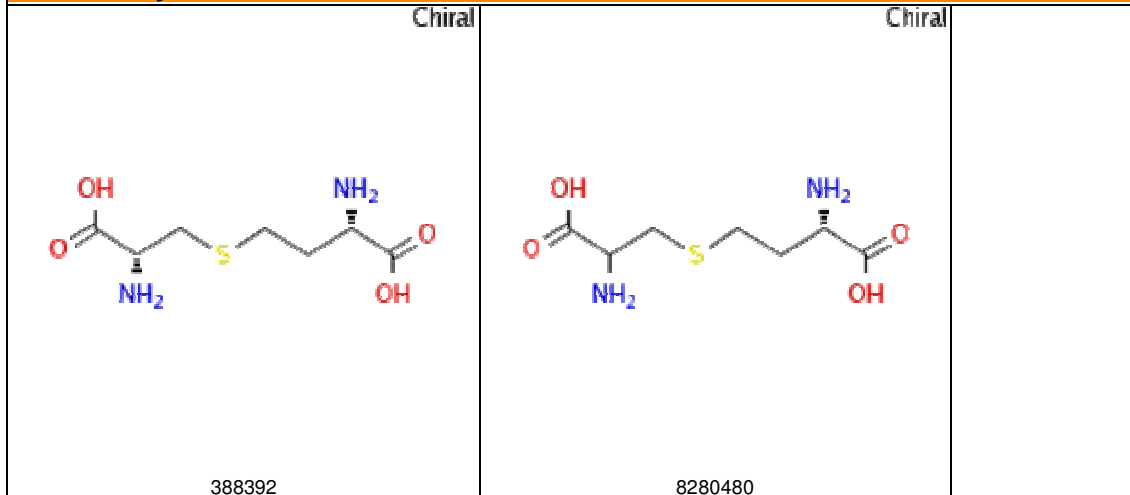

**Name: l-cystathionine**

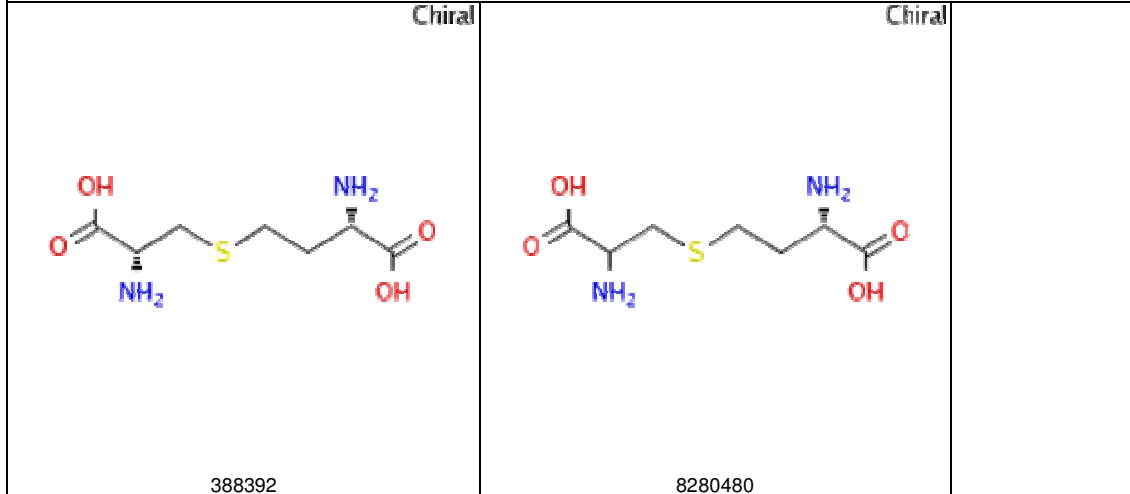

**Name: S-adenosylhomocysteine**

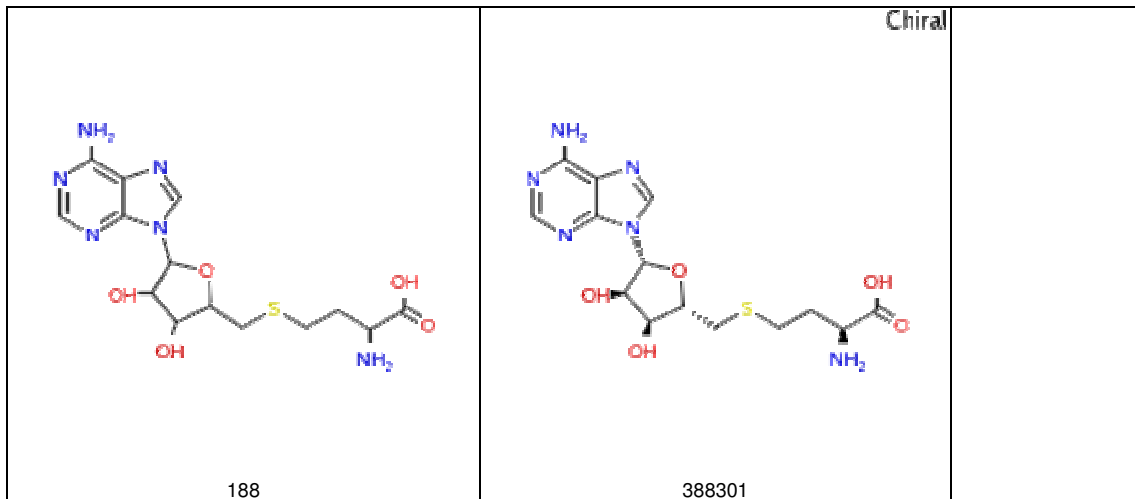

Name: S-Adenosylhomocysteine

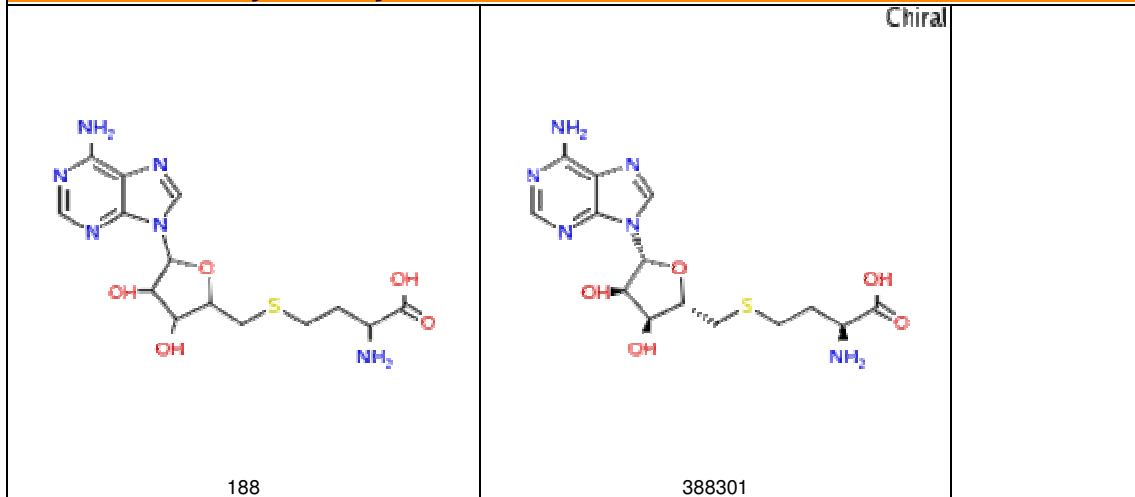

Name: phytate

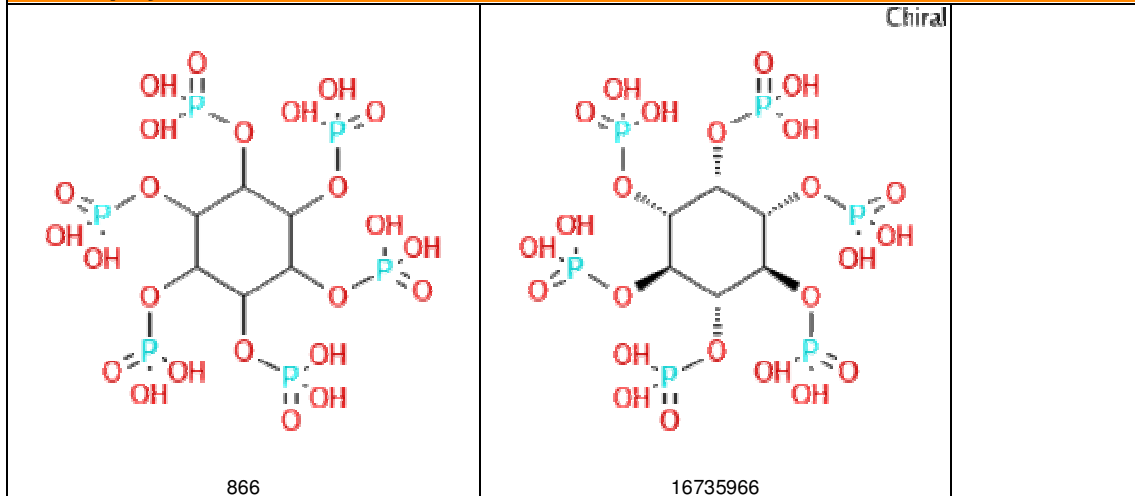

Name: Oleate

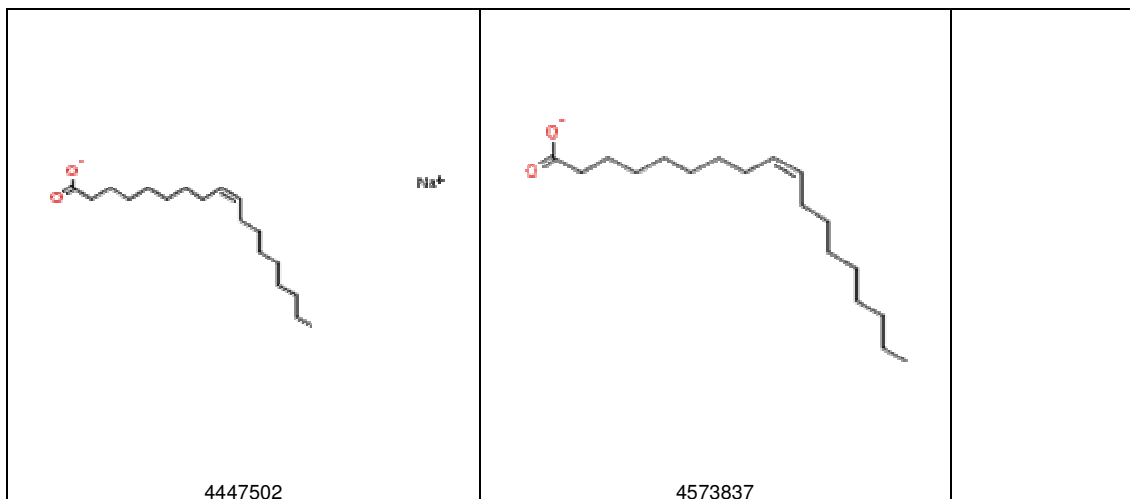

**Name: palmitoleic acid**

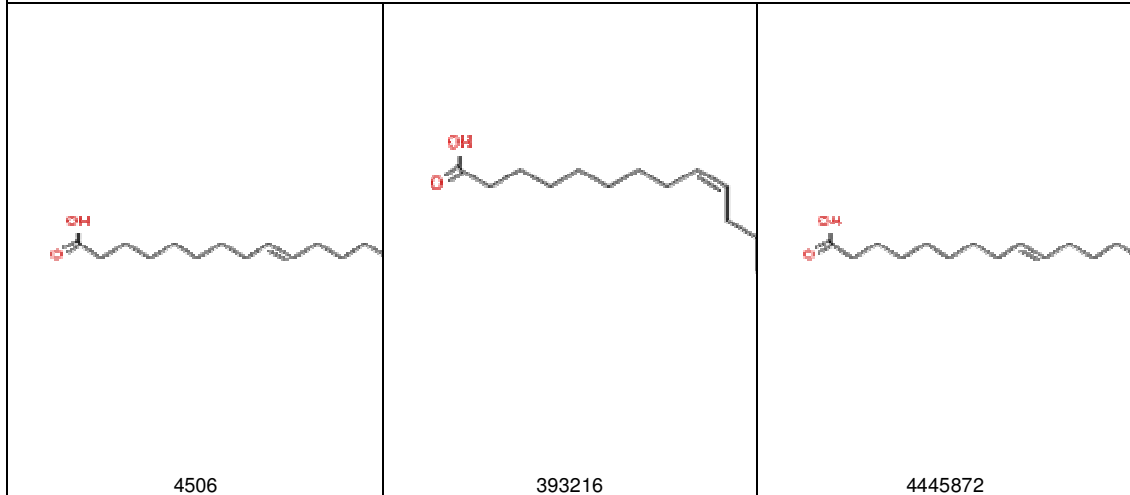

**Name: L-threonine**

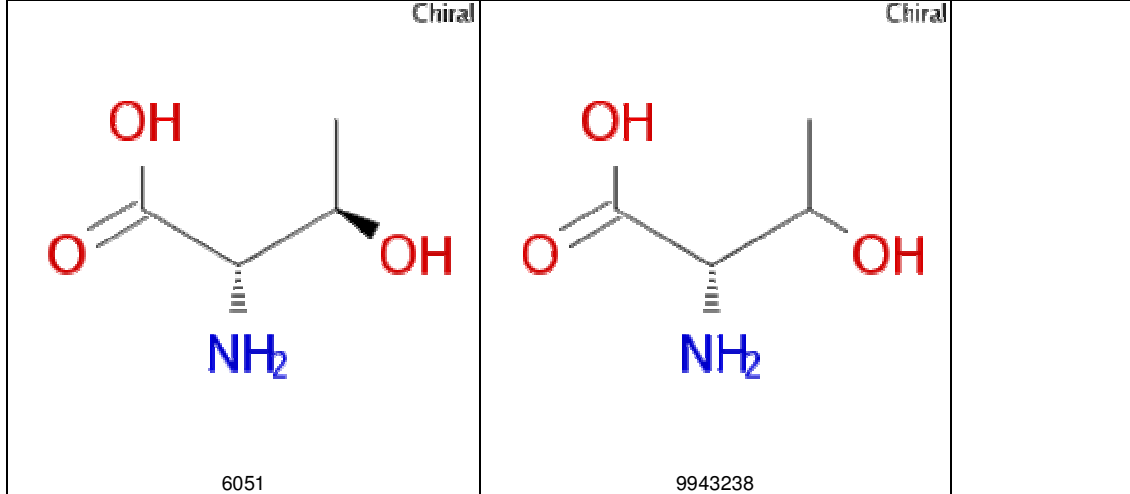

**Name: l-threonine**

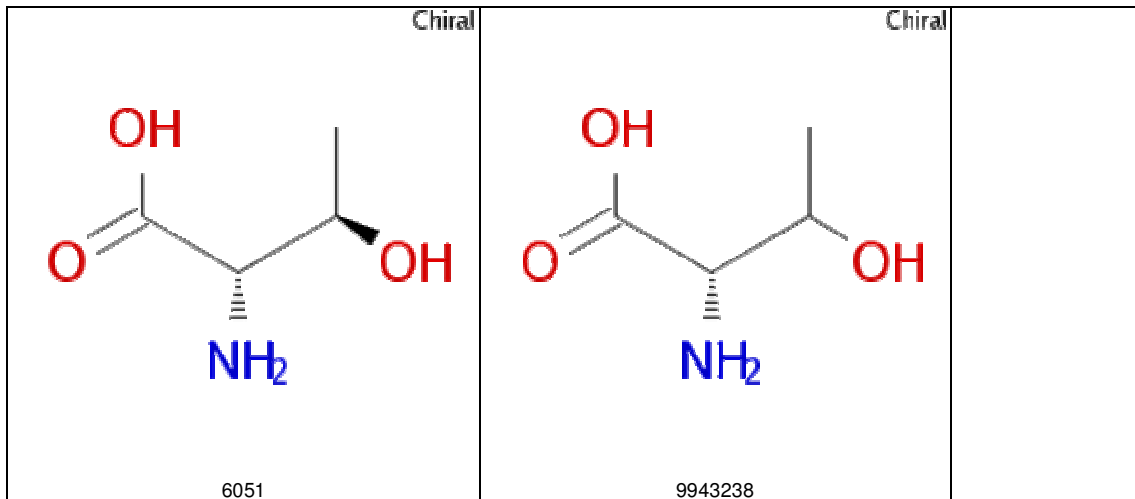

**Name: L-Threonine**

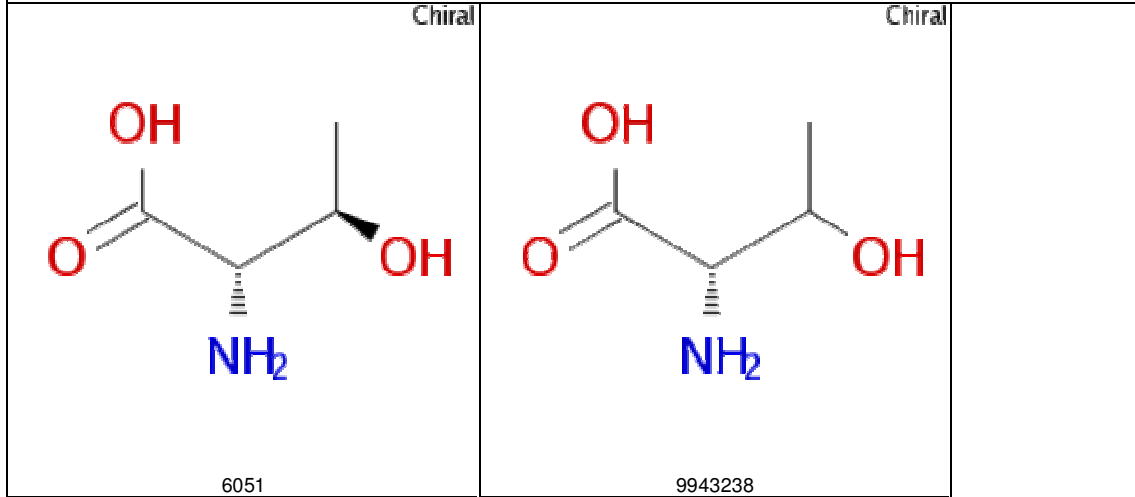

**Name: Phytic acid**

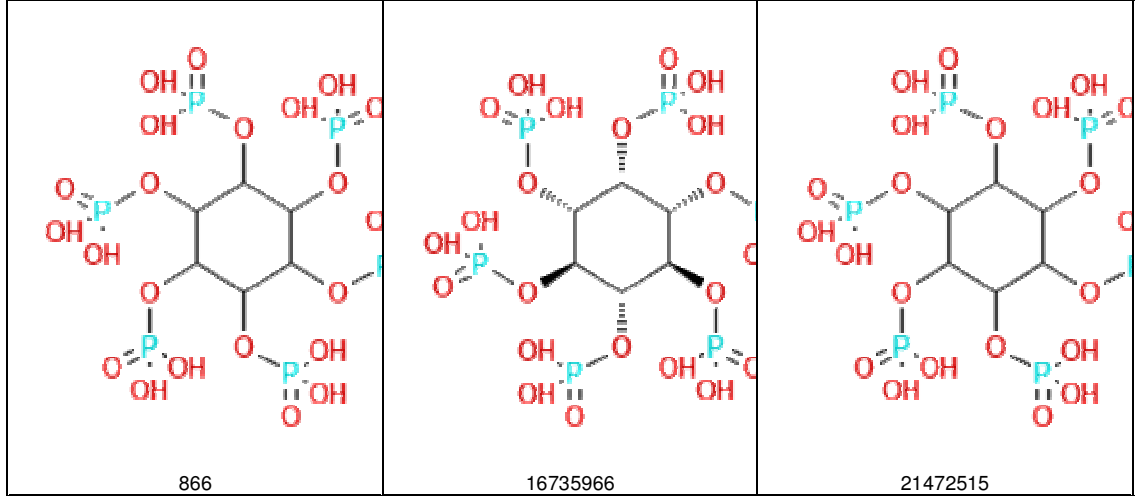

**Name: GDP**

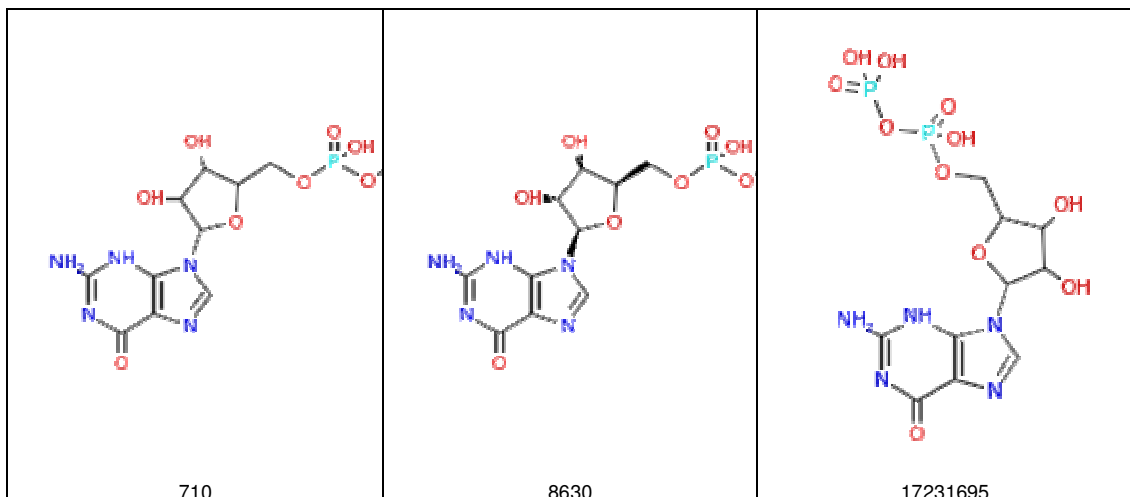

**Name: Inosine**

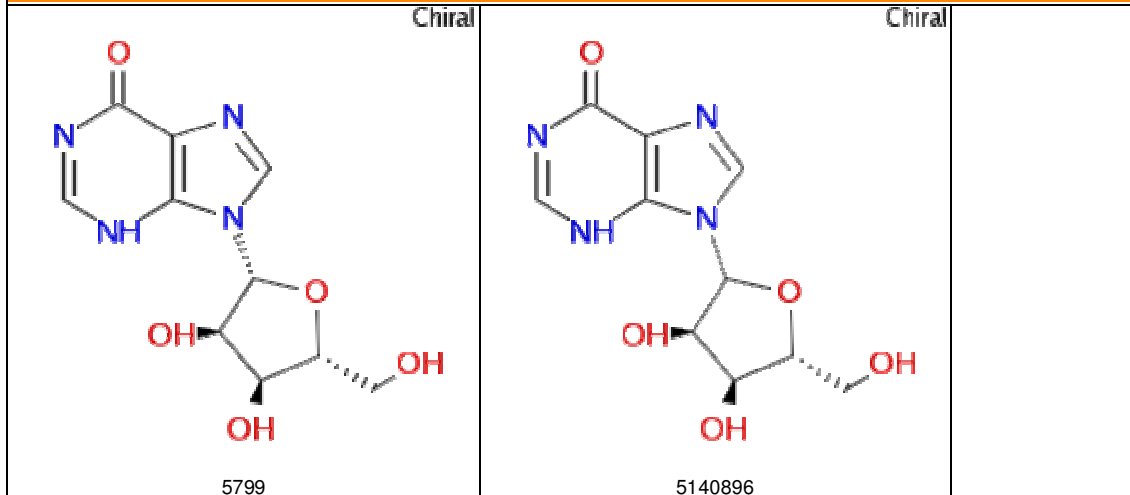

**Name: adrenic acid**

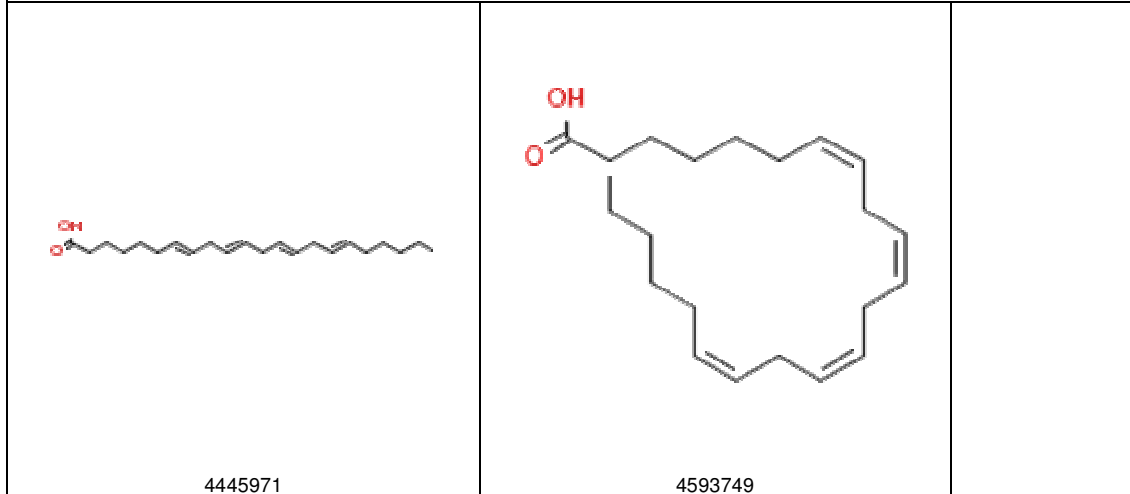

**Name: L-isoleucine**

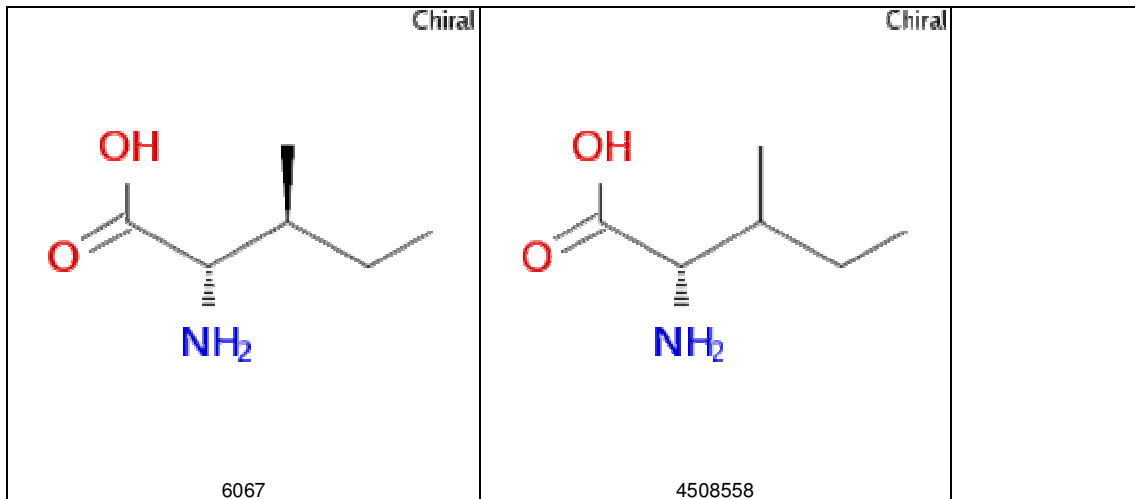

**Name: malonyl-CoA**

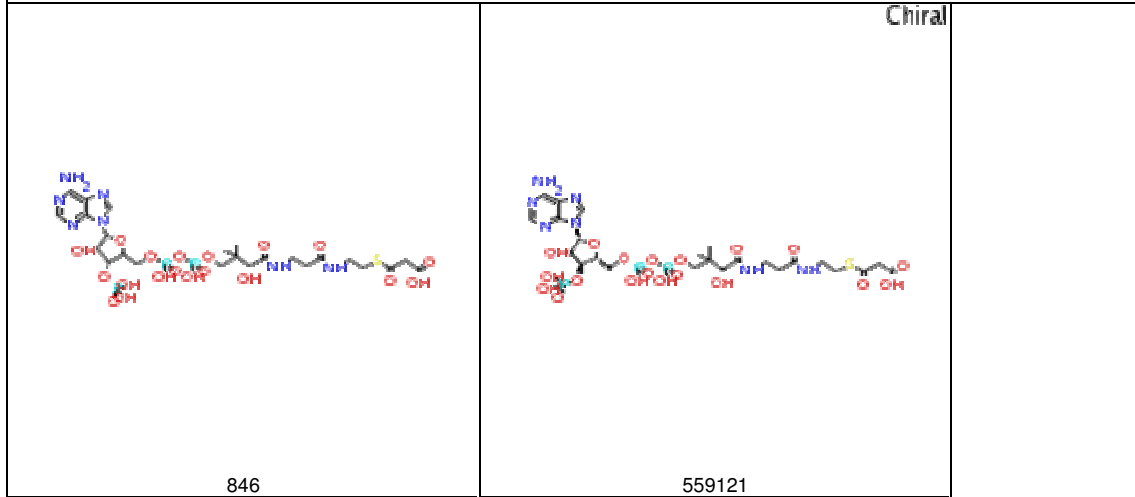

**Name: Phytosphingosine**

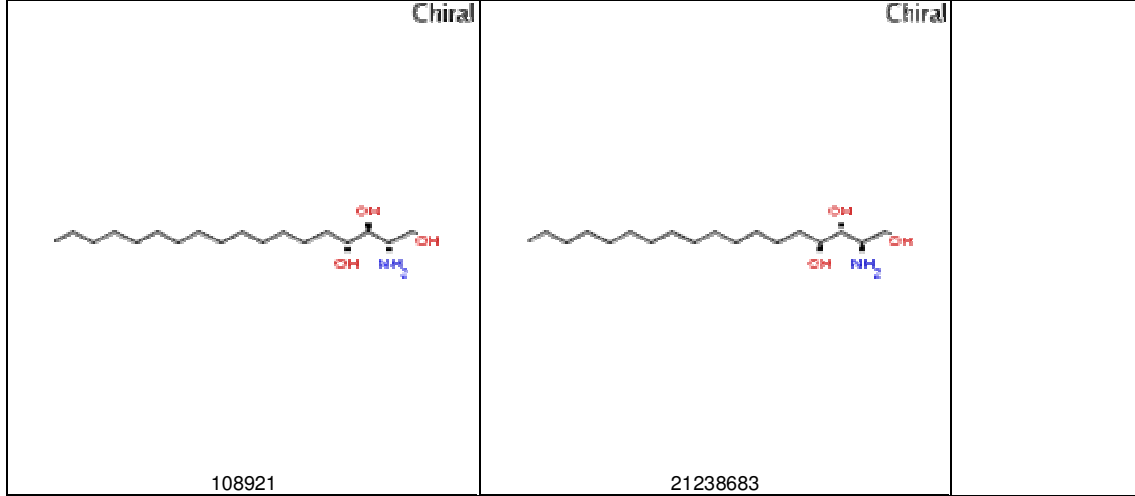

**Name: Glutathione**

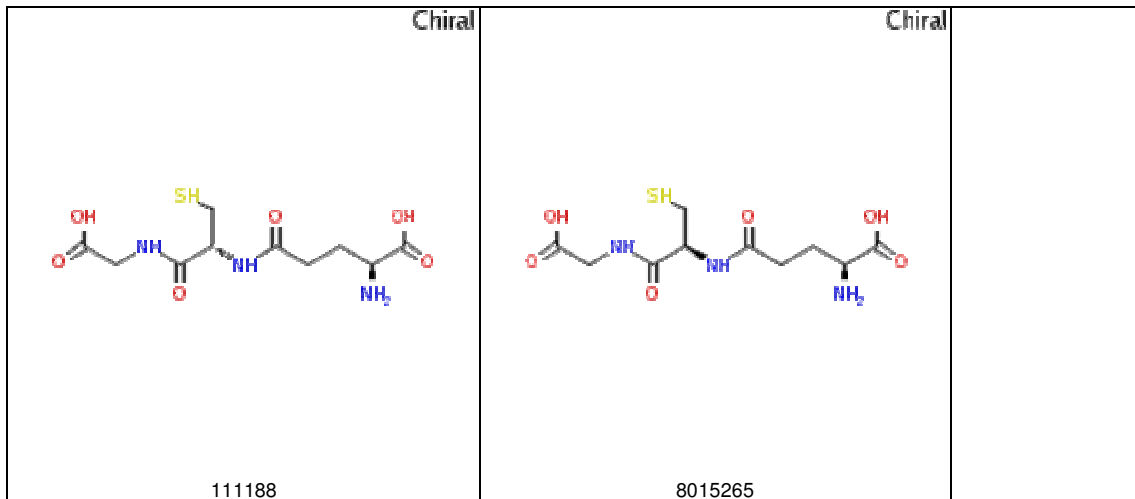

**Name: Citrulline**

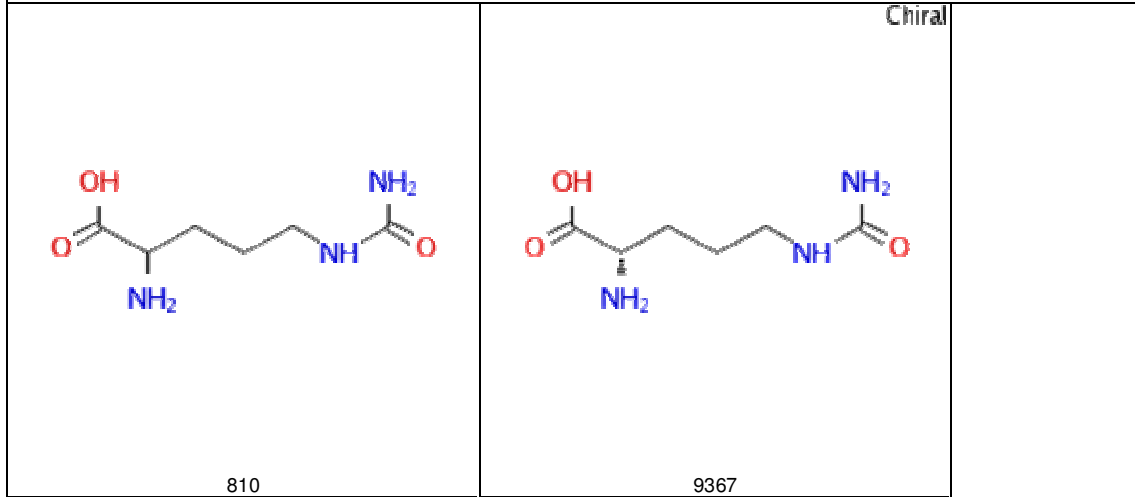

**Name: 3-hexaprenyl-4-hydroxybenzoic acid**

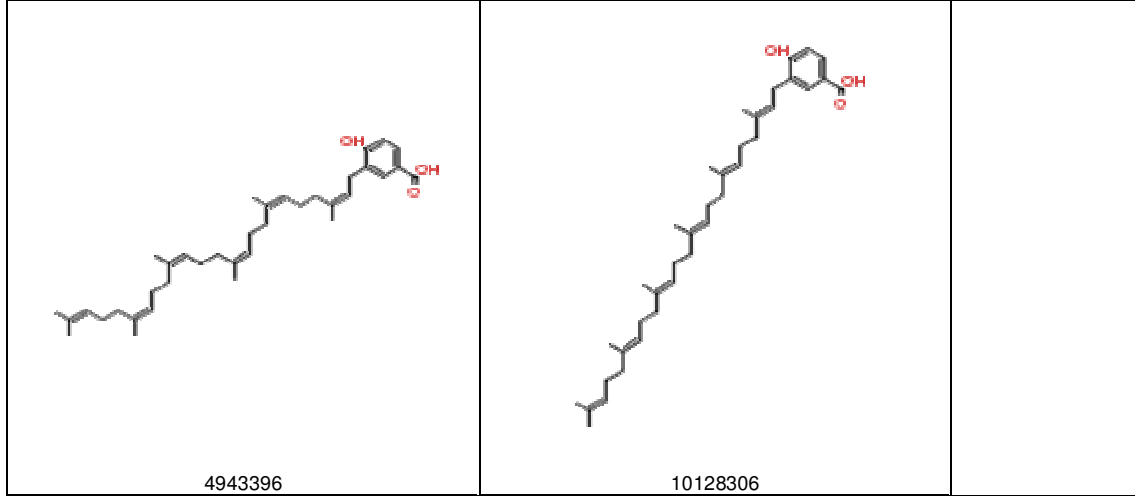

**Name: folic acid**



|                                                                                   |                                                                                   |                                                                                   |                                                                                    |                                                                                     |
|-----------------------------------------------------------------------------------|-----------------------------------------------------------------------------------|-----------------------------------------------------------------------------------|------------------------------------------------------------------------------------|-------------------------------------------------------------------------------------|
| 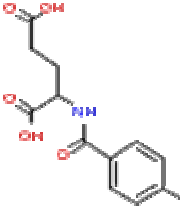 |  |  |  |  |
| 140                                                                               | 5784                                                                              | 49292                                                                             | 119394                                                                             | 131714                                                                              |

**Name: Pantothenic acid**

|                                                                                    |                                                                                     |        |
|------------------------------------------------------------------------------------|-------------------------------------------------------------------------------------|--------|
| 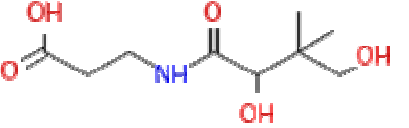 |  | Chiral |
| 963                                                                                | 6361                                                                                |        |

**Name: Adenosine**

|                                                                                     |                                                                                      |        |        |
|-------------------------------------------------------------------------------------|--------------------------------------------------------------------------------------|--------|--------|
| 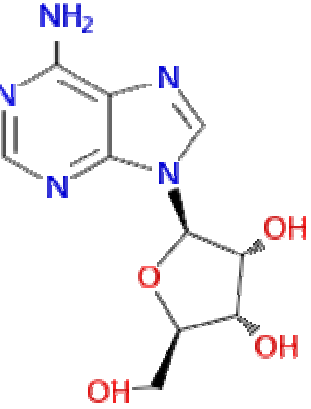 |  | Chiral | Chiral |
| 54923                                                                               | 23501203                                                                             |        |        |

**Name: 2-isopropylmalic acid**

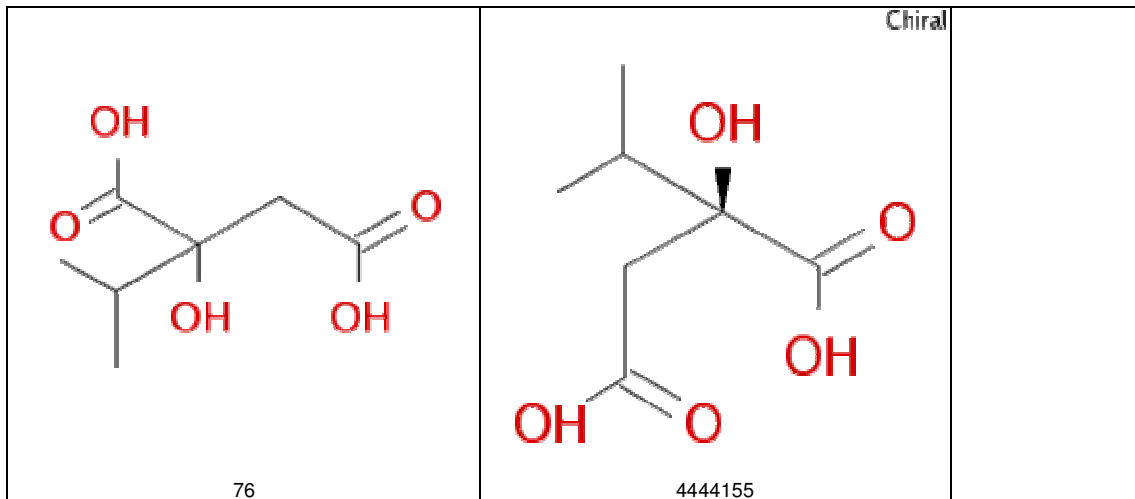

Name: stearyl-CoA

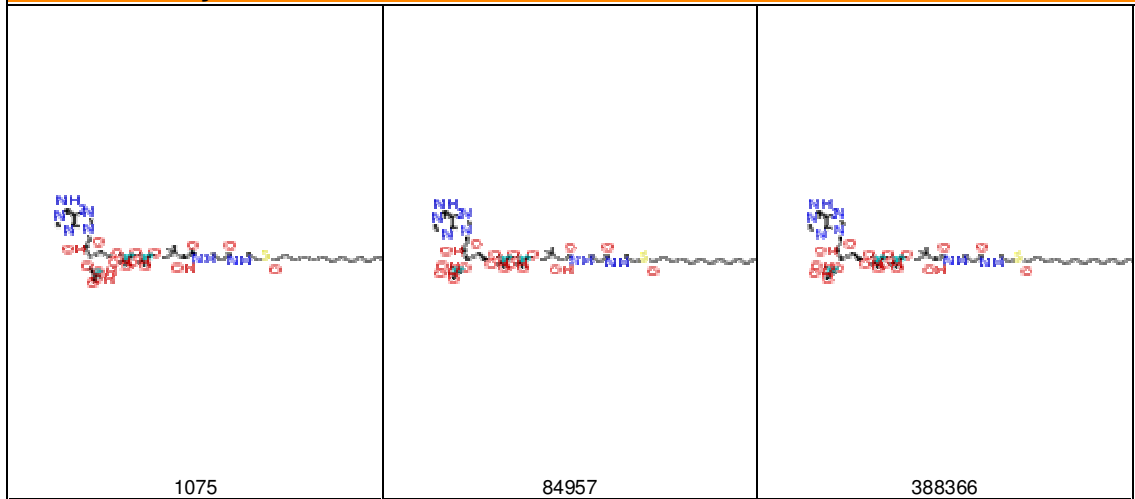

Name: O-phosphohomoserine

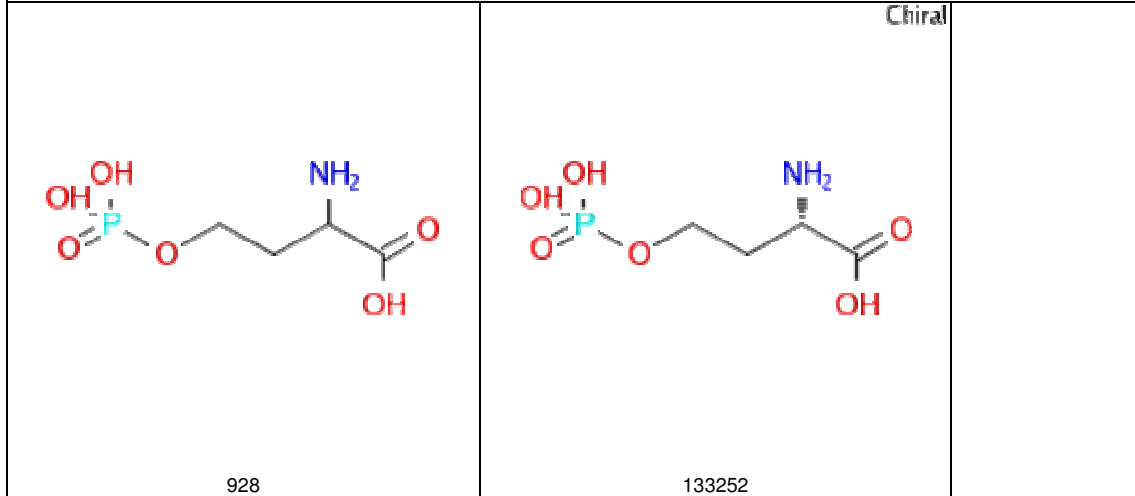

Name: Ureidosuccinic acid

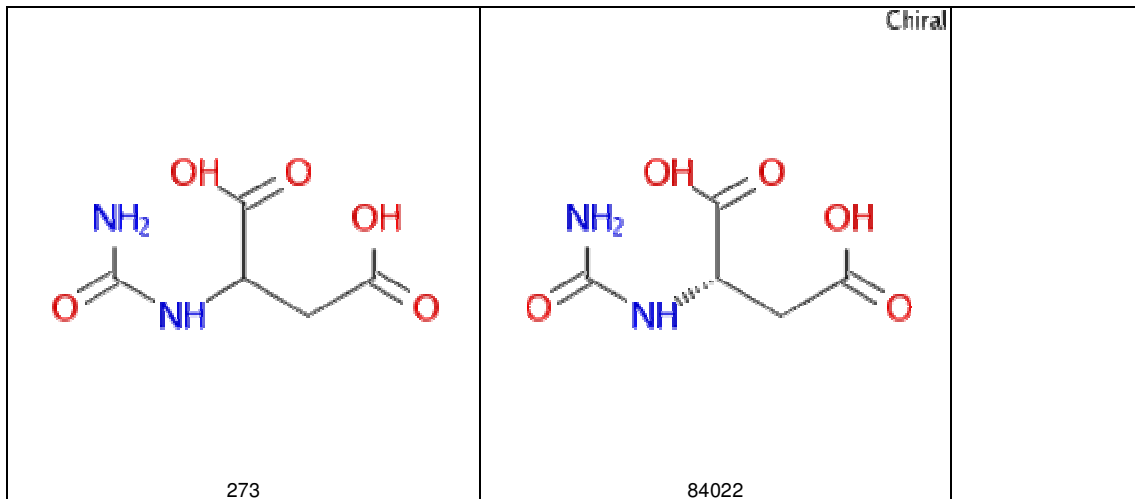

**Name: Raffinose**

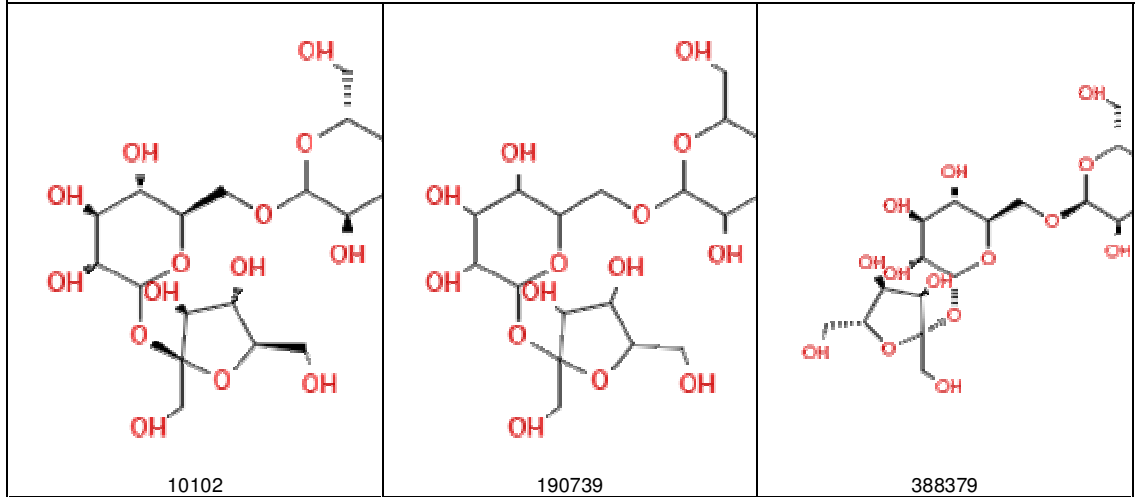

**Name: Linolenic acid**

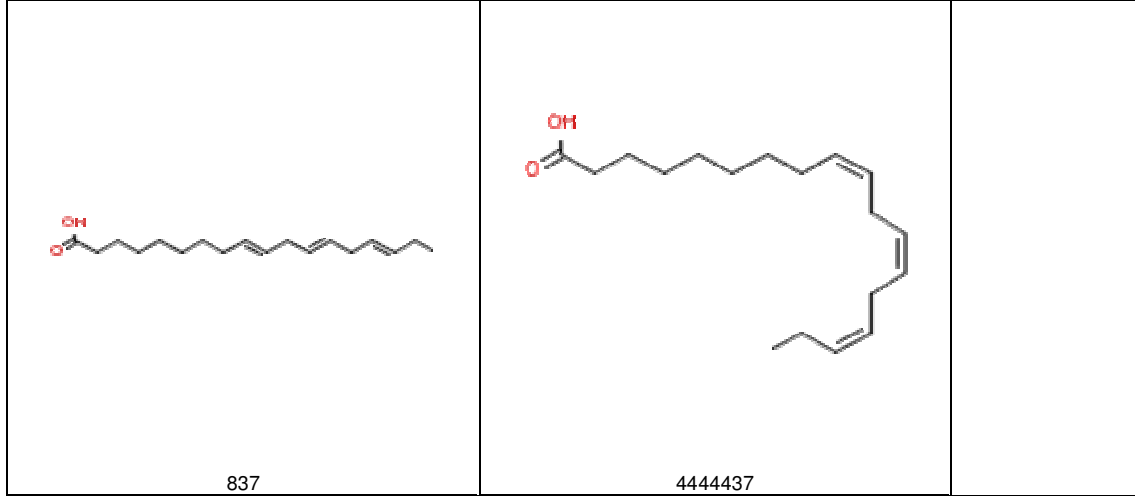

**Name: zymosterol**

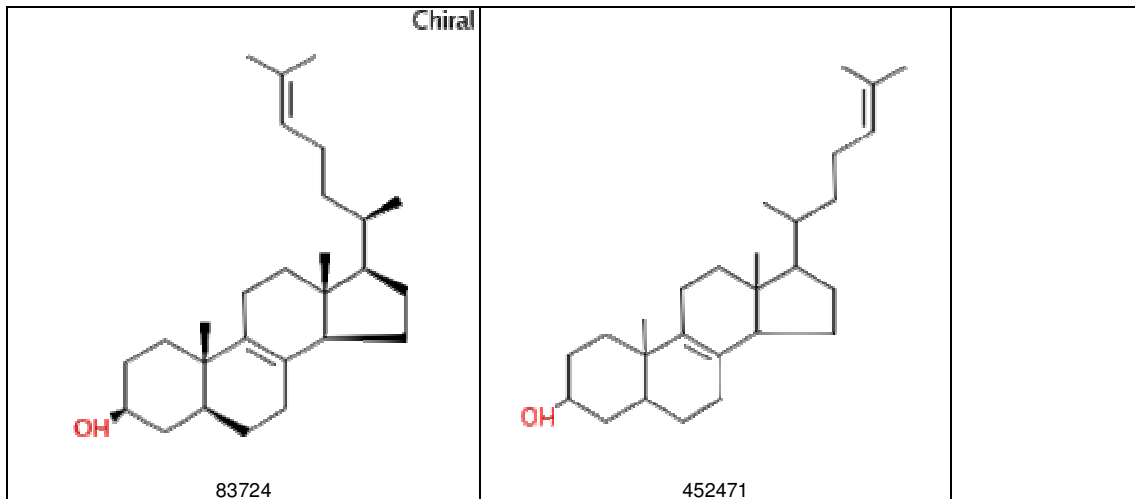

**Name: Acetyl-CoA**

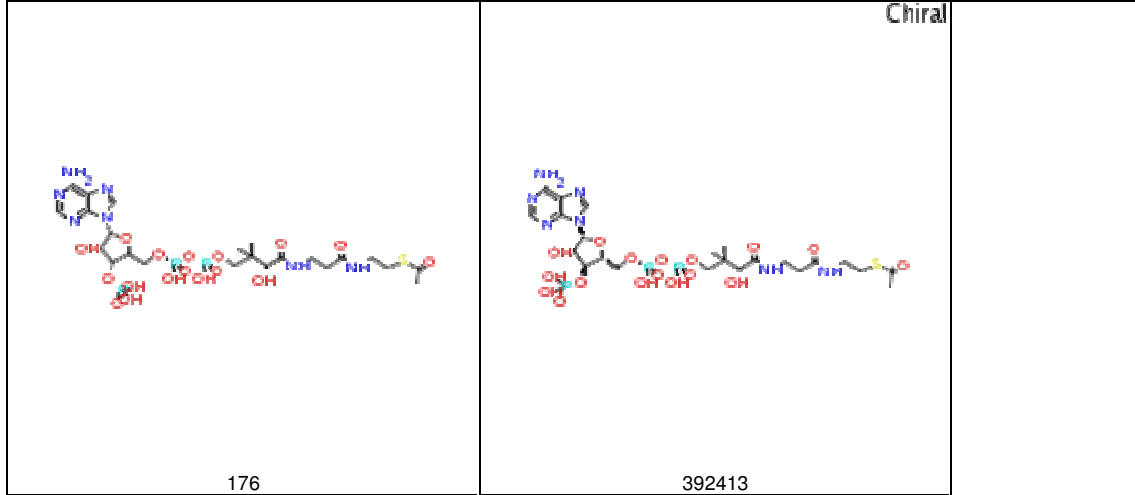

**Name: acetyl-coA**

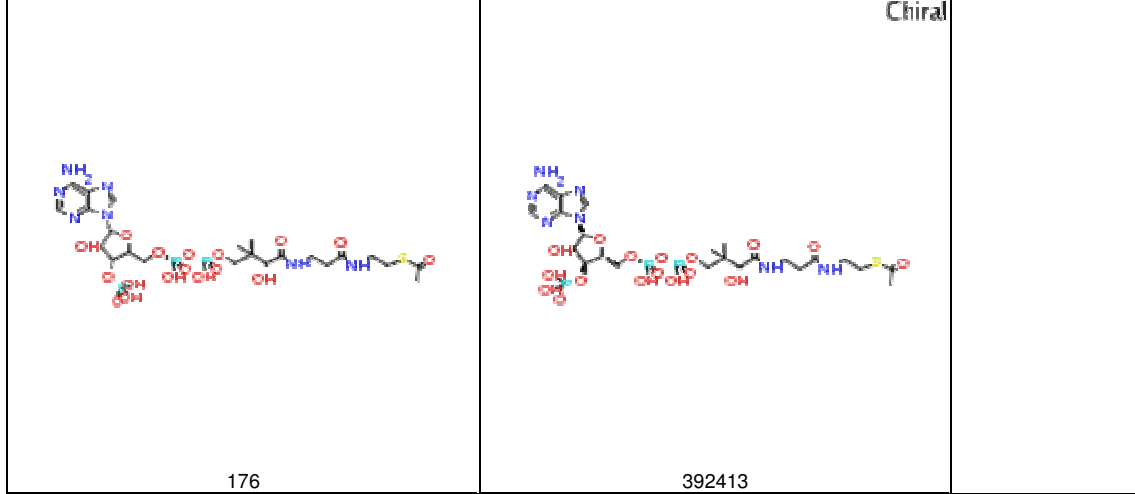

**Name: Vitamin B1**

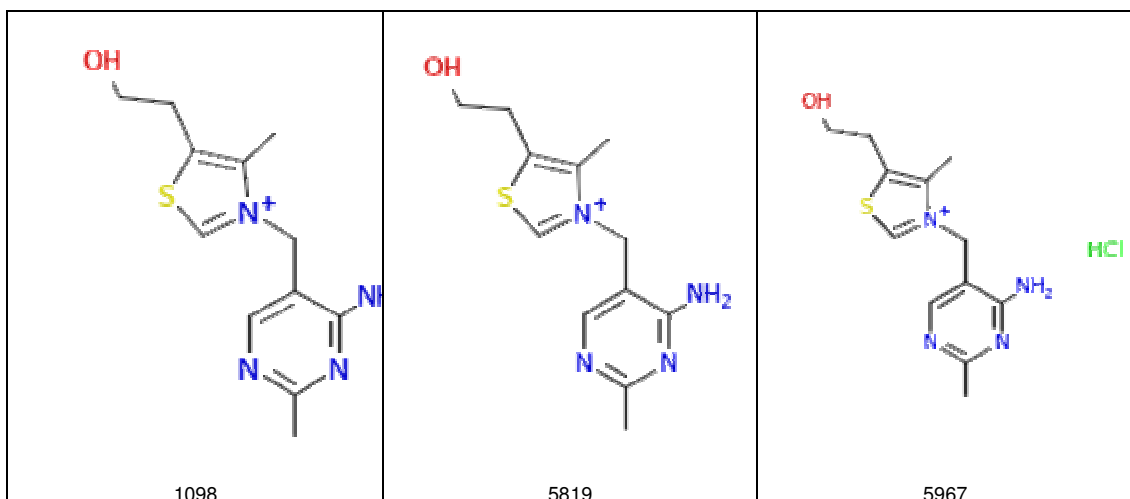

**Name: Cinnamic acid**

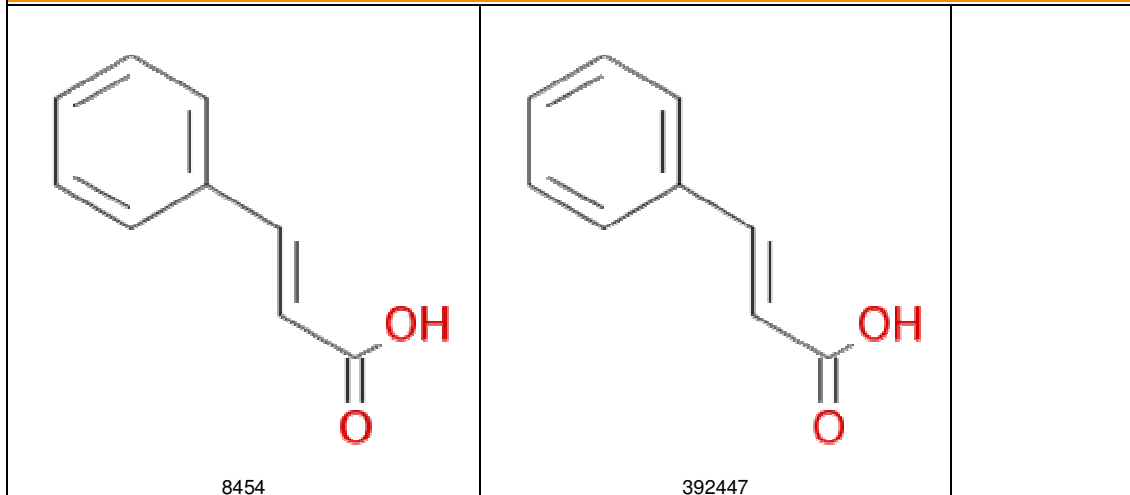

**Name: Squalene**

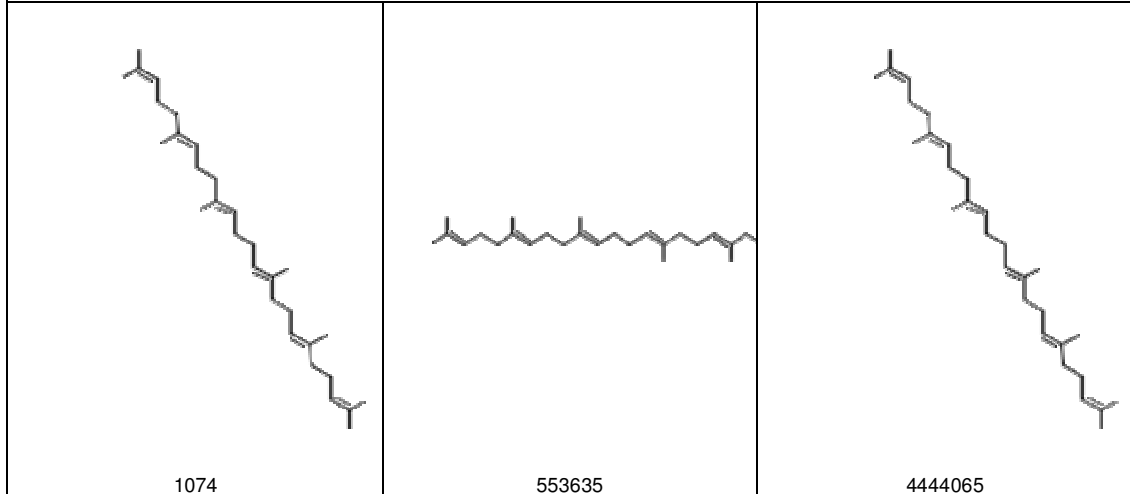

**Name: Tetrahydrofolate**

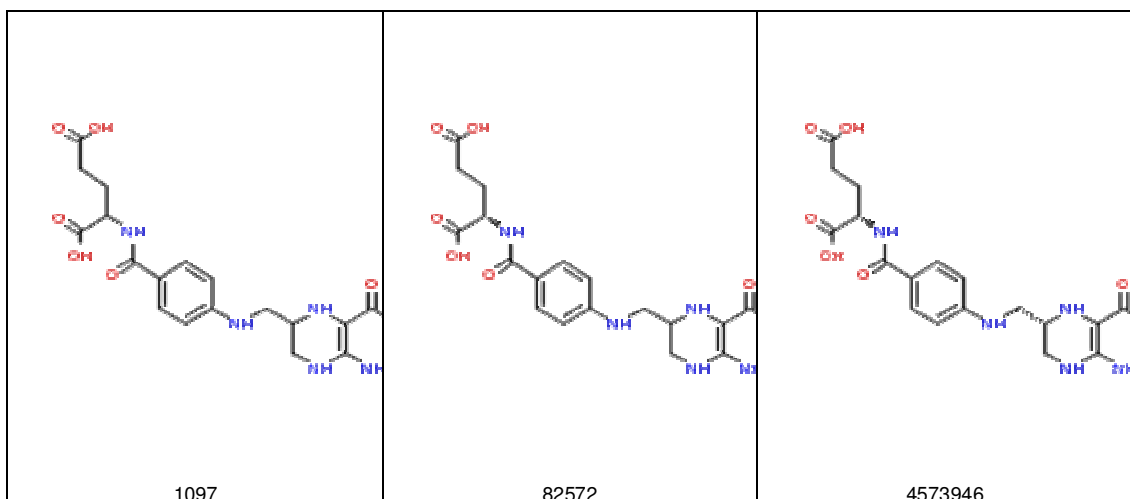

**Name: L-arabinitol**

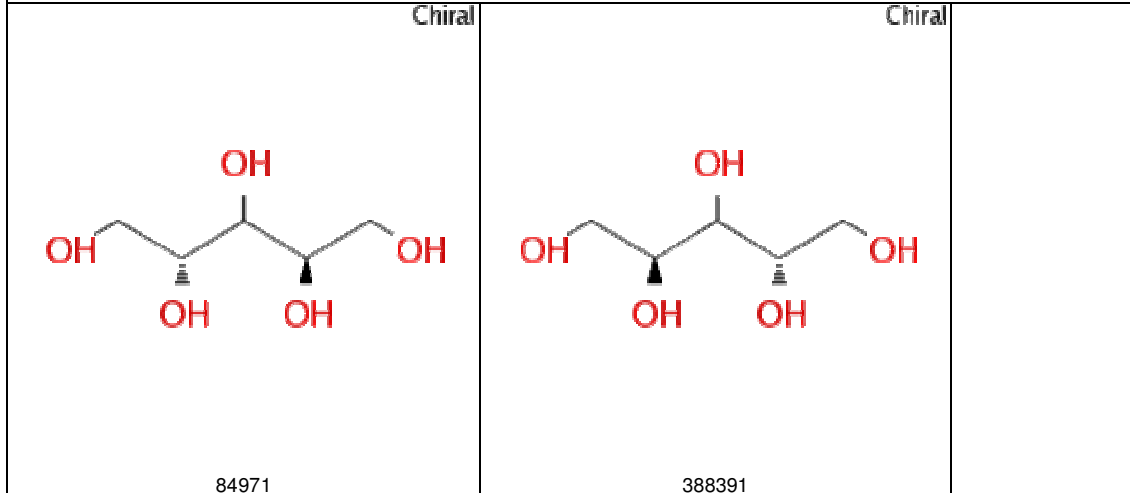

**Name: thymidylate**

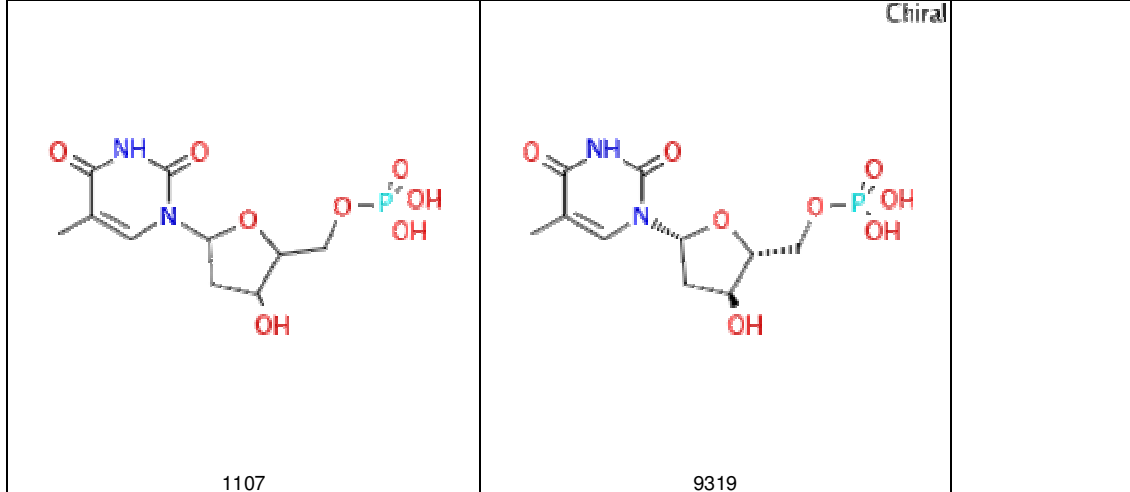

**Name: propionyl-CoA**

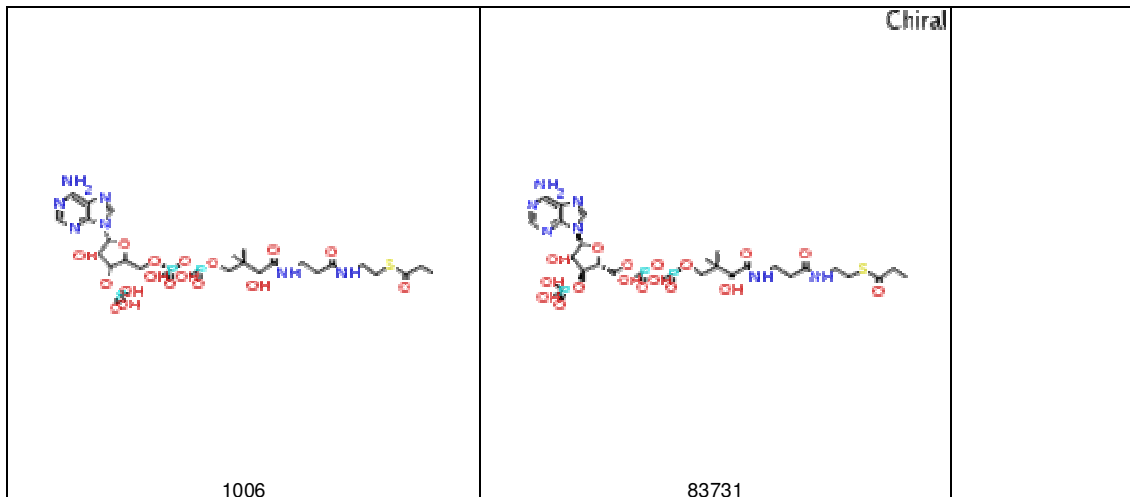

**Name: oleoyl-CoA**

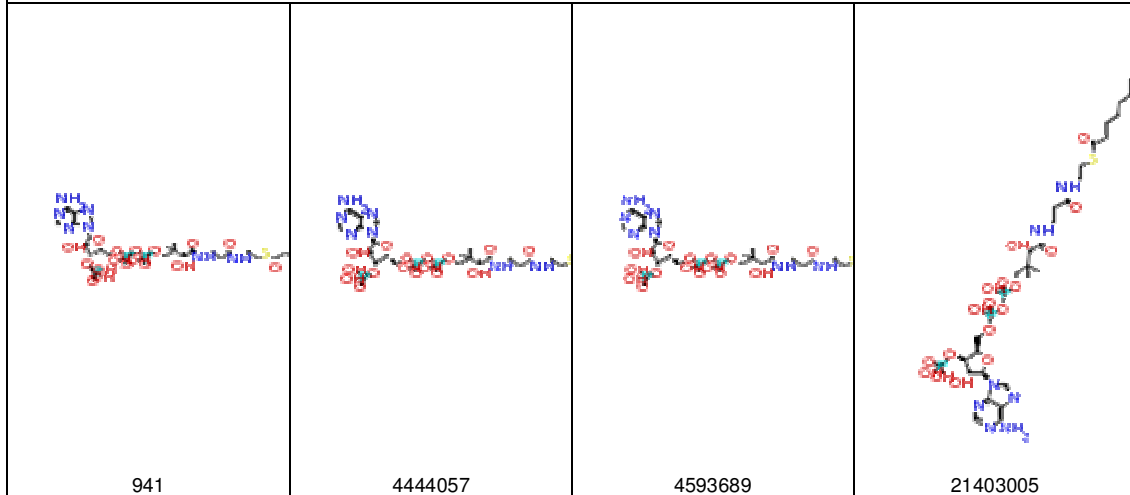

**Name: Inositol**

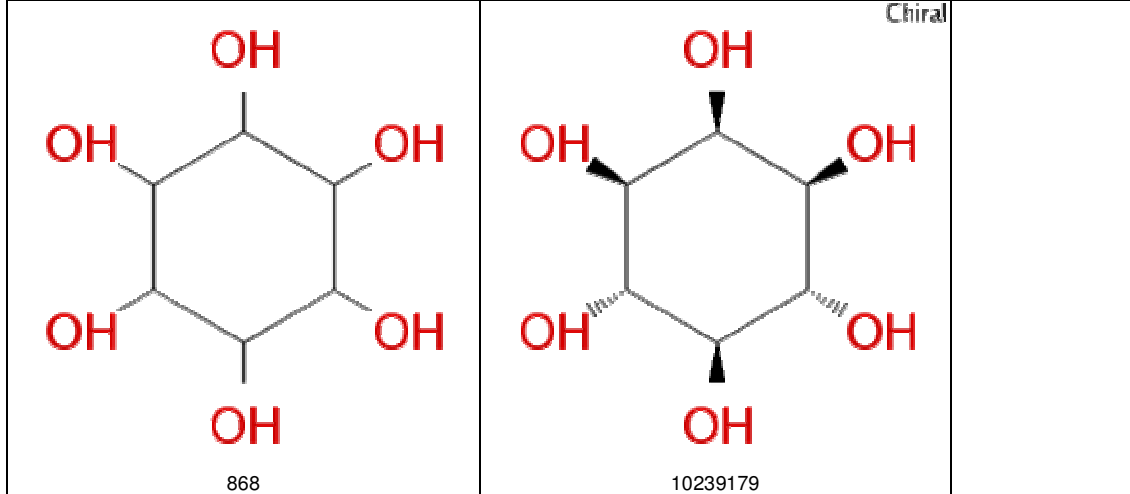

**Name: myristoleic acid**

|                                                                                                |                                                                                                   |  |
|------------------------------------------------------------------------------------------------|---------------------------------------------------------------------------------------------------|--|
|  <p>61639</p> |  <p>4444564</p> |  |
|------------------------------------------------------------------------------------------------|---------------------------------------------------------------------------------------------------|--|

**Name: 3-ketosphinganine**

|                                                                                              |                                                                                                                |  |
|----------------------------------------------------------------------------------------------|----------------------------------------------------------------------------------------------------------------|--|
|  <p>611</p> | <p>Chiral</p>  <p>388895</p> |  |
|----------------------------------------------------------------------------------------------|----------------------------------------------------------------------------------------------------------------|--|

**Name: Saccharopine**

|                                                                                                 |                                                                                                                  |  |
|-------------------------------------------------------------------------------------------------|------------------------------------------------------------------------------------------------------------------|--|
| 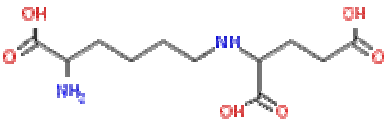 <p>1056</p> | <p>Chiral</p>  <p>141086</p> |  |
|-------------------------------------------------------------------------------------------------|------------------------------------------------------------------------------------------------------------------|--|

**Name: palmitoyl-CoA**



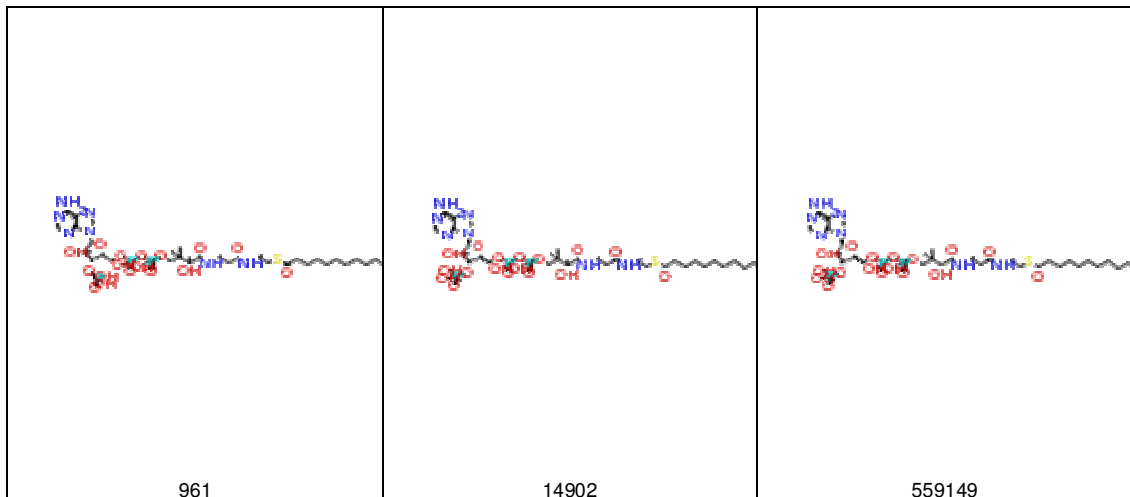

**Name: lauroyl-CoA**

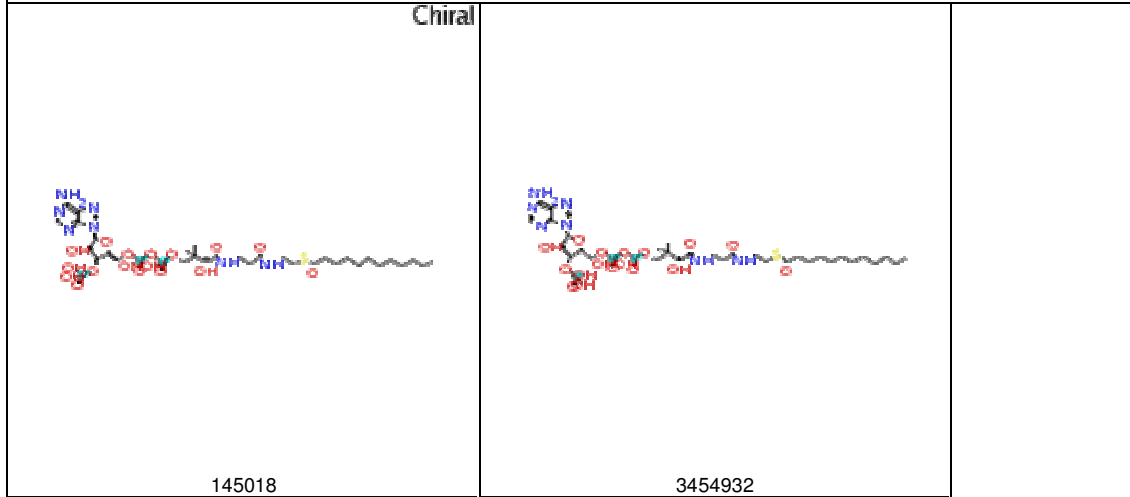

**Name: N-acetylornithine**

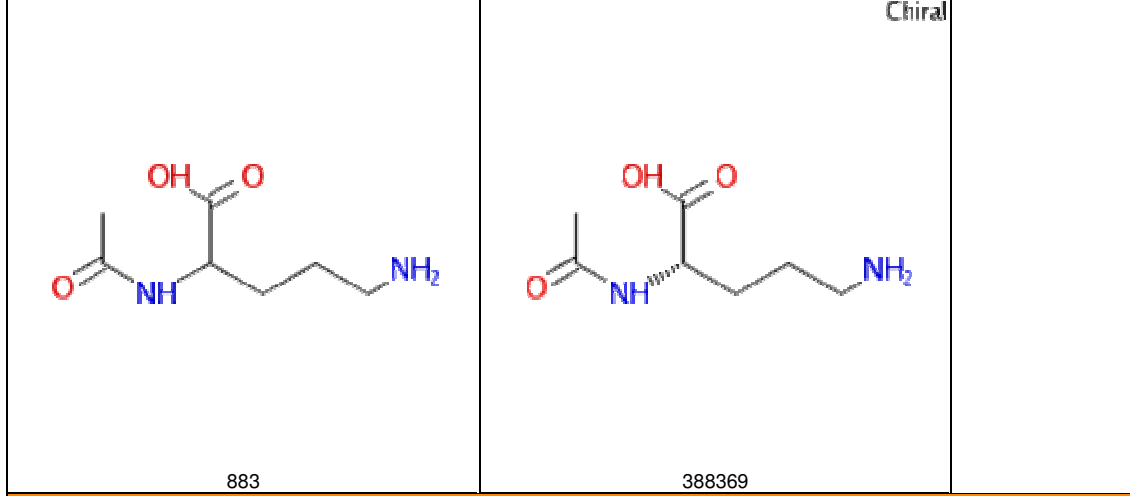

**Name: S-adenosyl-L-homocysteine**

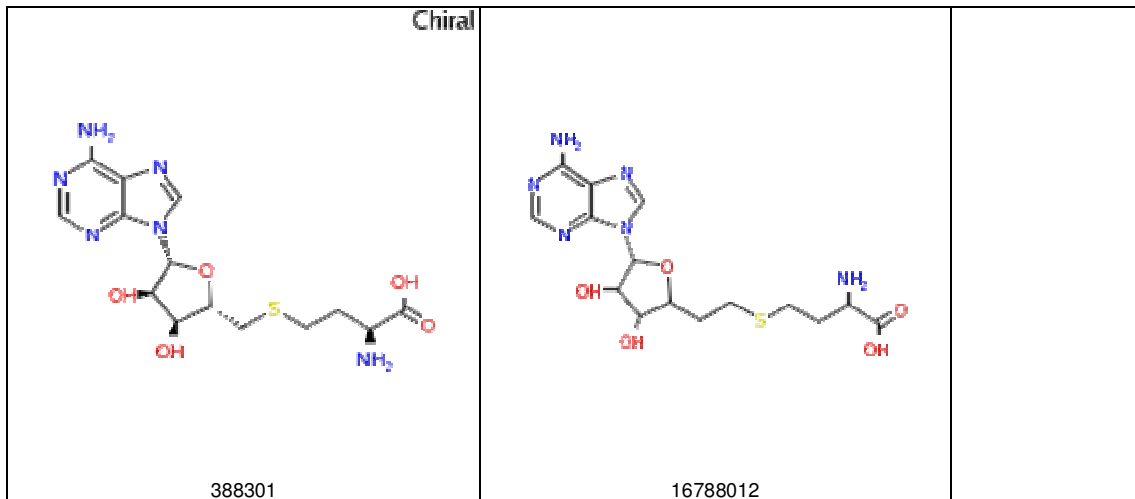

**Name: S-adenosyl-L-homocysteine**

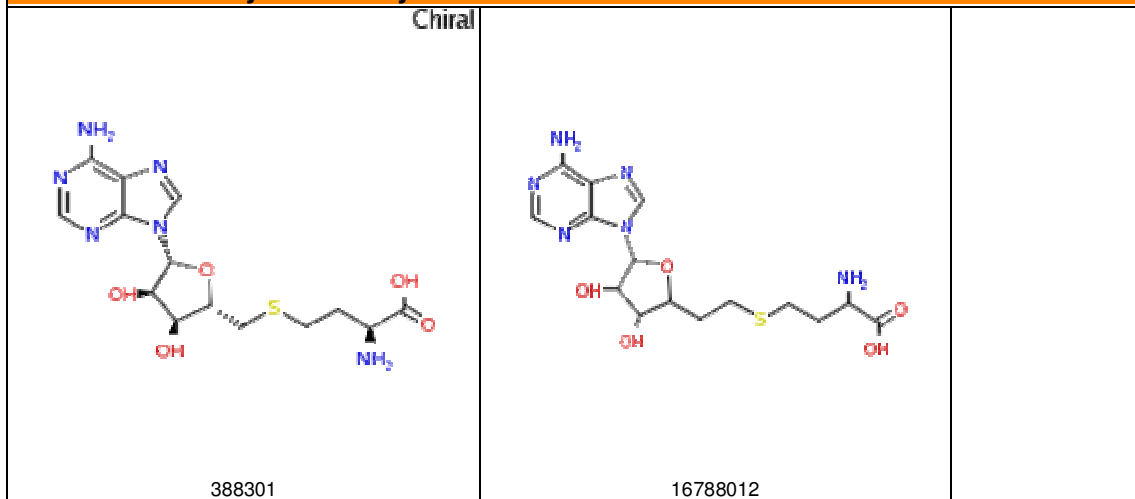

**Name: adenosine triphosphate**

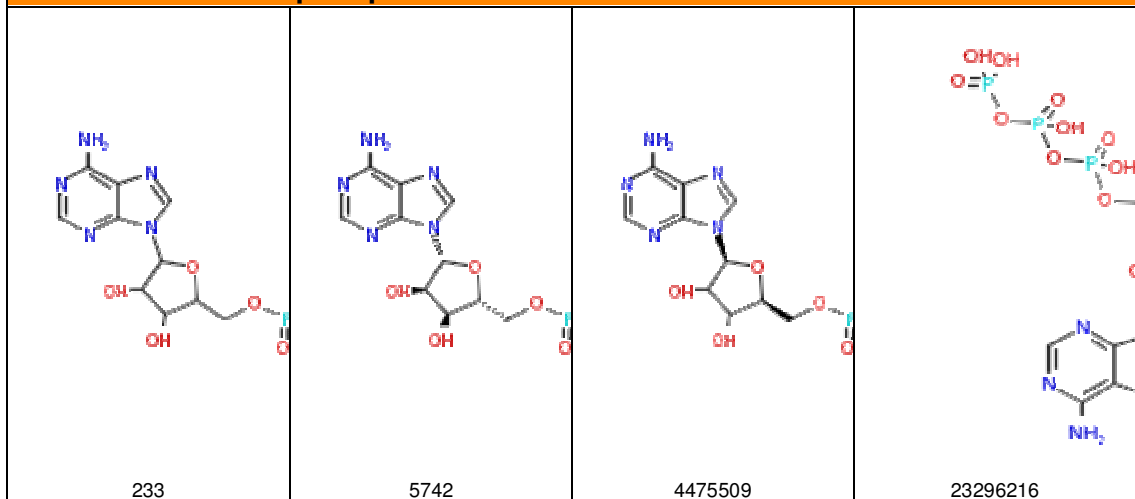

**Name: 1L-myo-inositol 1-phosphate**



**Name: 1L-myo-inositol 1-phosphate**

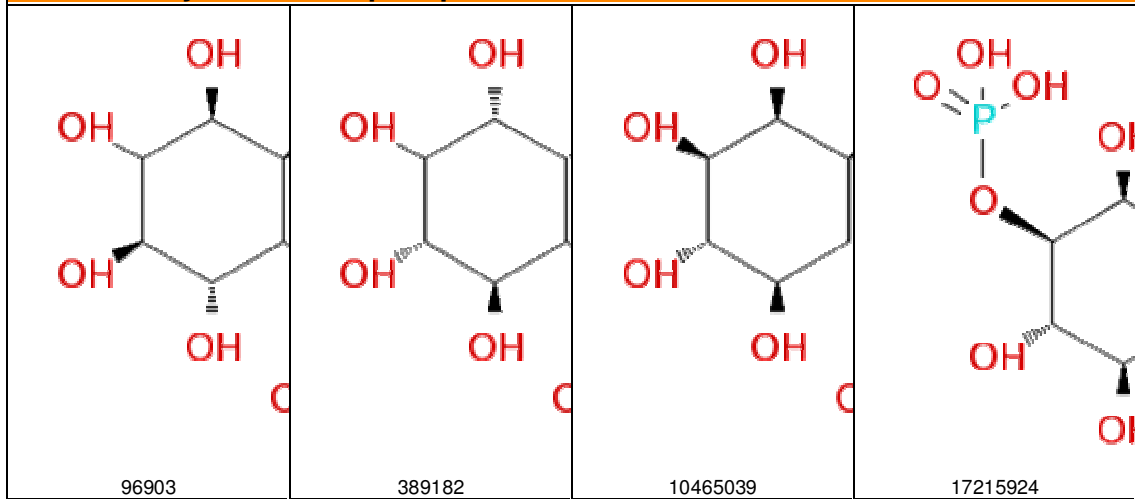

**Name: arachidonic acid**

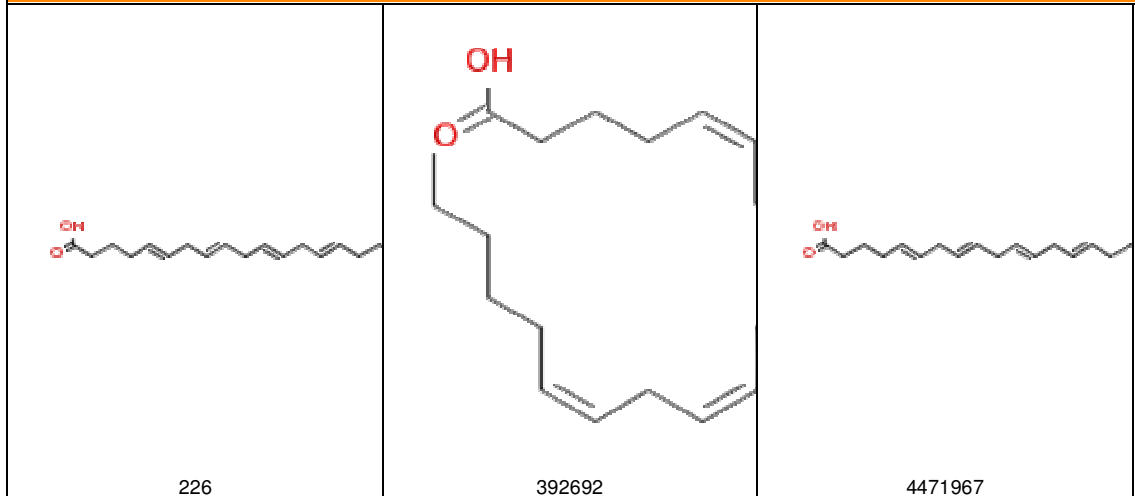

**Name: glycerol-3-phosphate**

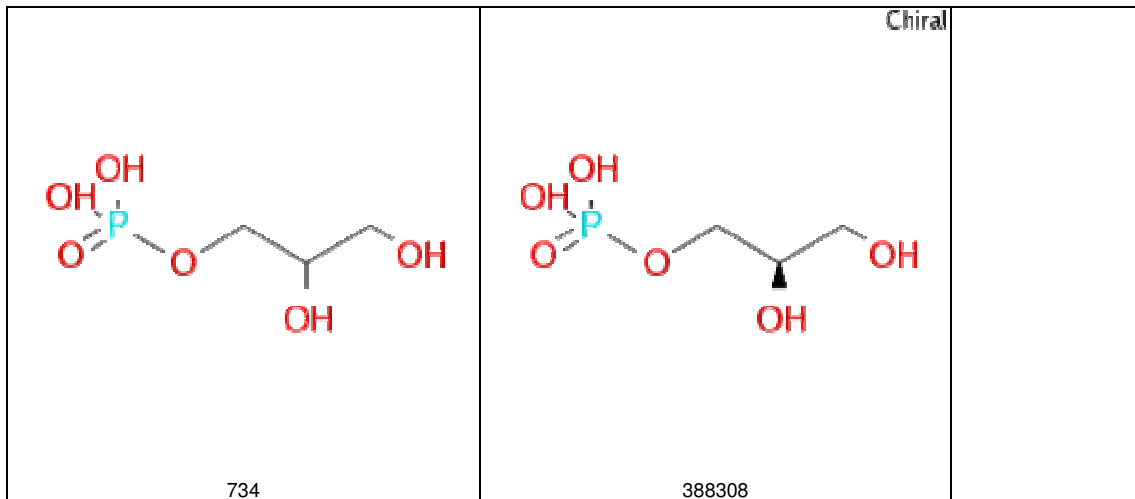

**Name: thiamin monophosphate**

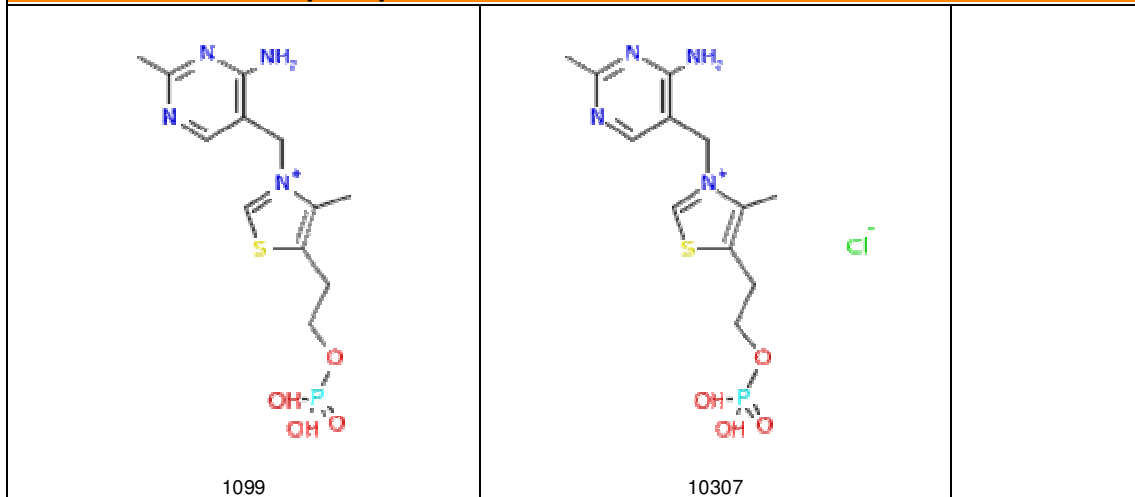

**Name: Nicotinamide riboside**

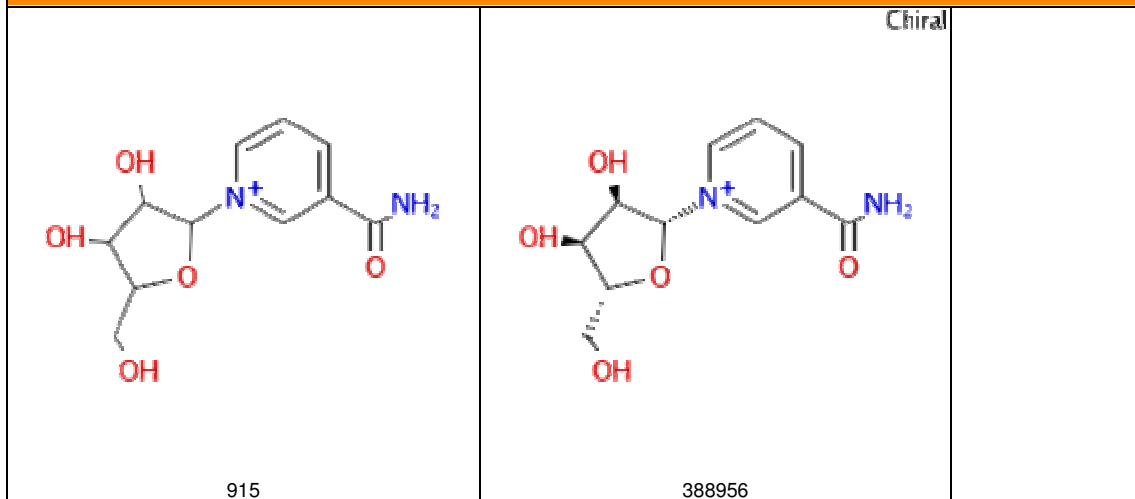

**Name: p-coumaric acid**

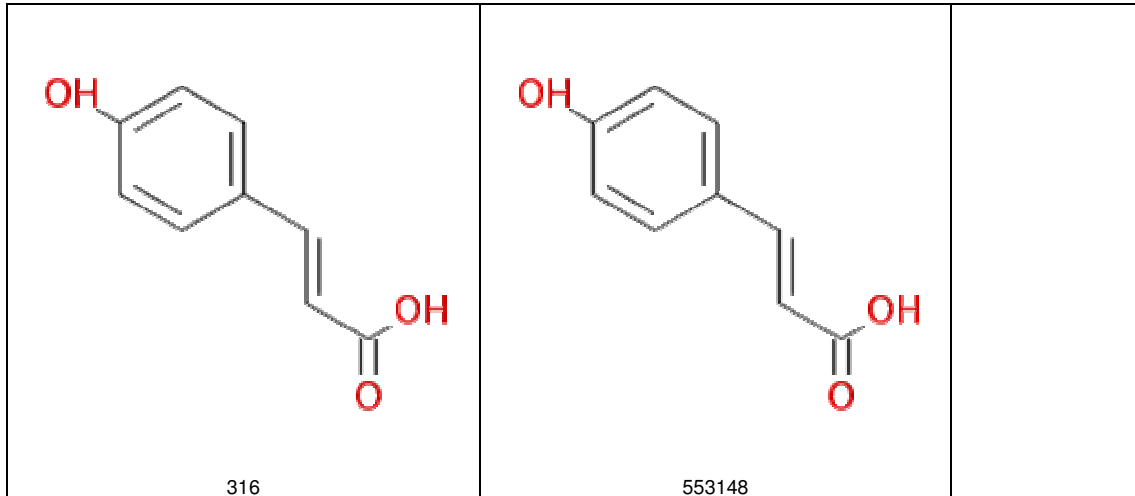

**Name: Potassium**

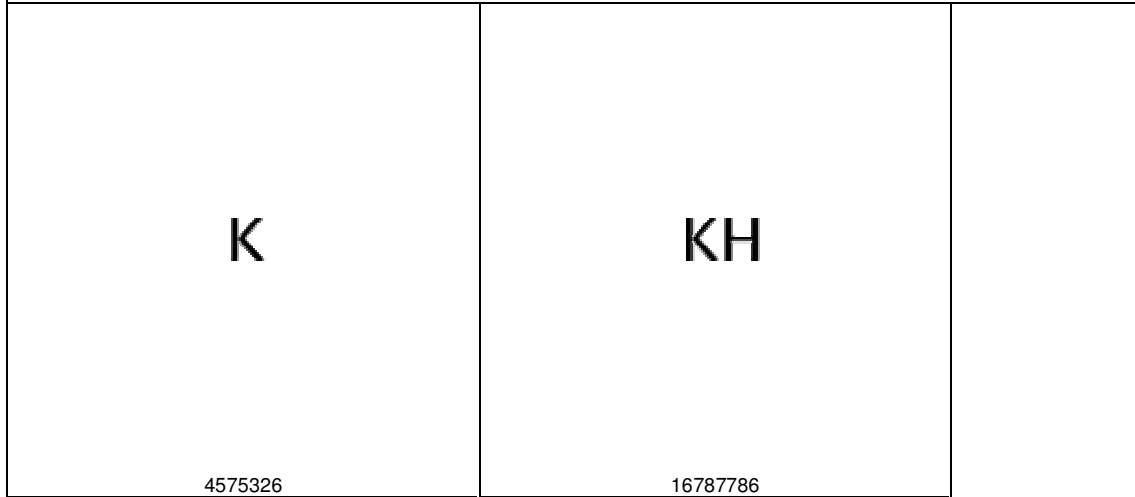

**Name: Maltose**

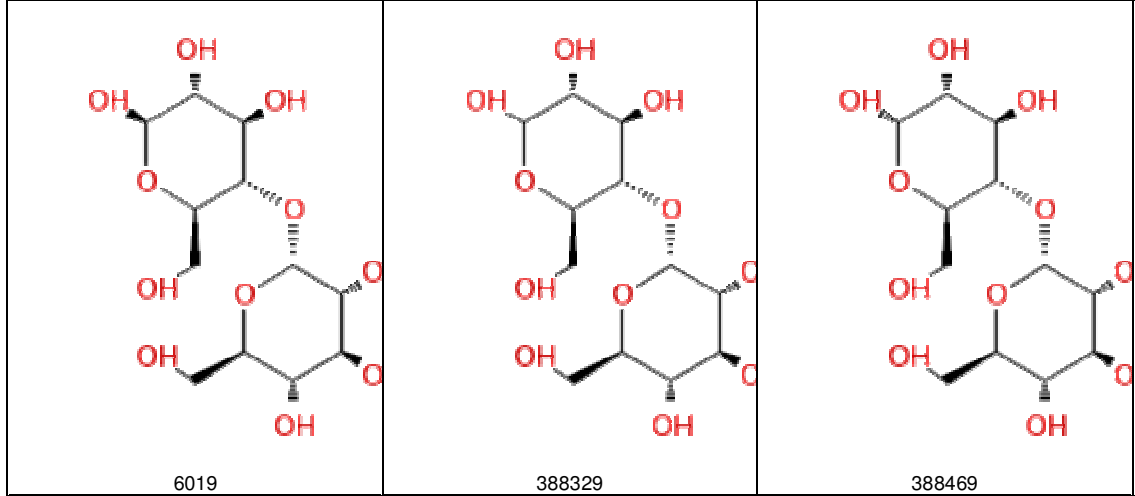

**Name: Ceramide**

|                                                                                     |                                                                                     |                                                                                     |                                                                                    |                                                                                     |
|-------------------------------------------------------------------------------------|-------------------------------------------------------------------------------------|-------------------------------------------------------------------------------------|------------------------------------------------------------------------------------|-------------------------------------------------------------------------------------|
|    |    |    |  |  |
| 4446675                                                                             | 4446676                                                                             | 4446677                                                                             | 4446678                                                                            | 4446679                                                                             |
|    |    |    |  |  |
| 4446680                                                                             | 4446681                                                                             | 4446682                                                                             | 4446683                                                                            | 4446684                                                                             |
|  |  |  |                                                                                    |                                                                                     |
| 4451374                                                                             | 4593710                                                                             | 7826144                                                                             |                                                                                    |                                                                                     |
| <b>Name: 1-palmitoyl-2-oleoyl-sn-glycero-3-phosphocholine</b>                       |                                                                                     |                                                                                     |                                                                                    |                                                                                     |

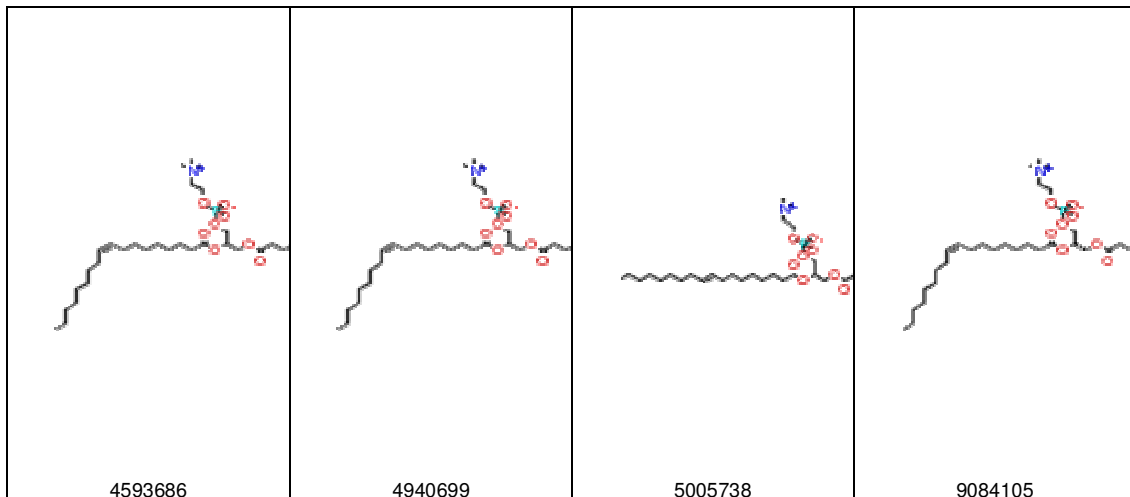

**Name: Ferulic acid**

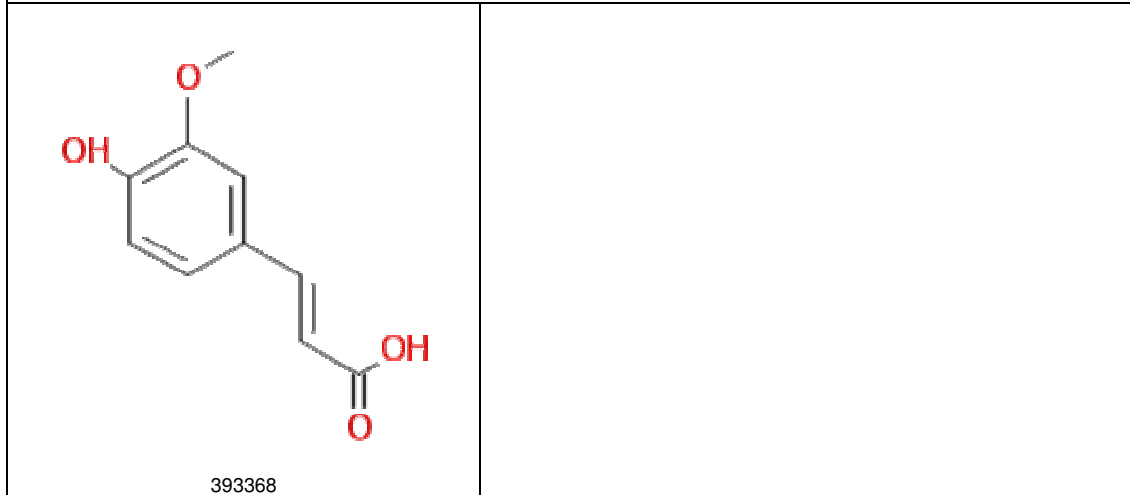

**Name: glutathione disulfide**

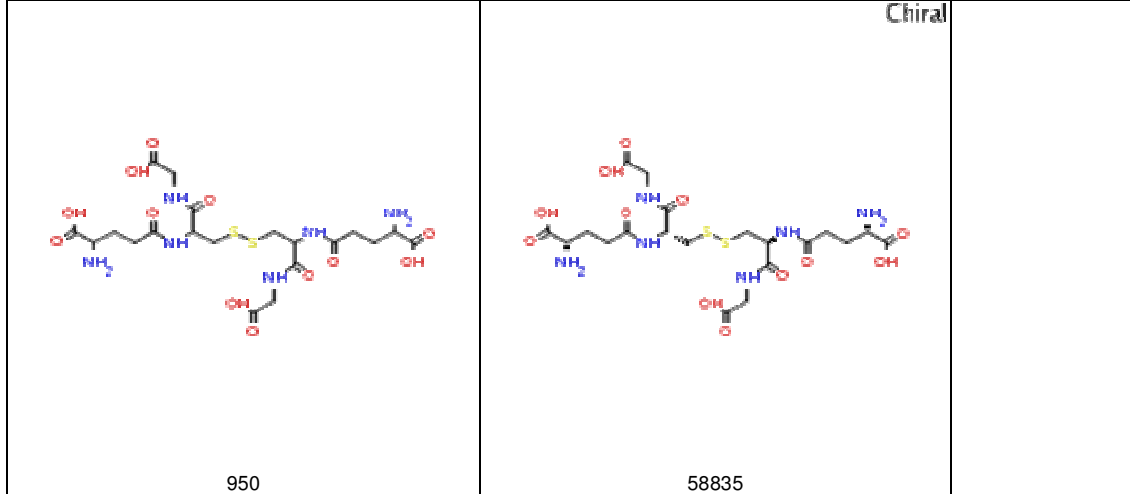

**Name: Dolichol**

|                                                                                   |                                                                                    |  |
|-----------------------------------------------------------------------------------|------------------------------------------------------------------------------------|--|
|  |  |  |
| 4444050                                                                           | 4938490                                                                            |  |

**Name: Selenomethionine**

|                                                                                    |                                                                                                                              |  |
|------------------------------------------------------------------------------------|------------------------------------------------------------------------------------------------------------------------------|--|
| 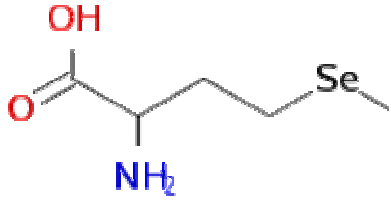 | <p style="text-align: right;">Chiral</p>  |  |
| 14375                                                                              | 94765                                                                                                                        |  |

**Name: L-malic acid**

|                                                                                     |                                                                                                                               |  |
|-------------------------------------------------------------------------------------|-------------------------------------------------------------------------------------------------------------------------------|--|
| 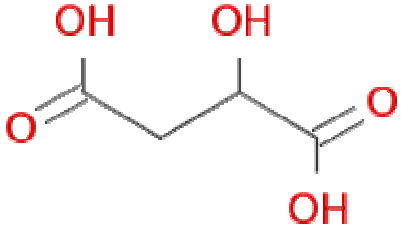 | <p style="text-align: right;">Chiral</p>  |  |
| 510                                                                                 | 193317                                                                                                                        |  |

**Name: Biotin**



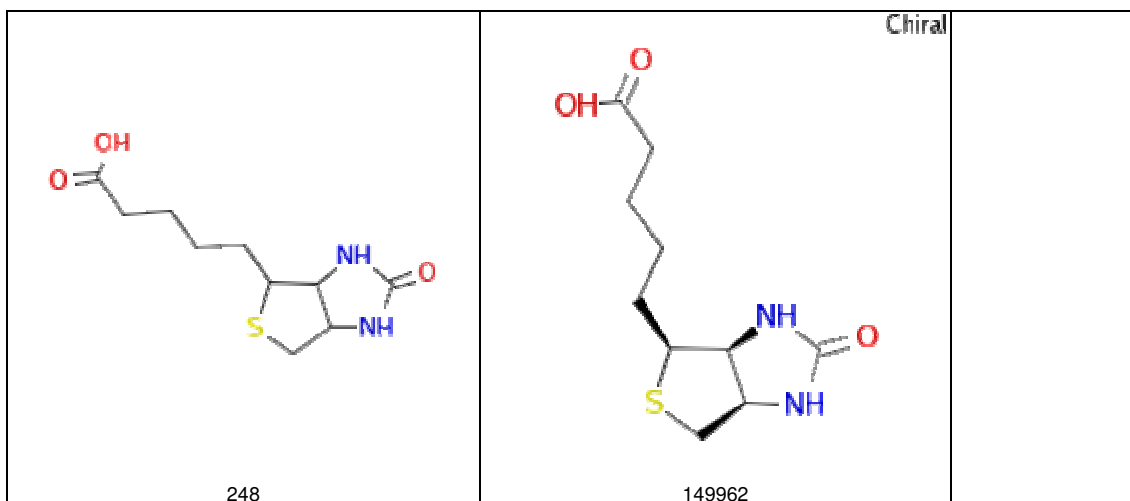

**Name: alpha-linolenic acid**

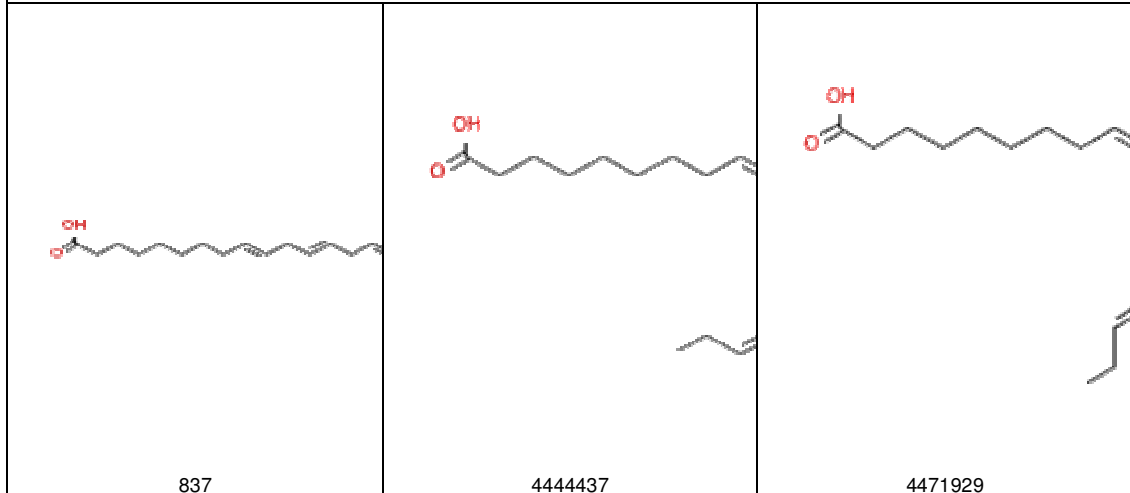

**Name: polygalacturonic acid**

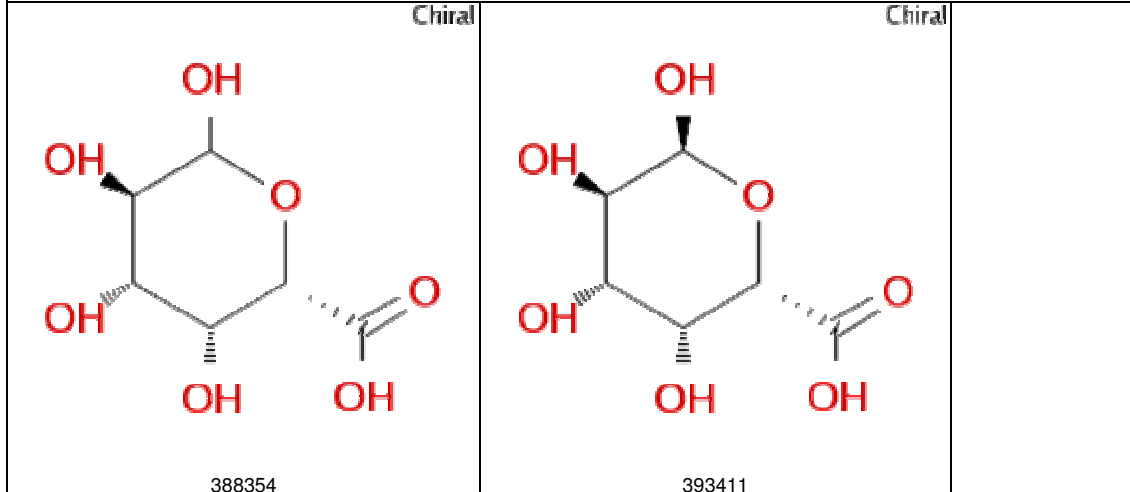

**Name: CDP-ethanolamine**

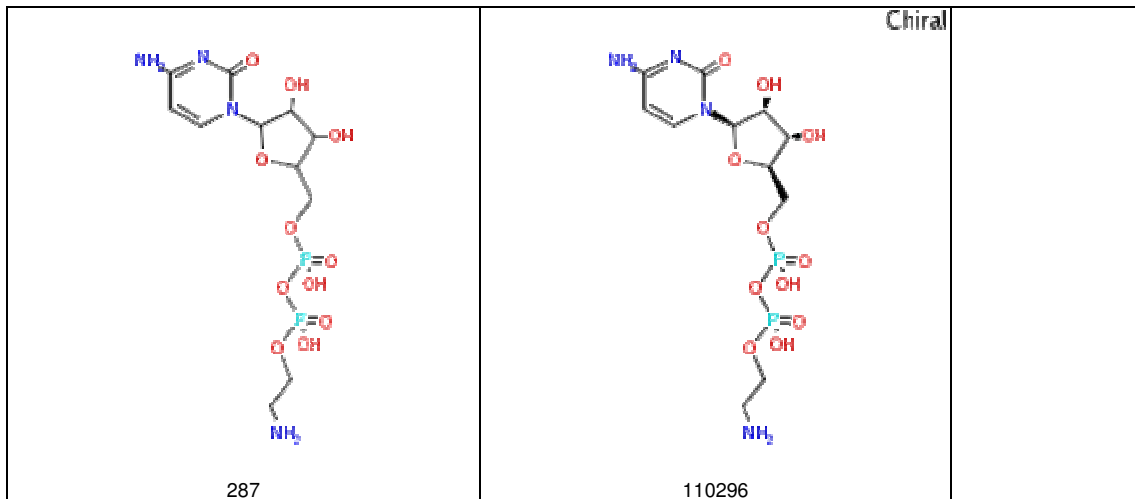

**Name: dihydro-gamma-linolenic acid**

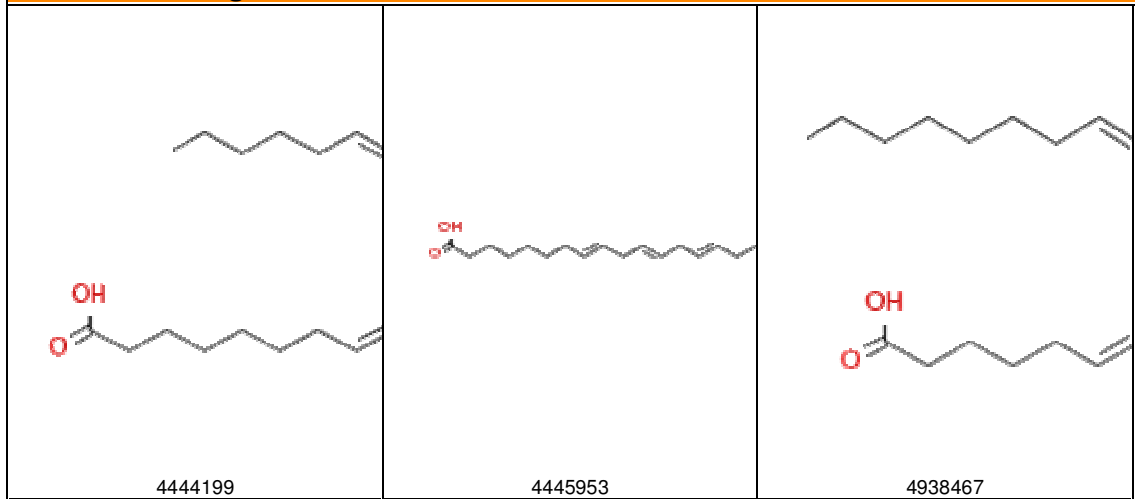

**Name: Riboflavin**

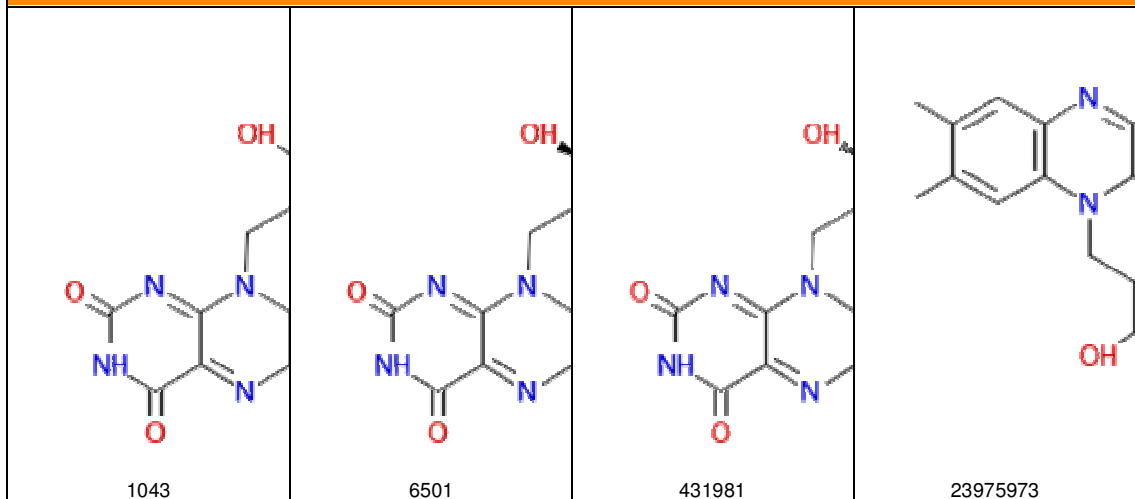

**Name: L-canavanine**

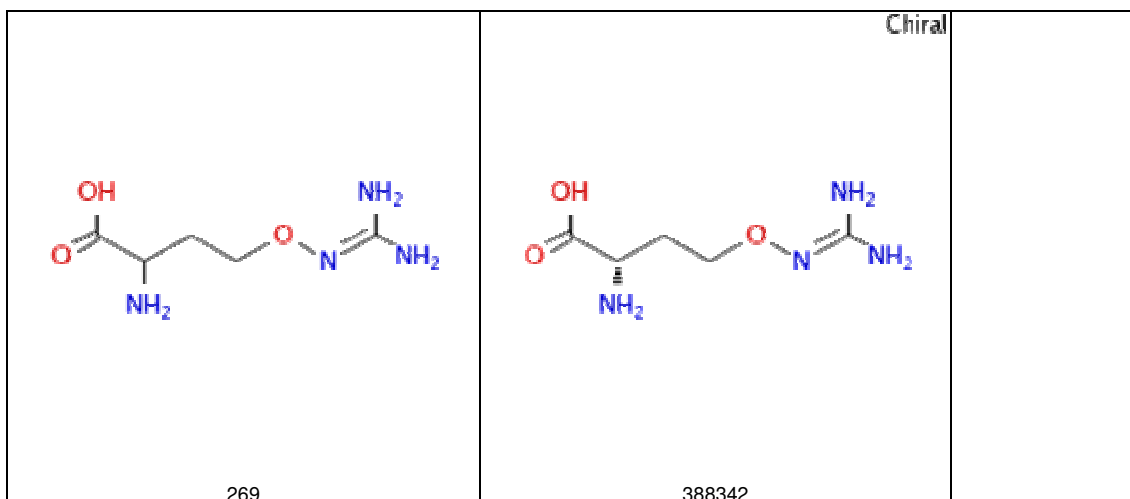

**Name: L-glutamic acid**

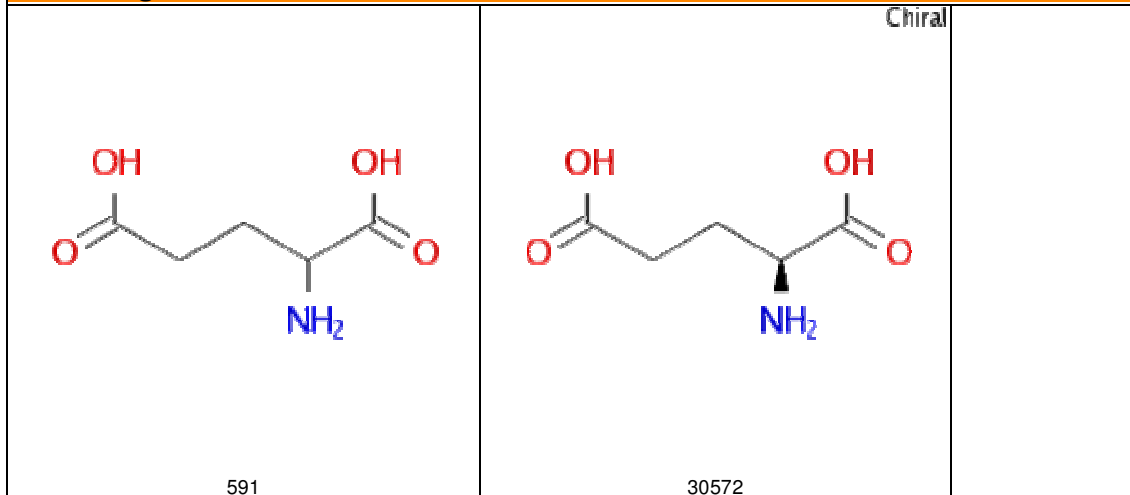

**Name: caffeic acid**

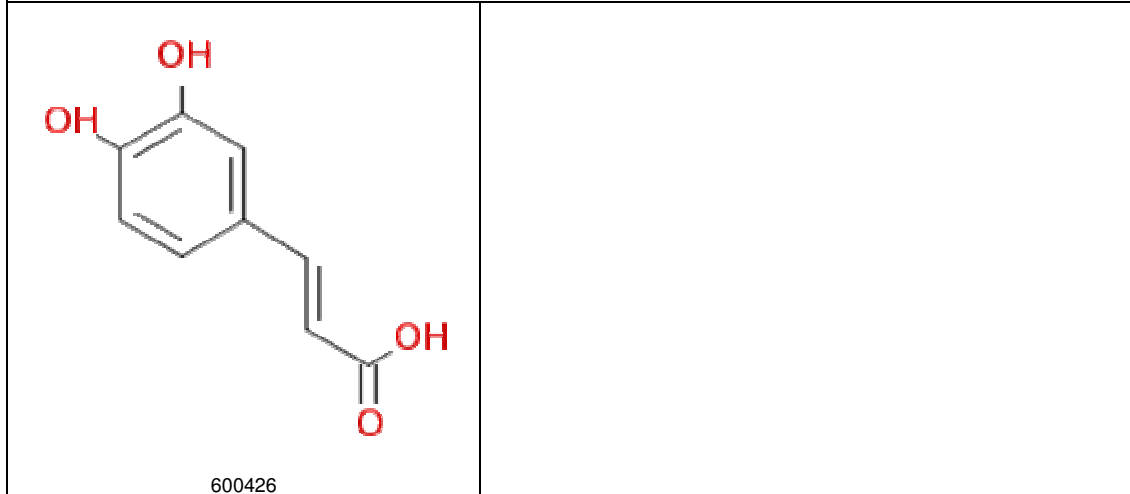

**Name: Stearidonic acid**

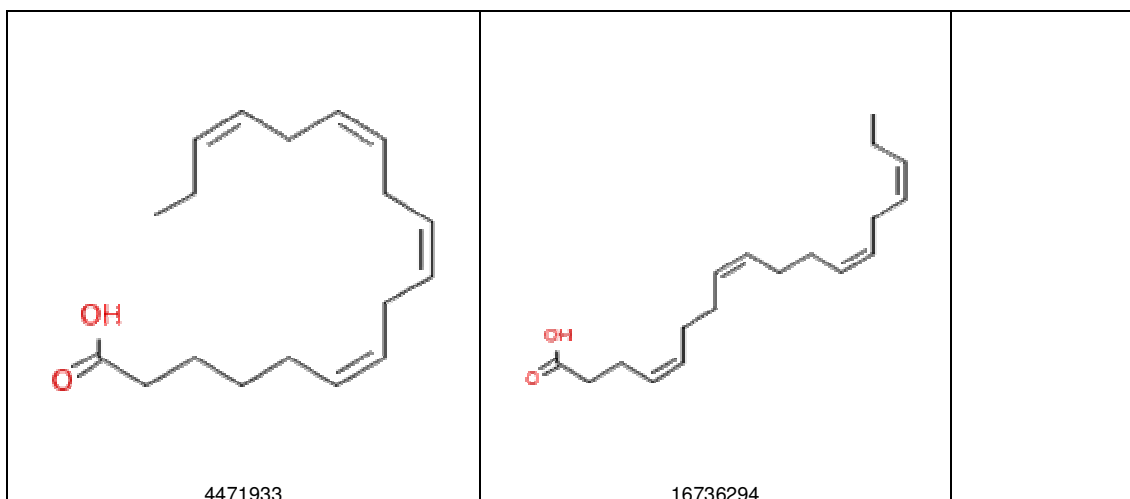

**Name: Fusidic acid**

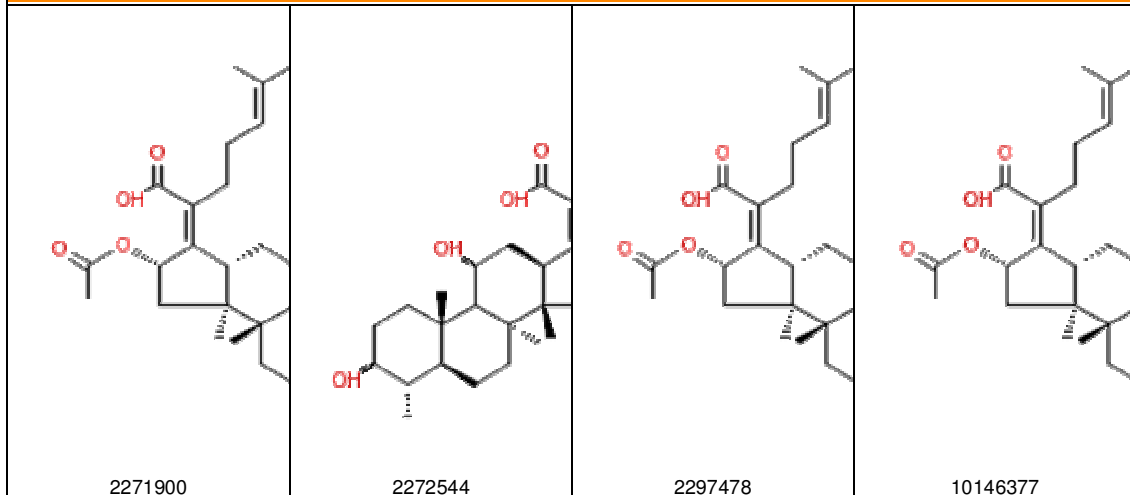

**Name: gamma-linolenic acid**

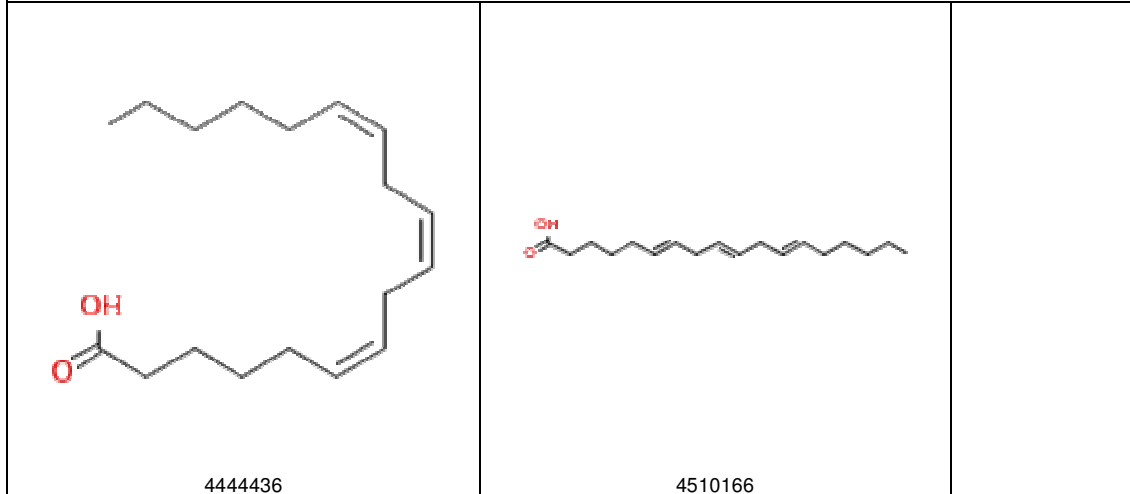

**Name: dTTP**

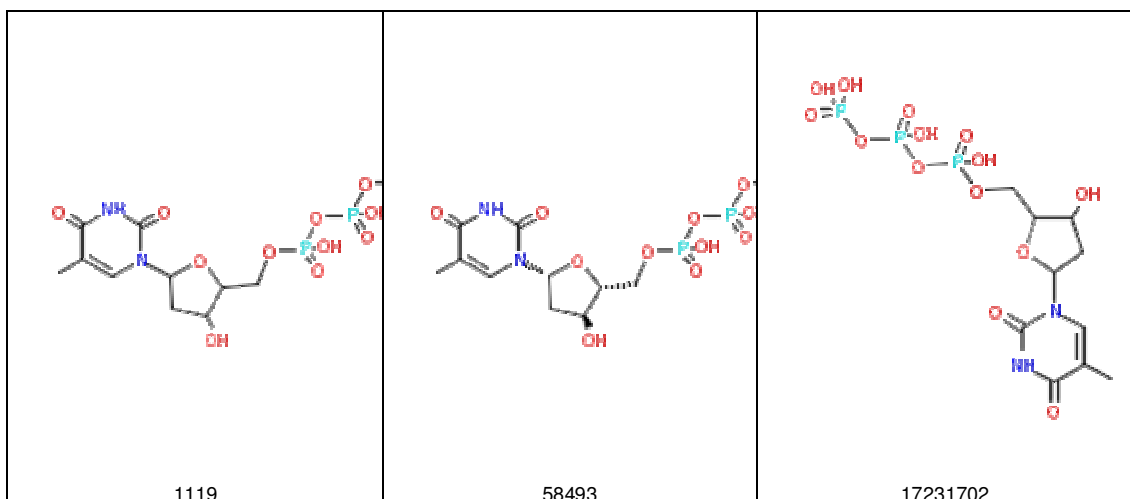

**Name: succinyl-CoA**

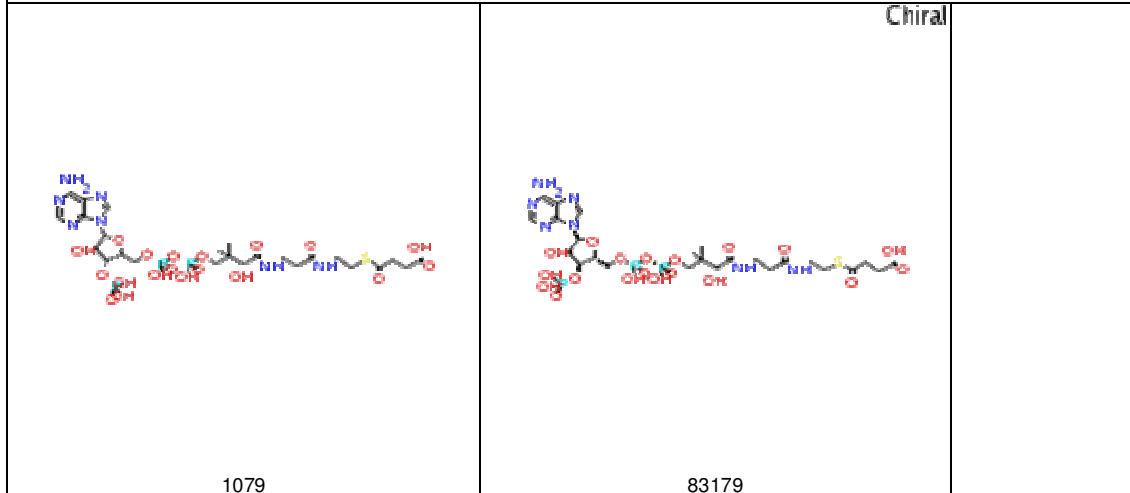

**Name: alpha-aminoadipic delta-semialdehyde**

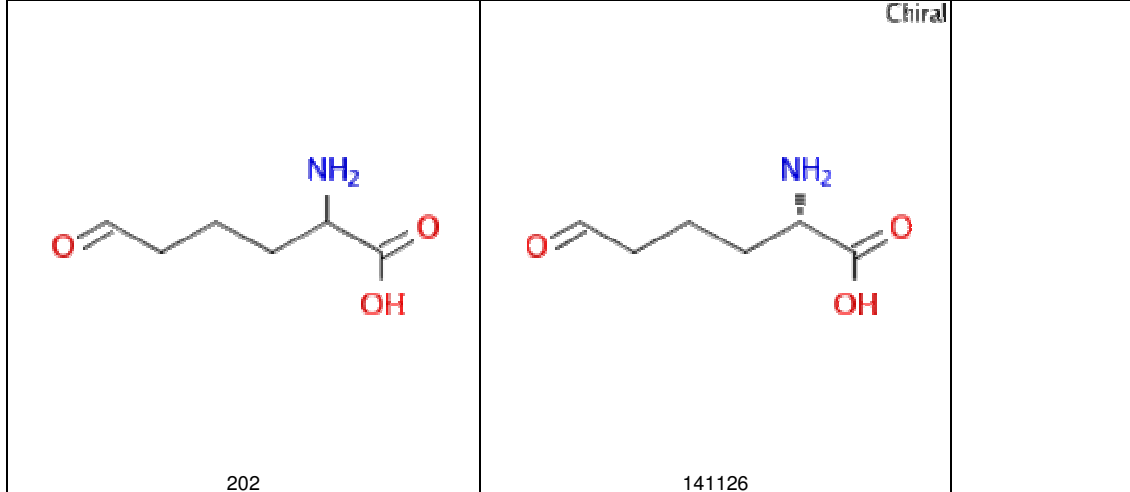

**Name: uridylate**

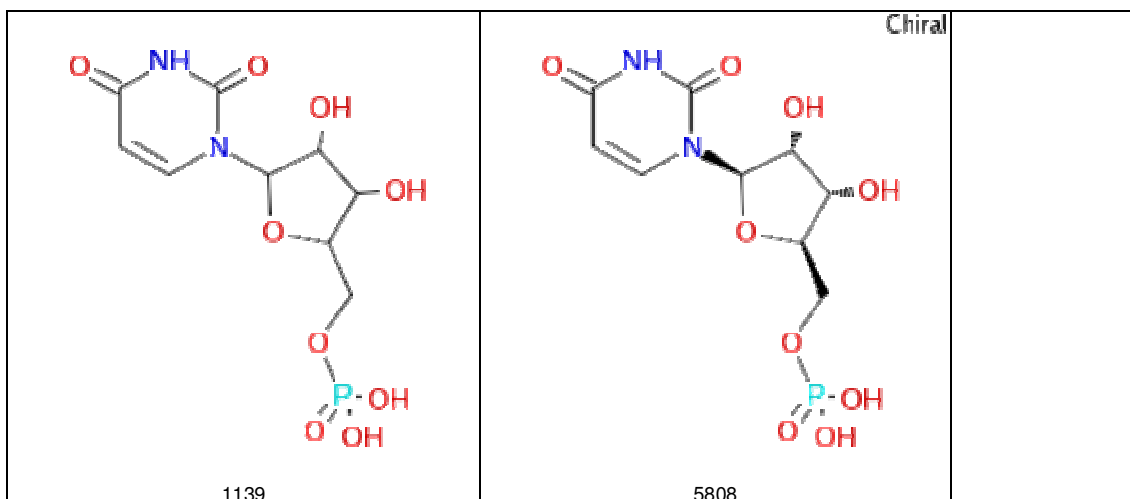

**Name: Adenylate**

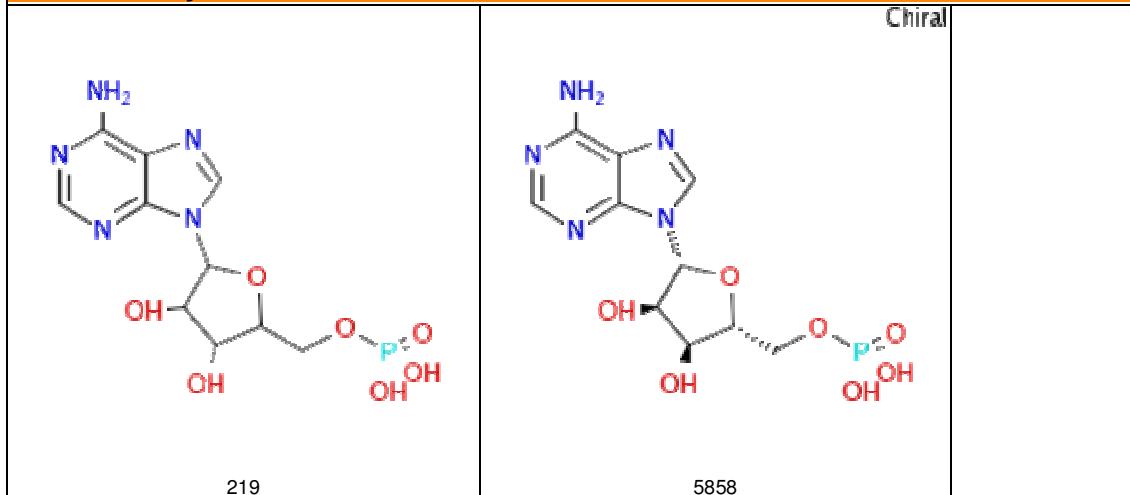

**Name: ADENYLATE**

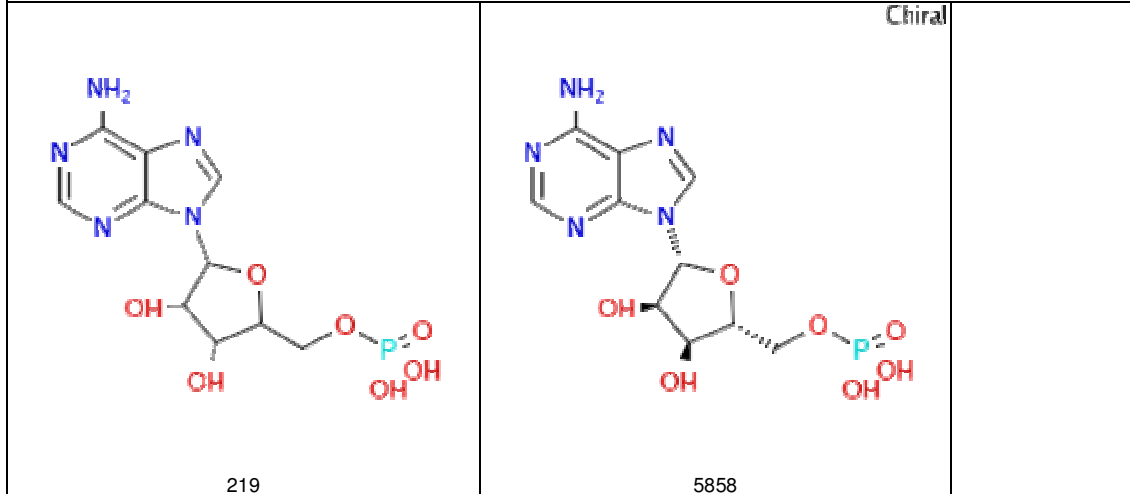

**Name: 7-dehydrocholesterol**

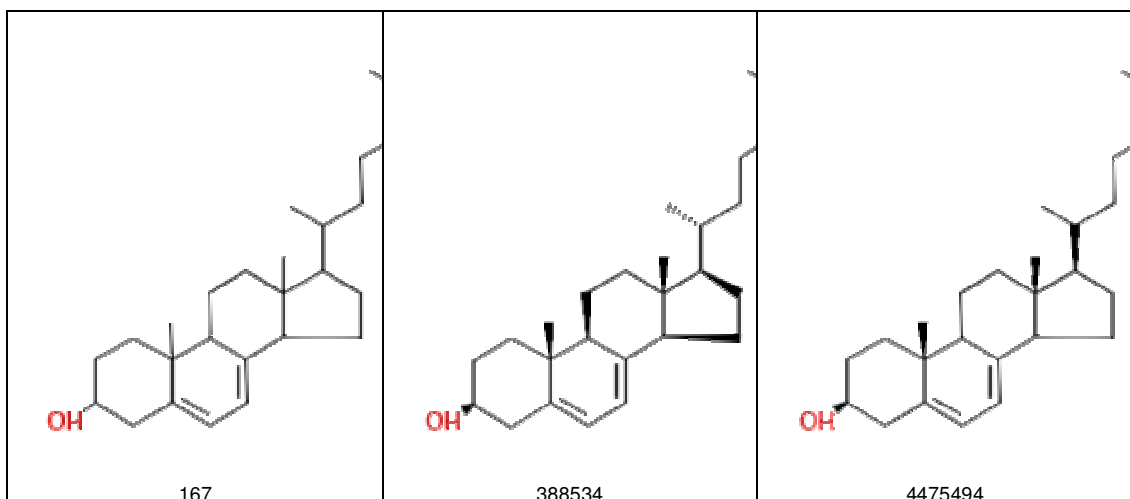

**Name: ursolic acid**

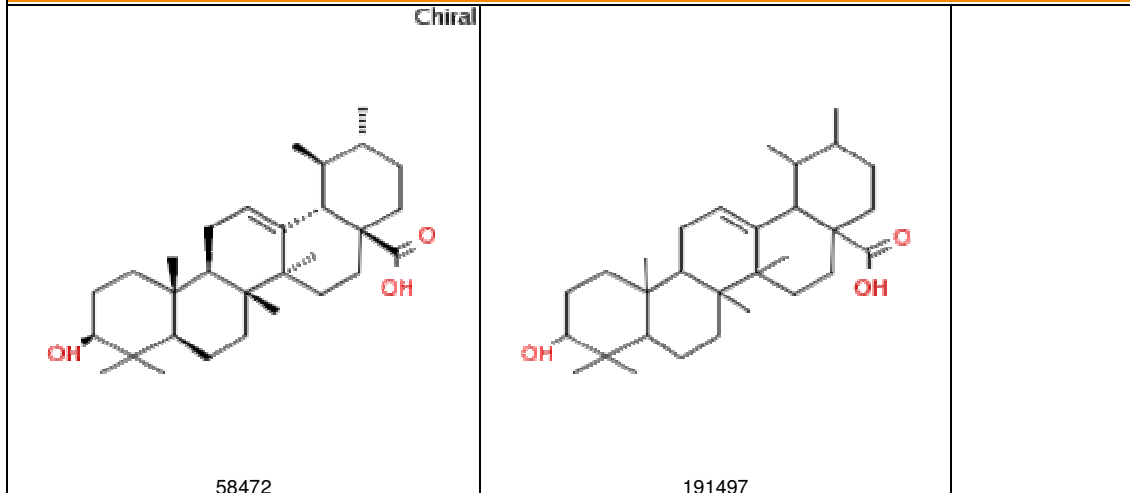

**Name: Pipecolic acid**

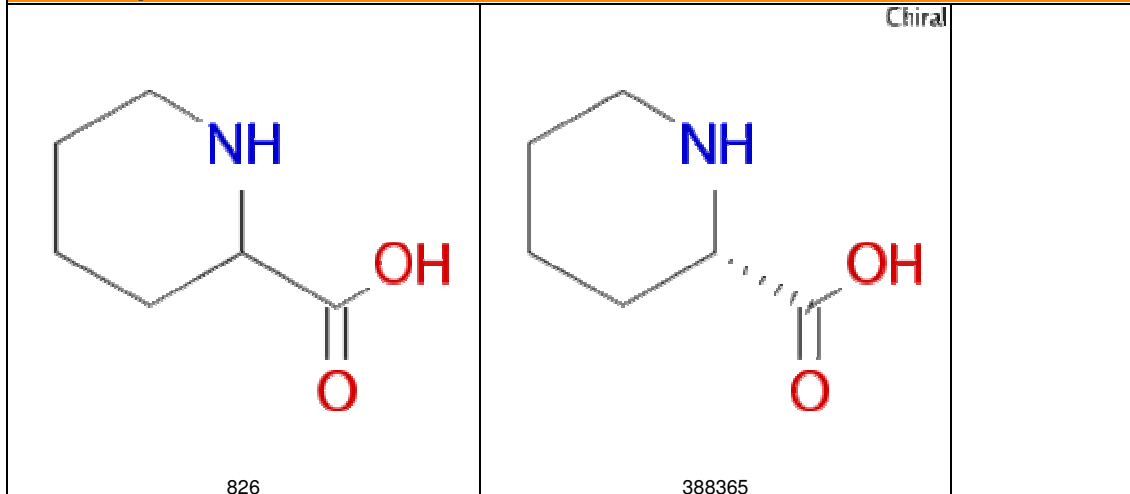

**Name: dihydrolipoic acid**

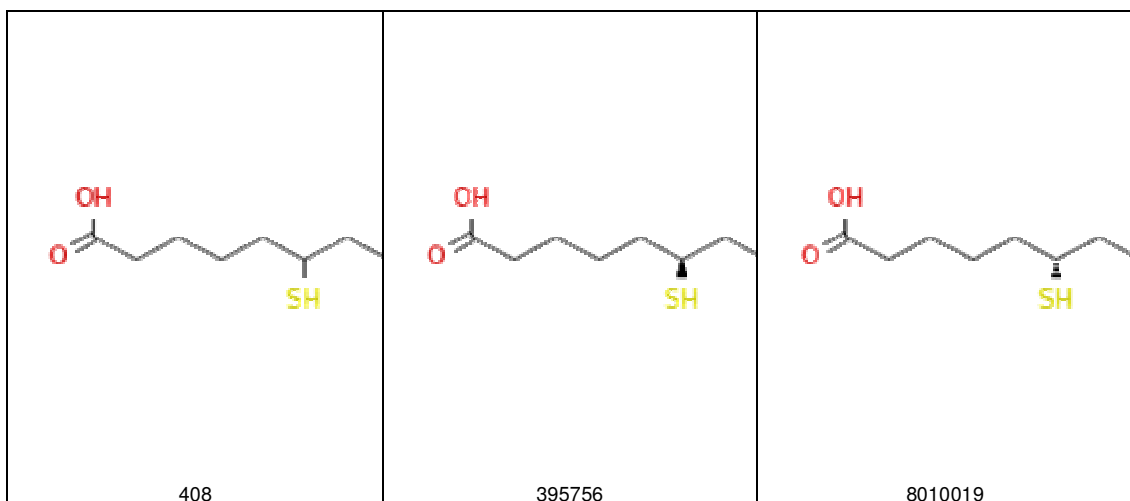

**Name: canavanine**

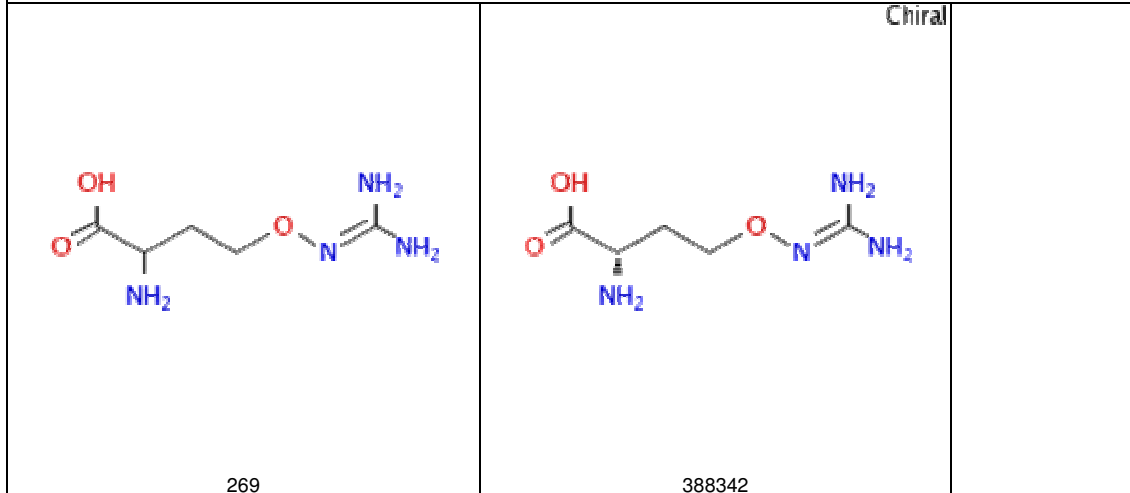

**Name: Phosphatidylethanolamine**

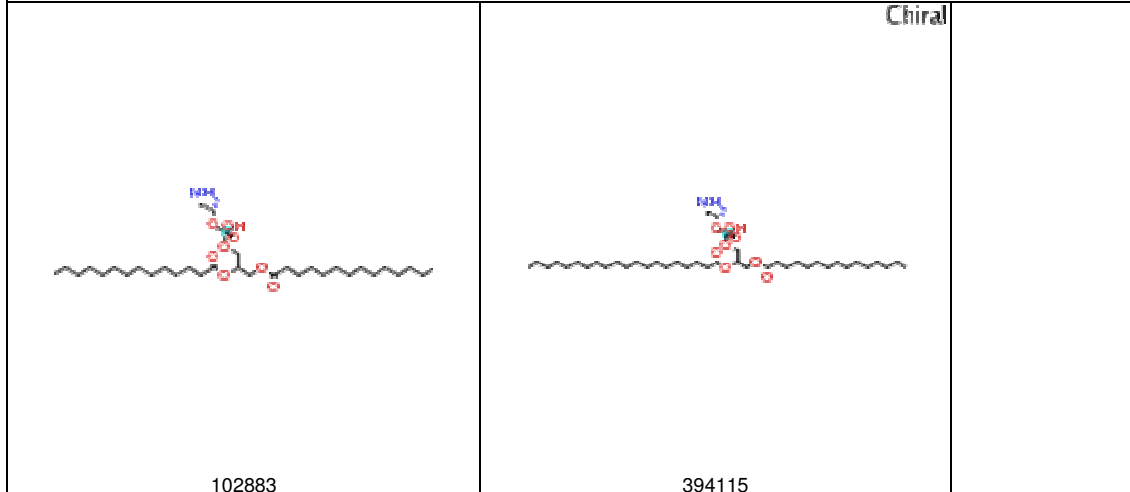

**Name: D-galactose 1-phosphate**



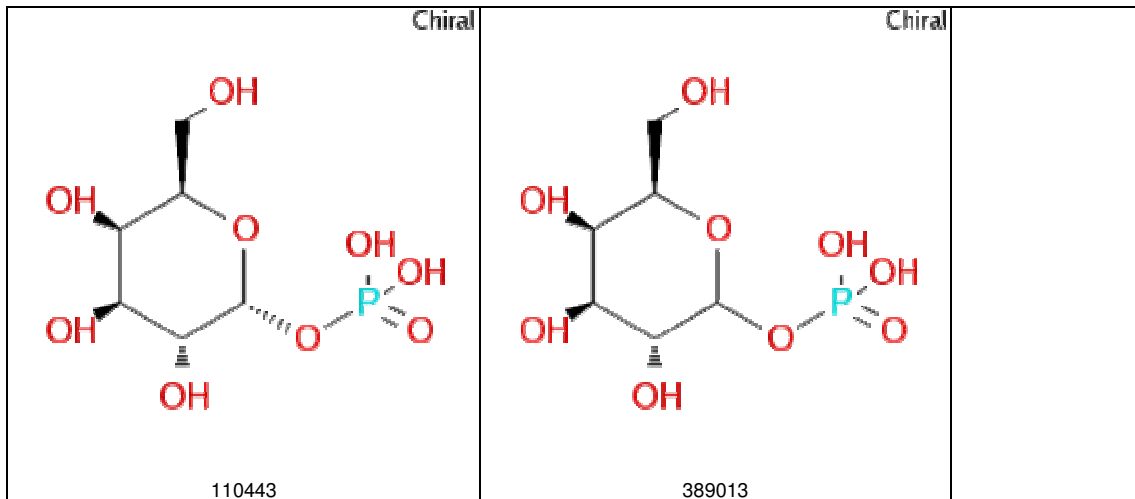

**Name: 3-ketodihydrospingosine**

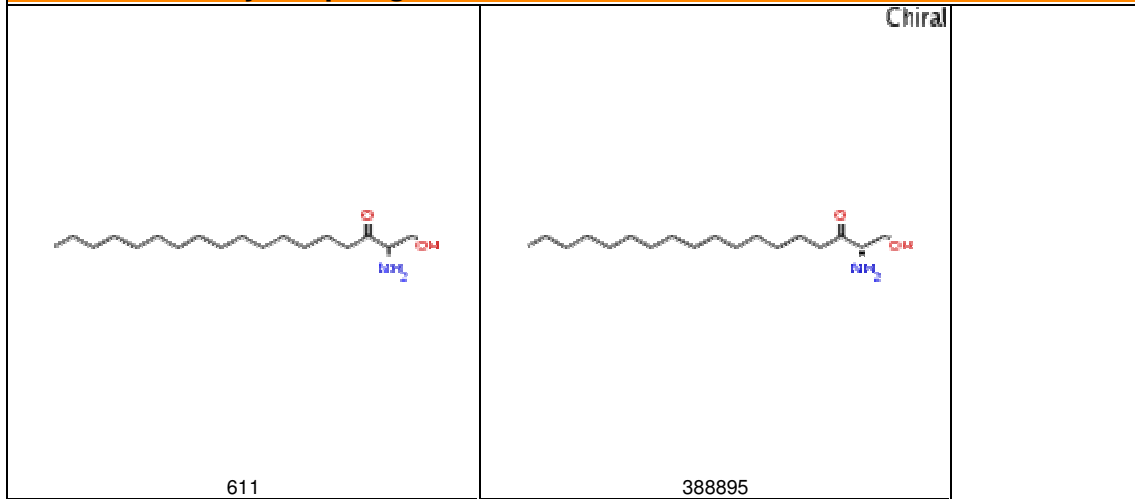

**Name: N-phosphonacetyl-L-aspartate**

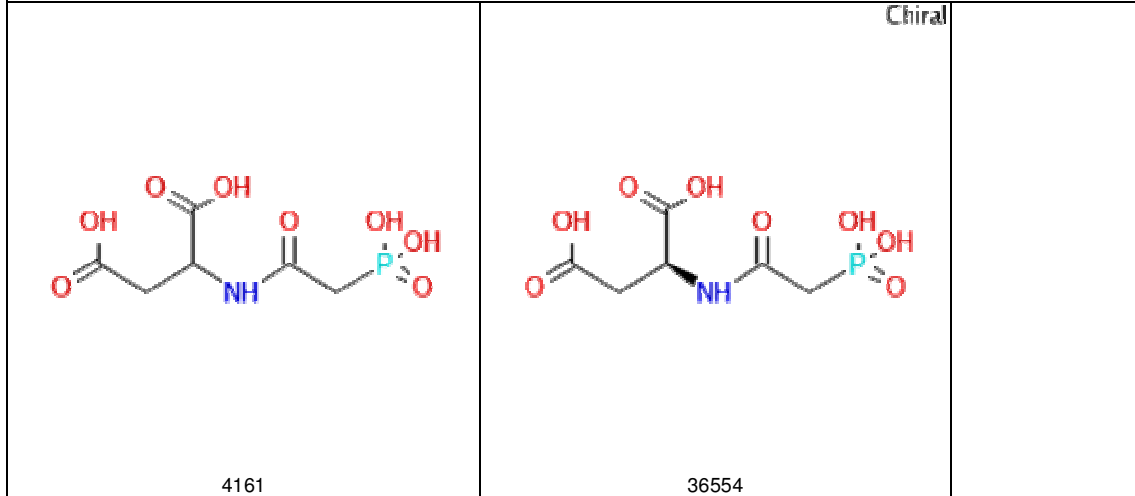

**Name: cinnamaldehyde**

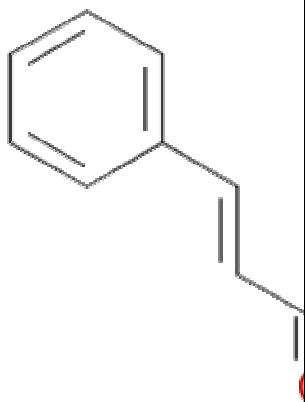

301

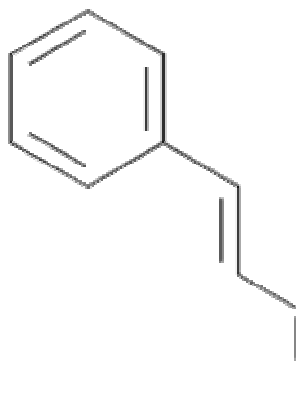

553117

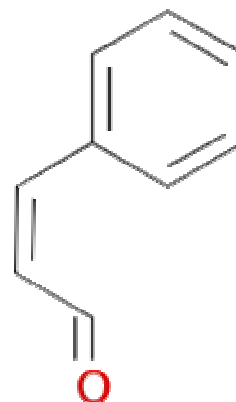

4934372

**Name: beta-estradiol**

Chiral

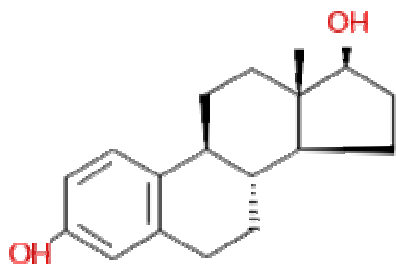

5554

Chiral

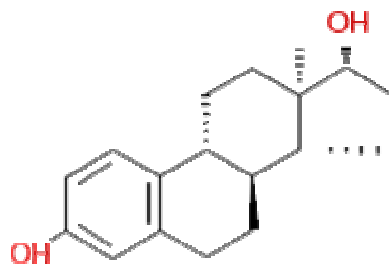

580891

**Name: beta-Estradiol**

Chiral

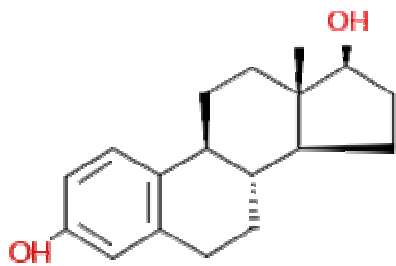

5554

Chiral

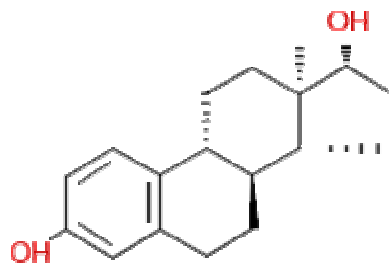

580891

**Name: inositol 1,2,3,4,5,6-hexakisphosphate**

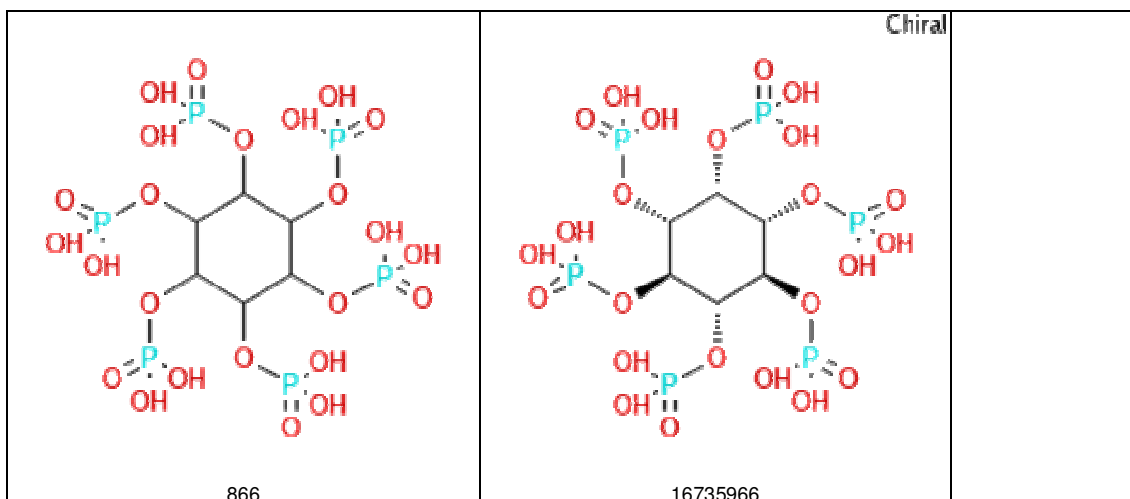

Name: alpha-aminoadipic semialdehyde

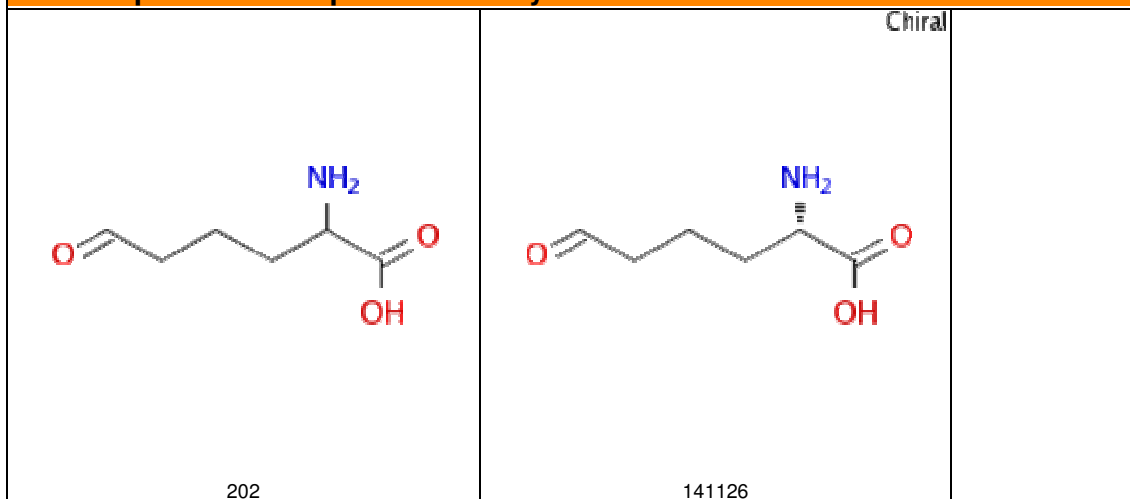

Name: xanthosine

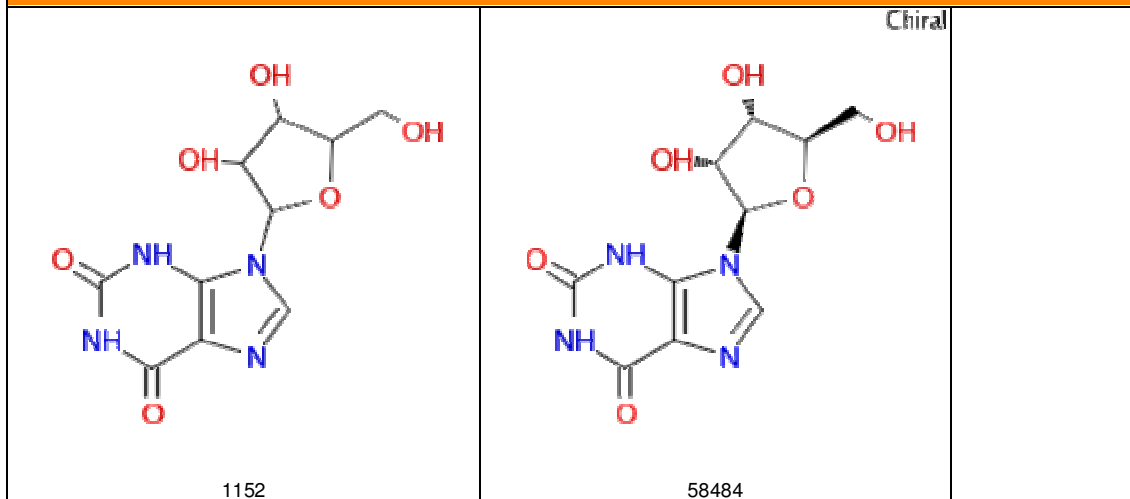

Name: Hypusine

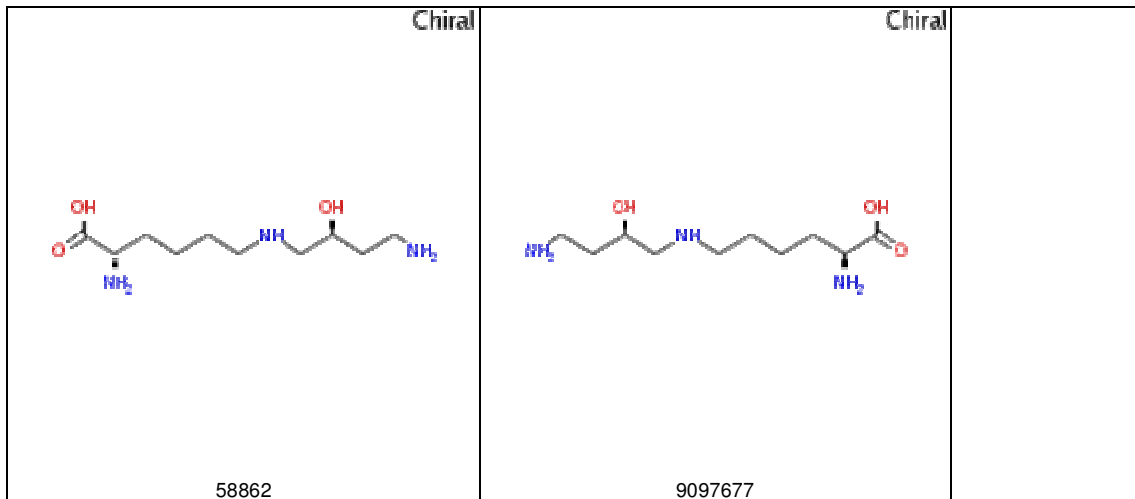

**Name: phosphorylcholine**

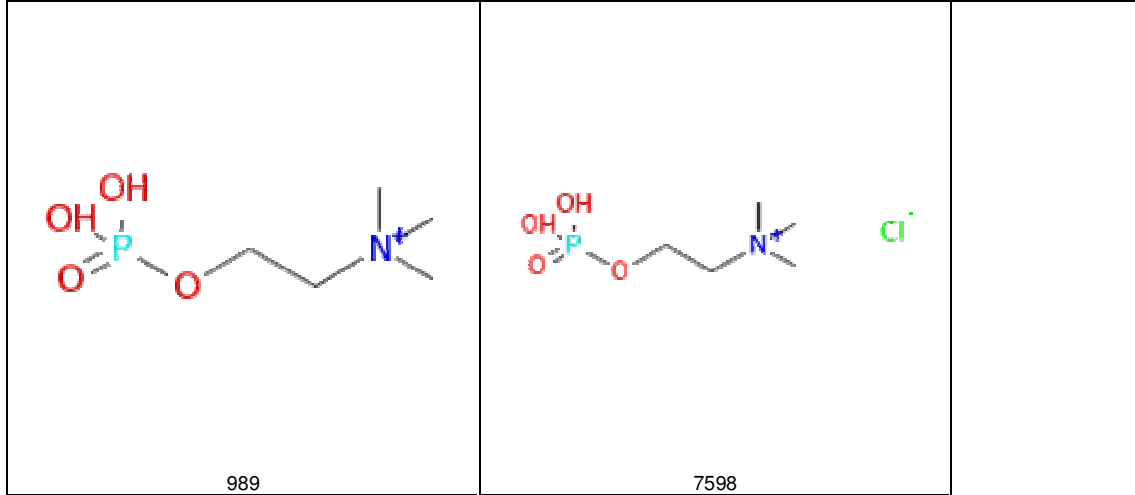

**Name: cholic acid**

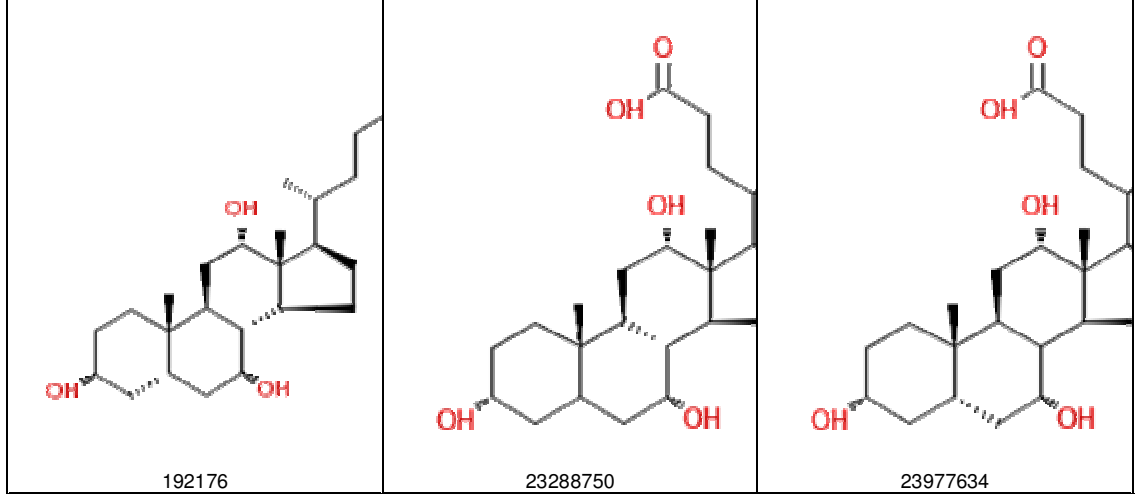

**Name: alpha-tocopherol**

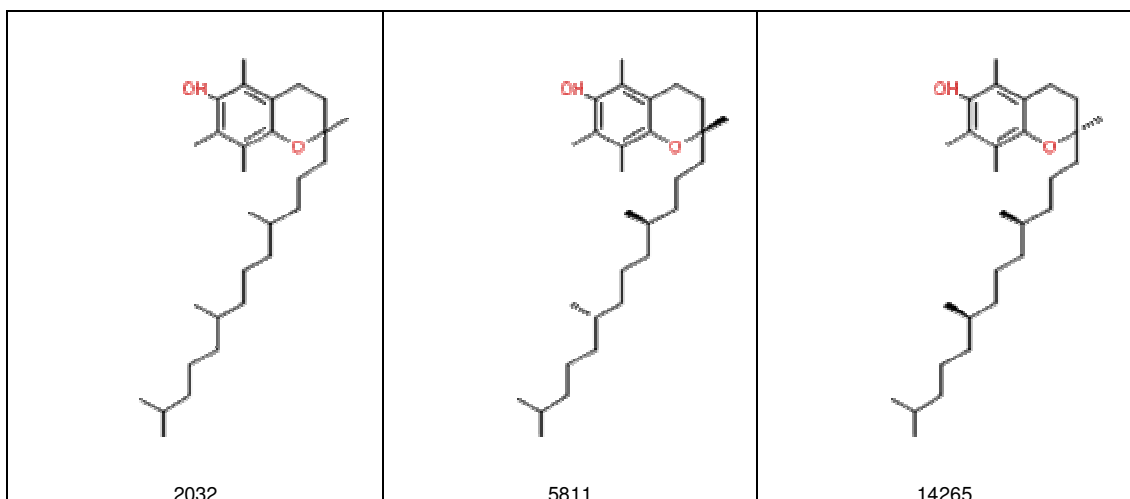

**Name: Desthiobiotin**

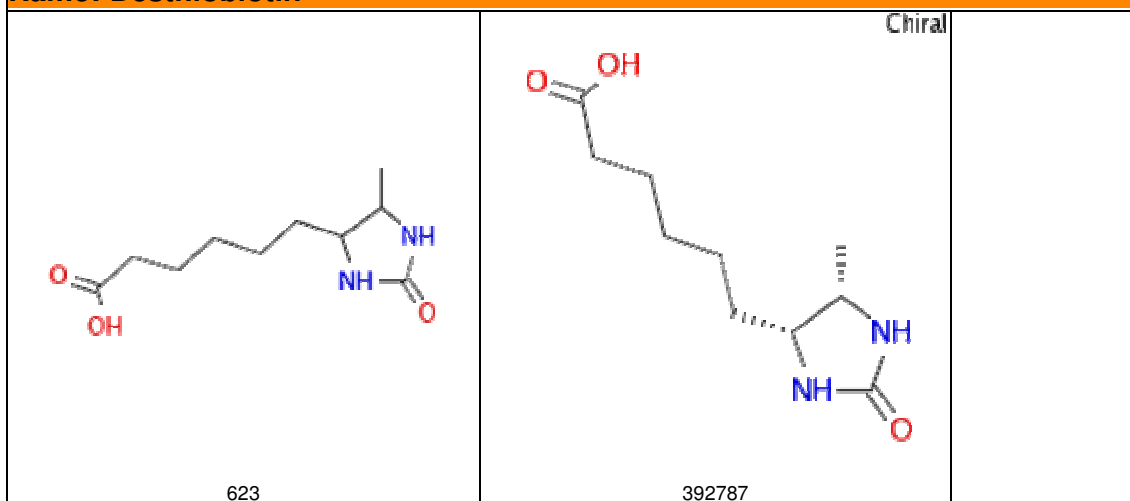

**Name: Thymidine 5'-monophosphate**

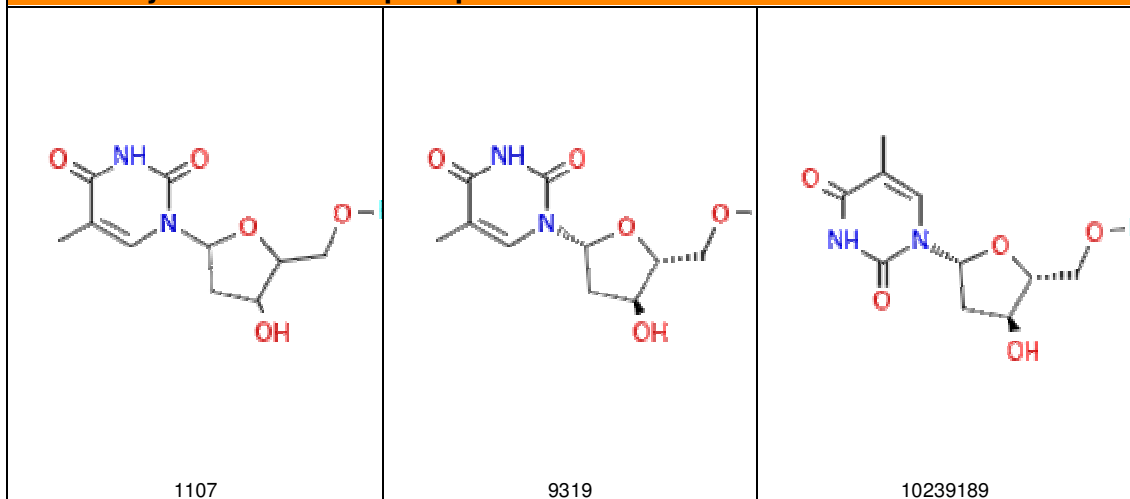

**Name: mevalonic acid**

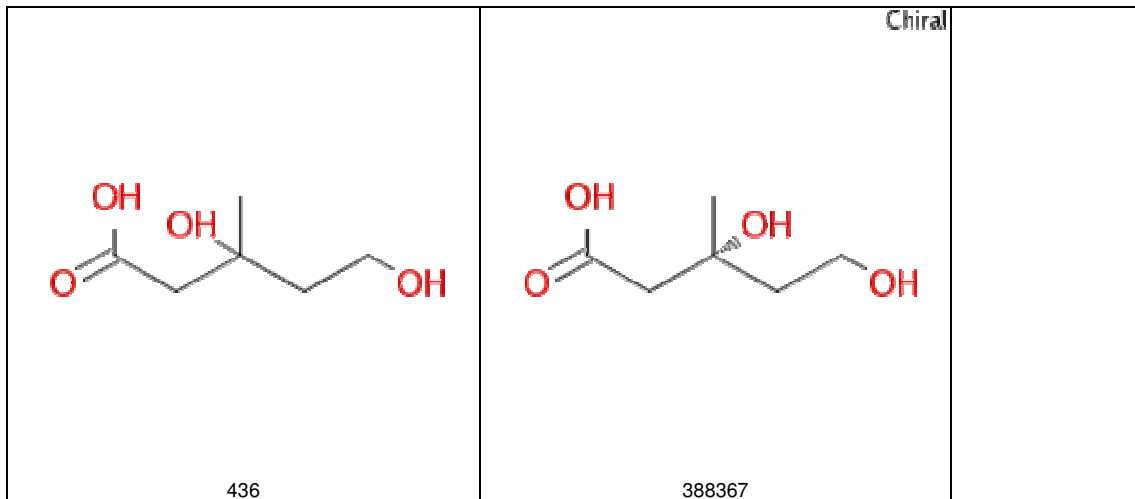

**Name: Thiamin**

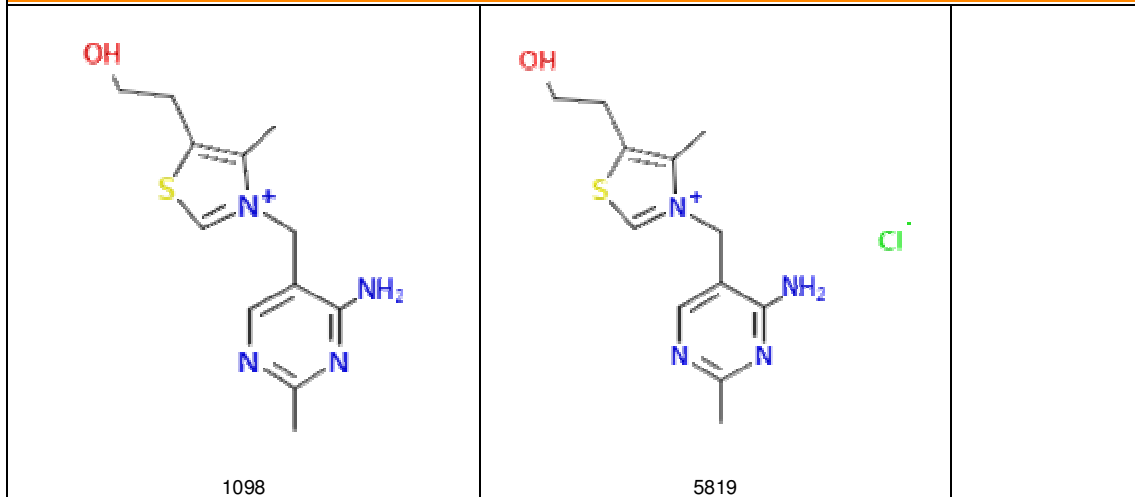

**Name: brassicasterol**

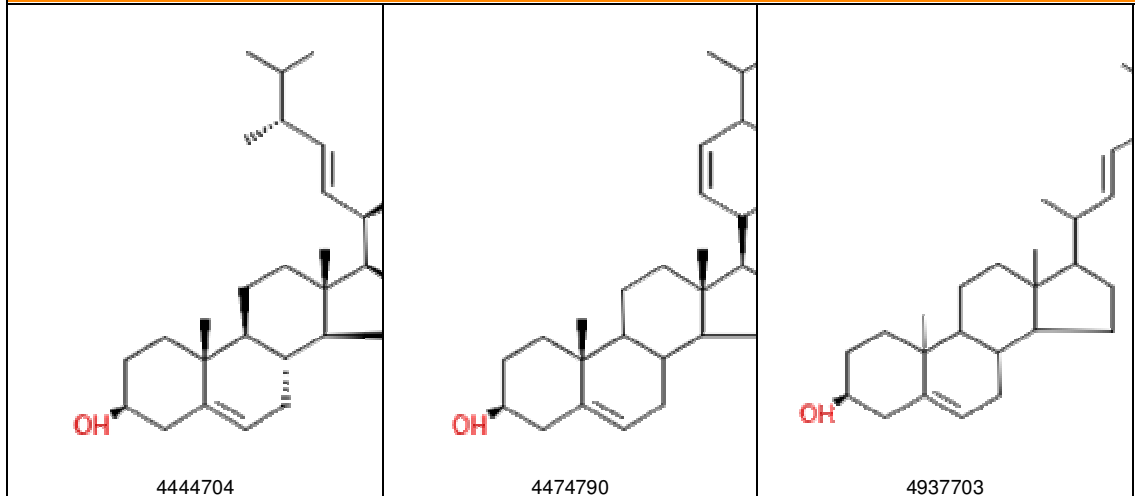

**Name: diphosphopyridine nucleotide**

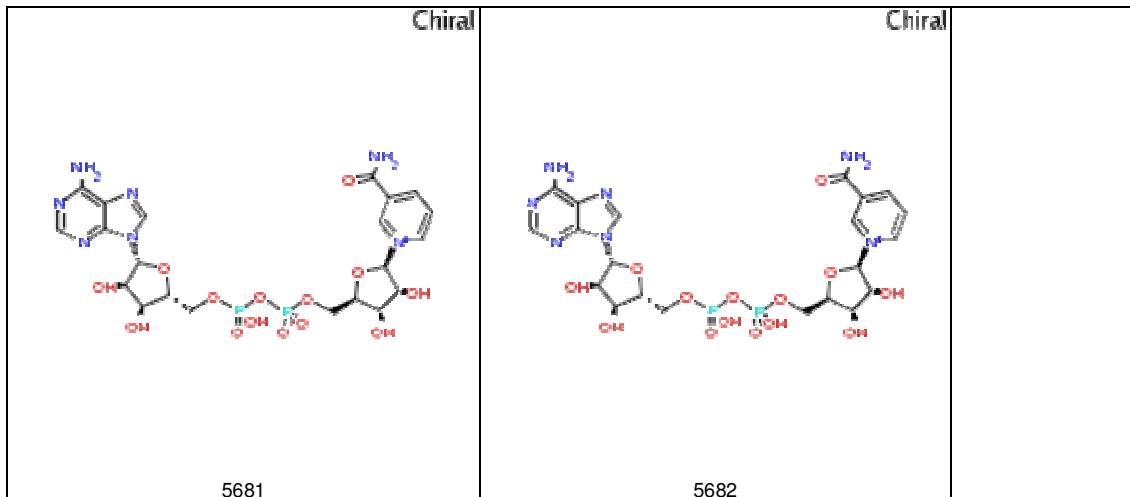

**Name: beta-carotene**

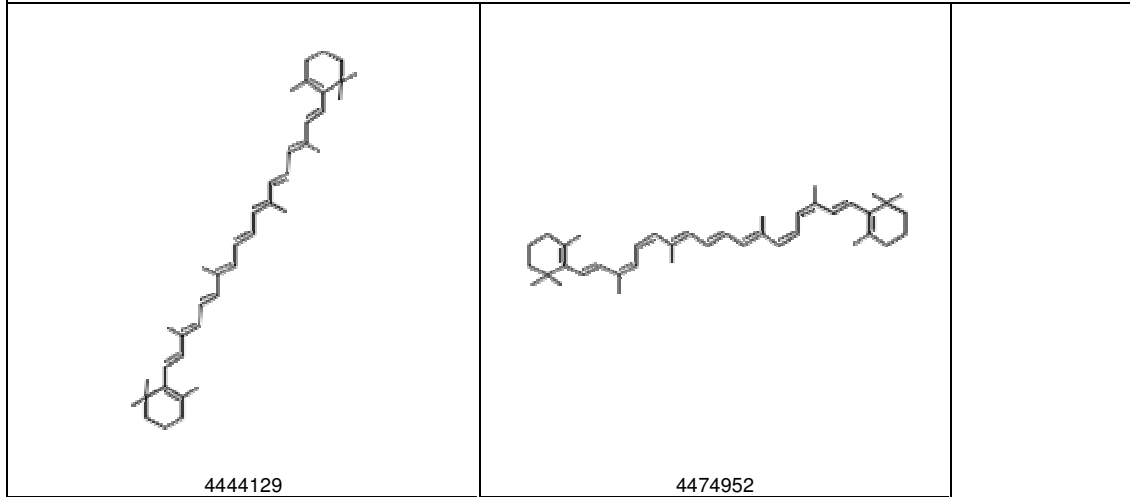

**Name: dADP**

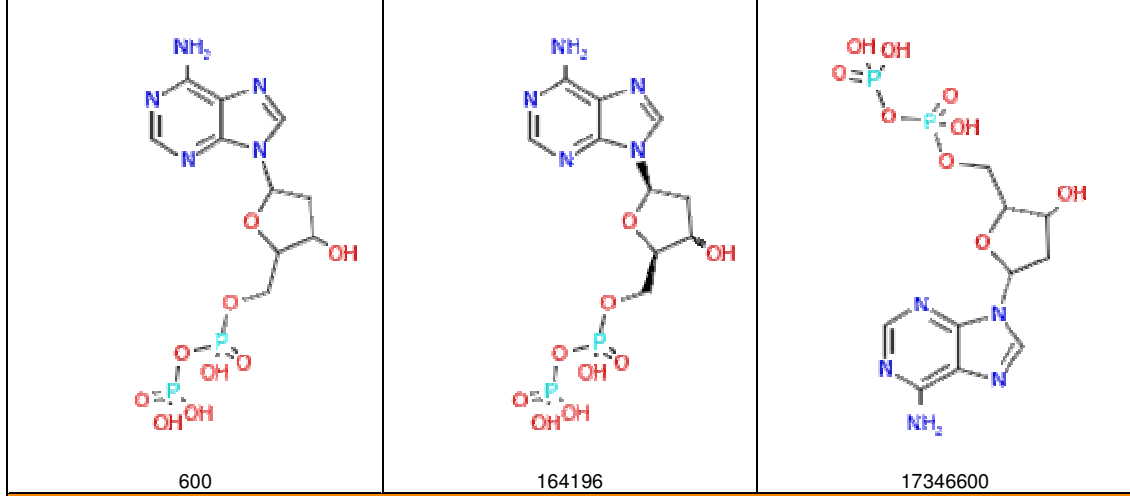

**Name: Urocanic acid**

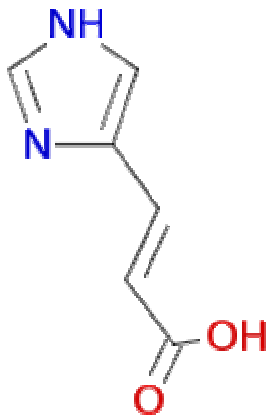

1145

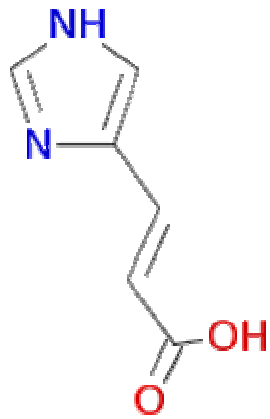

643824

**Name: vitamin H**

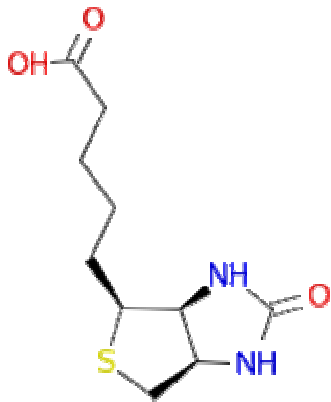

149962

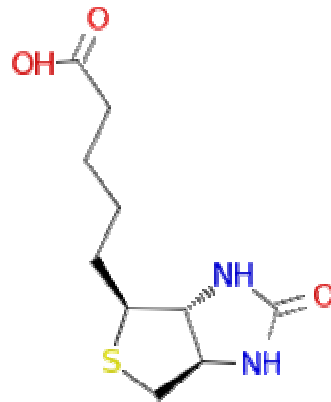

5408838

**Name: deoxycytidine diphosphate**

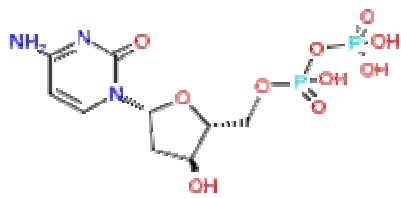

132961

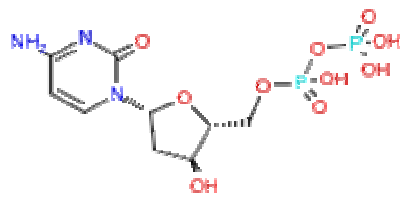

4573702

**Name: Lactose**



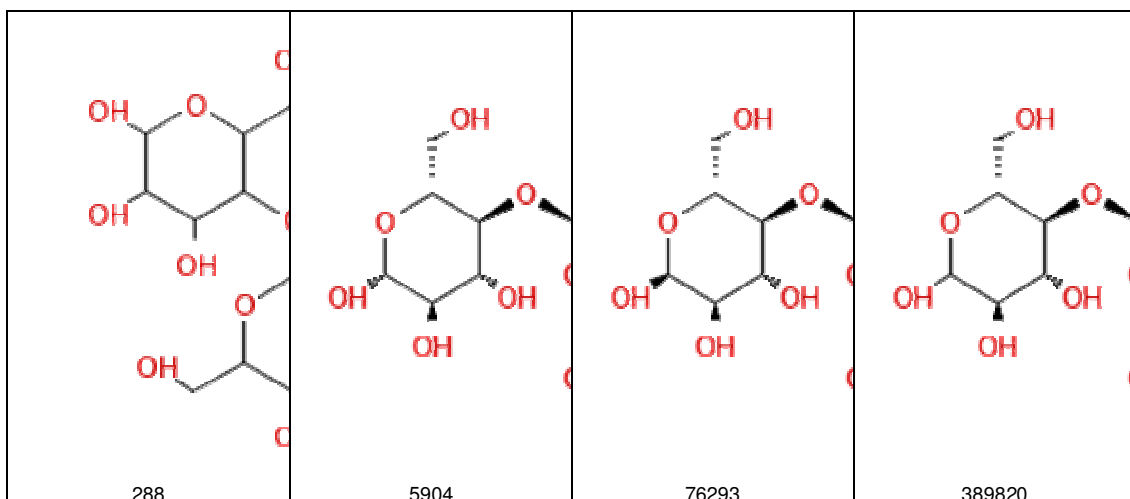

**Name: L-pipecolic acid**

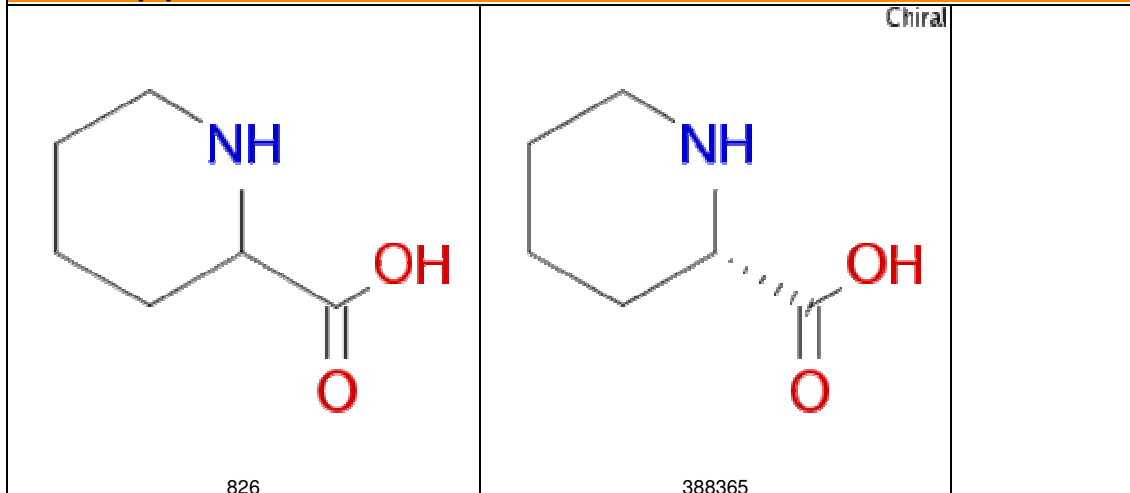

**Name: Glucosylceramide**

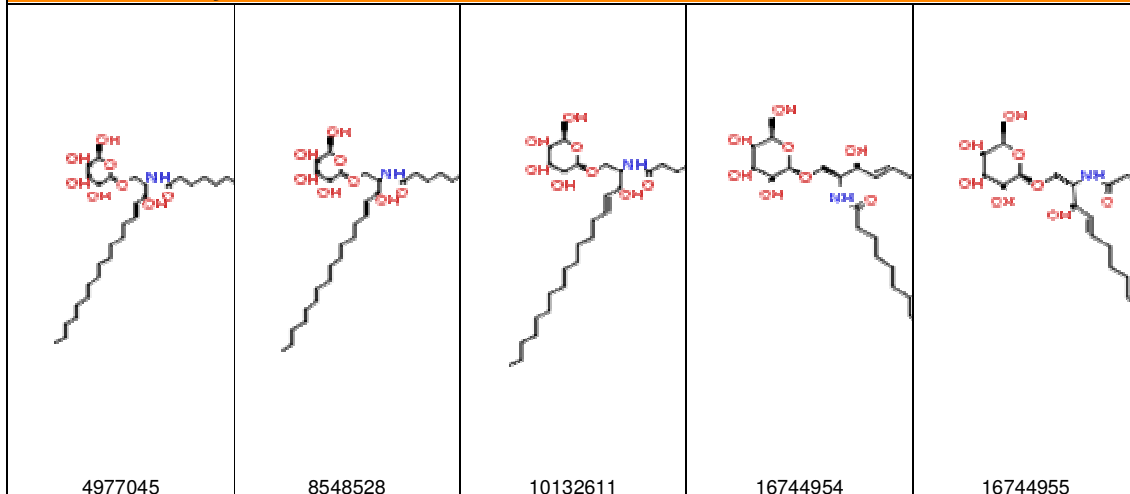

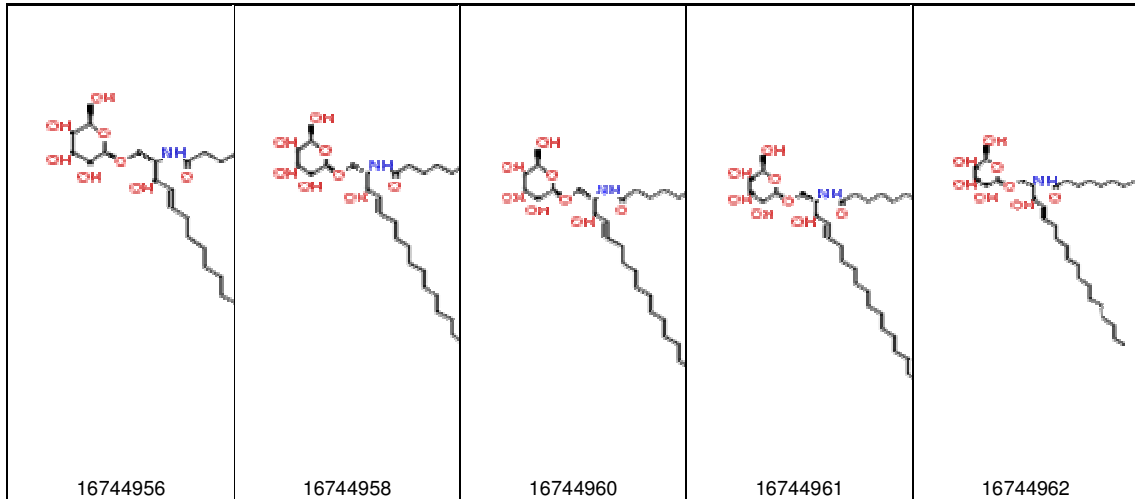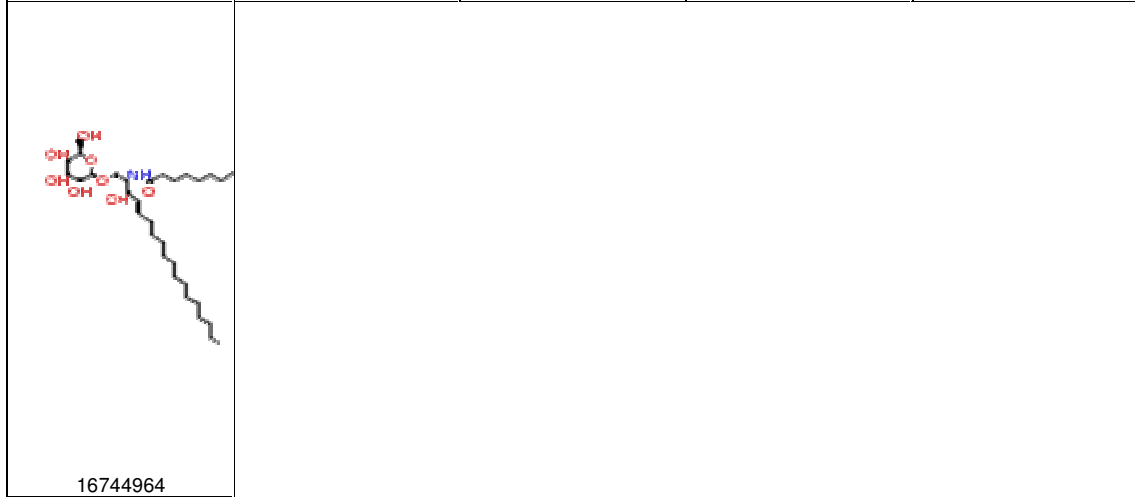

**Name: L-myo-inositol 1-phosphate**

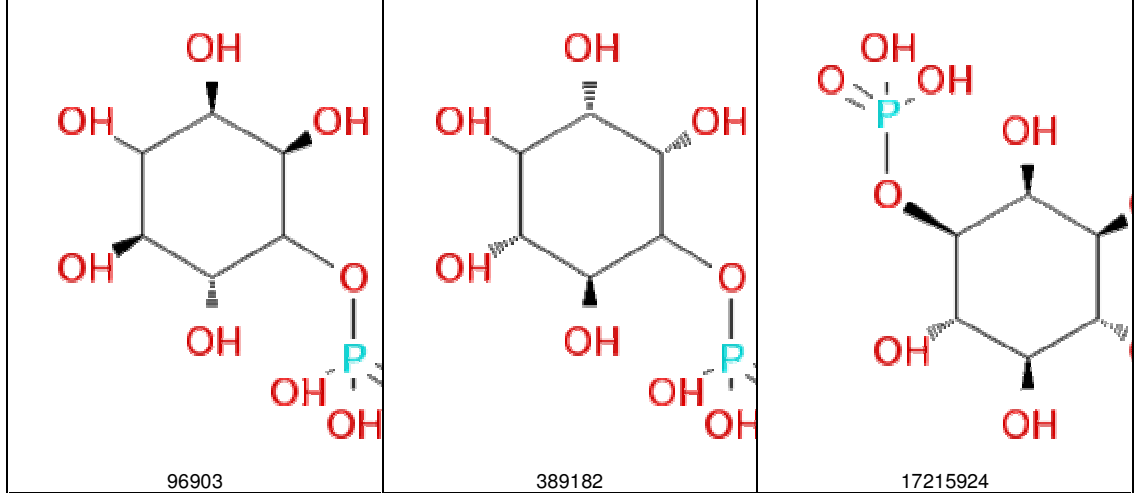

**Name: Sitosterol**

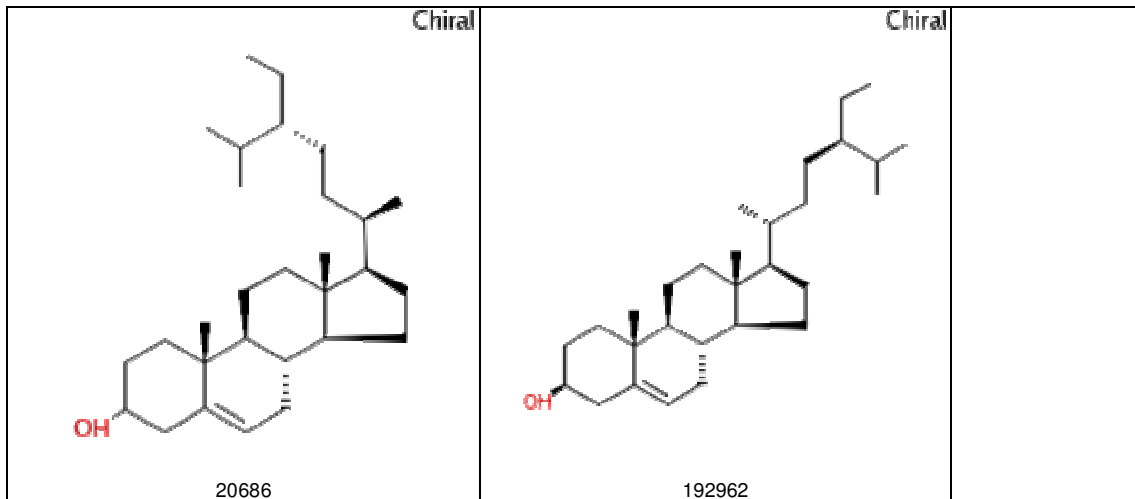

**Name: alpha-methylbutyryl-CoA**

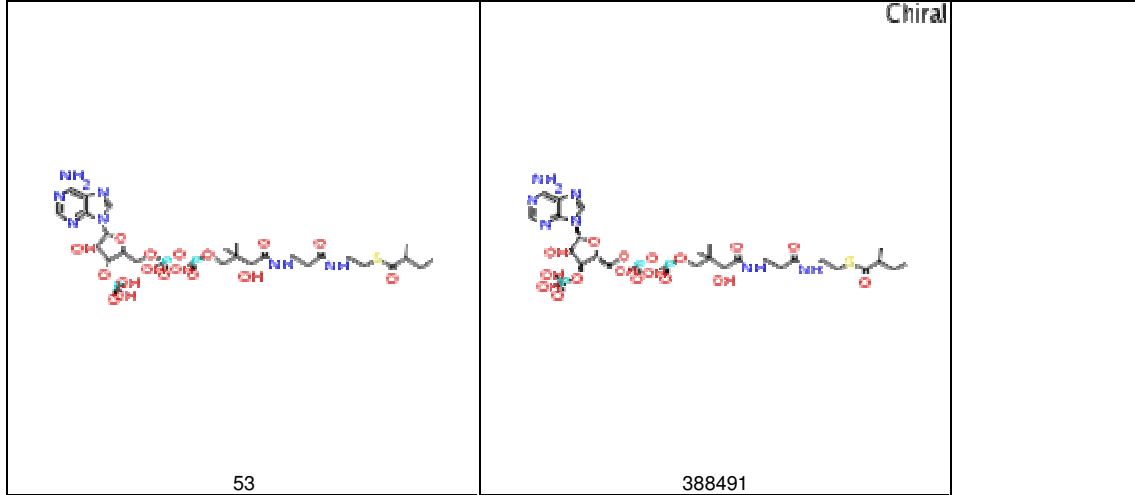

**Name: cytidine diphosphate**

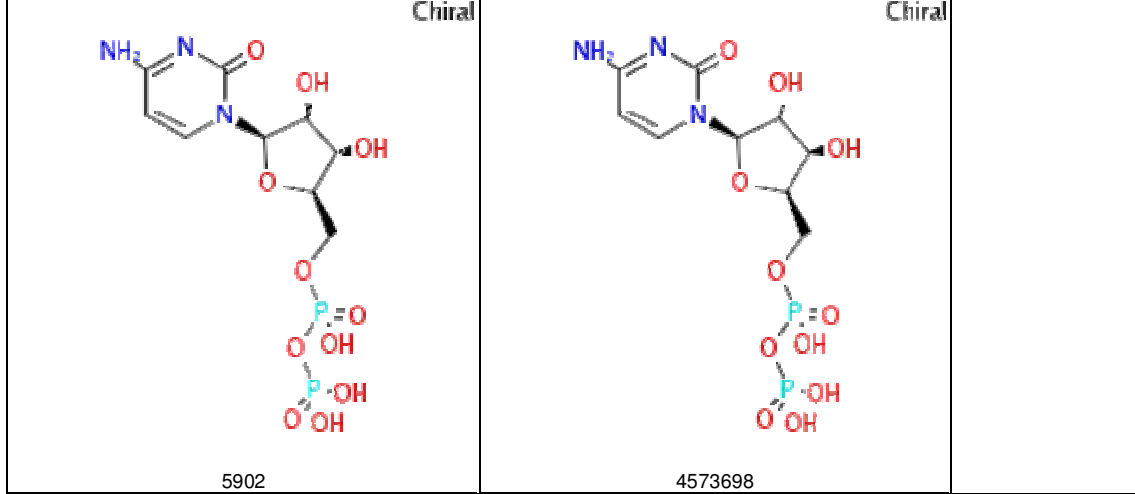

**Name: 5-phosphomevalonate**

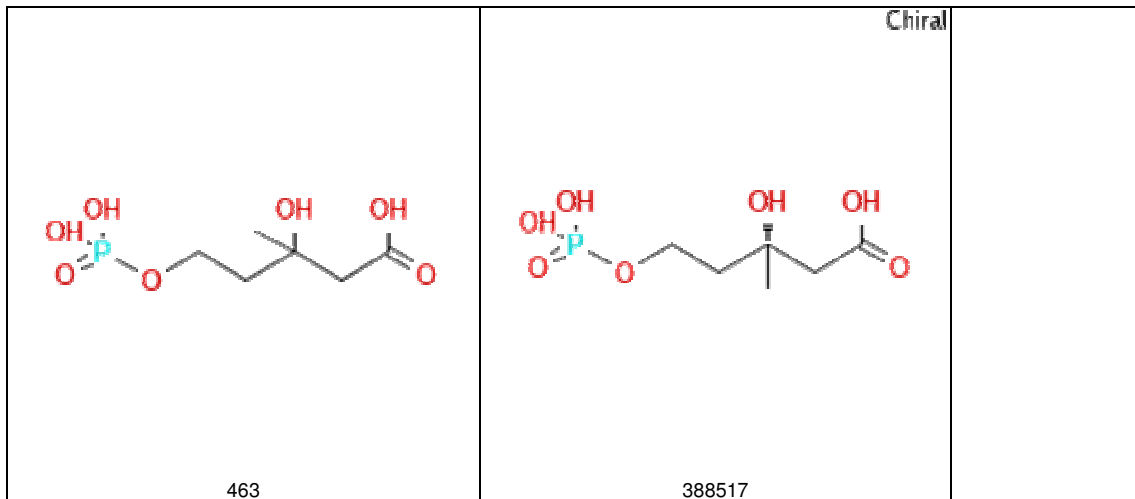

**Name: Mannitol**

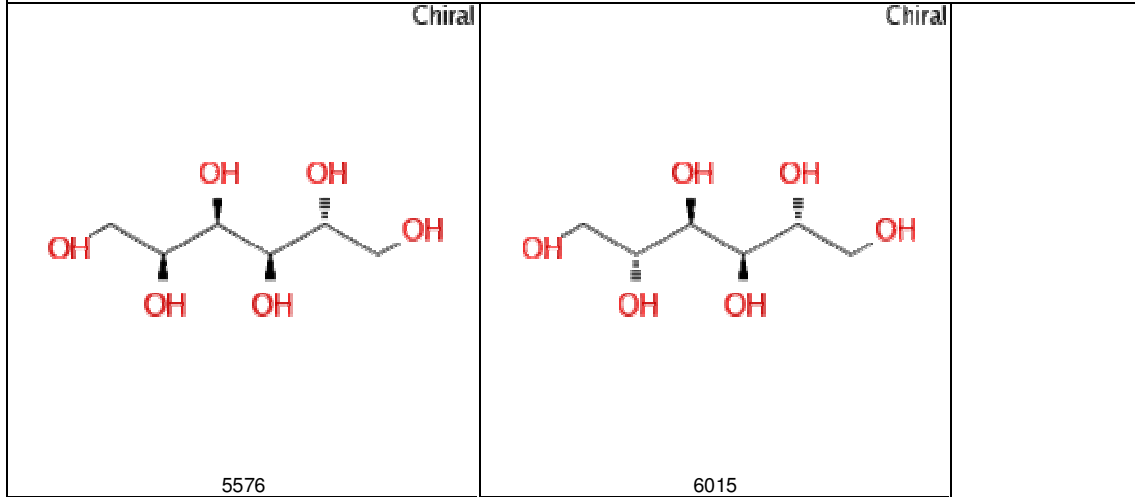

**Name: octanoyl-CoA**

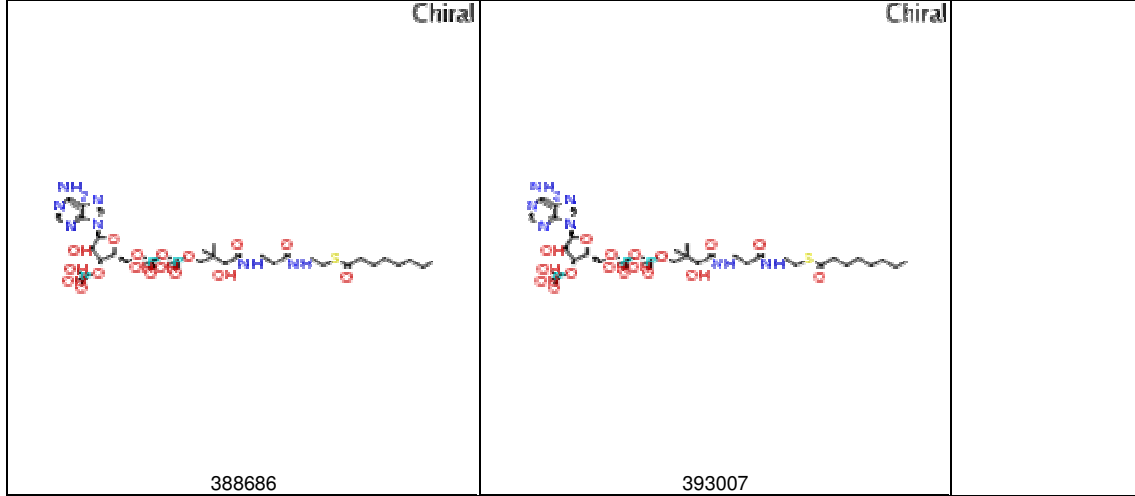

**Name: N-formylkynurenine**

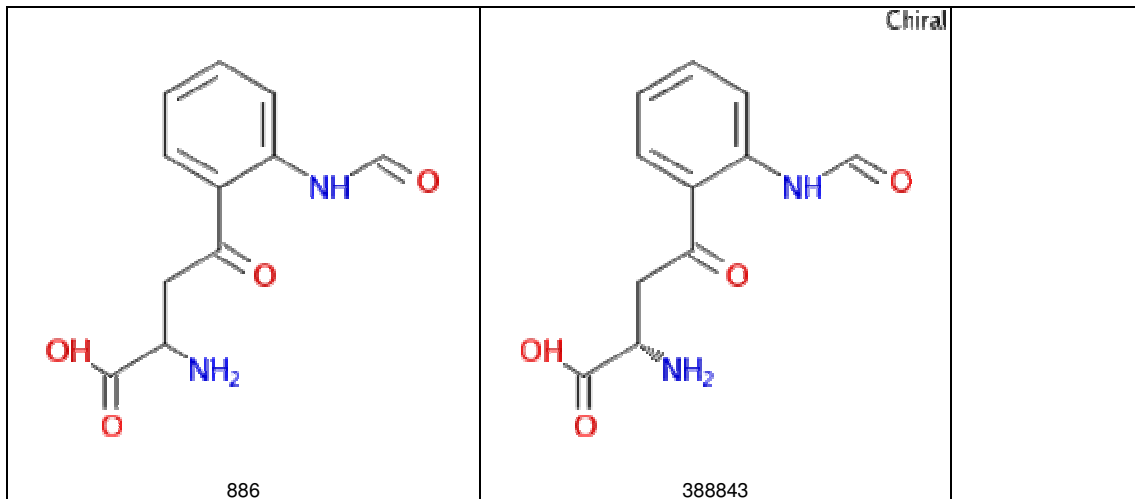

**Name: Sphingosine-1-phosphate**

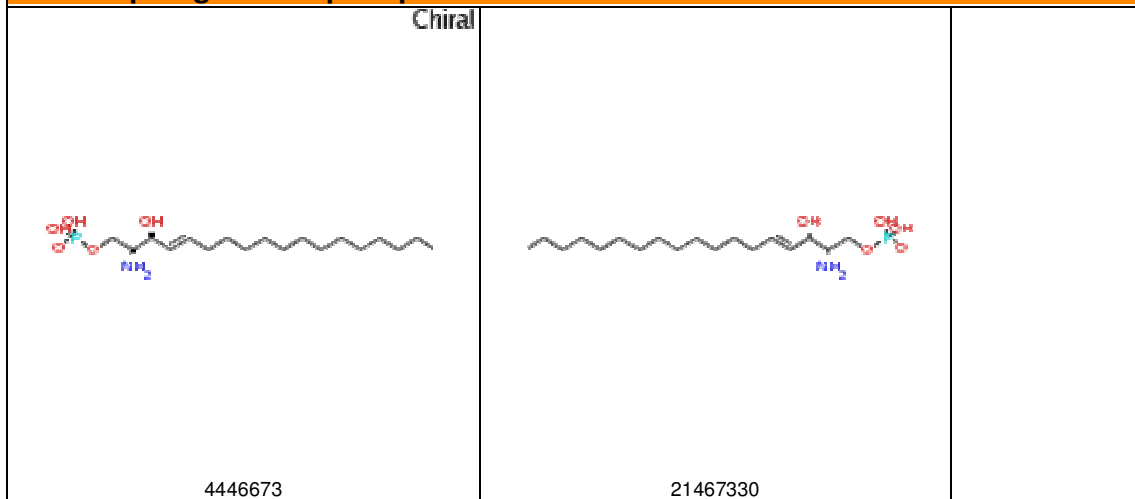

**Name: dGTP**

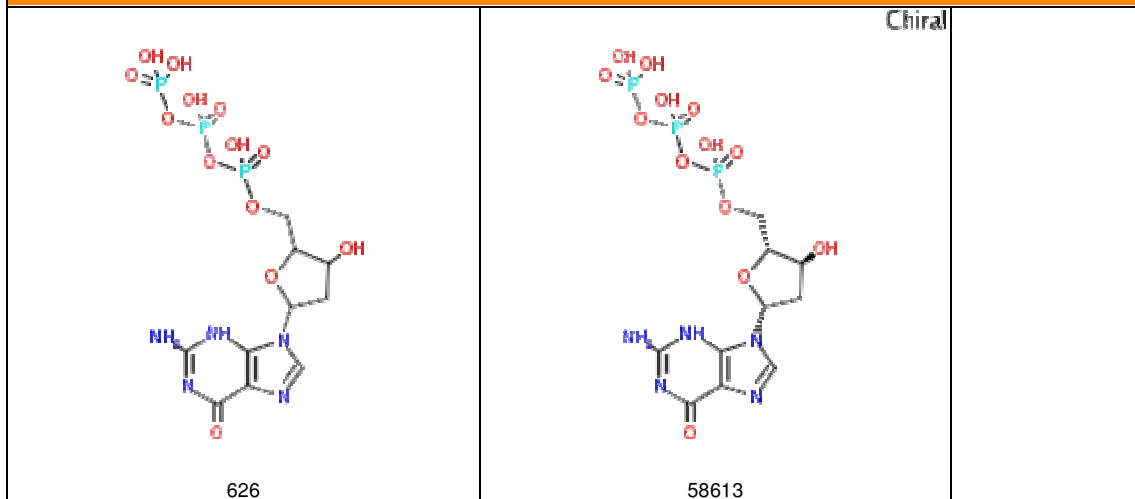

**Name: myristoyl-CoA**

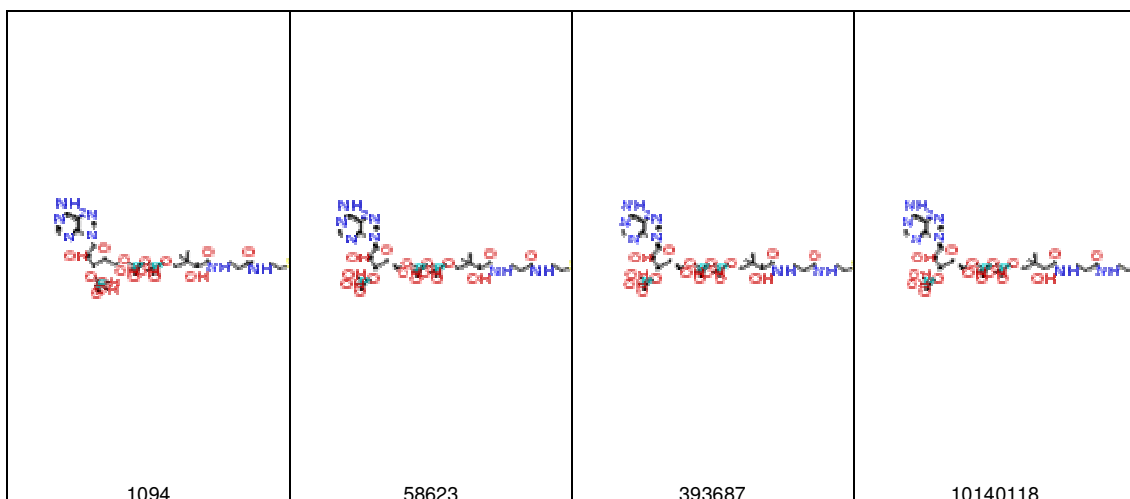

**Name: palmitoyl CoA**

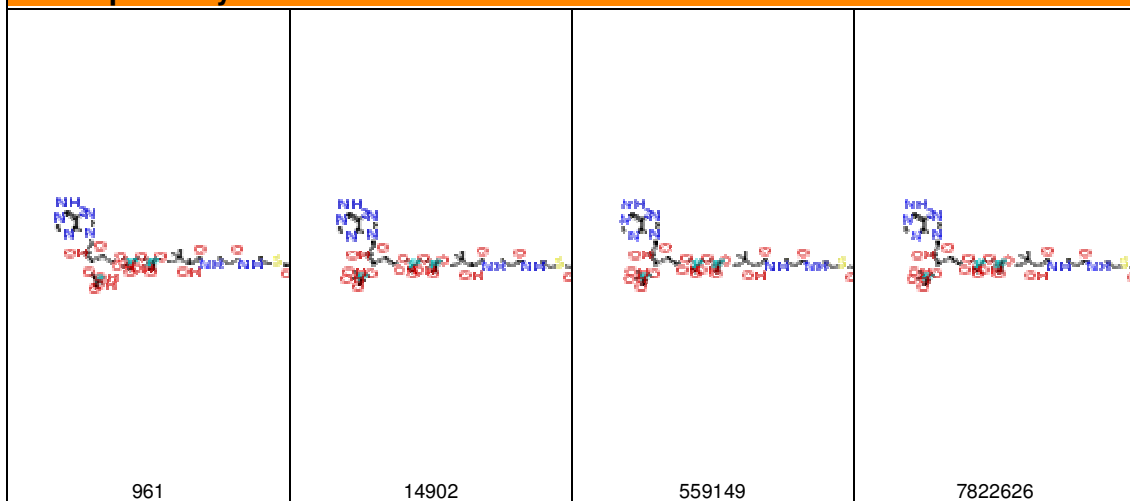

**Name: decanoyl-CoA**

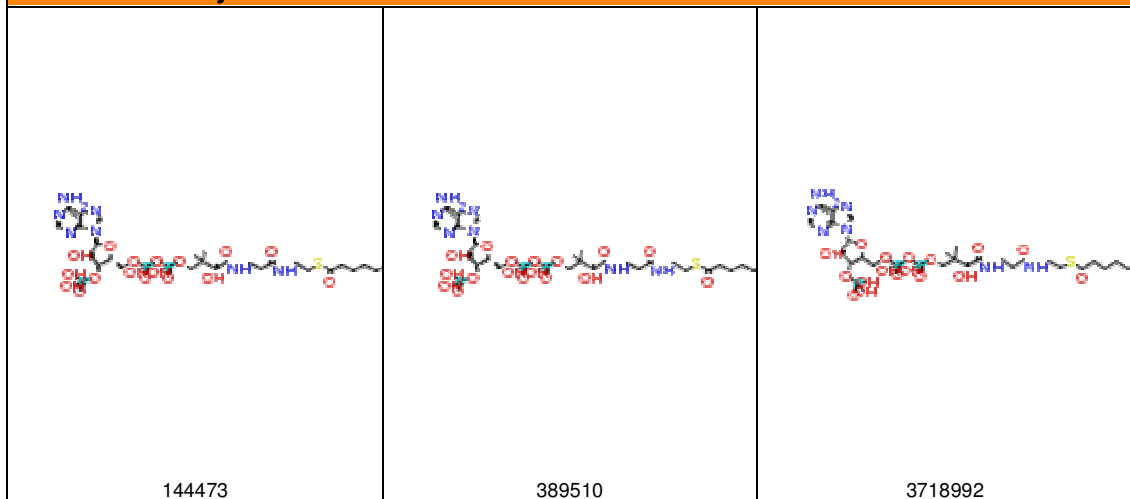

**Name: Diphosphoinositol pentakisphosphate**

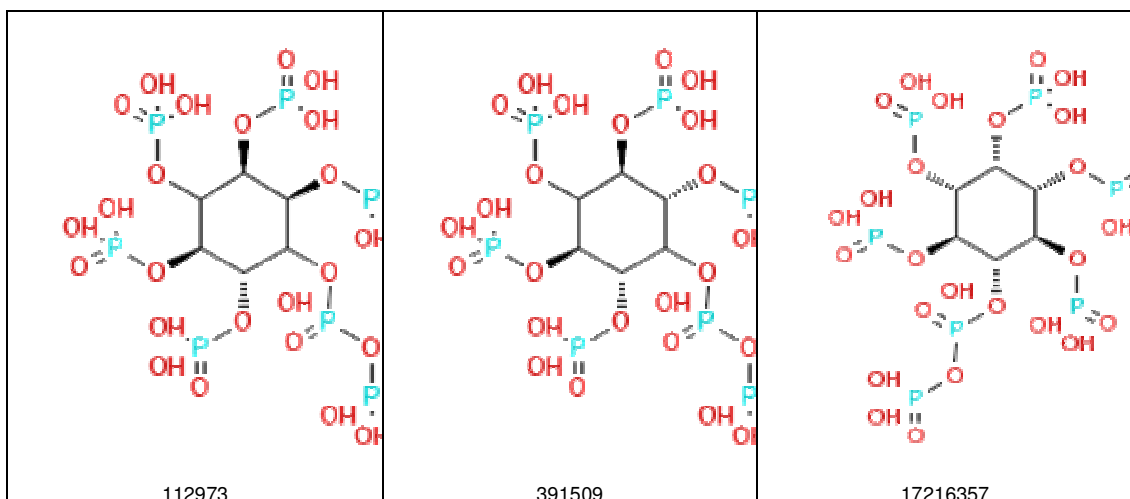

Name: 5-methyluridine

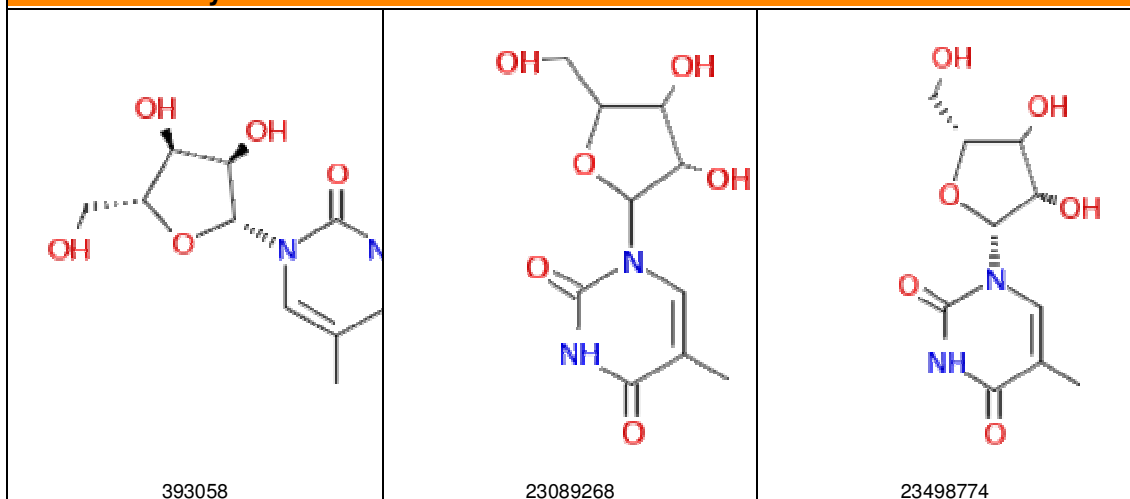

Name: glutamic gamma-semialdehyde

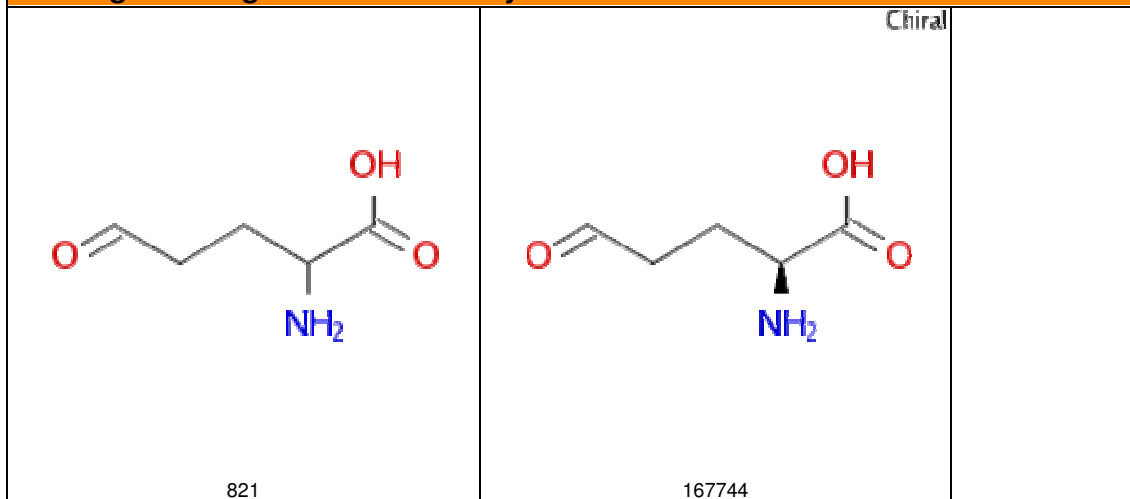

Name: isocitric acid

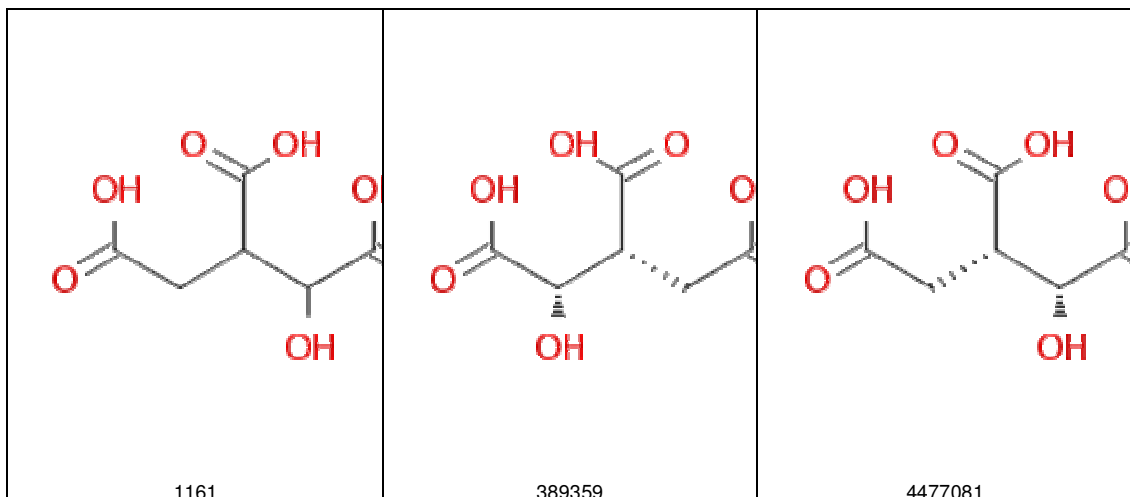

**Name: trehalose 6-phosphate**

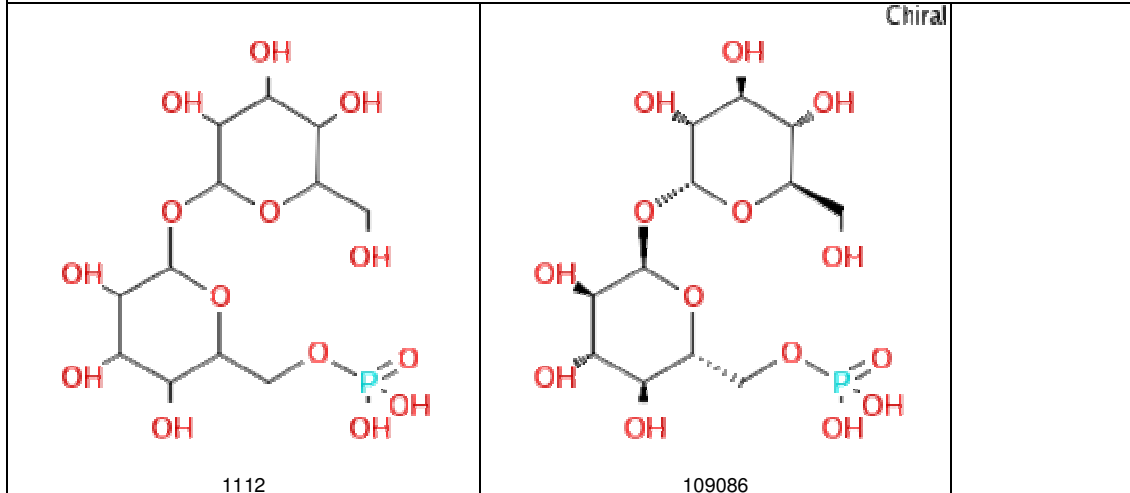

**Name: riboflavine**

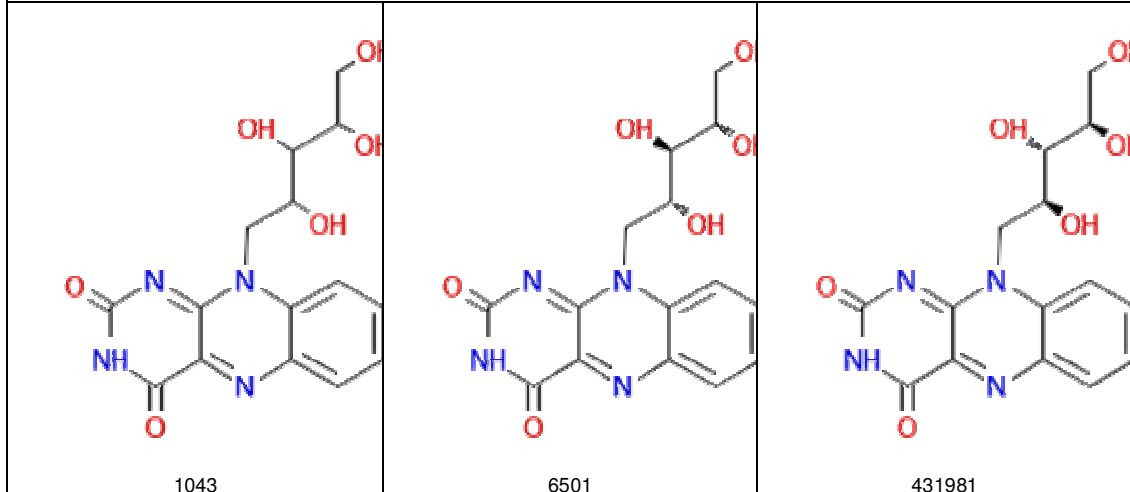

**Name: dihydrosphingosine-1-phosphate**



|                                                                                                                                                                                                                        |                                                                                                                                                                                                                                       |
|------------------------------------------------------------------------------------------------------------------------------------------------------------------------------------------------------------------------|---------------------------------------------------------------------------------------------------------------------------------------------------------------------------------------------------------------------------------------|
|  <p>Chemical structure of L-lysine, showing a long aliphatic chain, an amino group (NH<sub>2</sub>), and a carboxyl group (COOH).</p> | <p>Chiral</p>  <p>Chemical structure of L-lysine, showing a long aliphatic chain, an amino group (NH<sub>2</sub>), and a carboxyl group (COOH).</p> |
| 505                                                                                                                                                                                                                    | 559277                                                                                                                                                                                                                                |

**Name: Sulphur**

|                       |                       |
|-----------------------|-----------------------|
| <p>SH<sub>2</sub></p> | <p>SH<sub>2</sub></p> |
| 391                   | 4515054               |

**Name: glucose-1-phosphate**

|                                                                                                                                                                                                                                        |                                                                                                                                                                                                                                         |
|----------------------------------------------------------------------------------------------------------------------------------------------------------------------------------------------------------------------------------------|-----------------------------------------------------------------------------------------------------------------------------------------------------------------------------------------------------------------------------------------|
| <p>Chiral</p> 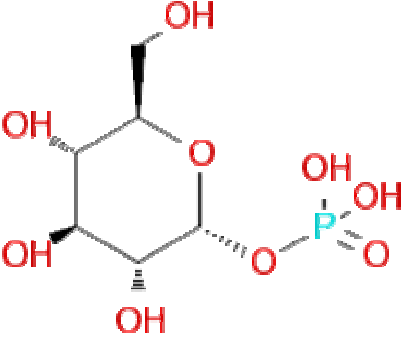 <p>Chemical structure of alpha-D-glucose-1-phosphate, showing a glucose ring with a phosphate group attached to the C1 position.</p> | <p>Chiral</p>  <p>Chemical structure of alpha-D-glucose-1-phosphate, showing a glucose ring with a phosphate group attached to the C1 position.</p> |
| 58977                                                                                                                                                                                                                                  | 388311                                                                                                                                                                                                                                  |

**Name: hydroxymethylglutaryl-CoA**

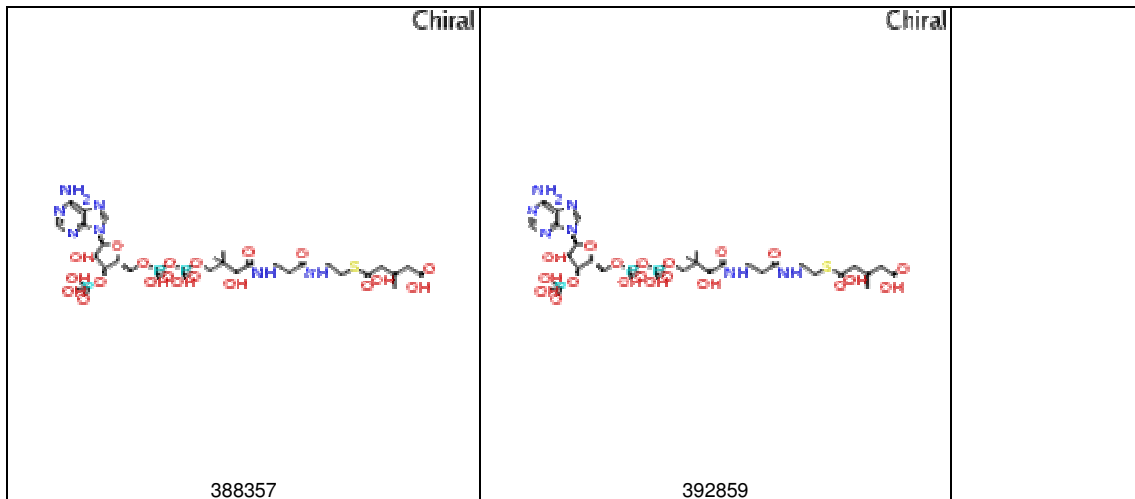

**Name: episterol**

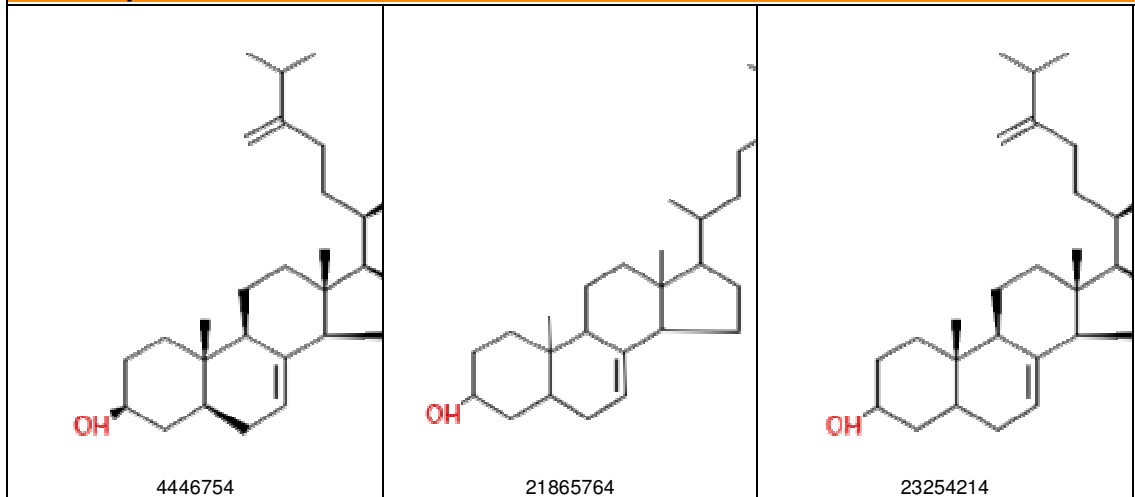

**Name: inositol 1-phosphate**

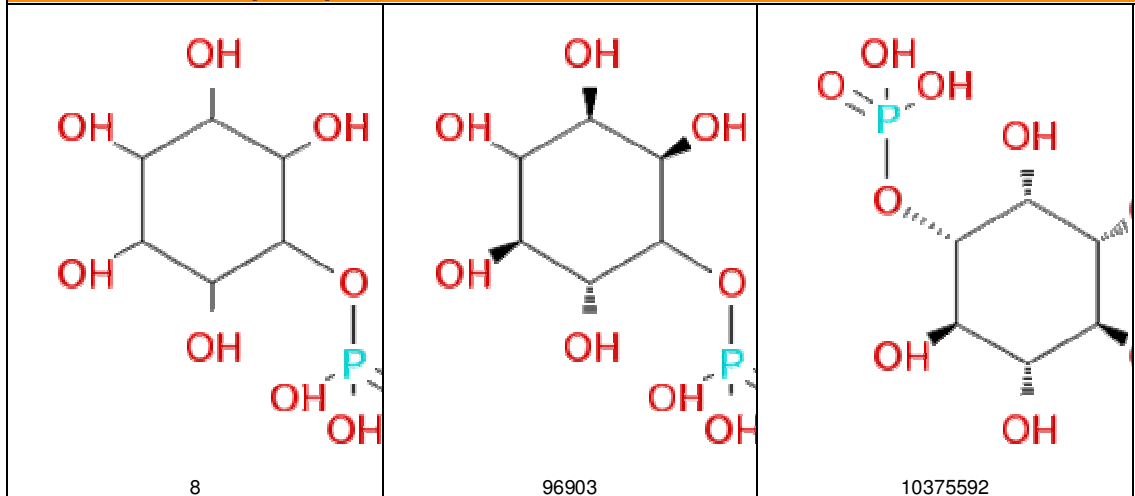

**Name: 3-hexaprenyl-4-hydroxybenzoate**

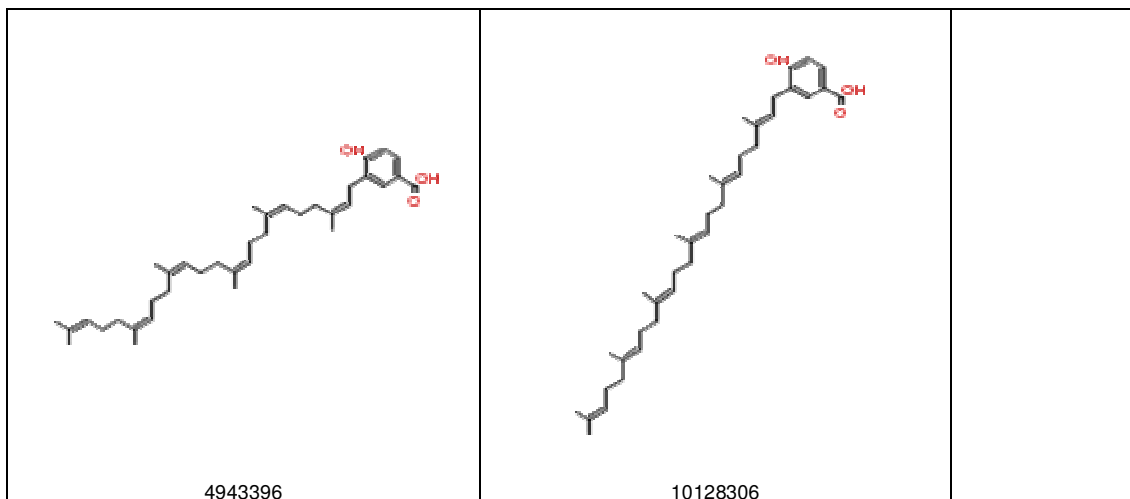

**Name: 2-aminoadipate semialdehyde**

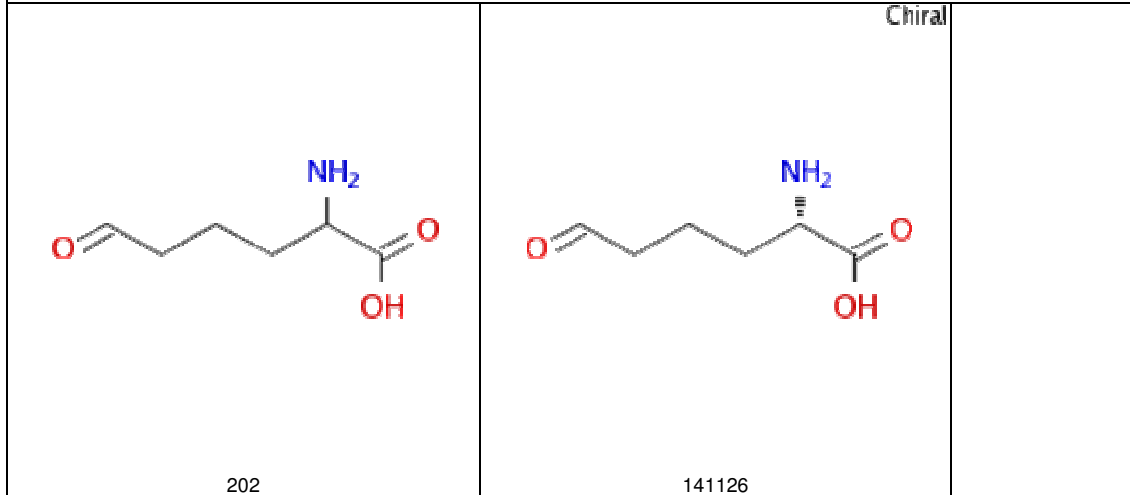

**Name: chlorogenic acid**

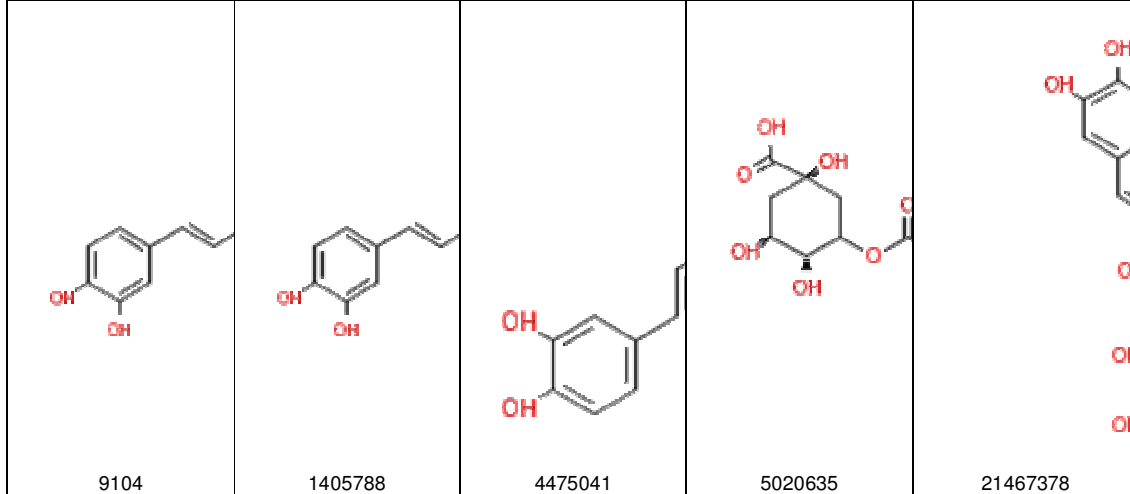

**Name: 6-phosphogluconolactone**

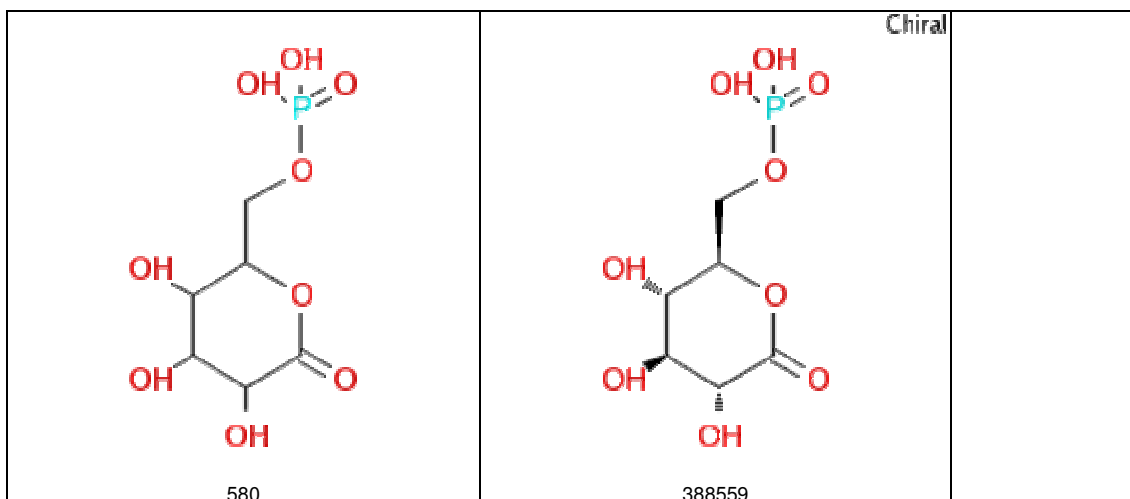

**Name: Rotenone**

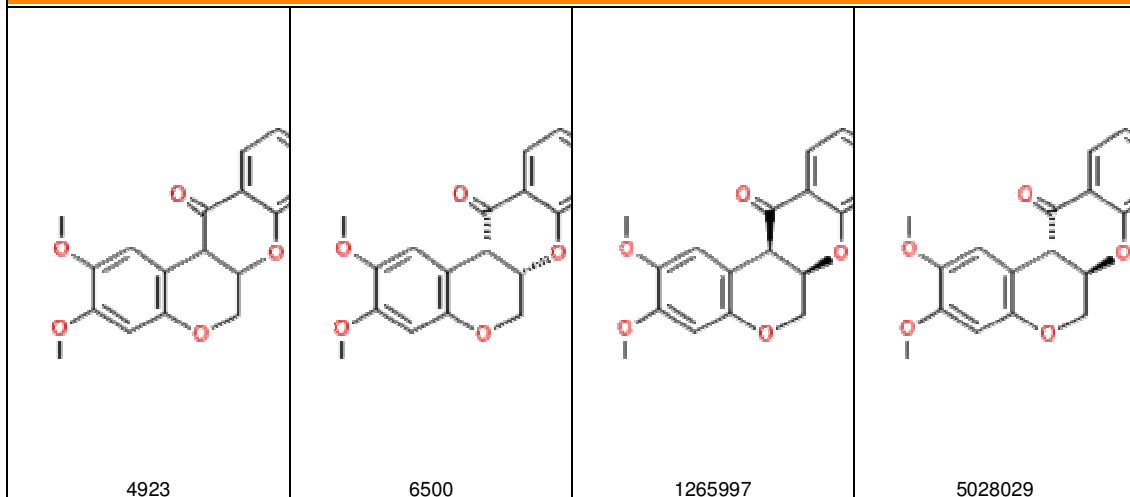

**Name: L-lactic acid**

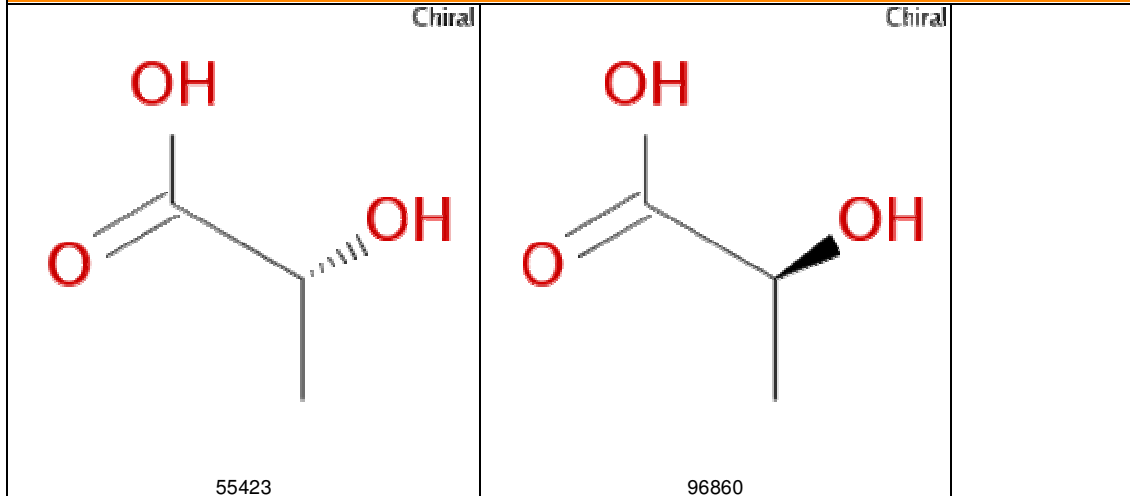

**Name: L-Lactic acid**

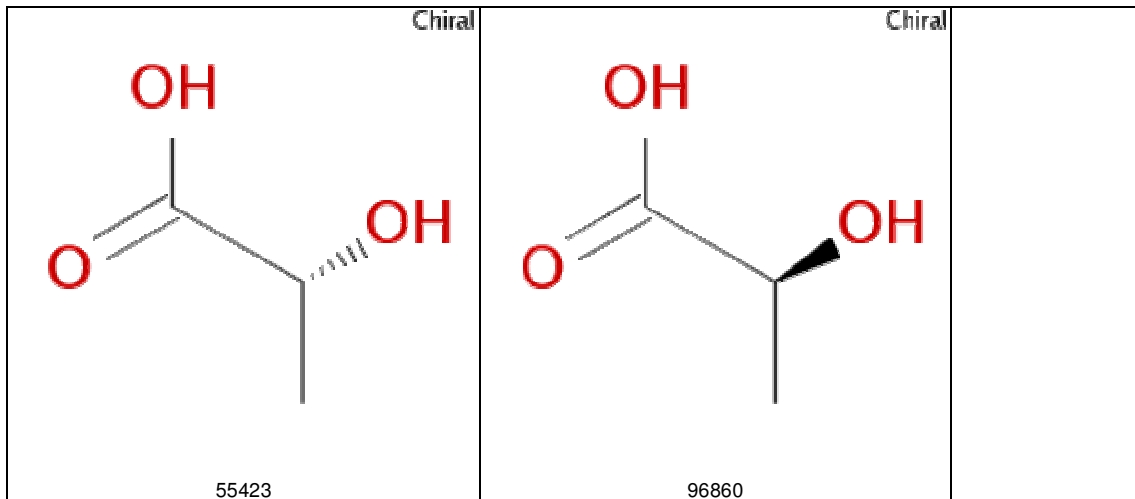

**Name: adrenaline**

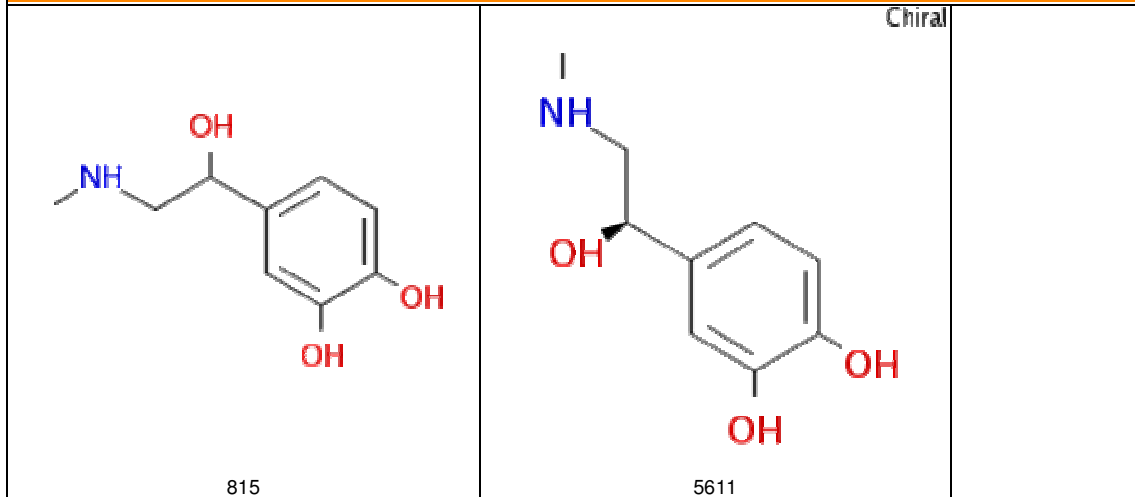

**Name: 2-methoxyestrone**

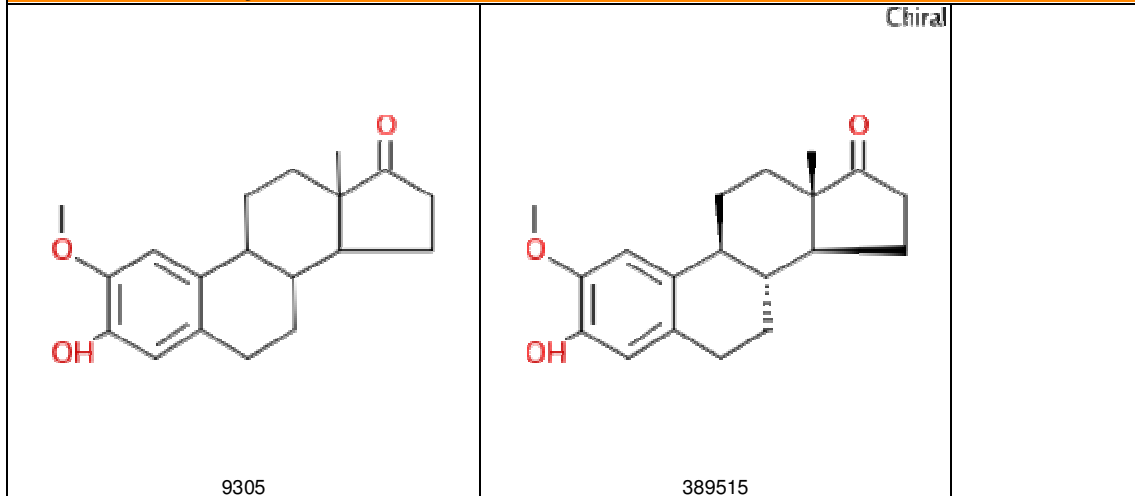

**Name: prostaglandin E1**

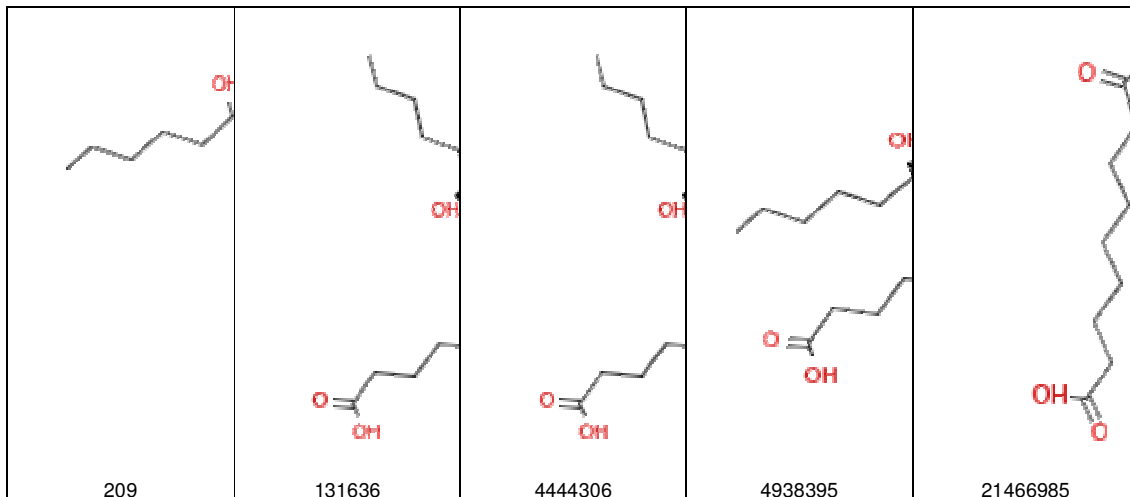

**Name: 2'-O-methyladenosine**

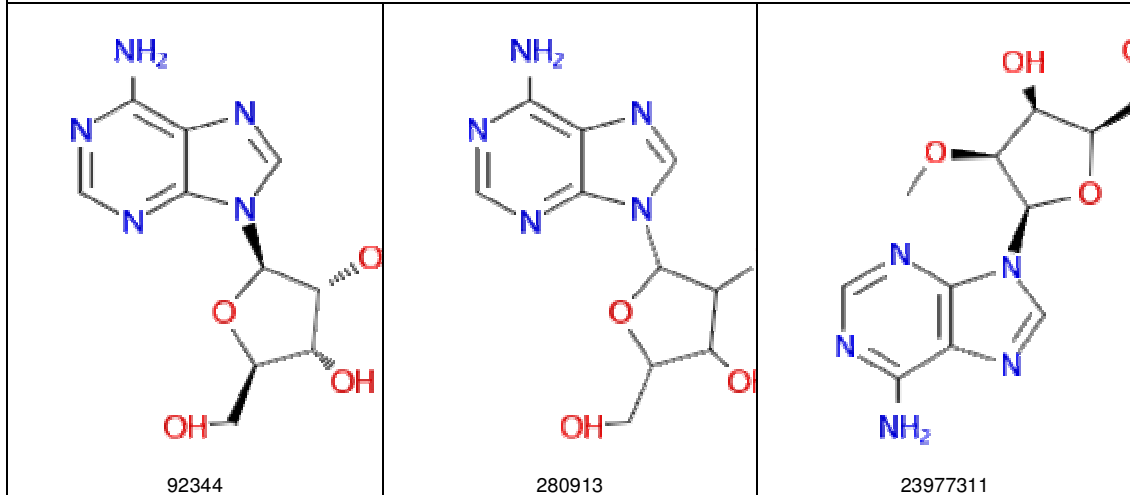

**Name: dihydrosphingosine 1-phosphate**

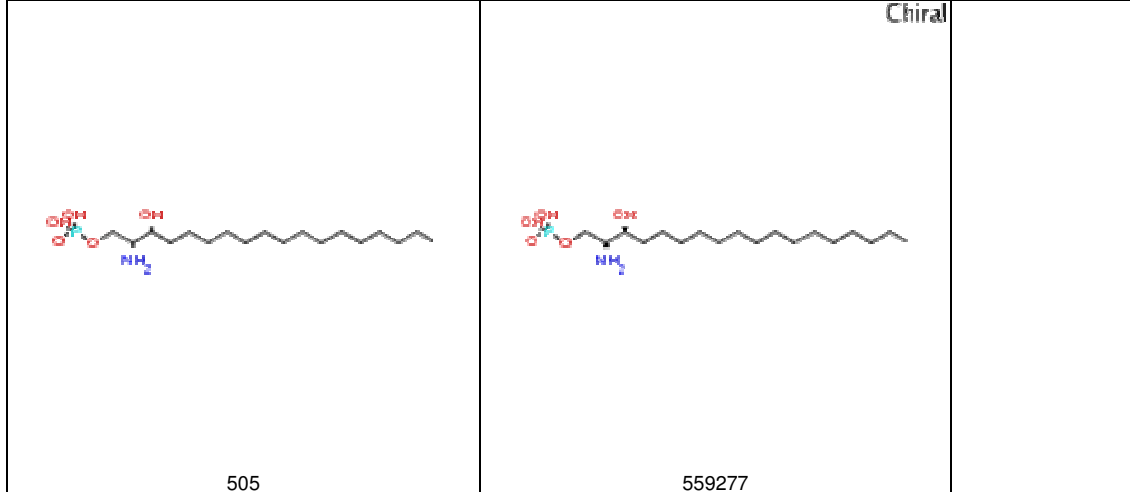

**Name: triphosphopyridine nucleotide**

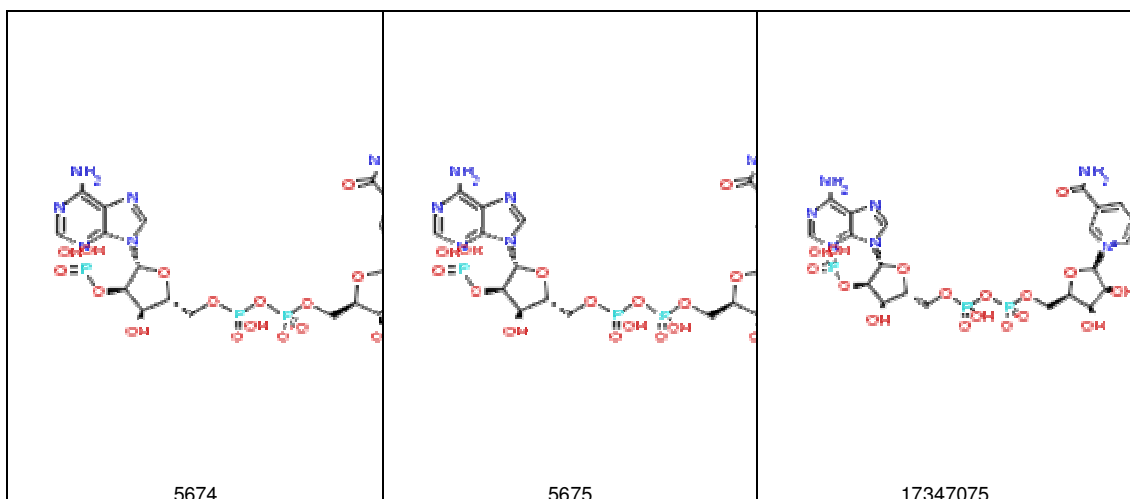

**Name: 4-hydroxy-2-nonenal**

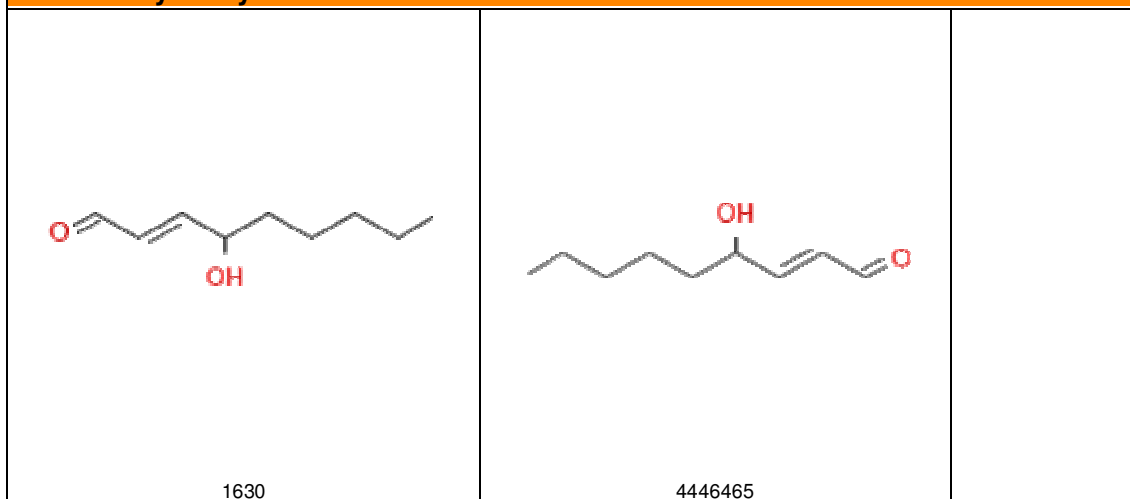

**Name: isobutyryl-CoA**

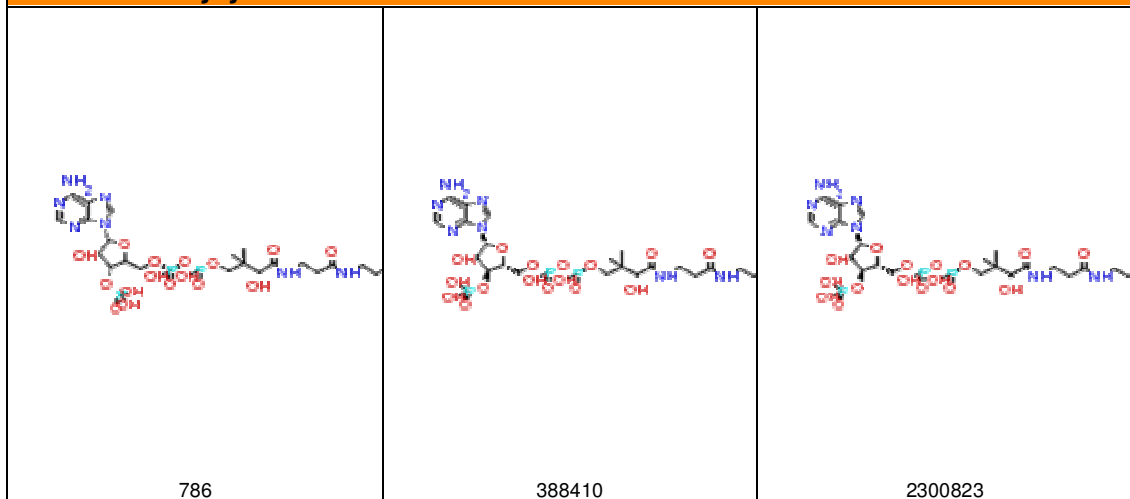

**Name: Palmitoyl coenzyme A**

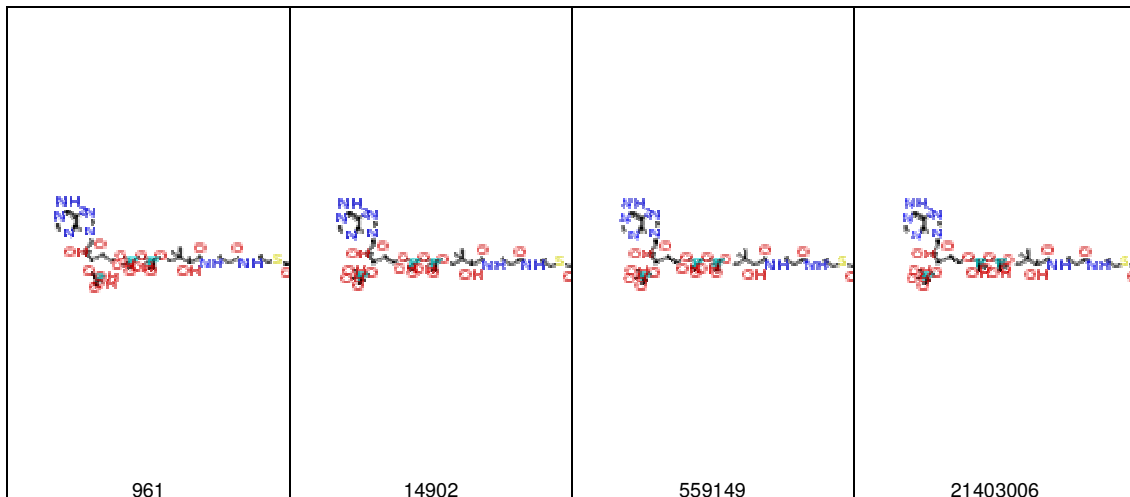

**Name: GMP**

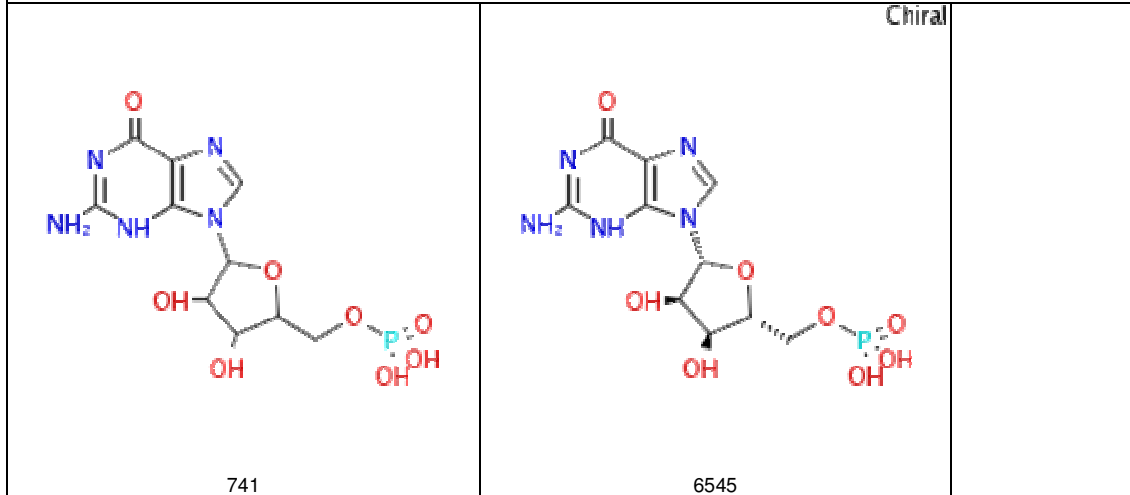

**Name: Berberine**

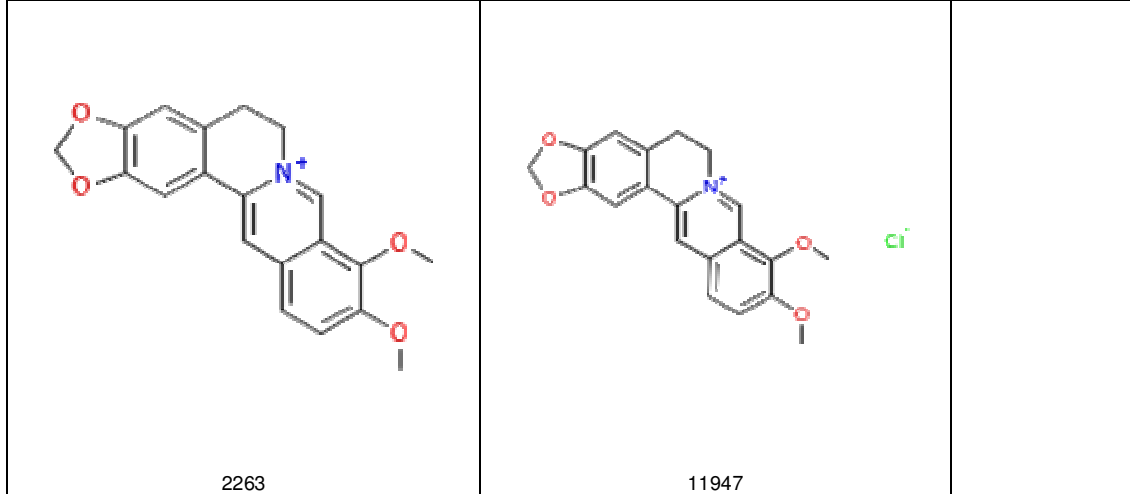

**Name: CoASH**



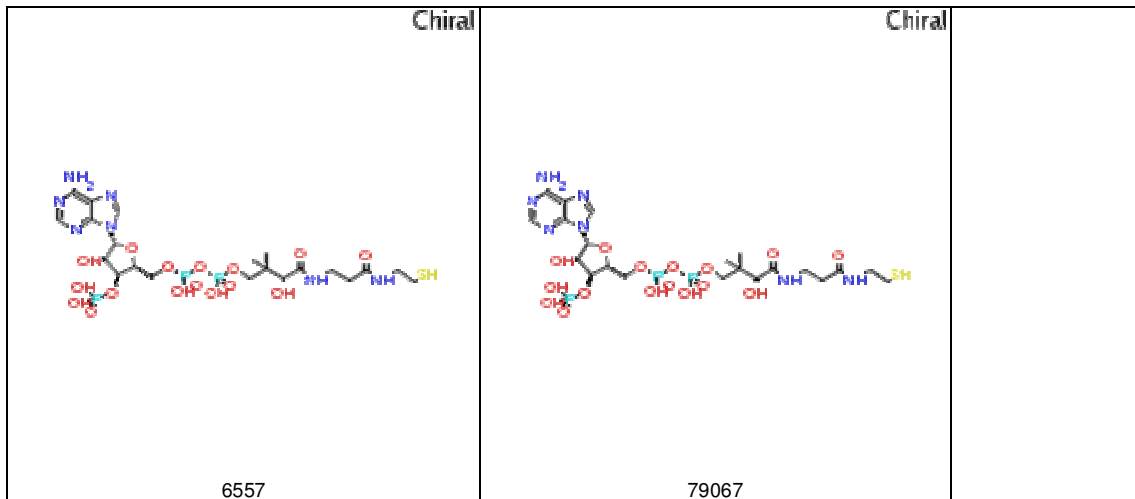

**Name: acetylmethionine**

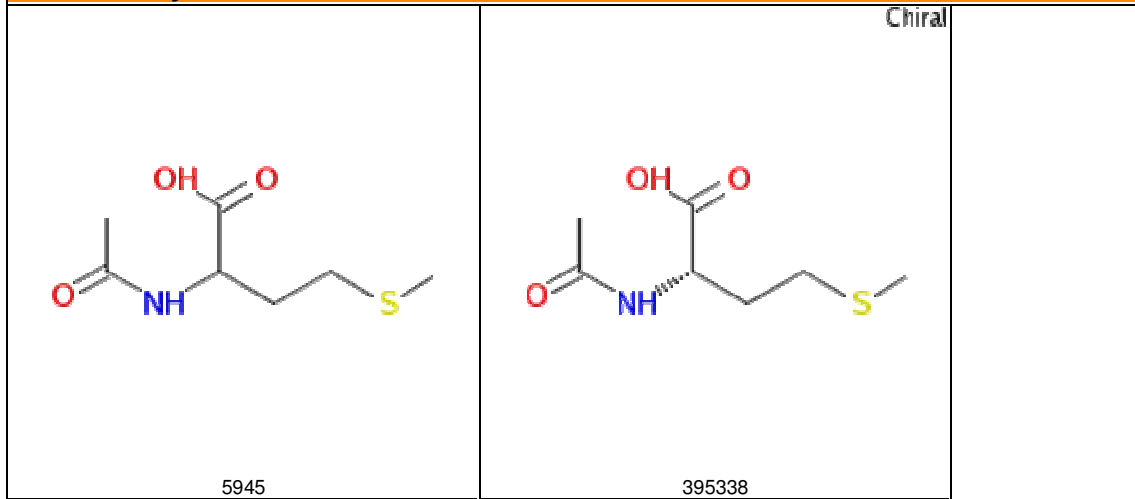

**Name: 2'-deoxyguanosine**

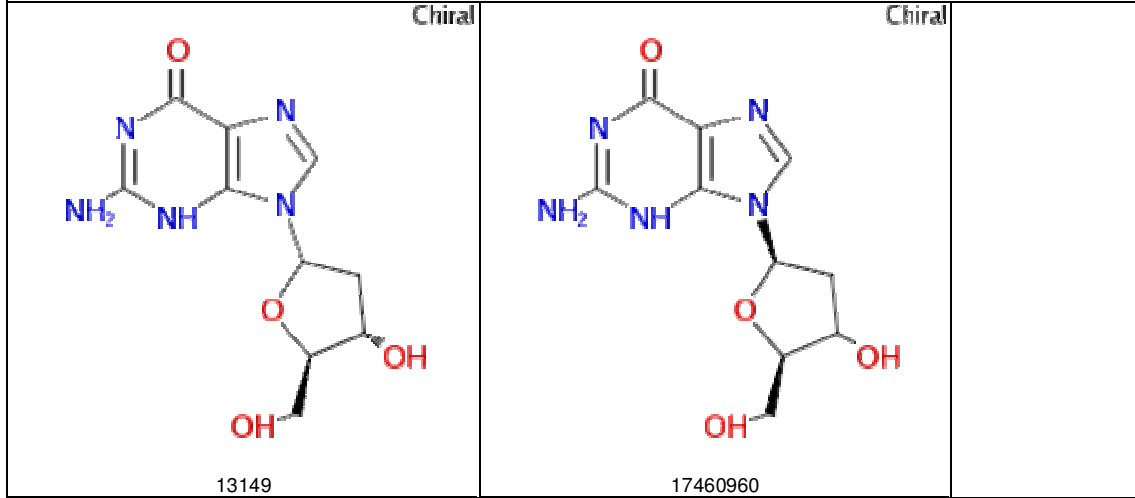

**Name: Adenosine 5'-tetraphosphate**

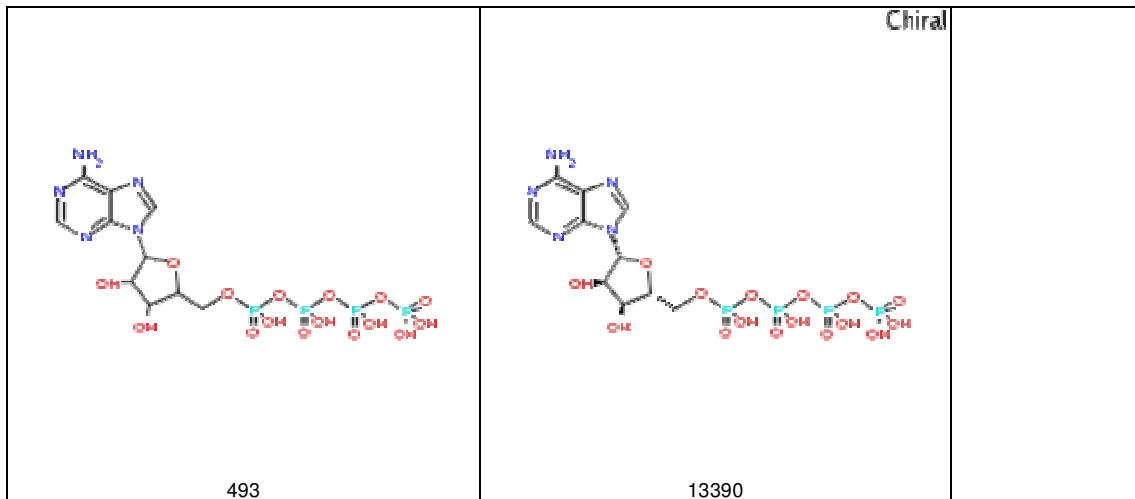

**Name: dehydroascorbic acid**

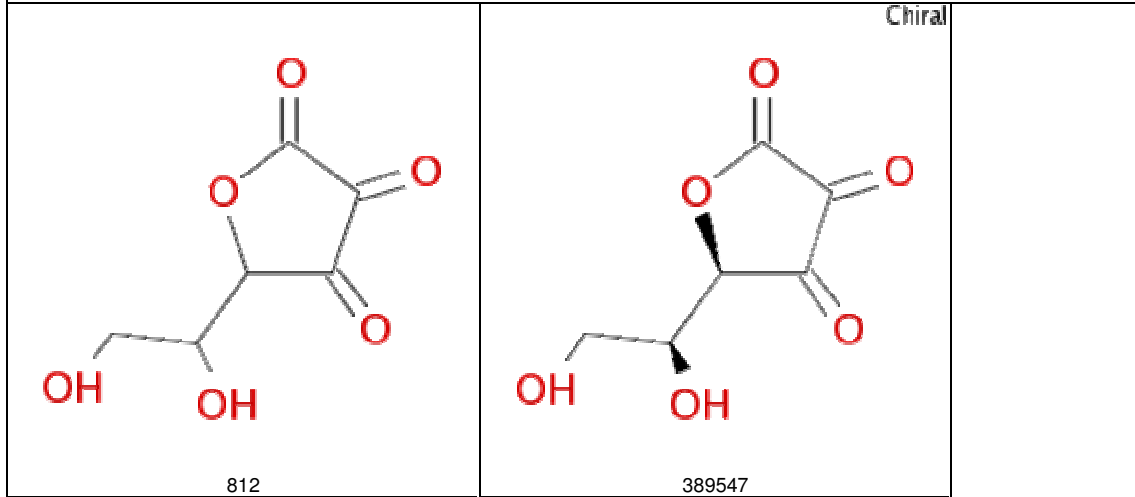

**Name: linoleoyl-CoA**

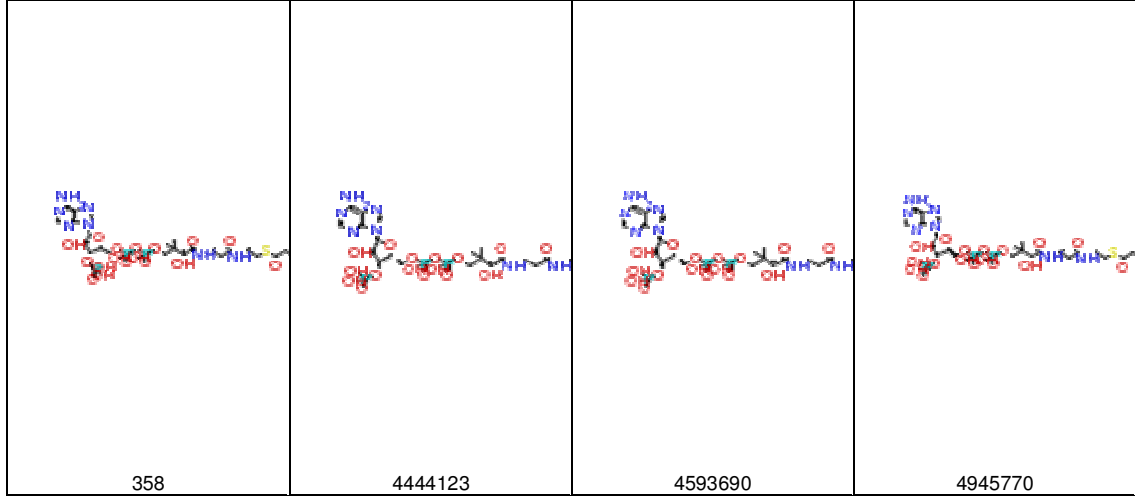

**Name: prostaglandin E2**

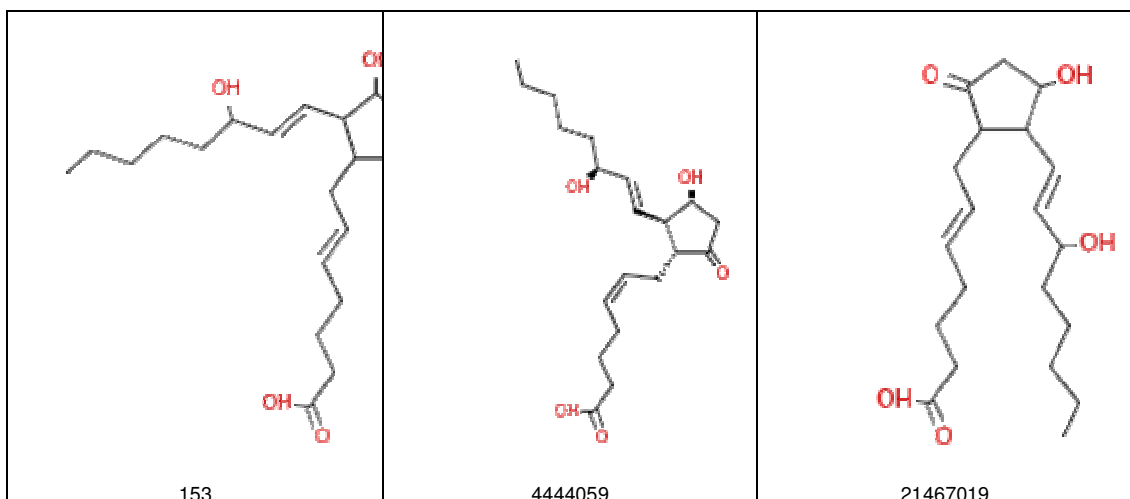

**Name: aminoimidazole ribotide**

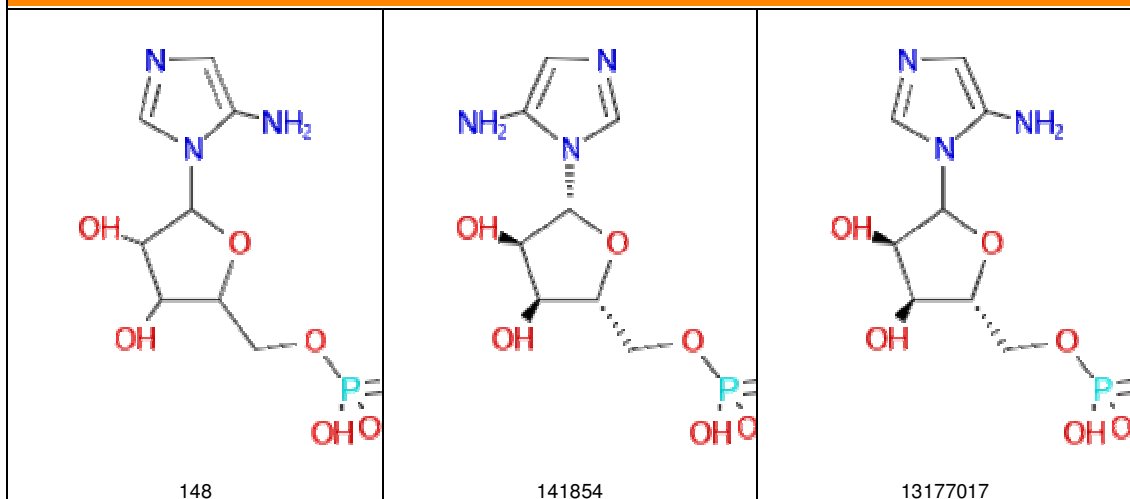

**Name: docosahexaenoic acid**

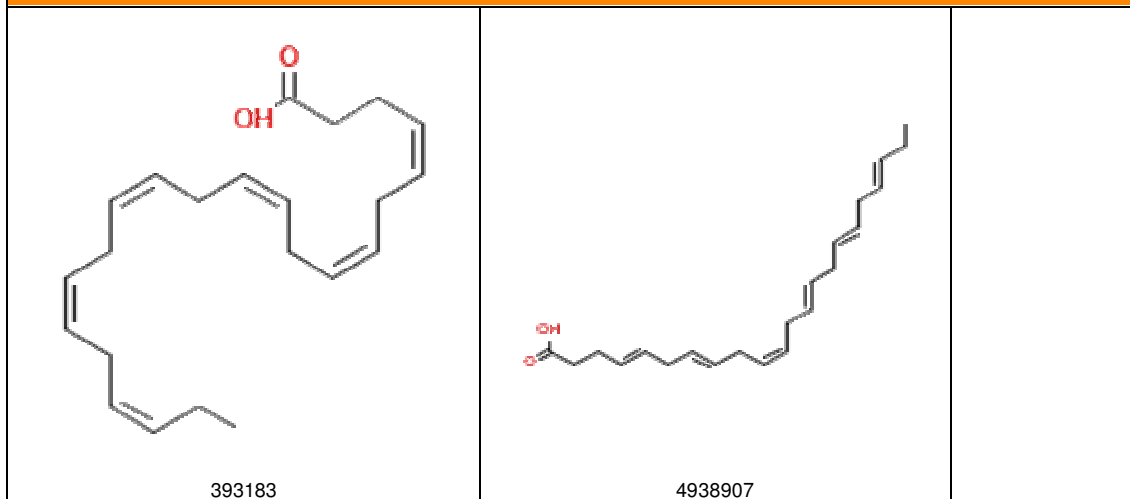

**Name: tubulosine**

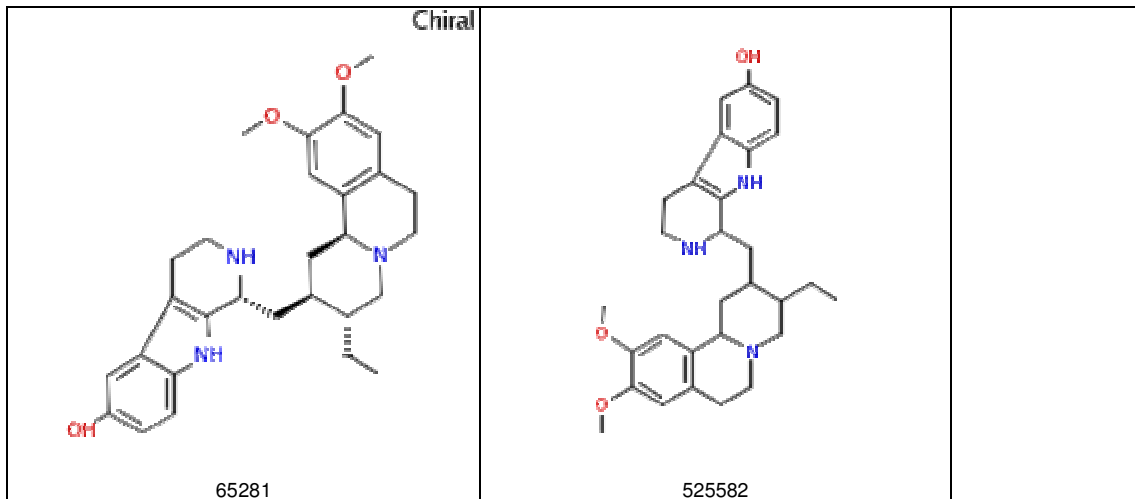

**Name: desmosterol**

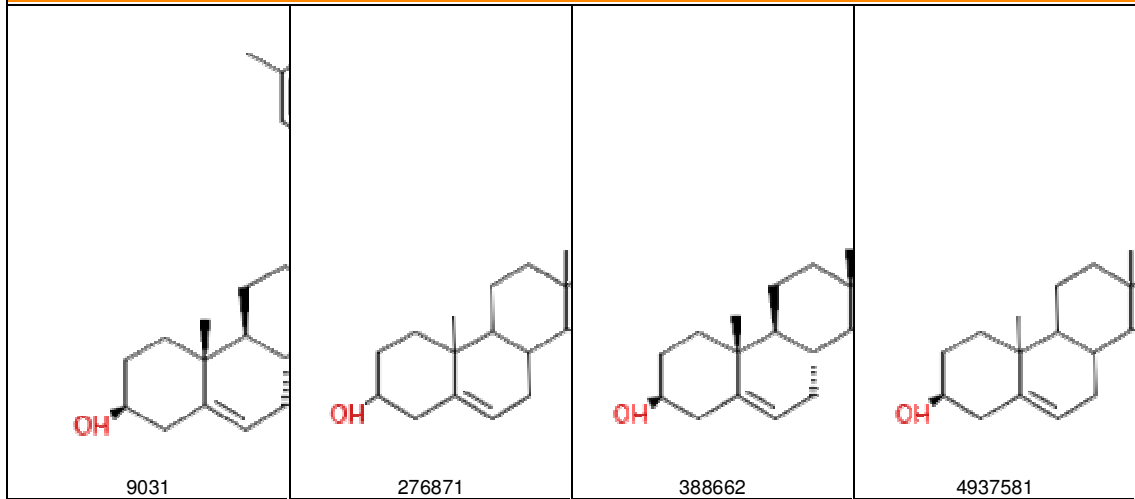

**Name: 7-keto-8-aminopelargonic acid**

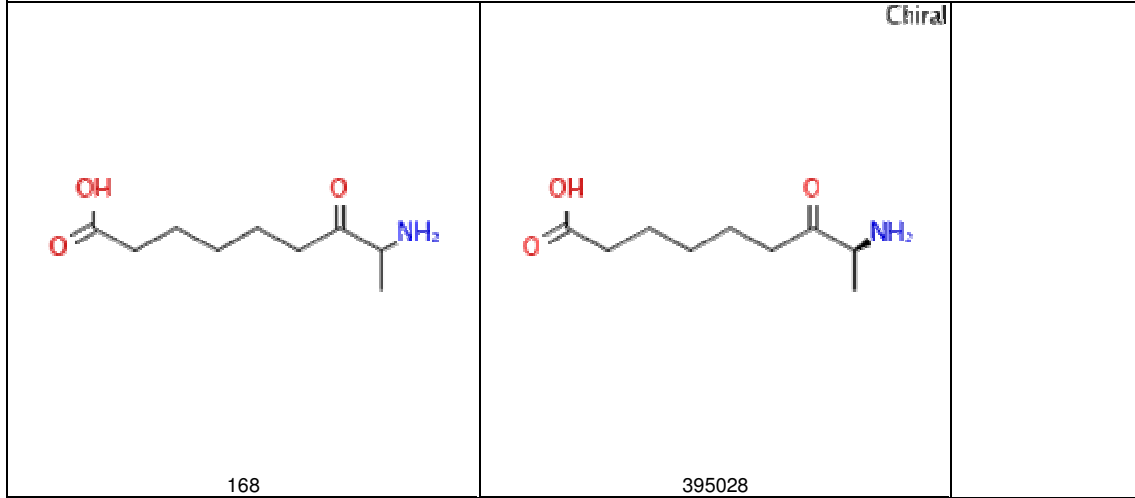

**Name: dTMP**

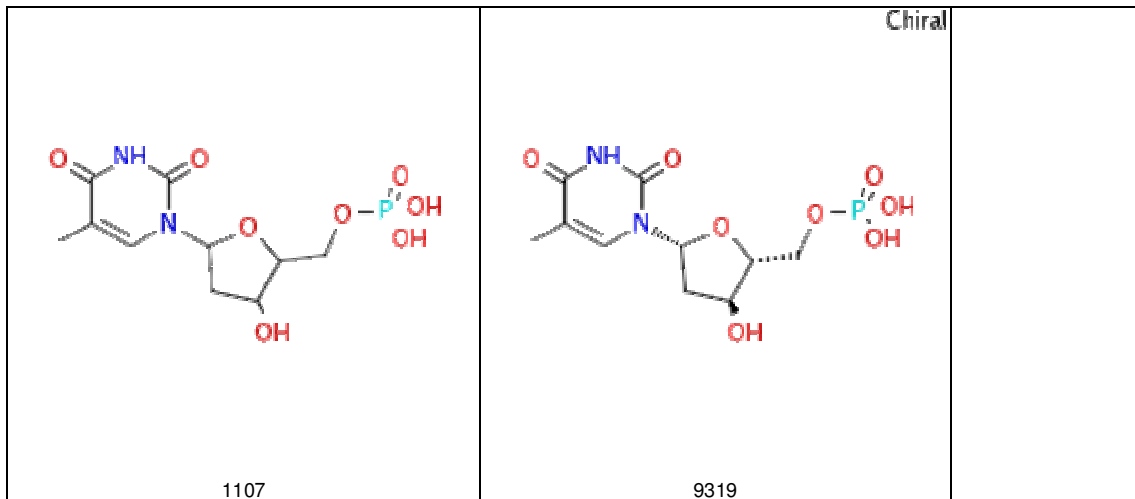

**Name: alpha-lipoic acid**

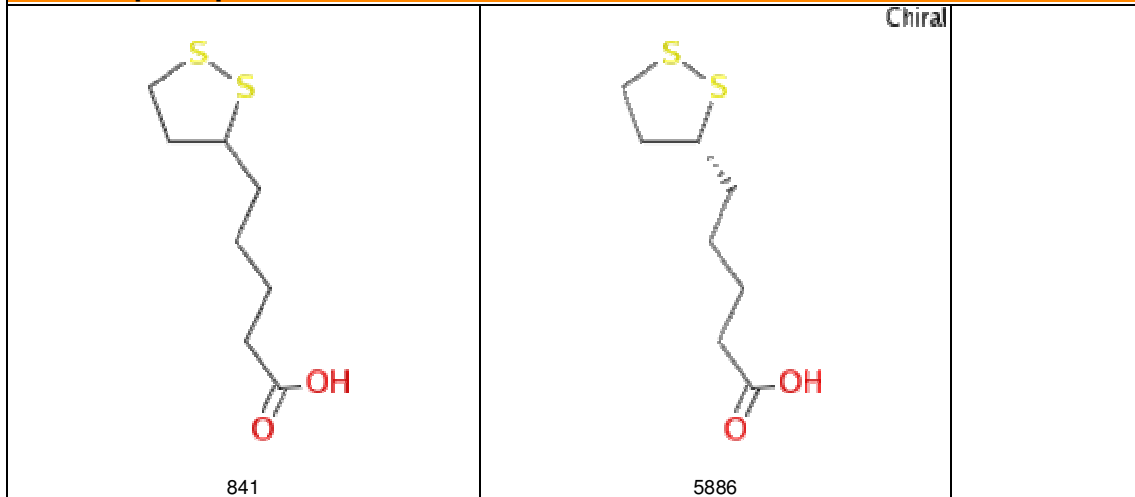

**Name: cholesteryl acetate**

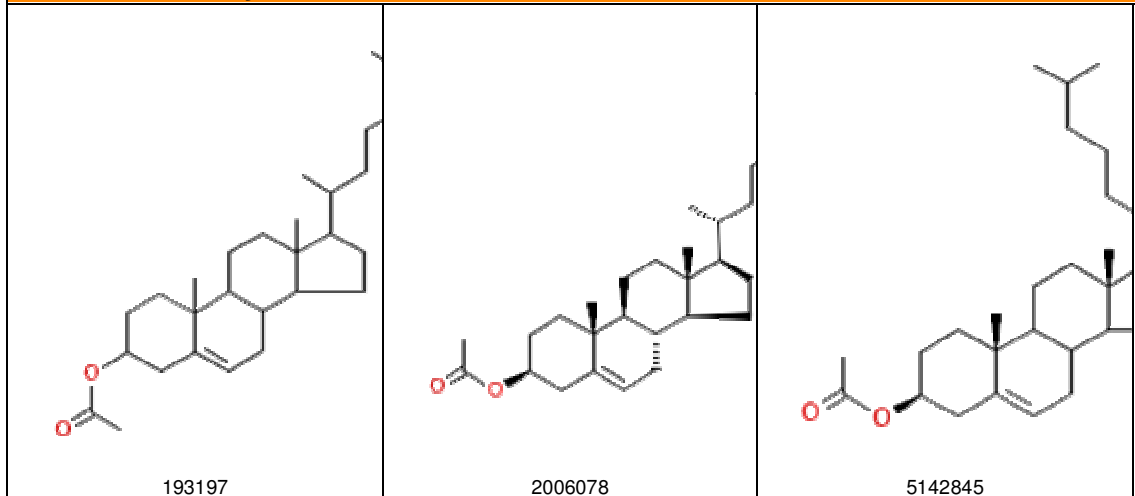

**Name: galactitol**

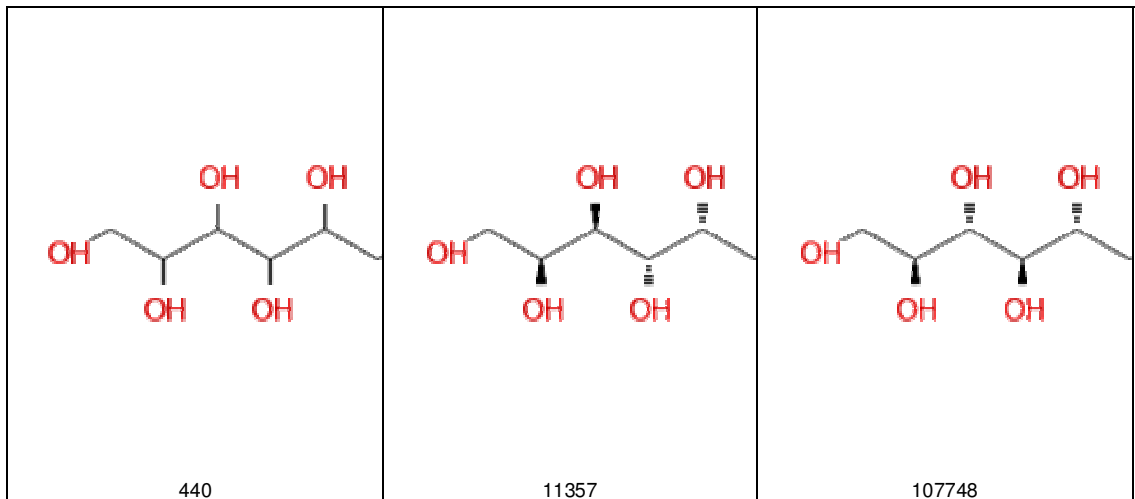

**Name: lipoamide**

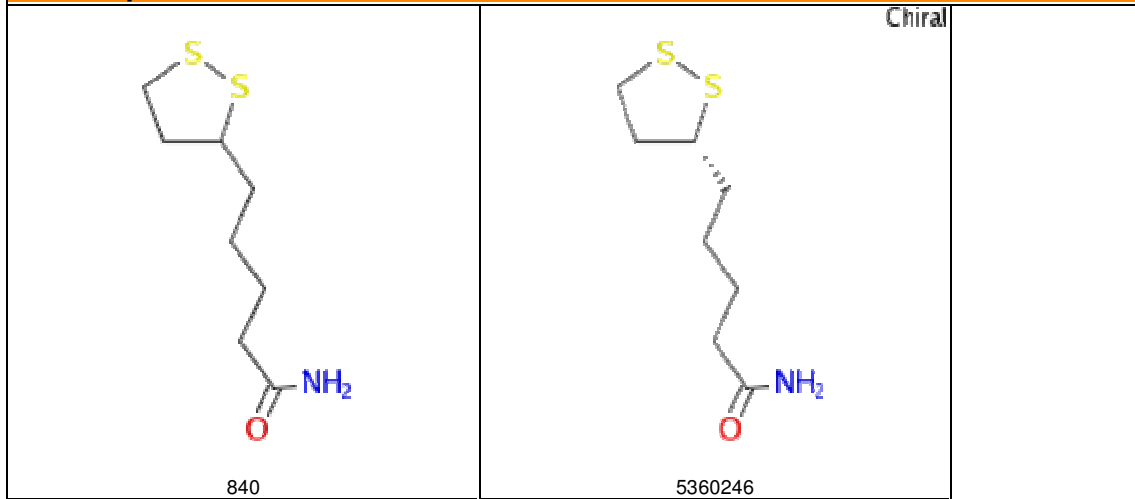

**Name: m-coumaric acid**

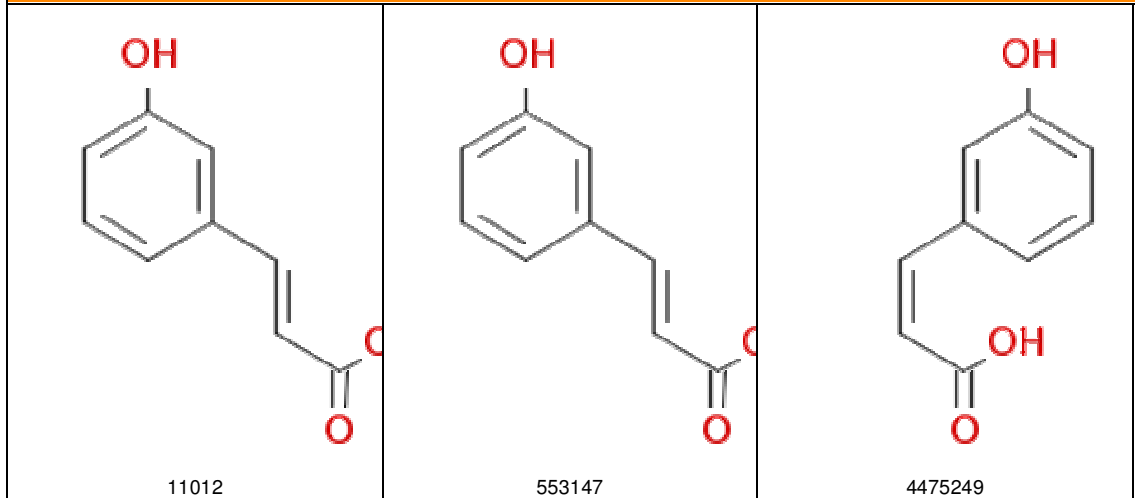

**Name: arachidonoyl-CoA**

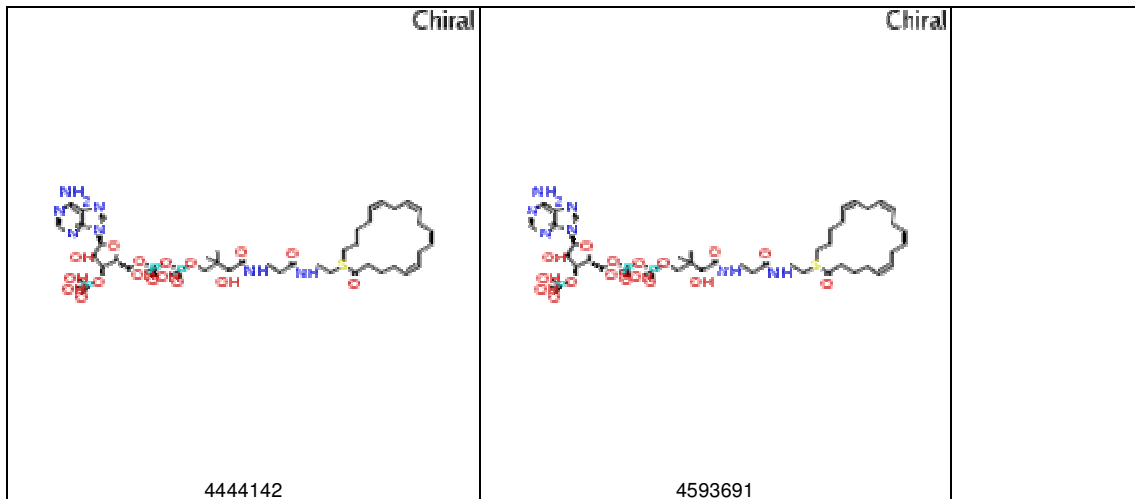

**Name: acetylcholine**

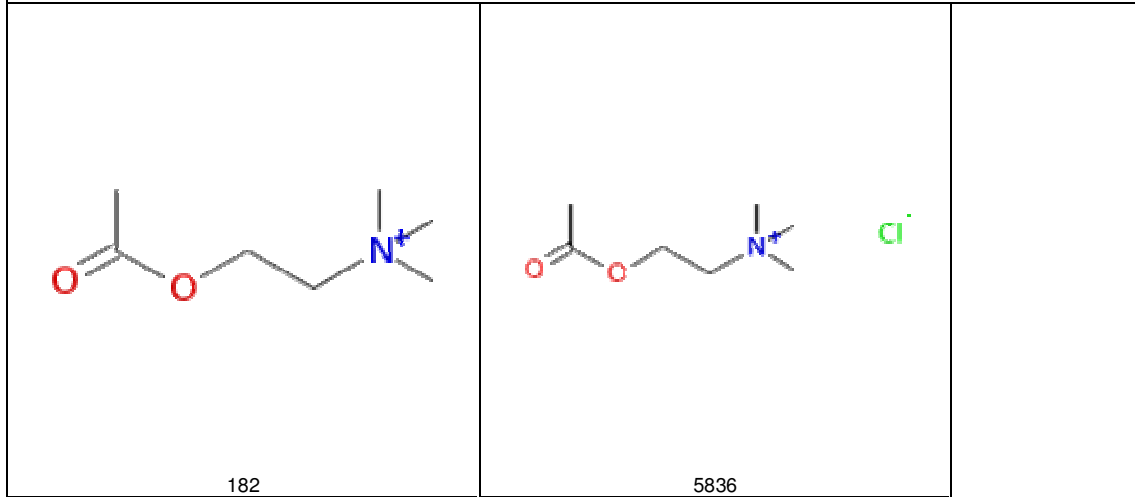

**Name: Homocitric acid**

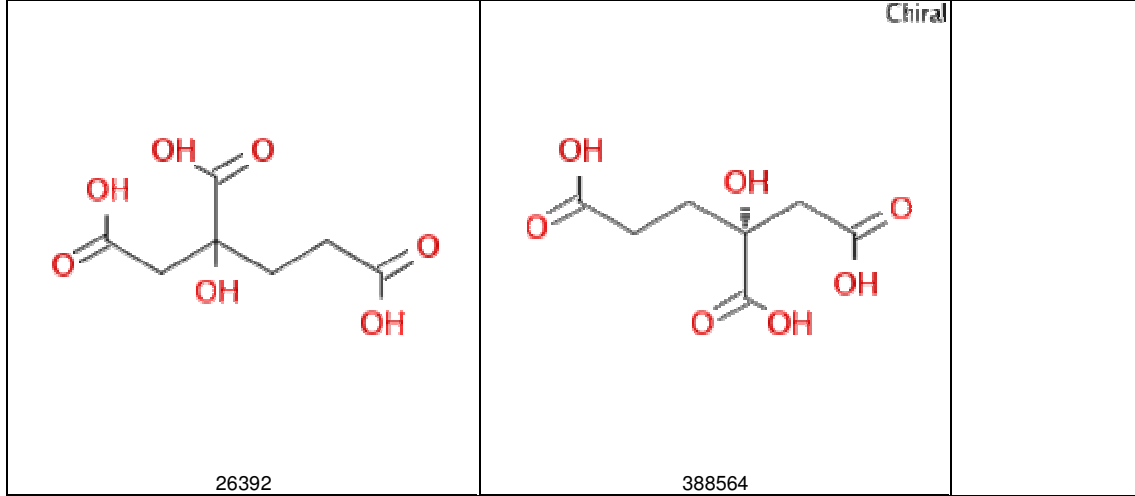

**Name: phytoene**

|                                                                                   |                                                                                    |  |
|-----------------------------------------------------------------------------------|------------------------------------------------------------------------------------|--|
|  |  |  |
| 82595                                                                             | 4444344                                                                            |  |

**Name: 5-formyltetrahydrofolate**

|                                                                                    |                                                                                     |        |
|------------------------------------------------------------------------------------|-------------------------------------------------------------------------------------|--------|
| 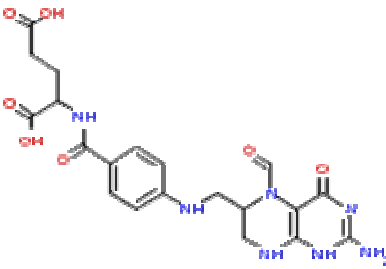 |  | Chiral |
| 140                                                                                | 131714                                                                              |        |

**Name: Selenium**

|                |                |  |
|----------------|----------------|--|
| $\text{SeH}_2$ | $\text{SeH}_2$ |  |
| 518            | 4885617        |  |

**Name: Limonene**



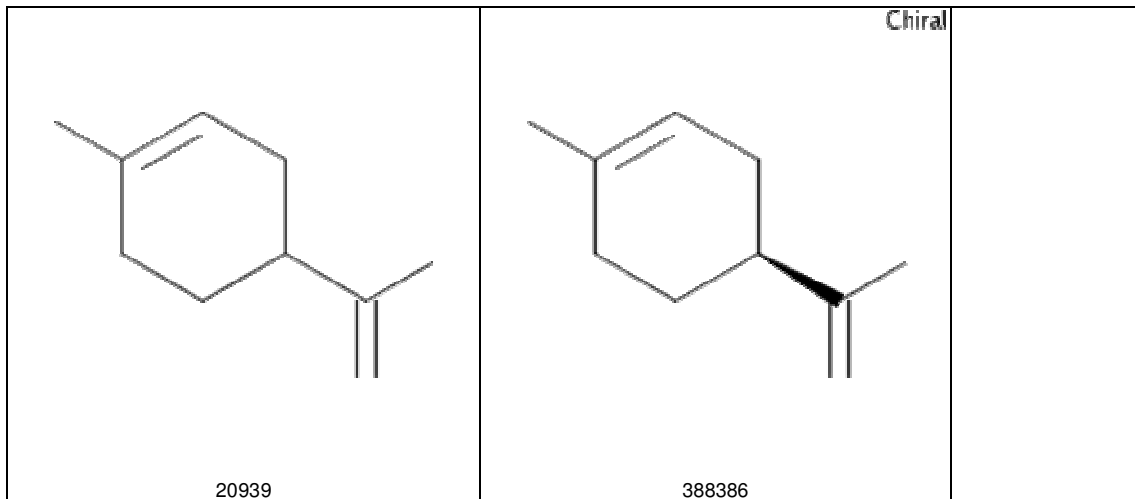

Name: selenocysteine

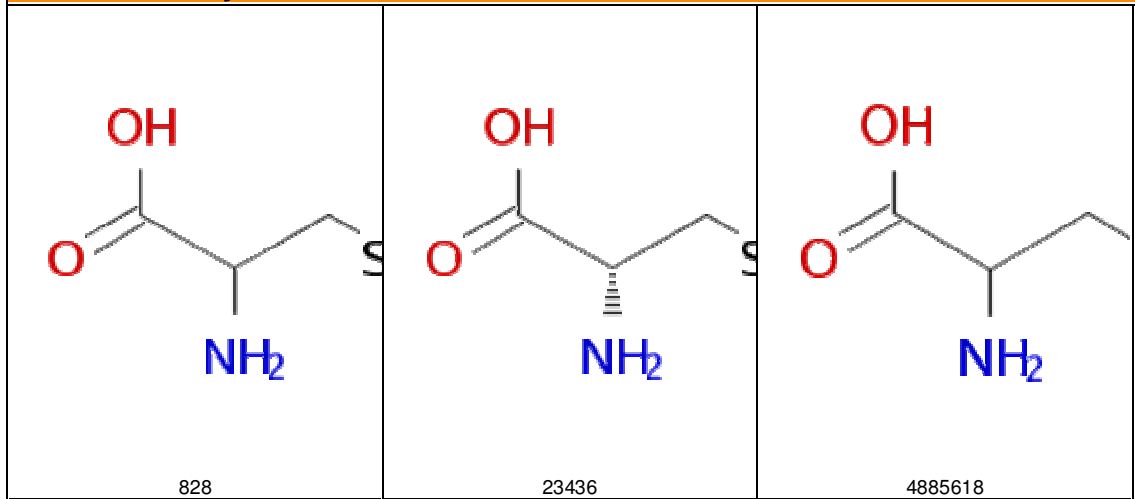

Name: D-glyceraldehyde

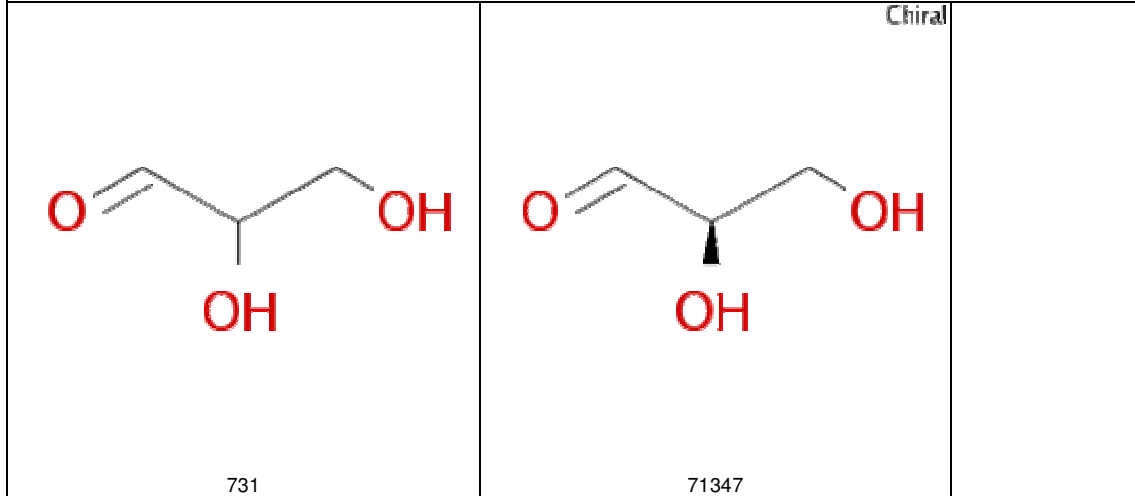

Name: dUMP

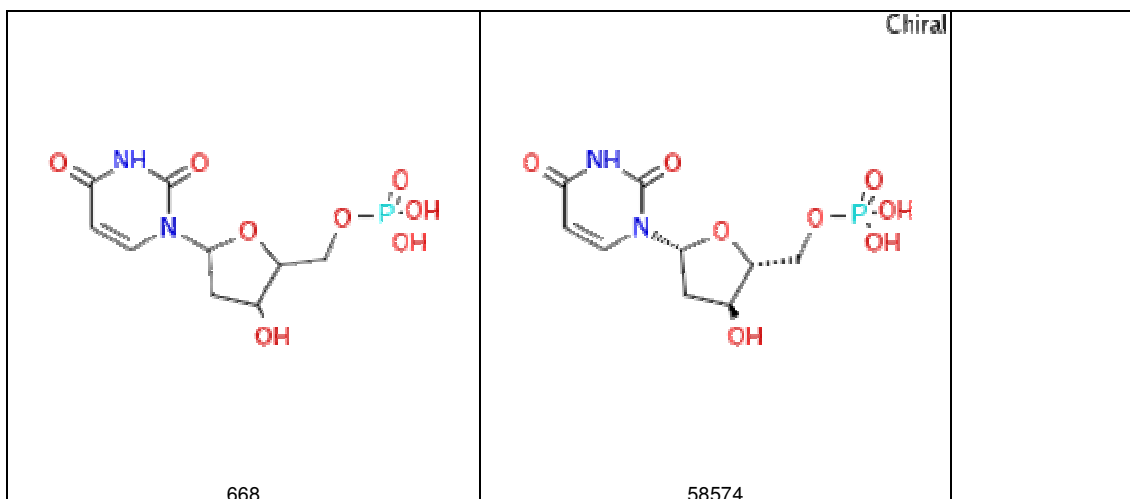

**Name: S-nitrosoglutathione**

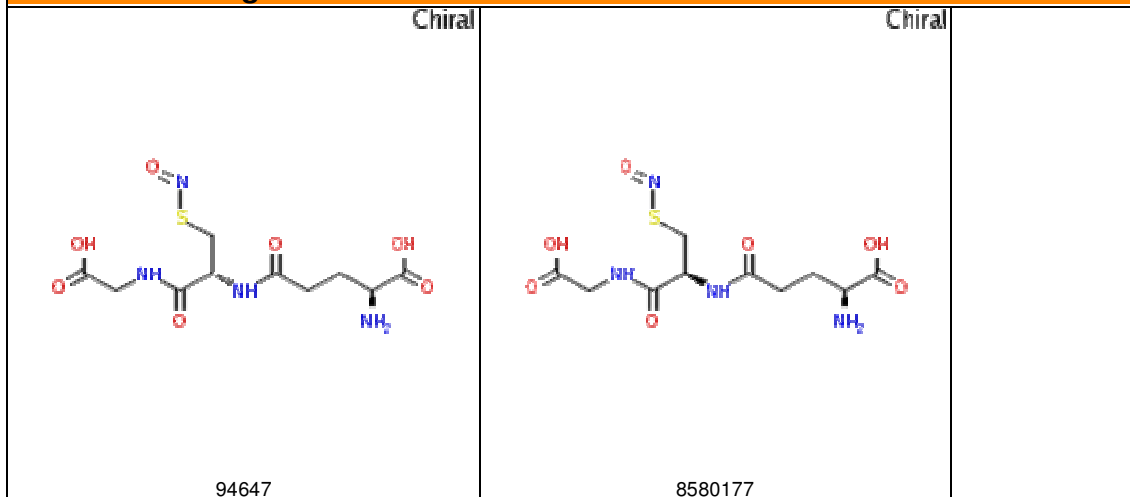

**Name: CoA**

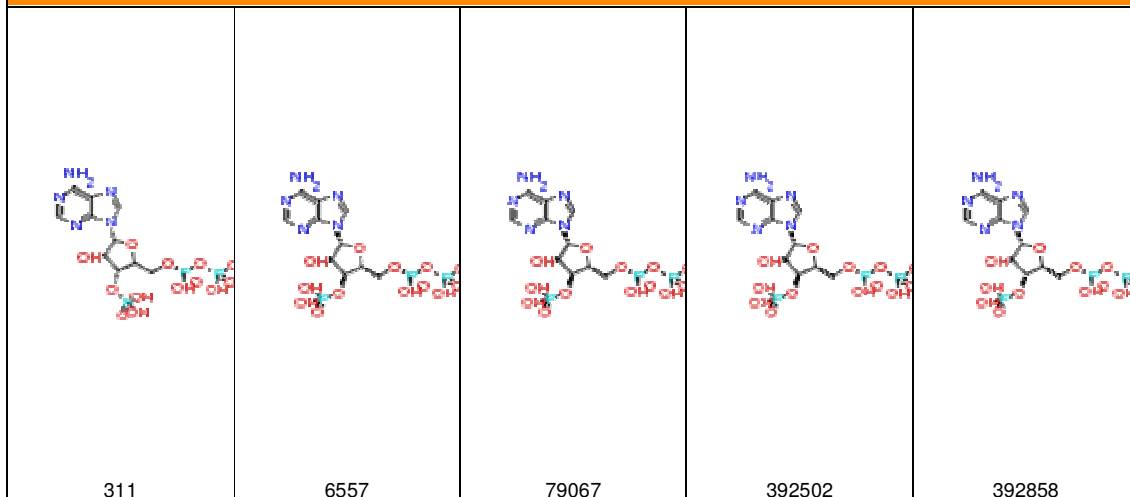

|                                                                                   |                                                                                   |                                                                                   |  |
|-----------------------------------------------------------------------------------|-----------------------------------------------------------------------------------|-----------------------------------------------------------------------------------|--|
| 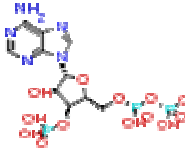 |  |  |  |
| 394548                                                                            | 395283                                                                            | 4484169                                                                           |  |

**Name: COA**

|                                                                                    |                                                                                    |                                                                                    |                                                                                     |                                                                                      |
|------------------------------------------------------------------------------------|------------------------------------------------------------------------------------|------------------------------------------------------------------------------------|-------------------------------------------------------------------------------------|--------------------------------------------------------------------------------------|
| 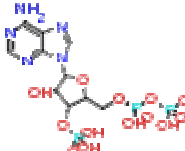 |  |  |  |  |
| 311                                                                                | 6557                                                                               | 79067                                                                              | 392502                                                                              | 392858                                                                               |

|                                                                                     |                                                                                     |                                                                                     |  |
|-------------------------------------------------------------------------------------|-------------------------------------------------------------------------------------|-------------------------------------------------------------------------------------|--|
| 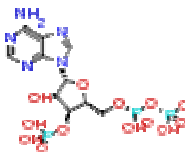 |  |  |  |
| 394548                                                                              | 395283                                                                              | 4484169                                                                             |  |

**Name: monoamine**

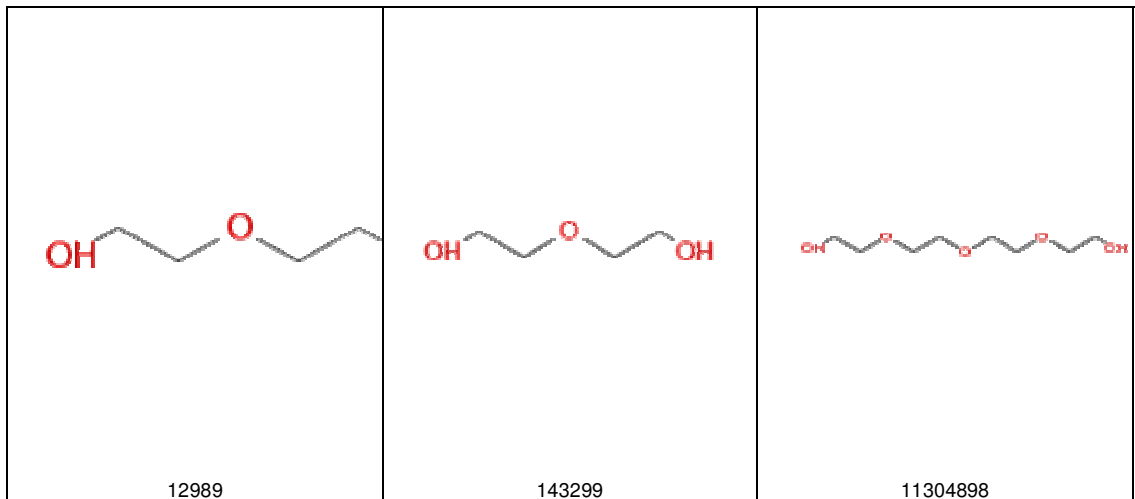

**Name: beta-sitosterol**

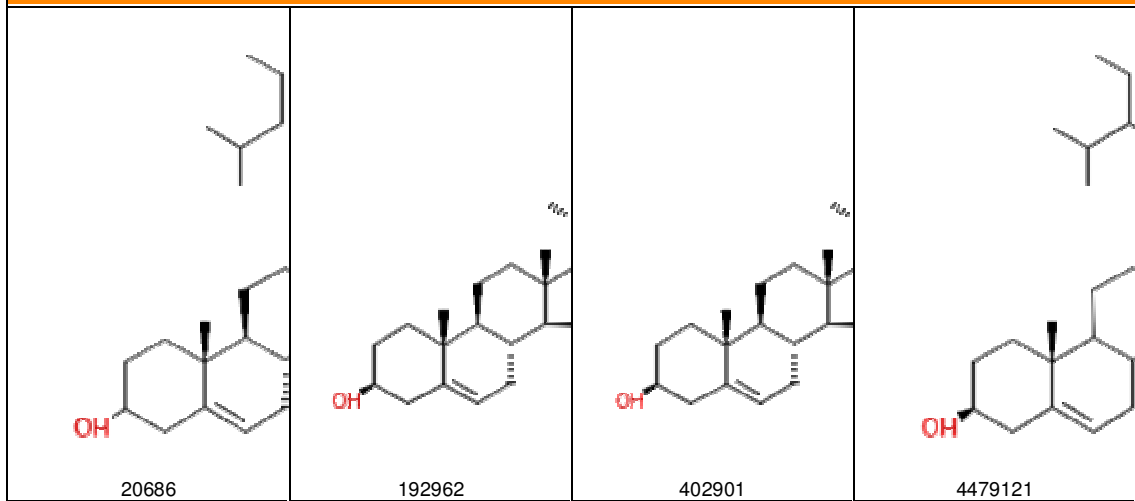

**Name: dUDP**

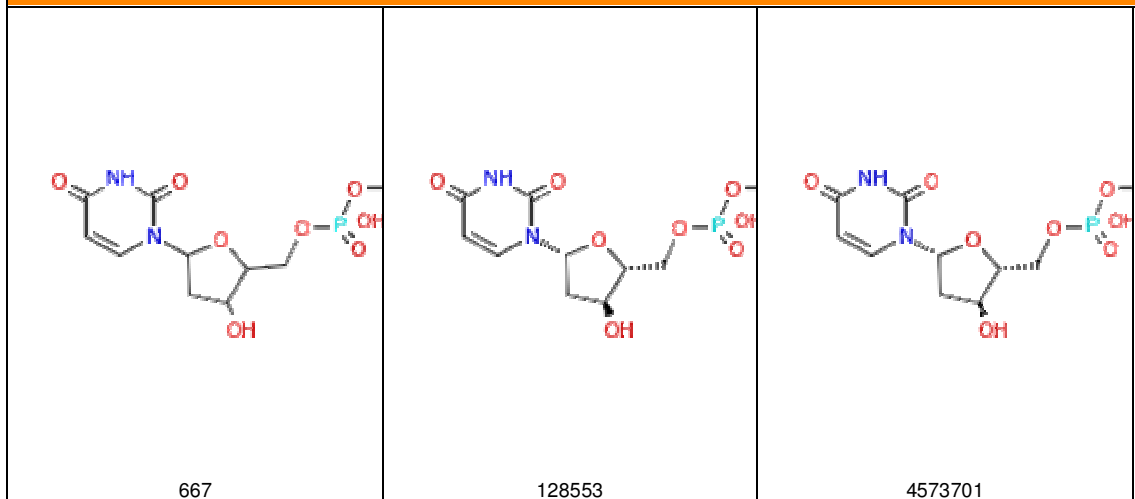

**Name: chorismic acid**

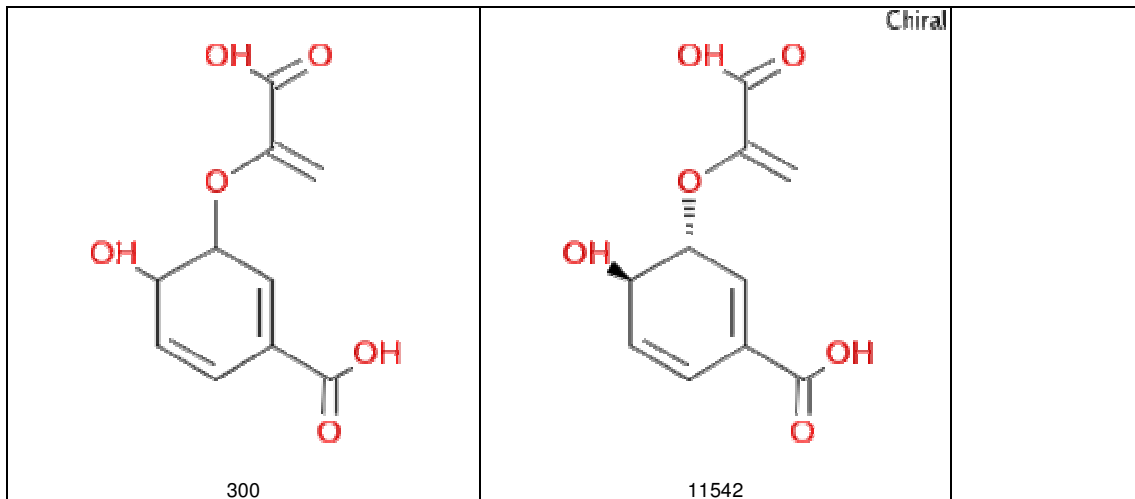

Name: formyl-CoA

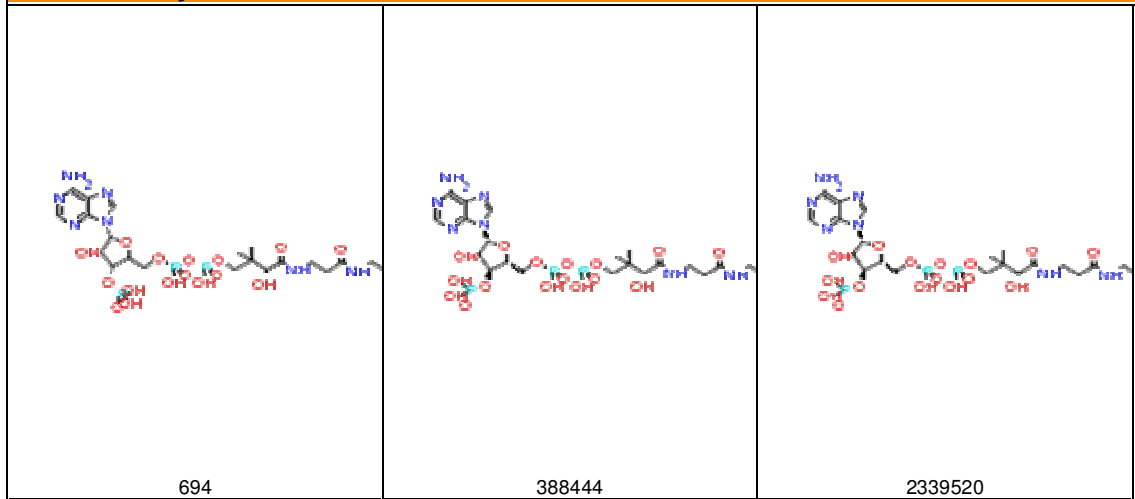

Name: 4,4-dimethyl-5alpha-cholesta-8,14,24-trien-3beta-ol

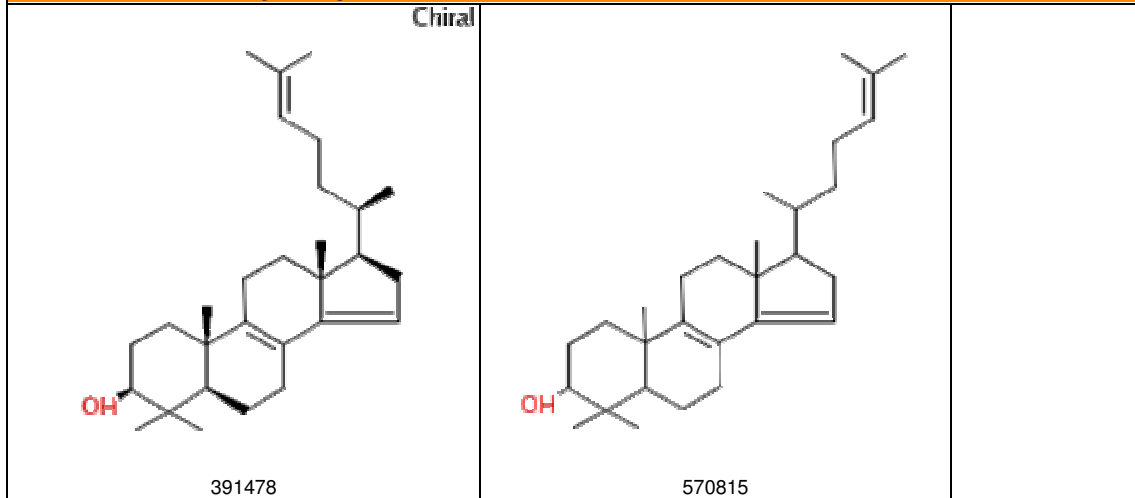

Name: 2'-deoxycytidine

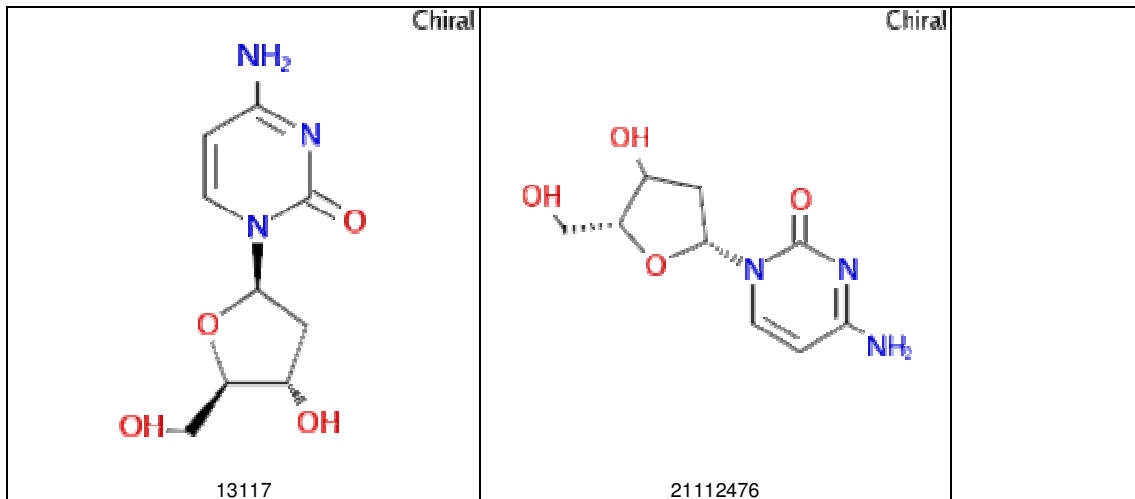

**Name: Mycophenolic acid**

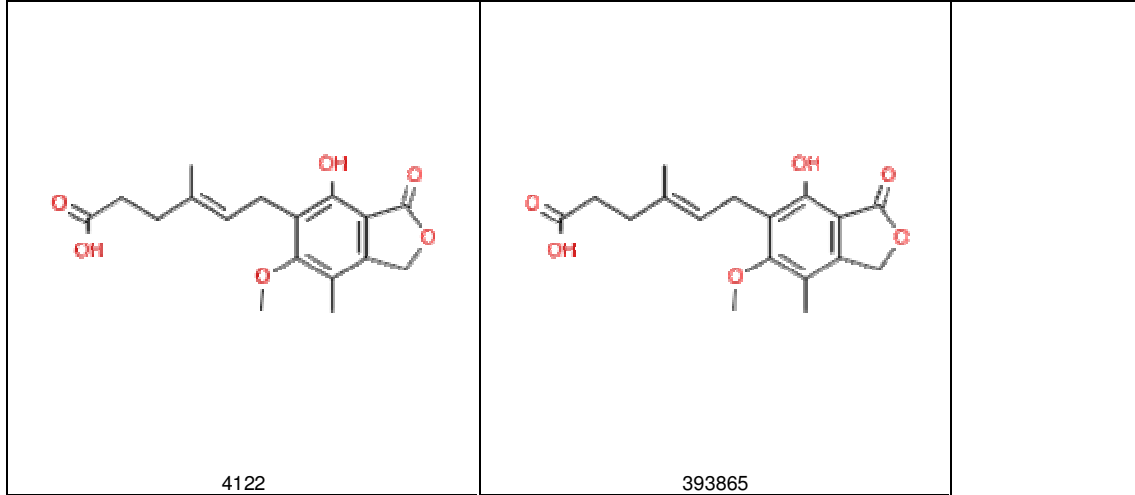

**Name: Desferrioxamine**

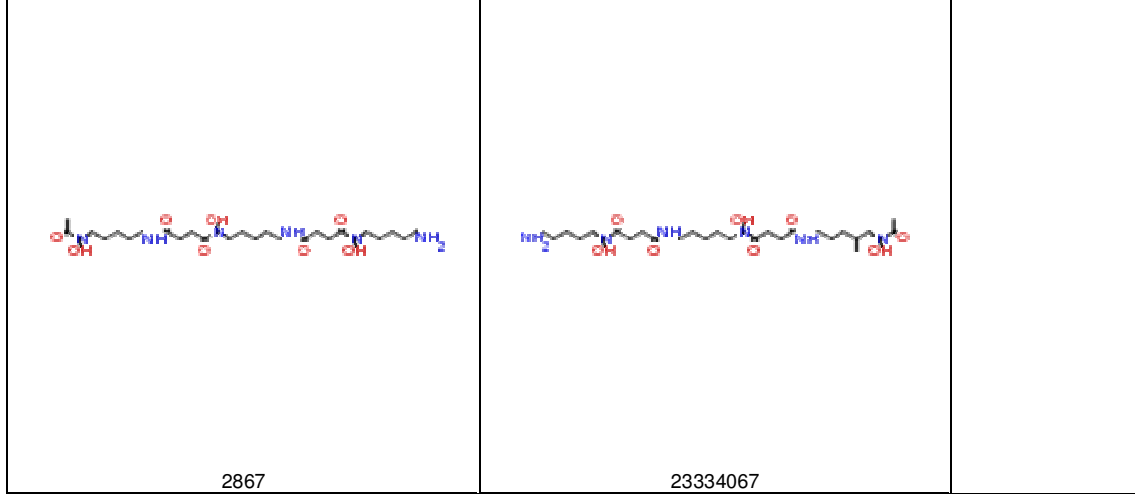

**Name: guanylate**

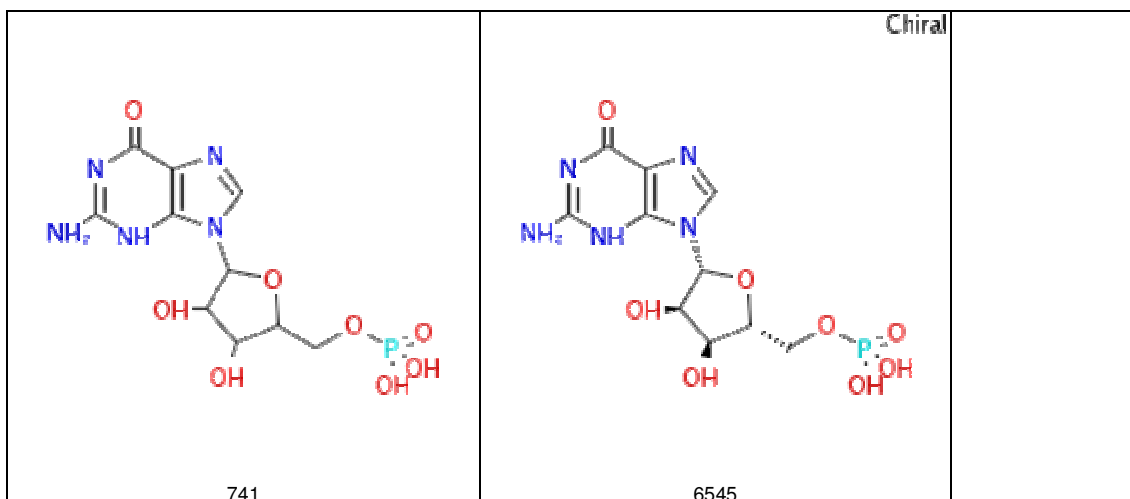

**Name: 5-diphosphoinositol pentakisphosphate**

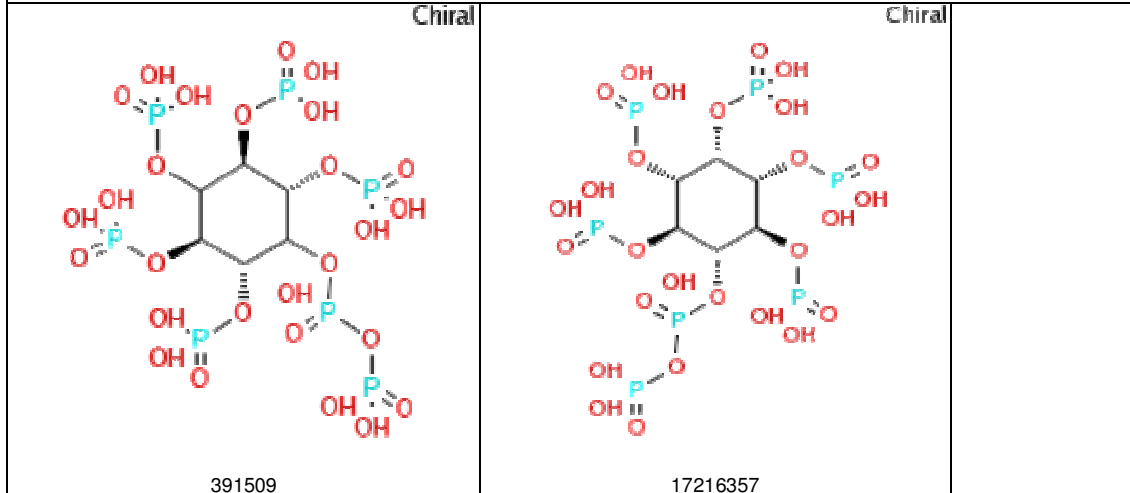

**Name: 8-oxo-dG**

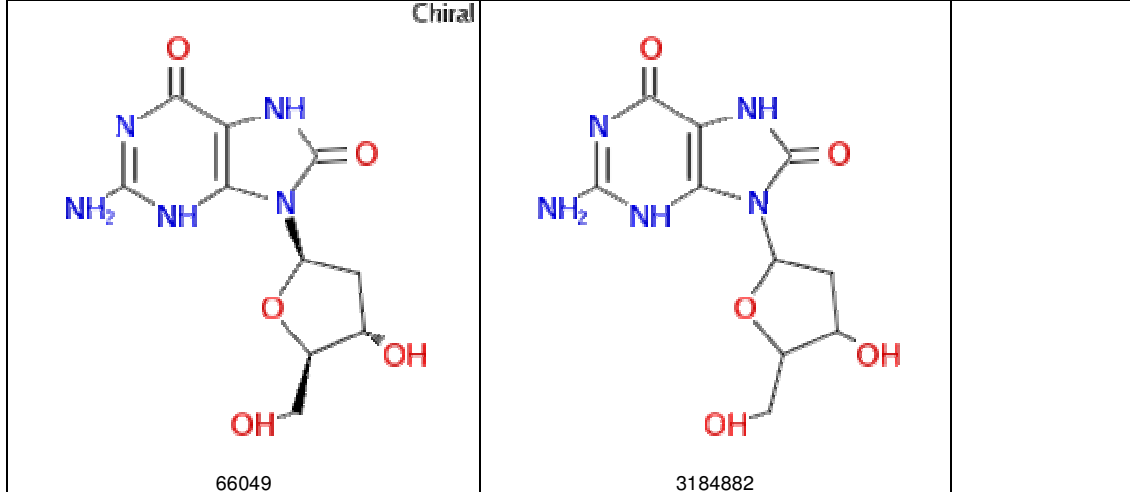

**Name: Shikimic acid**

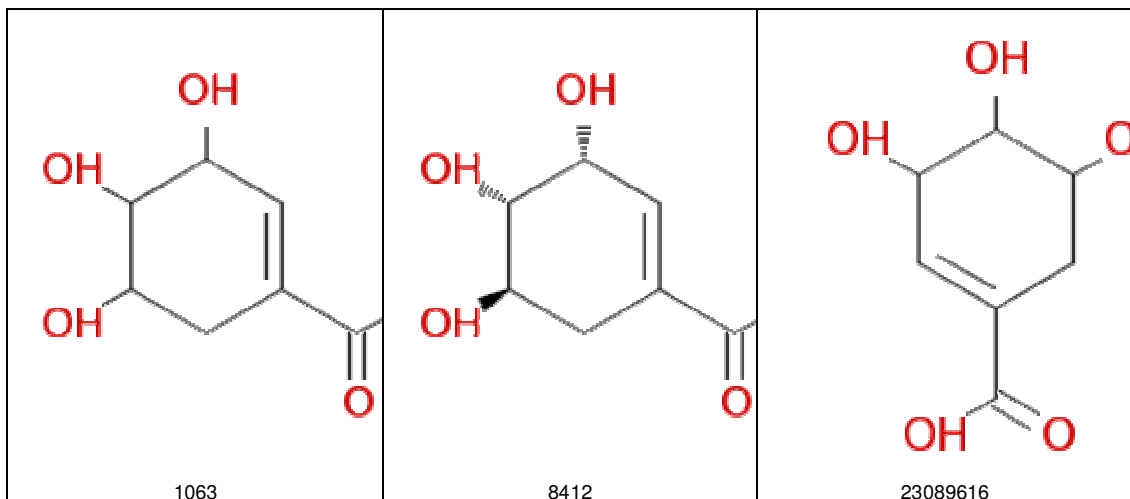

**Name: Resveratrol**

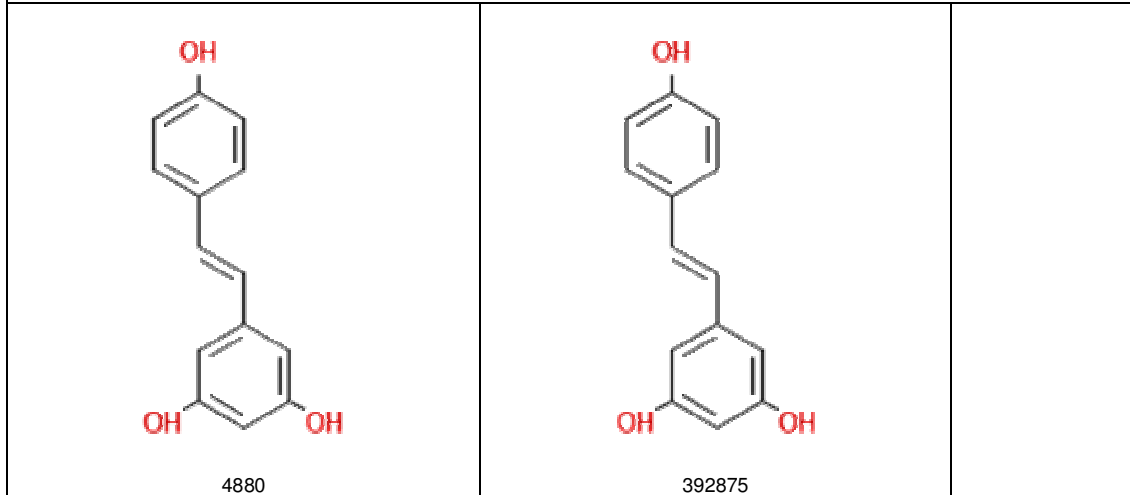

**Name: D-threitol**

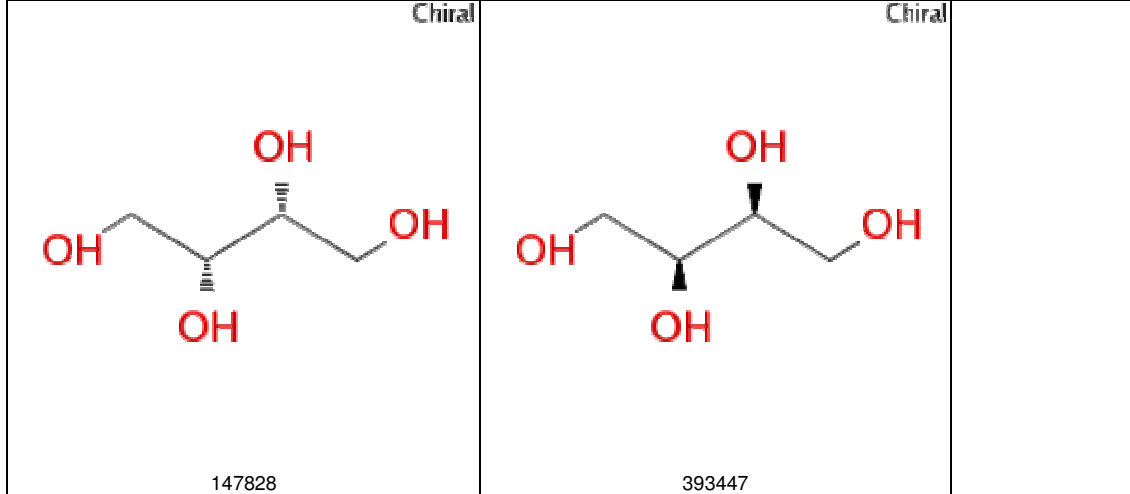

**Name: Tomatidine**



|       |        |        |         |         |
|-------|--------|--------|---------|---------|
|       |        |        |         |         |
| 59019 | 201623 | 276680 | 4479571 | 4937941 |

**Name: L-methionine sulfoxide**

|     |        |        |
|-----|--------|--------|
|     |        | Chiral |
| 824 | 139840 |        |

**Name: emetine**

|      |      |         |     |
|------|------|---------|-----|
|      |      |         | HCl |
| 9055 | 9802 | 4642430 |     |

**Name: Farnesol**

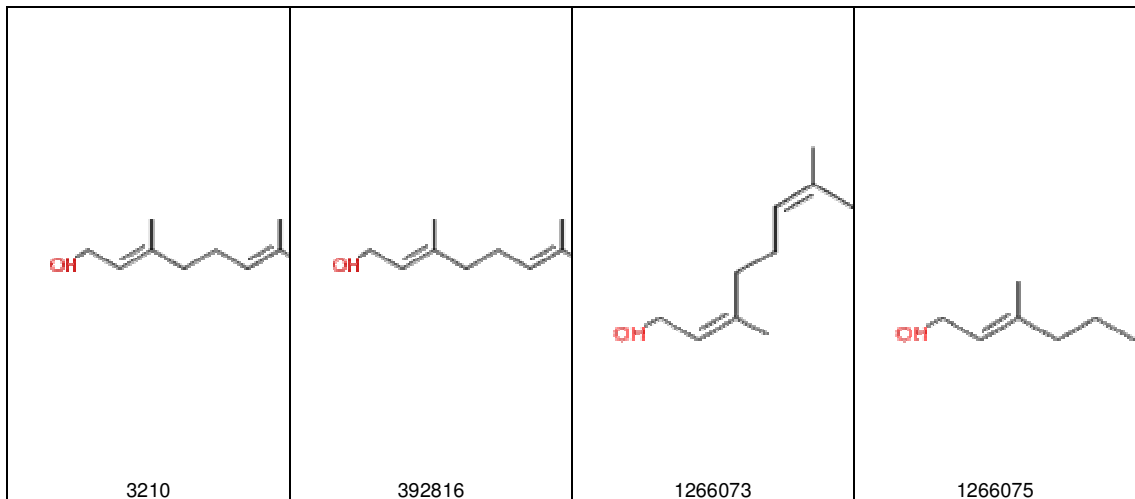

Name: D-isoleucine

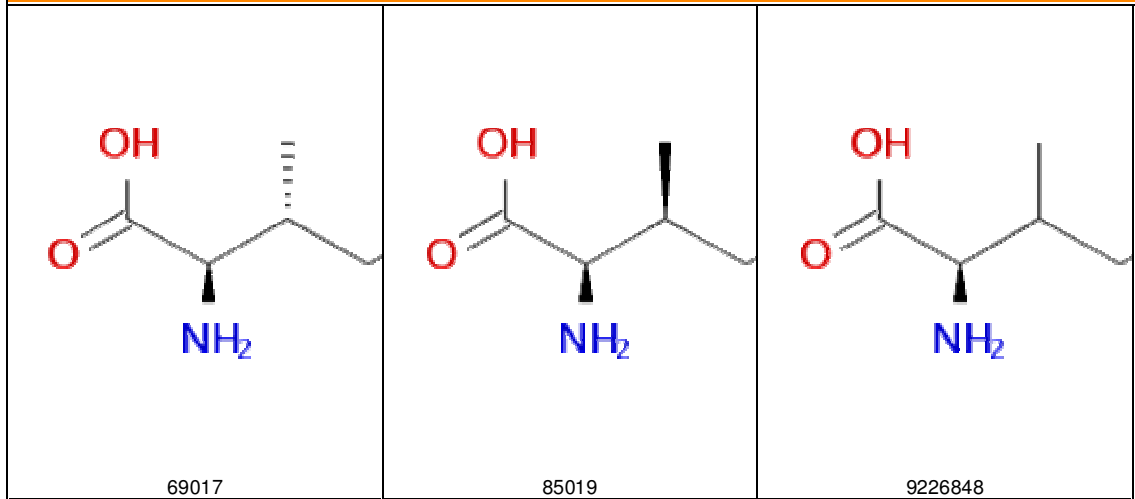

Name: dephospho-CoA

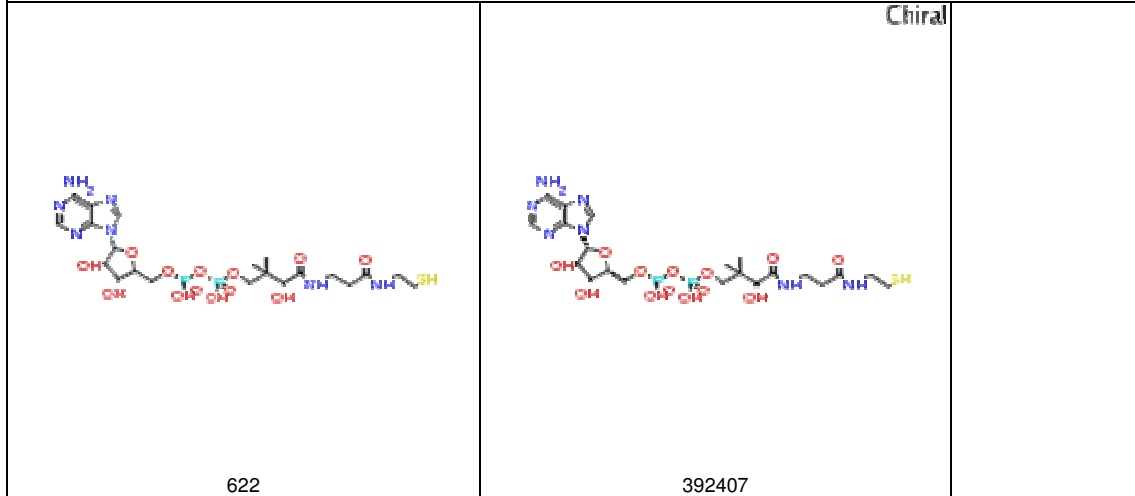

Name: lycorine

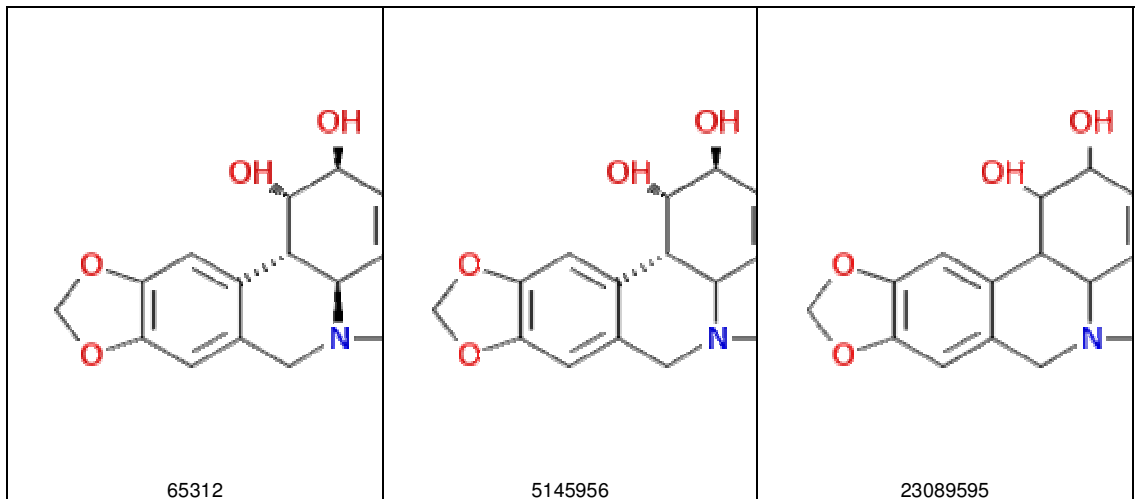

**Name: inositol 1,4-bisphosphate**

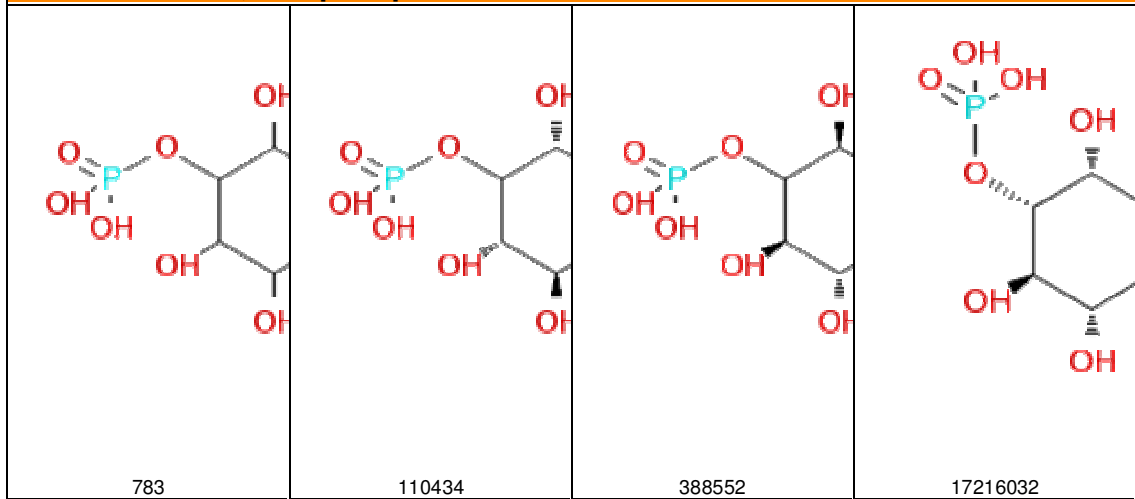

**Name: tryptophan tRNA**

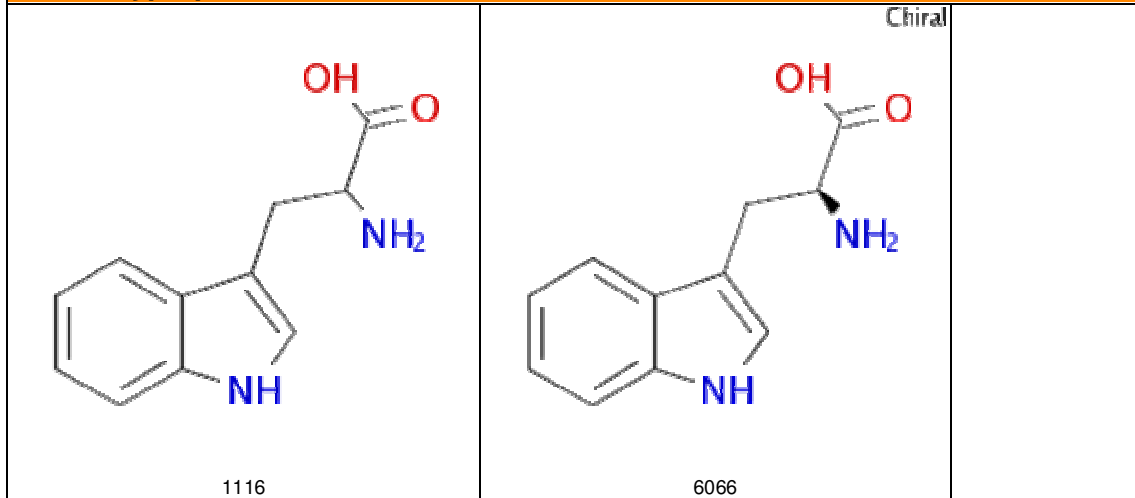

**Name: S-adenosyl-homocysteine**

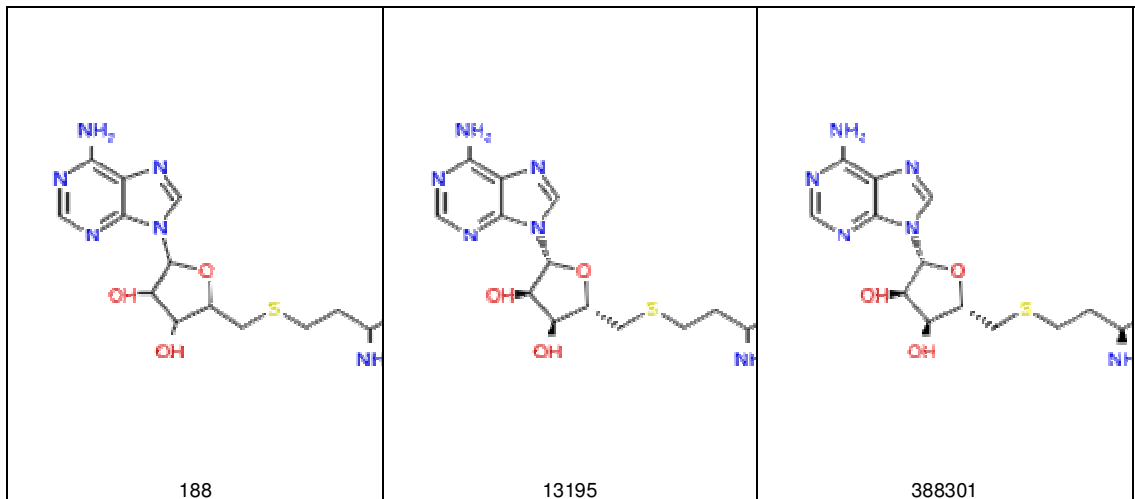

**Name: sirohydrochlorin**

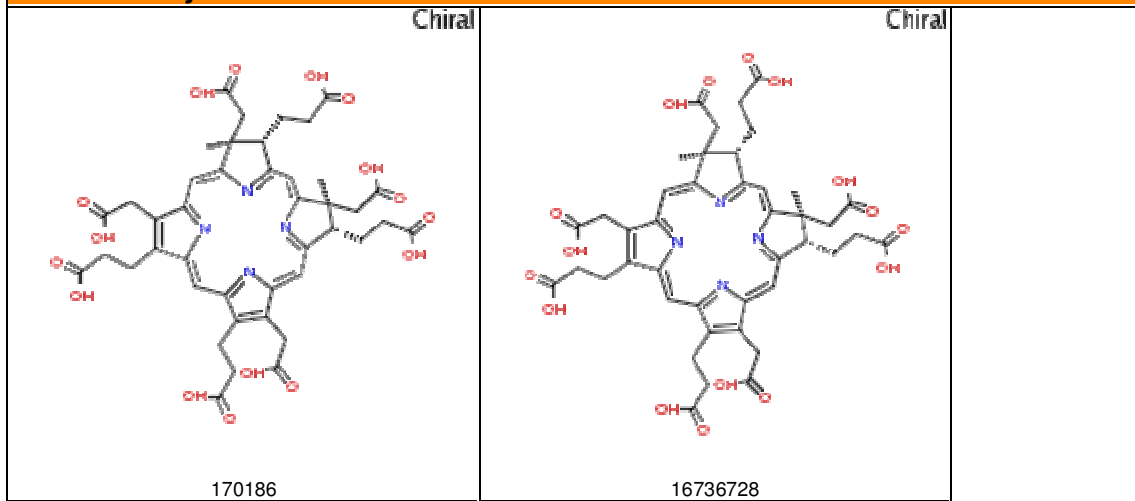

**Name: proline tRNA**

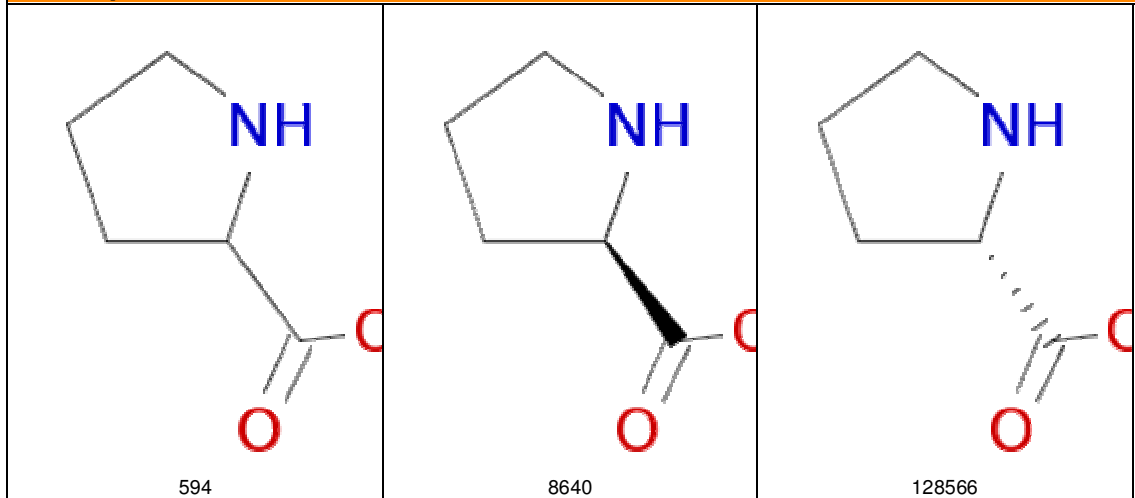

**Name: gibberellin**

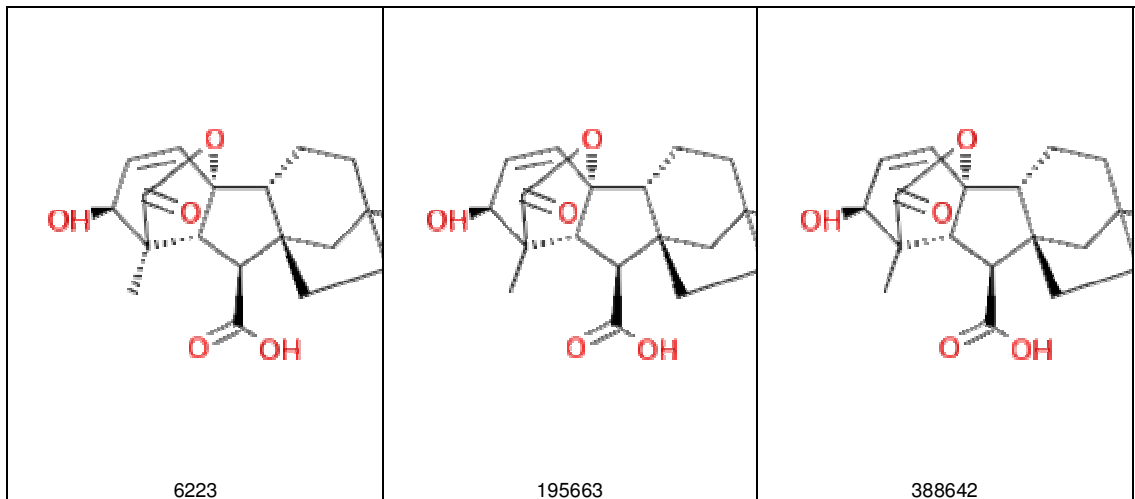

**Name: acetoacetyl-CoA**

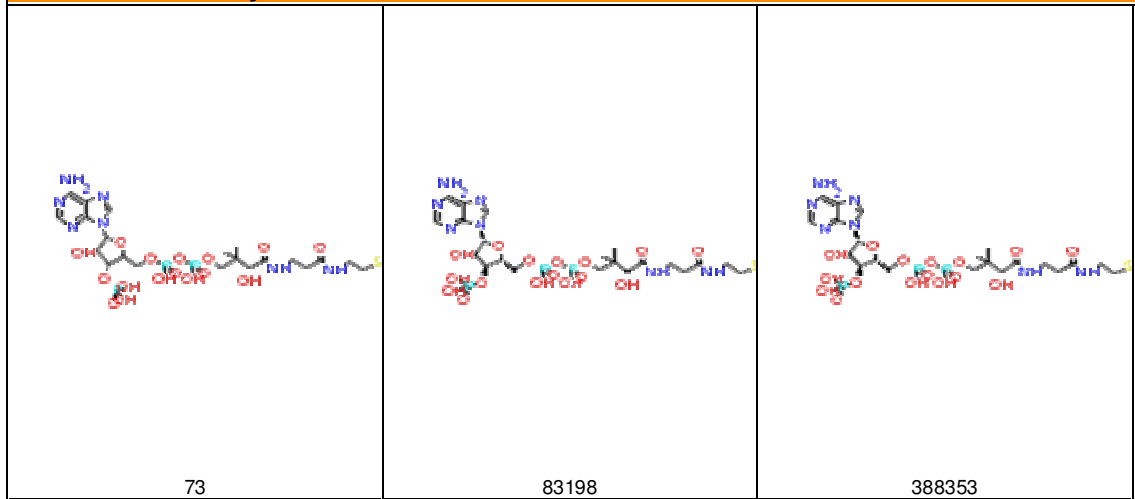

**Name: glutamine tRNA**

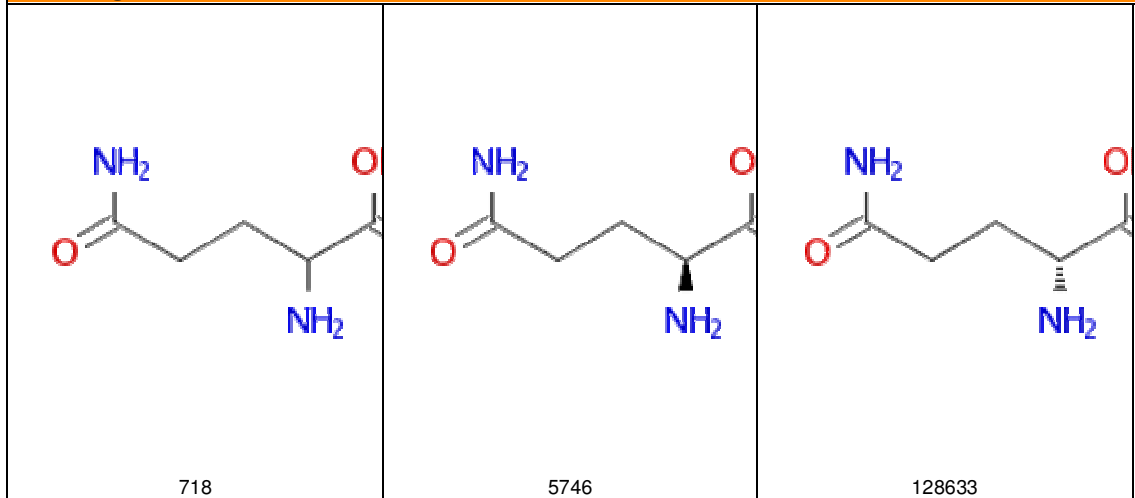

**Name: phenylacetyl-CoA**

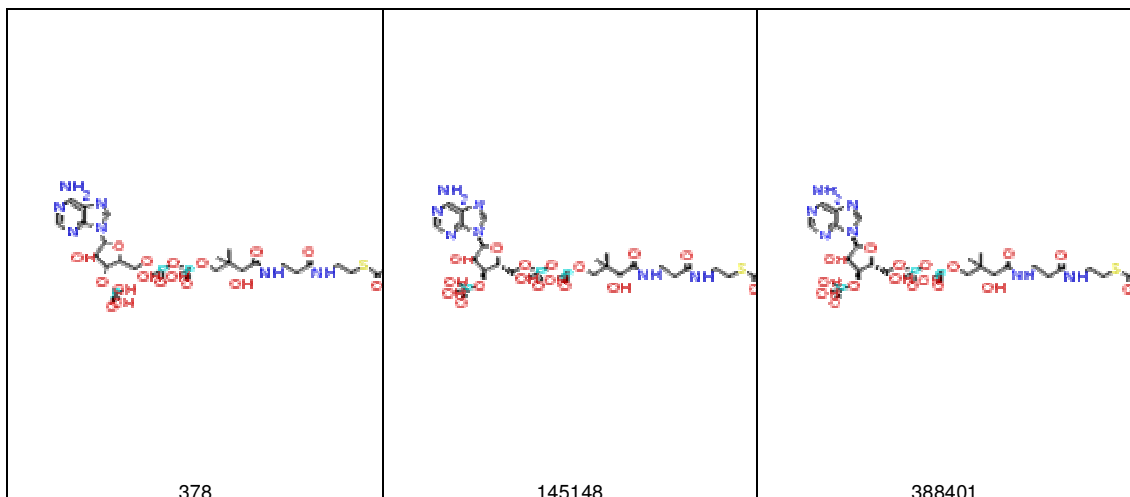

**Name: sulfatide**

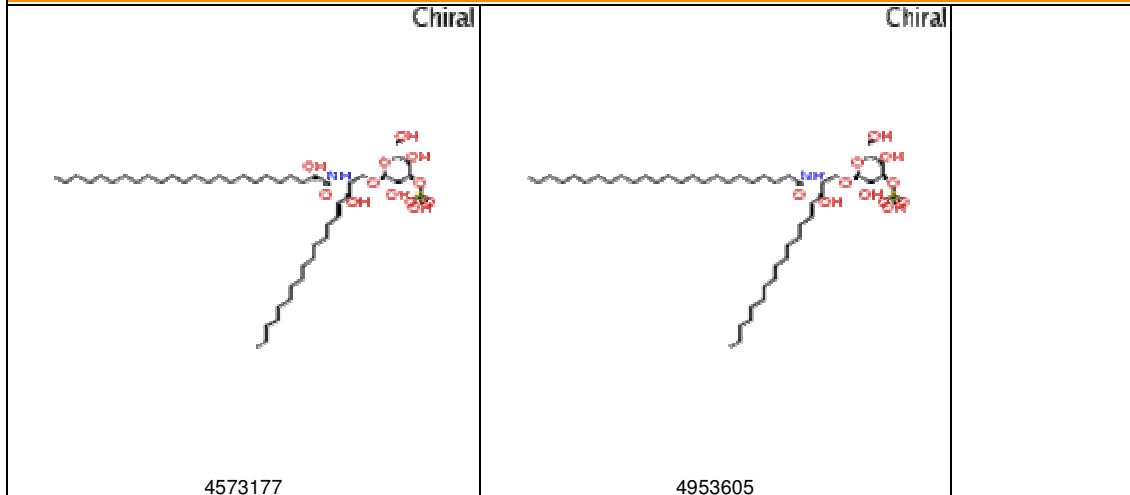

**Name: melezitose**

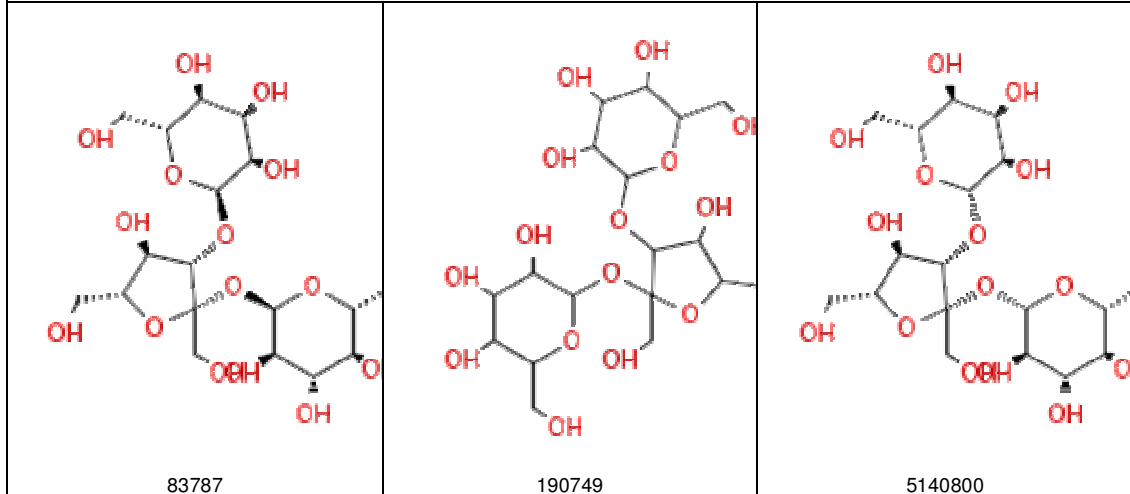

**Name: Cellobiose**

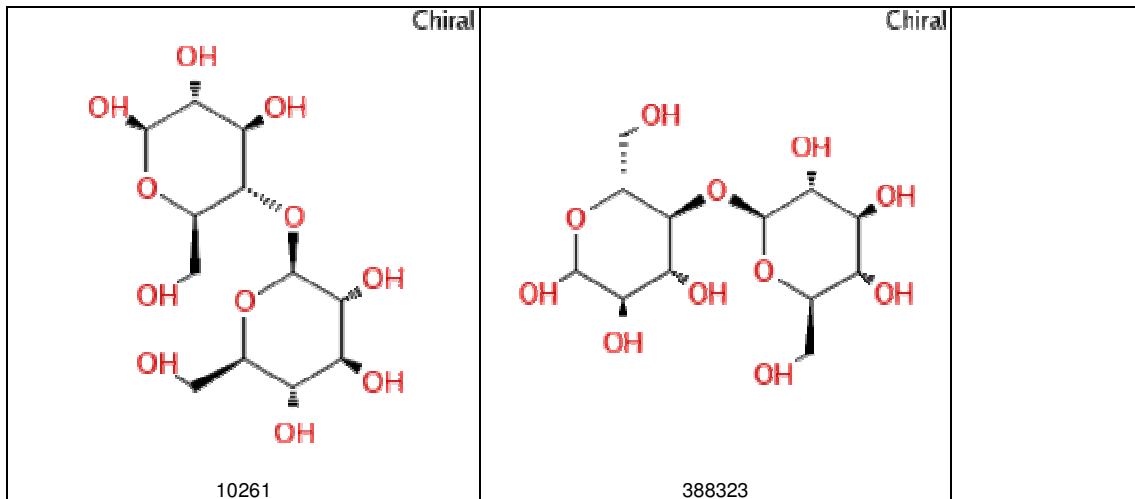

**Name: scyllo-inositol**

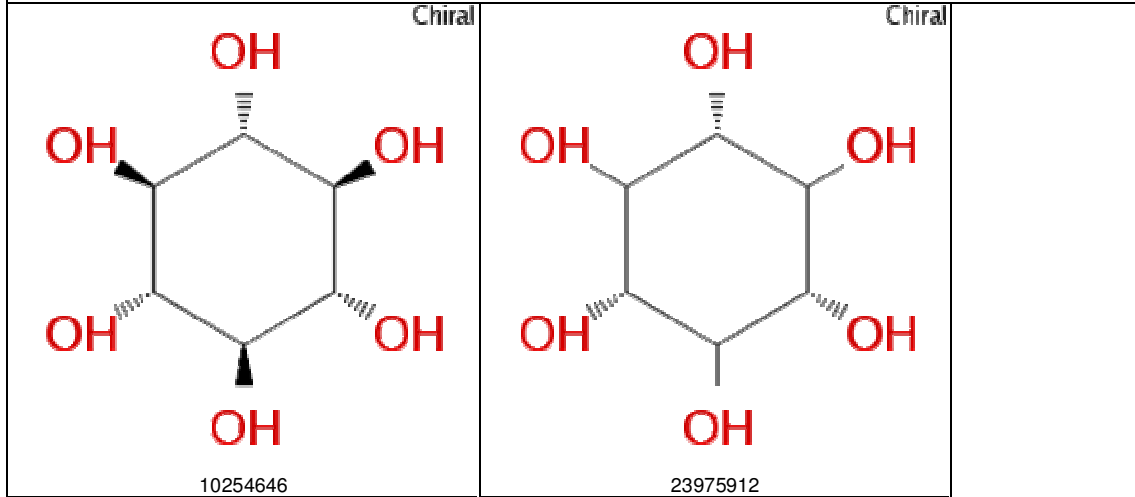

**Name: quinic acid**

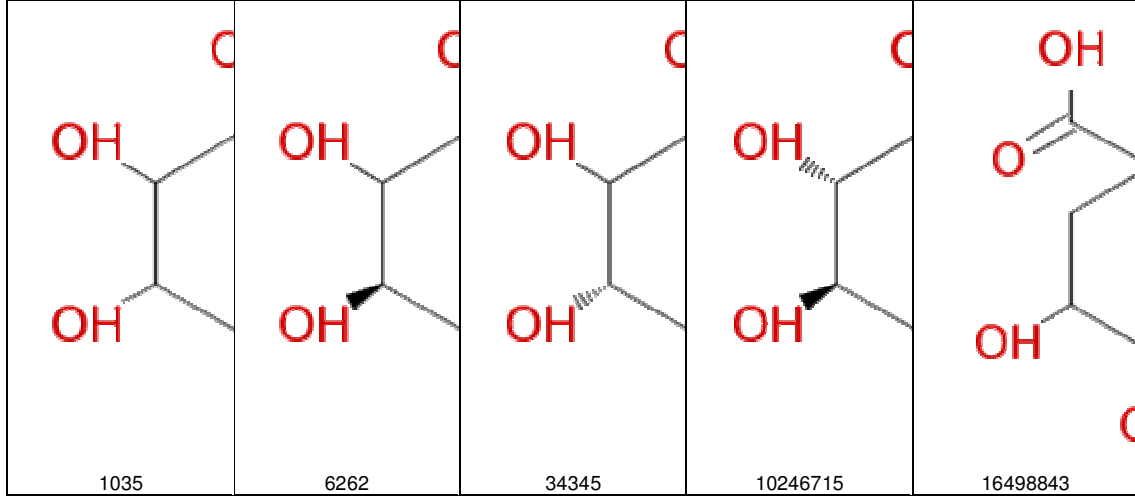

**Name: methylmalonyl-CoA**

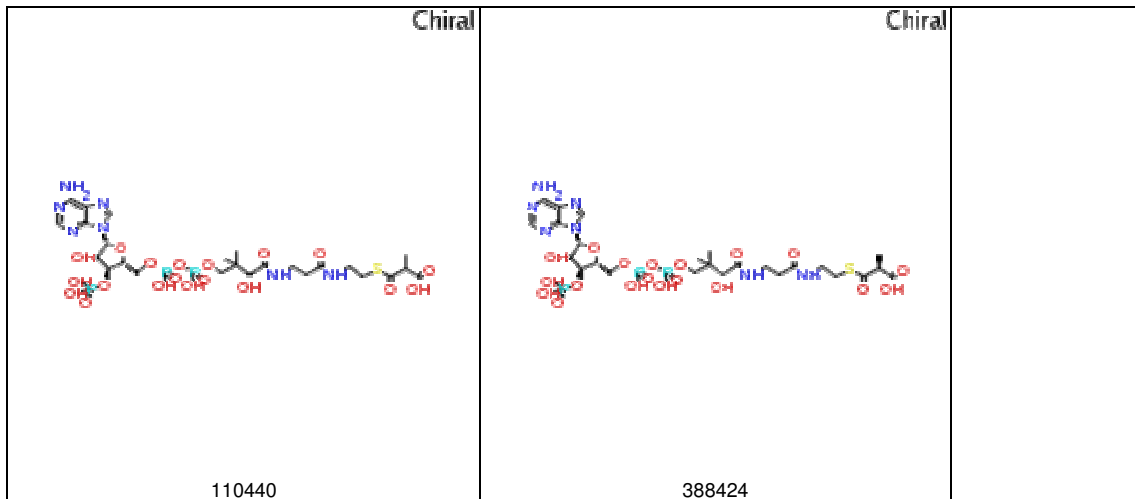

**Name: dCDP**

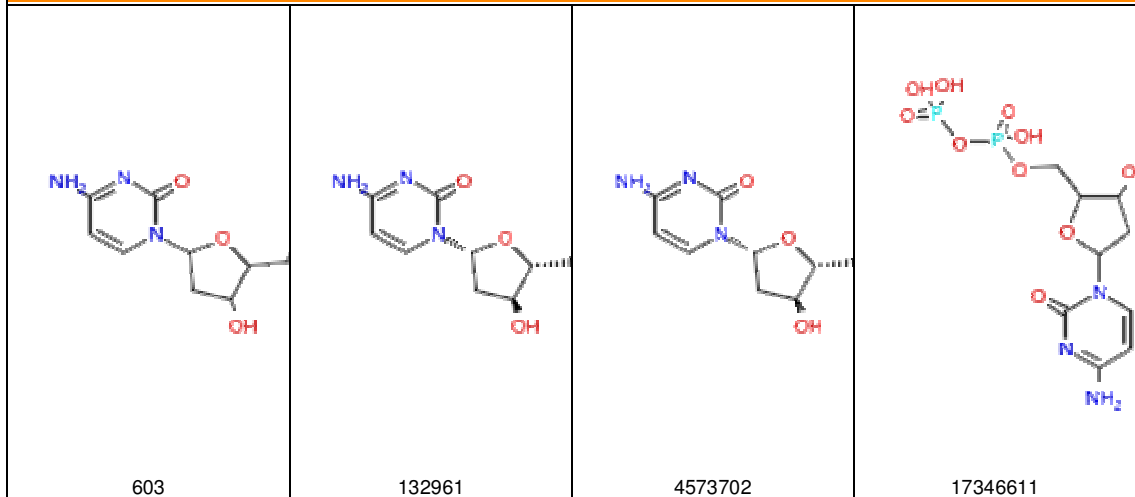

**Name: dGDP**

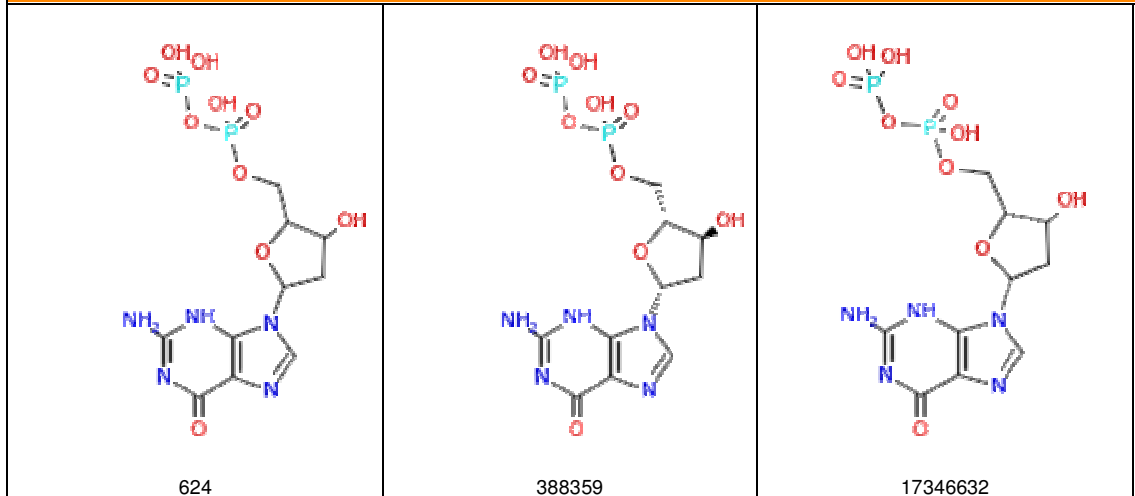

**Name: brefeldin A**



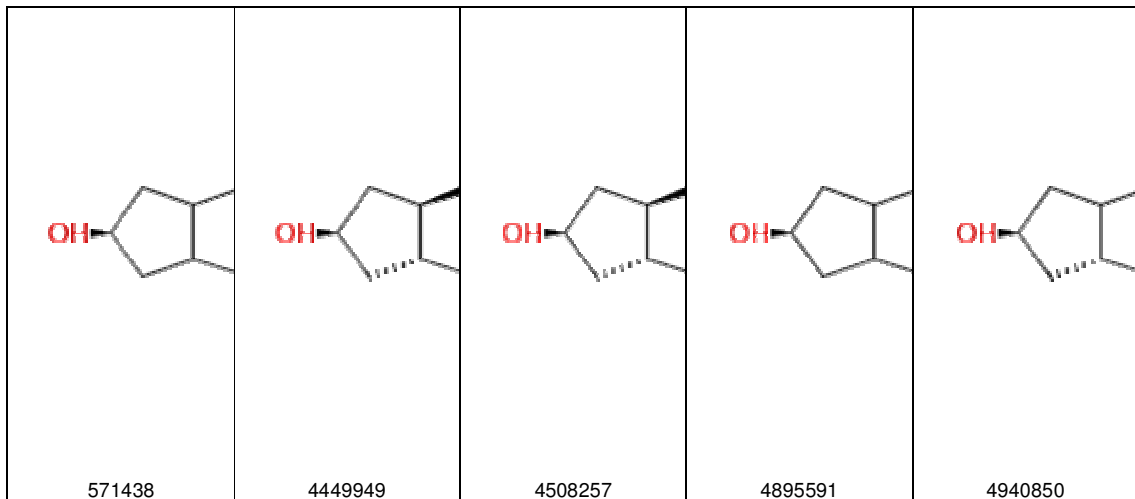

**Name: asparagine tRNA**

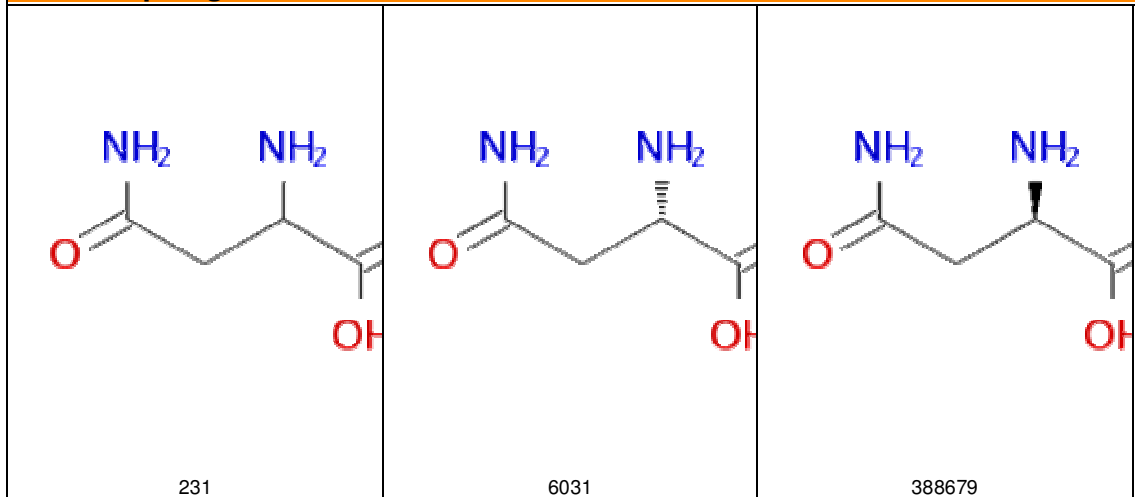

**Name: ketodihydrospingosine**

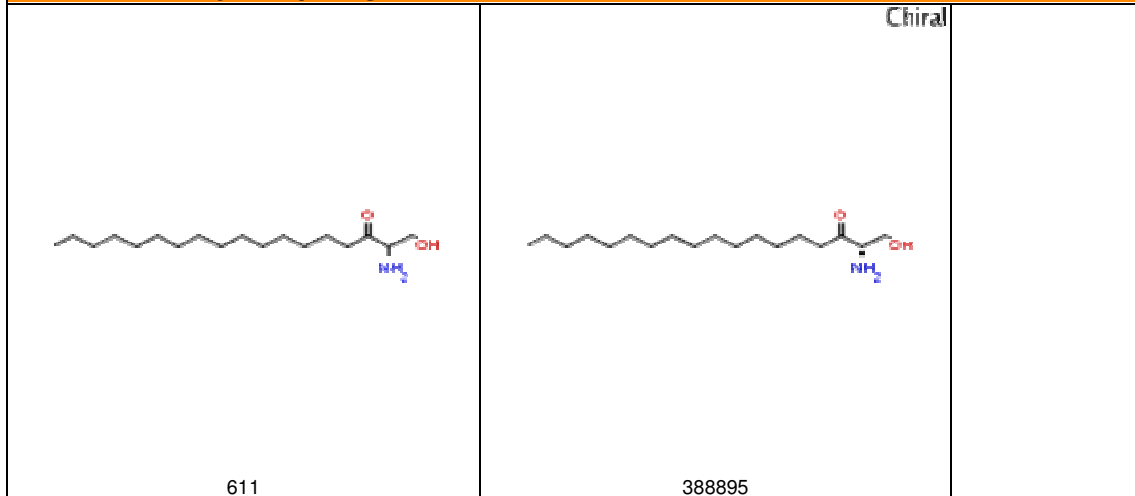

**Name: isofucosterol**

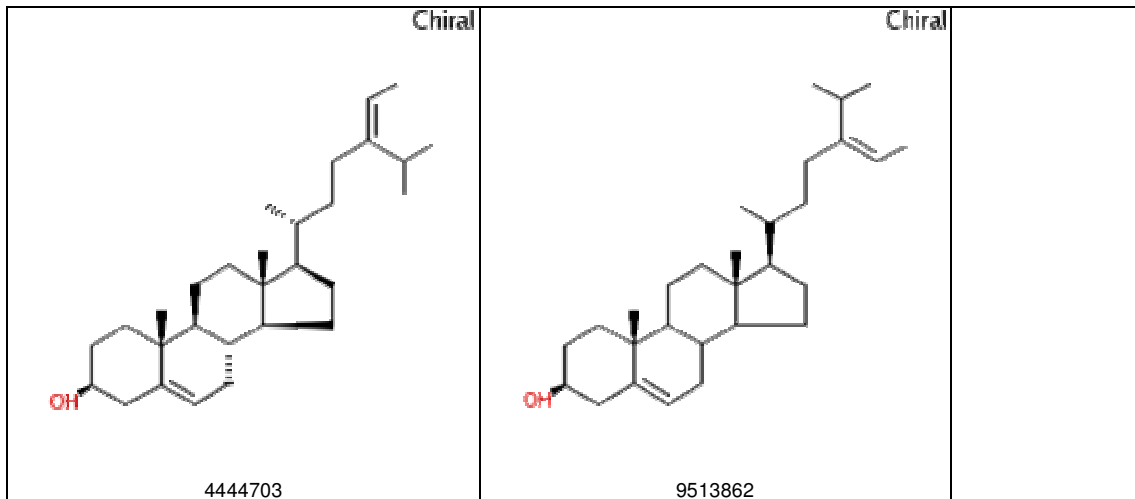

**Name: 5'-UMP**

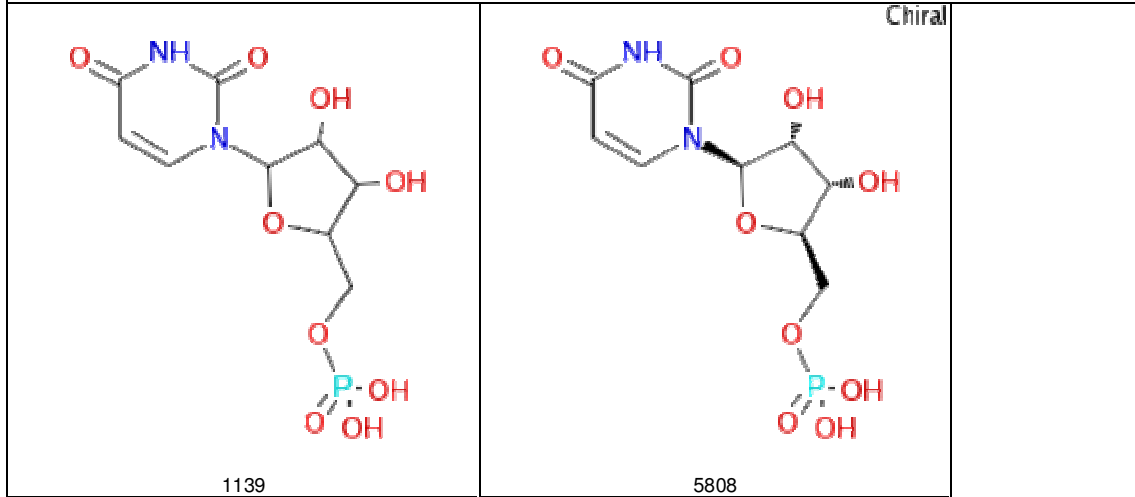

**Name: UDPgalactose**

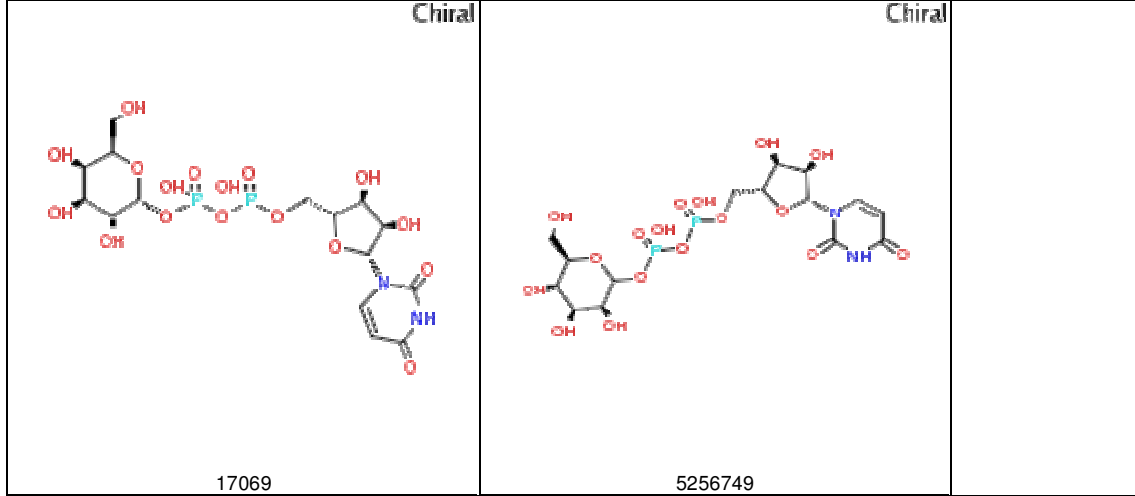

**Name: deoxythymidine**

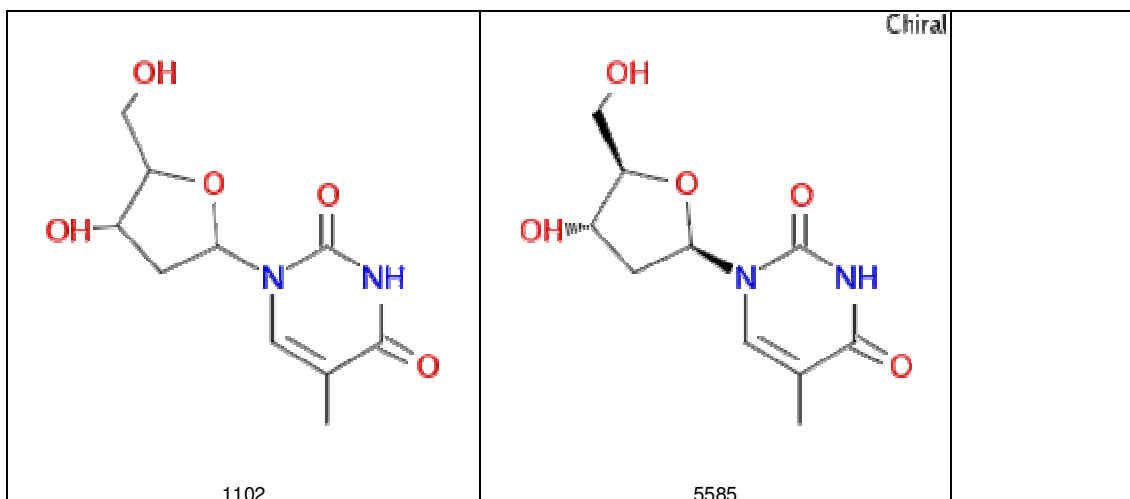

**Name: 5,10-methenyl-THF**

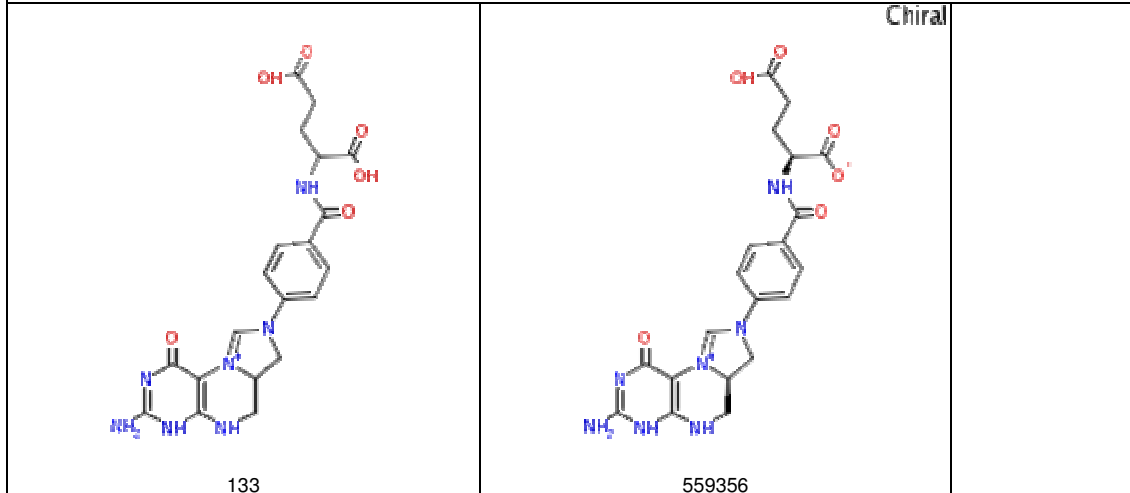

**Name: thioctic acid**

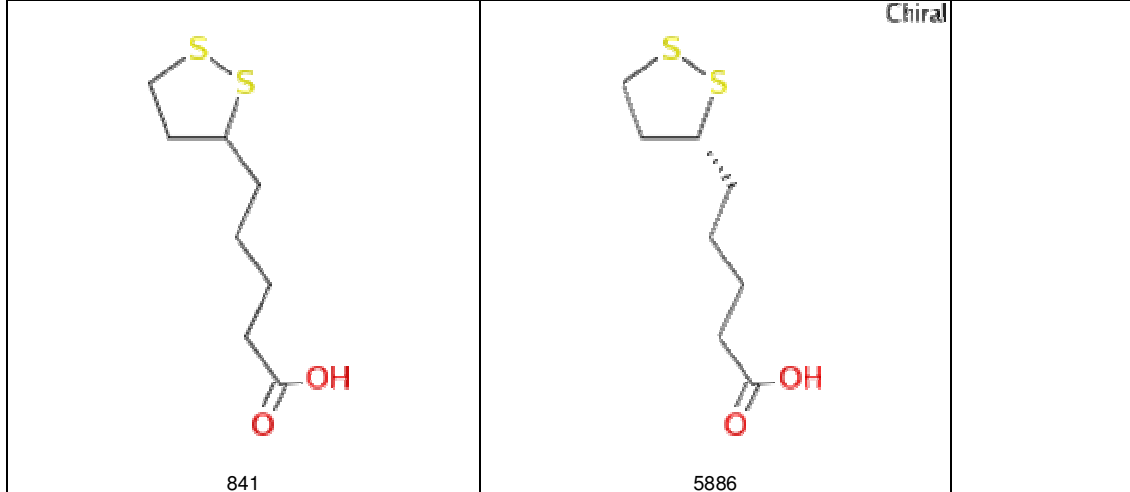

**Name: Tallimustine**

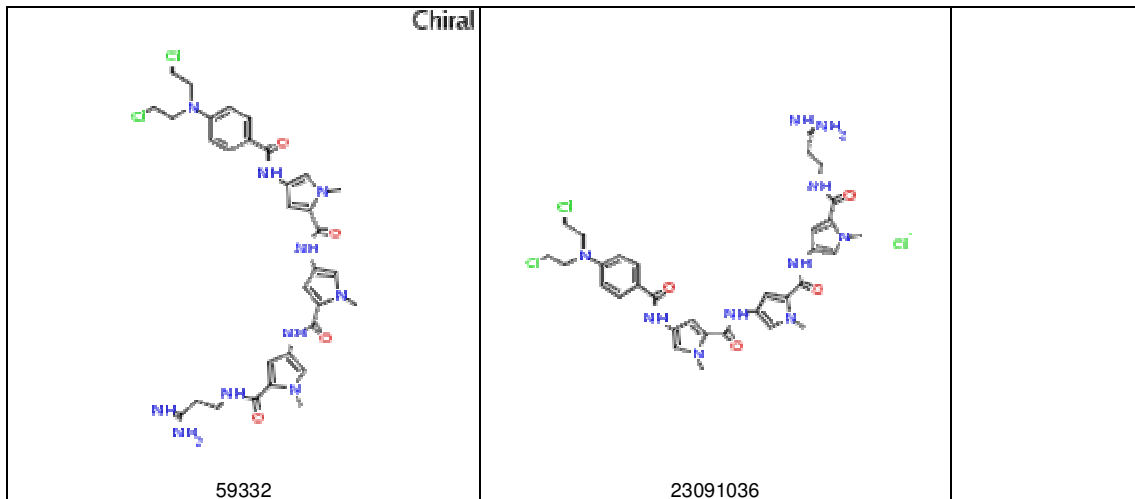

**Name: 2-hydroxyphytanoyl-CoA**

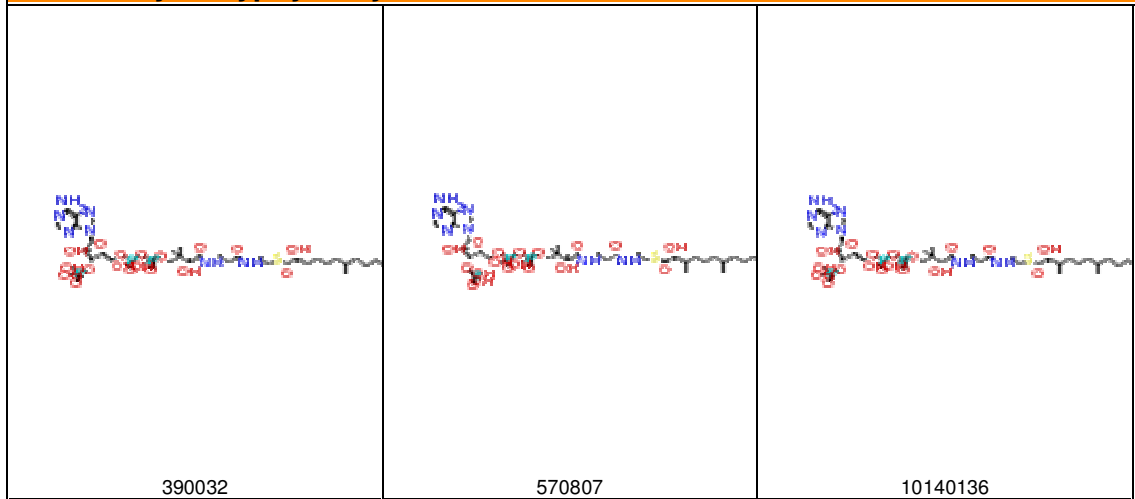

**Name: 4'-phosphopantothenoylcysteine**

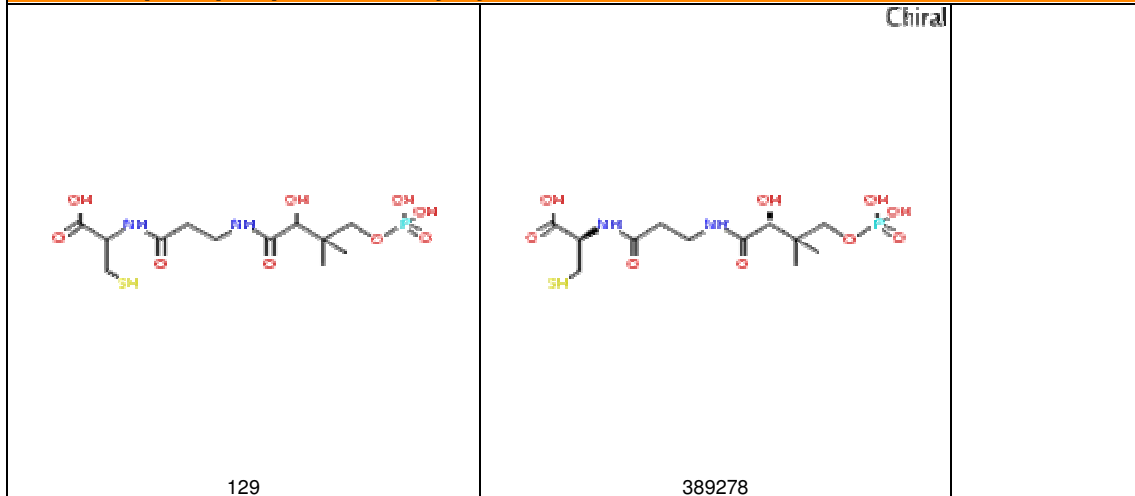

**Name: Bromodeoxyuridine**



**Name: heptadecenoic acid**

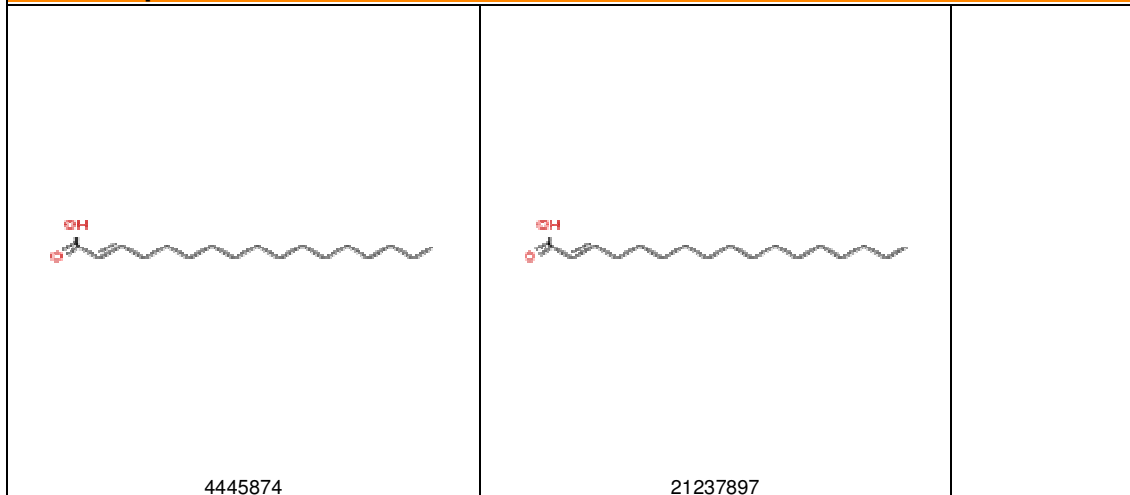

**Name: deoxyguanosine**

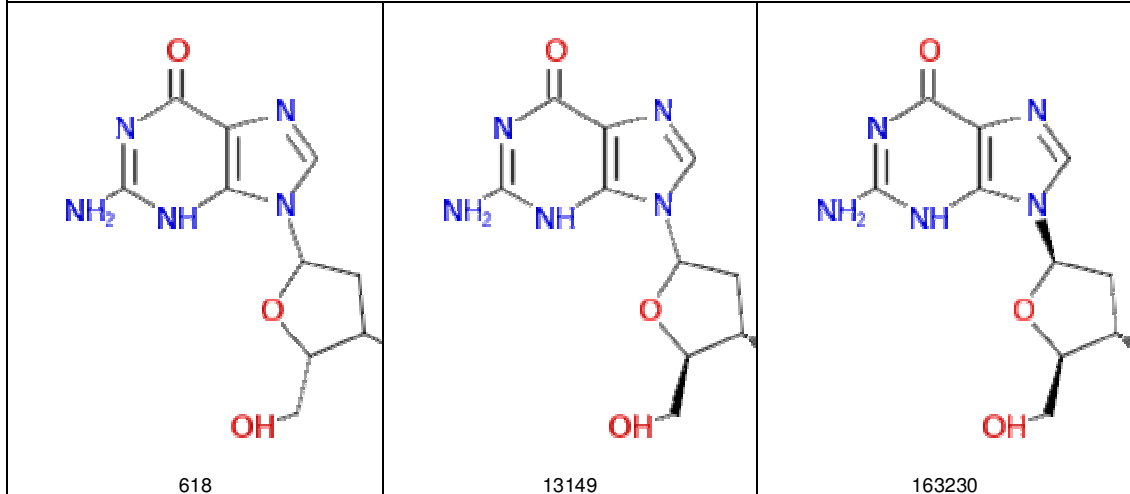

**Name: pentamine**

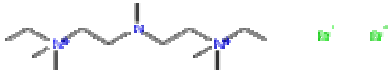

9013

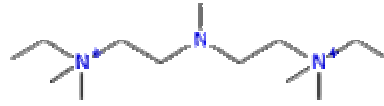

9014

**Name: Okadaic acid**

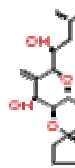

393845

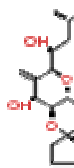

5293007

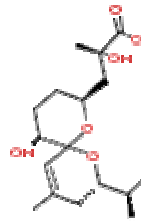

23107732

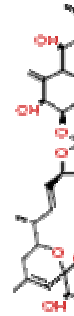

23108780

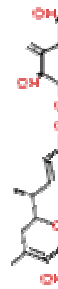

23194535

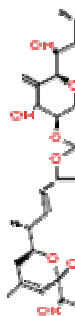

23238937

**Name: adenosine diphosphate**

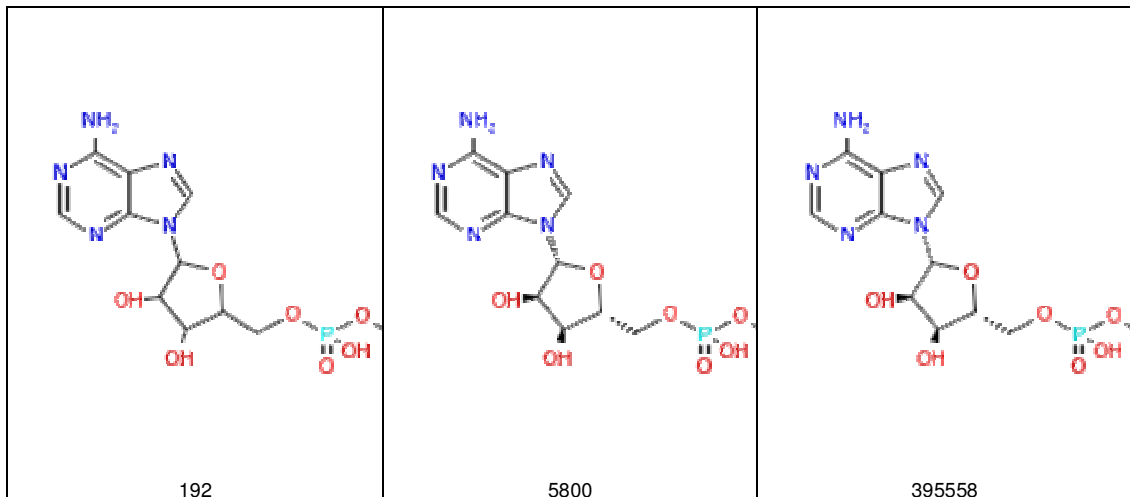

**Name: mannitol-1-phosphate**

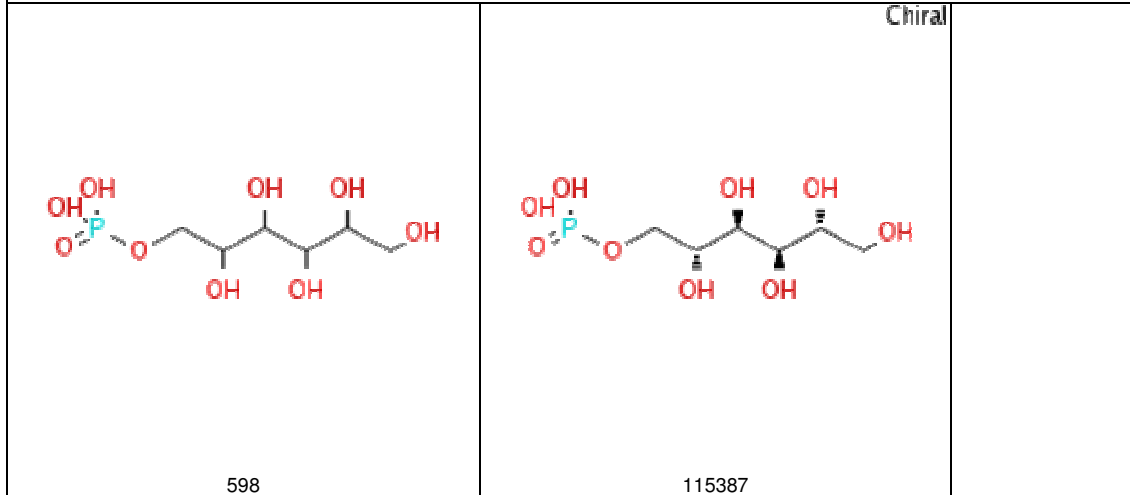

**Name: 5-formyltetrahydrofolic acid**

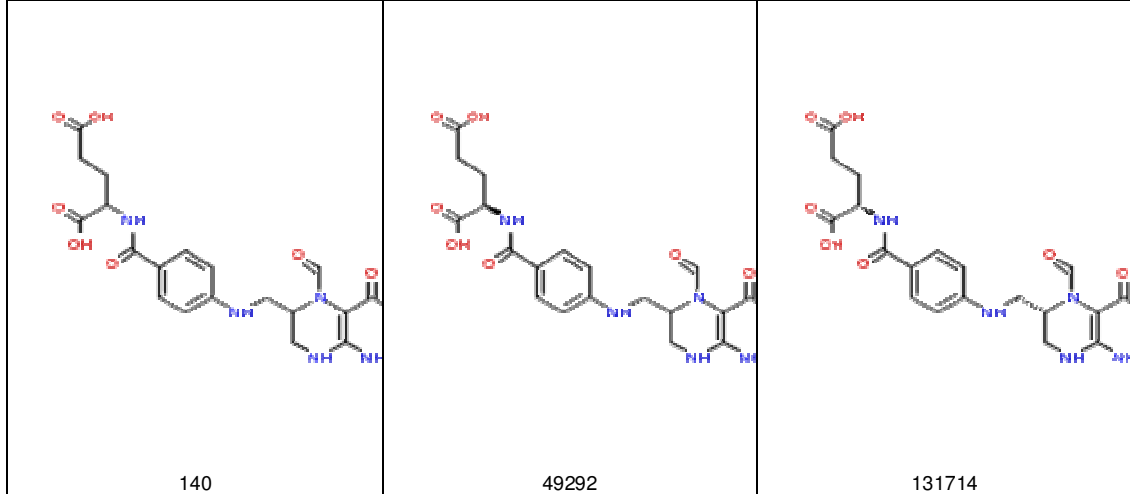

**Name: Valproate**

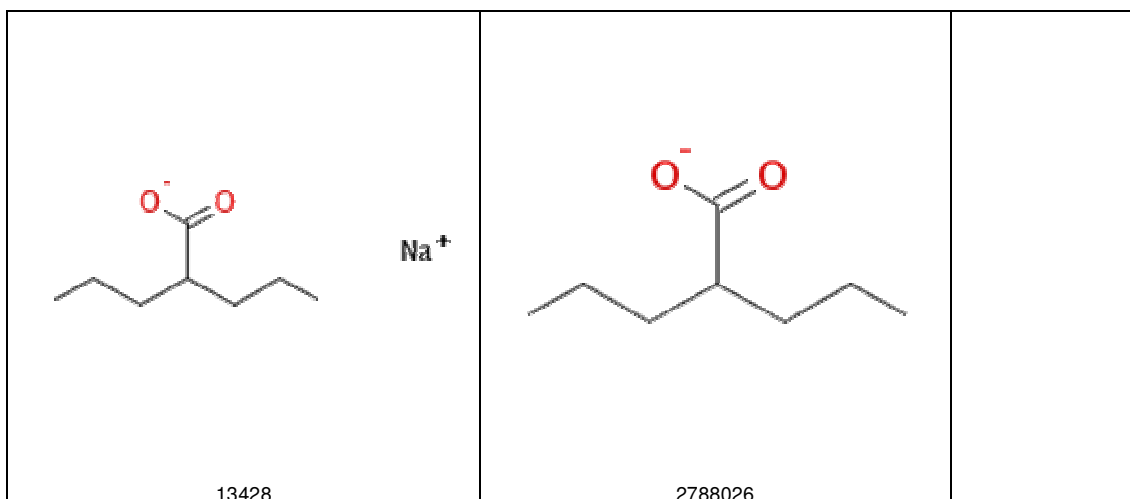

**Name: dehydroascorbate**

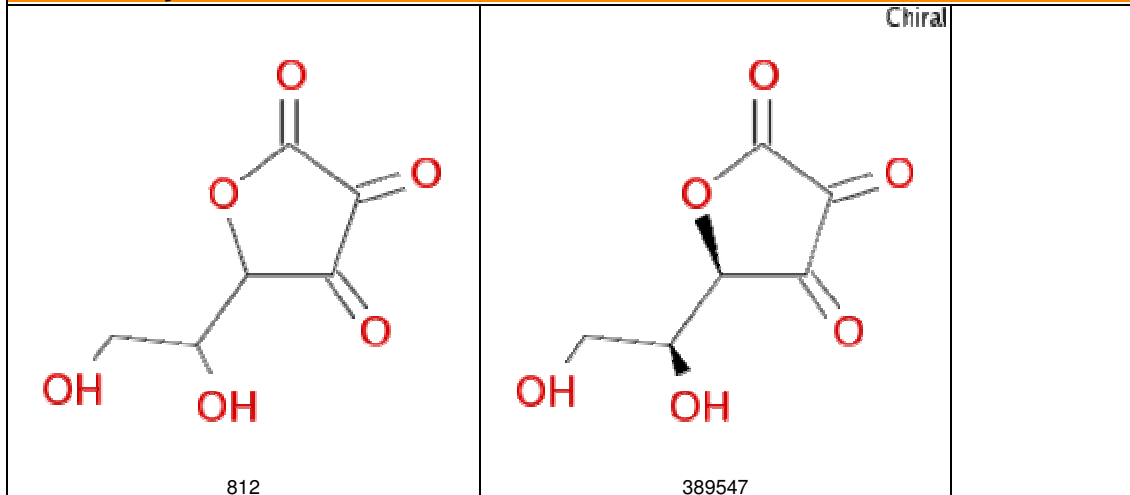

**Name: uridylic acid**

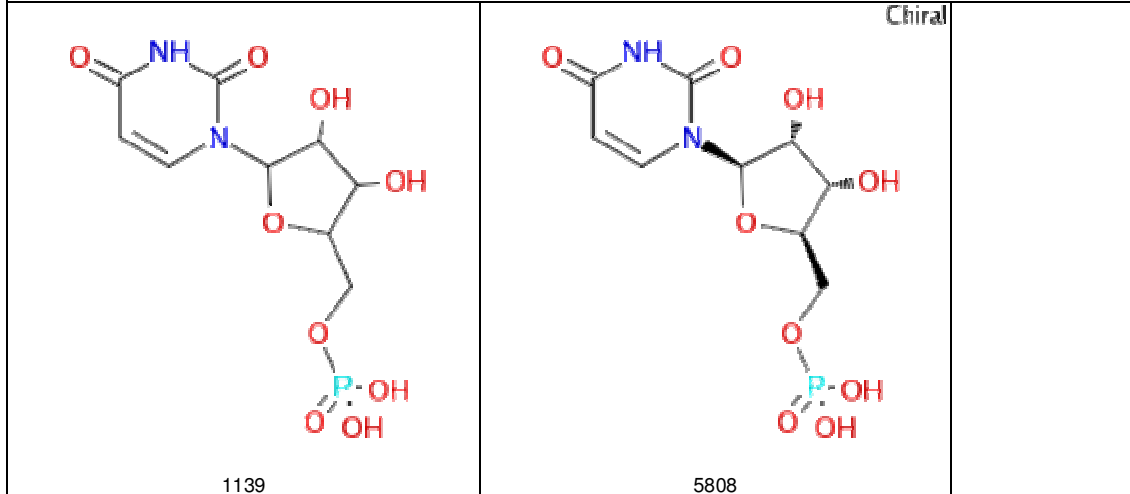

**Name: Celastrol**



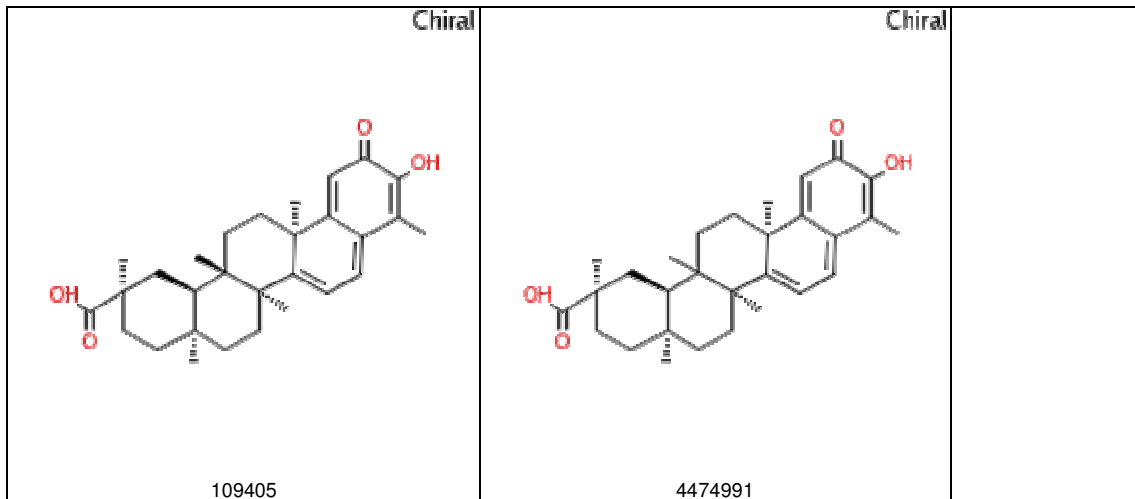

**Name: astaxanthin**

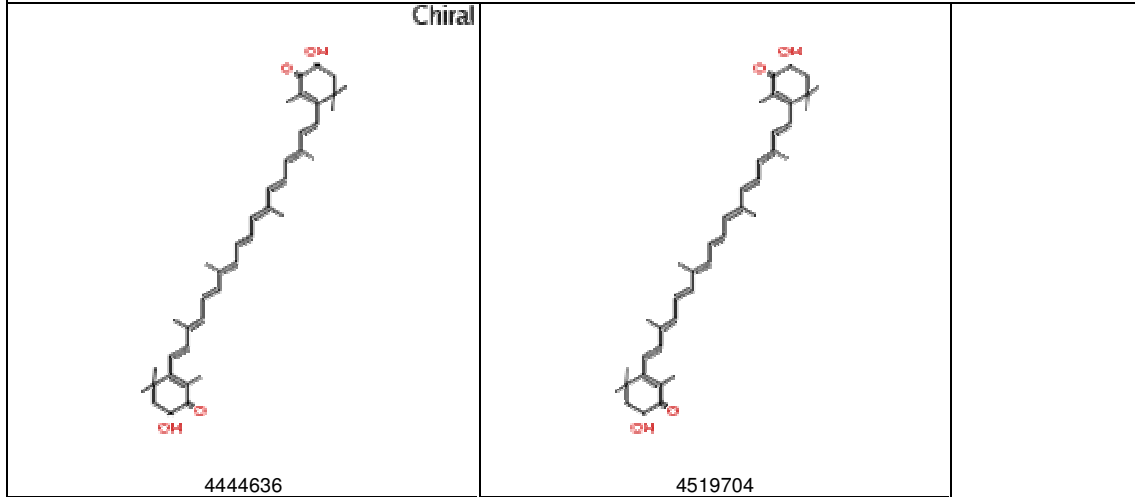

**Name: 5'-dTMP**

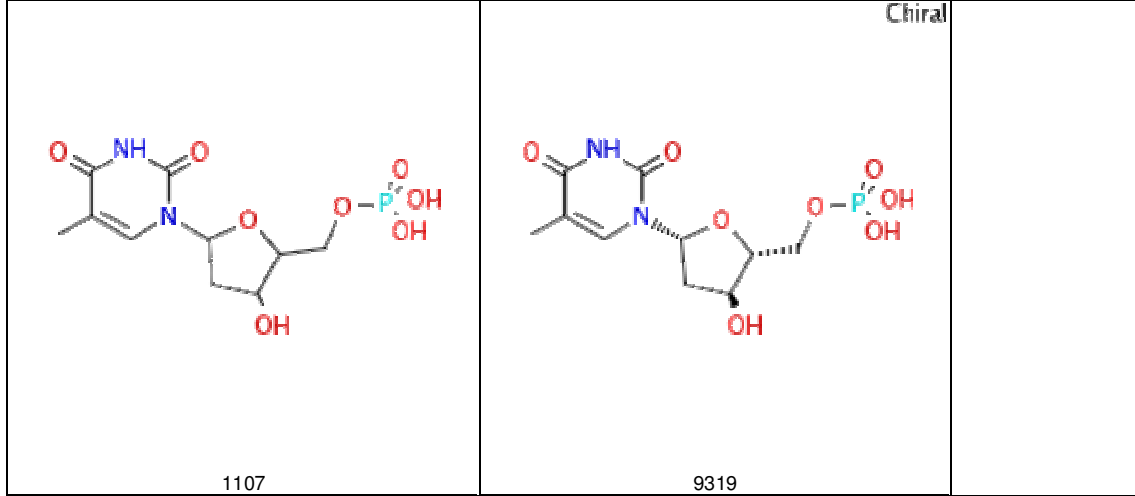

**Name: S-nitroso-N-acetylpenicillamine**

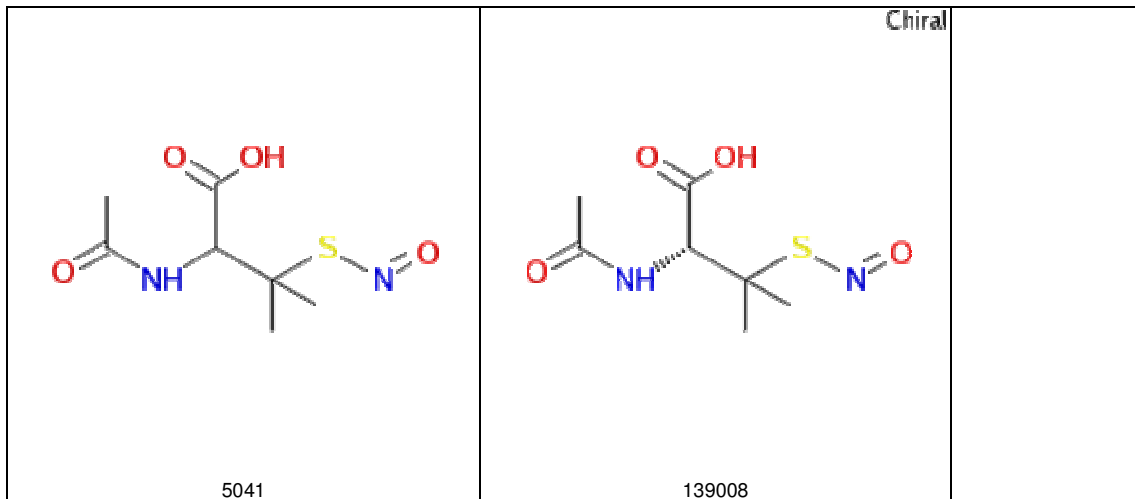

**Name: naringenin**

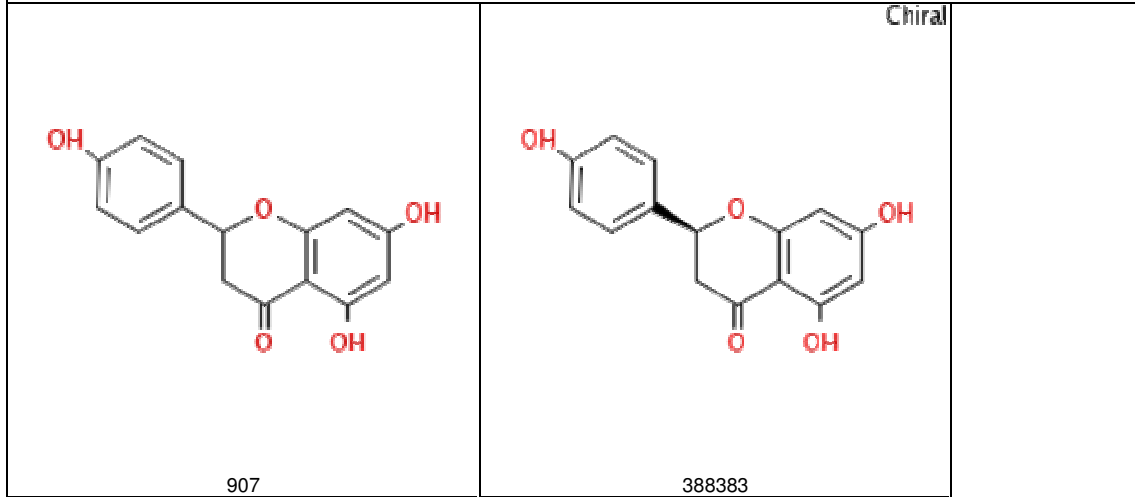

**Name: AdoHcy**

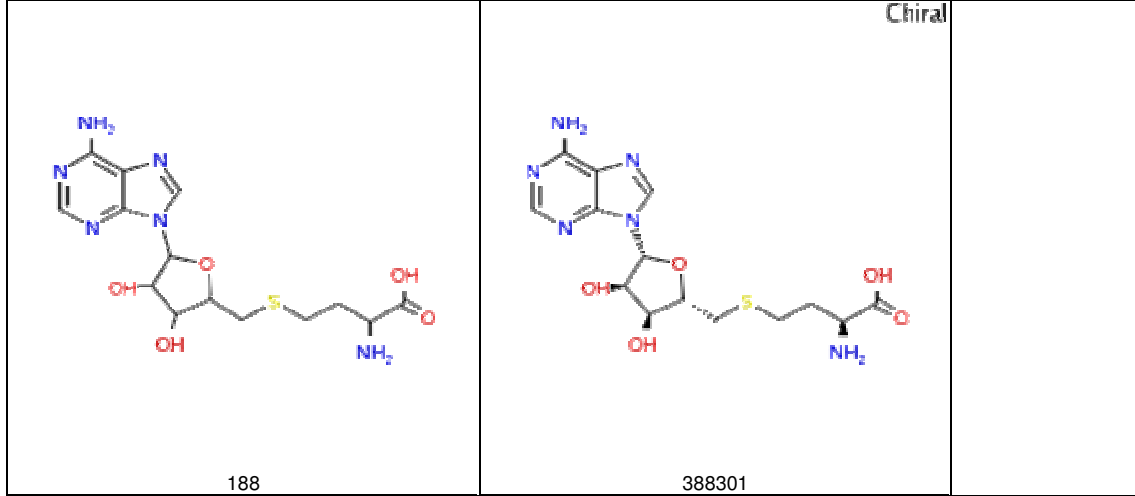

**Name: propionyl-coenzyme A**

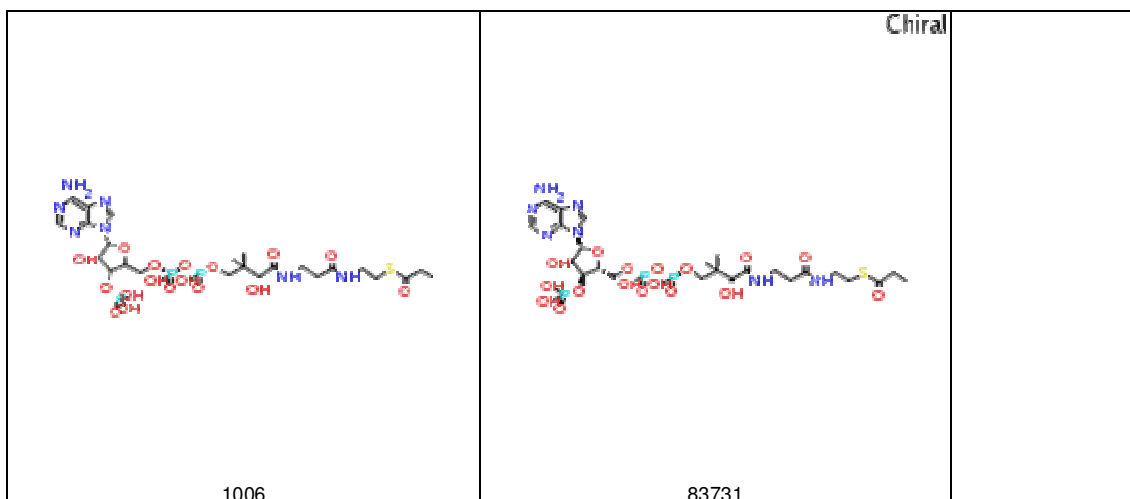

**Name: leukotriene B4**

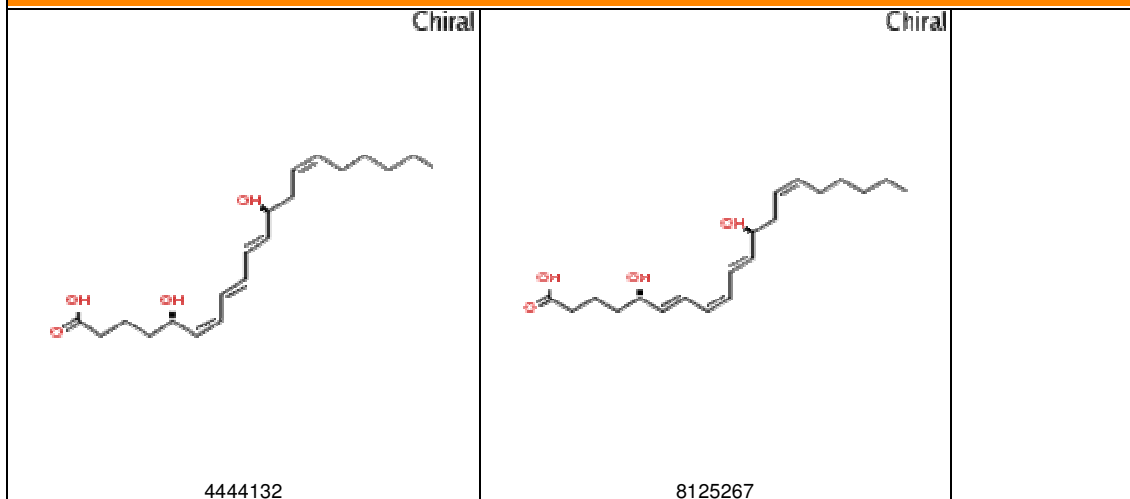

**Name: presqualene diphosphate**

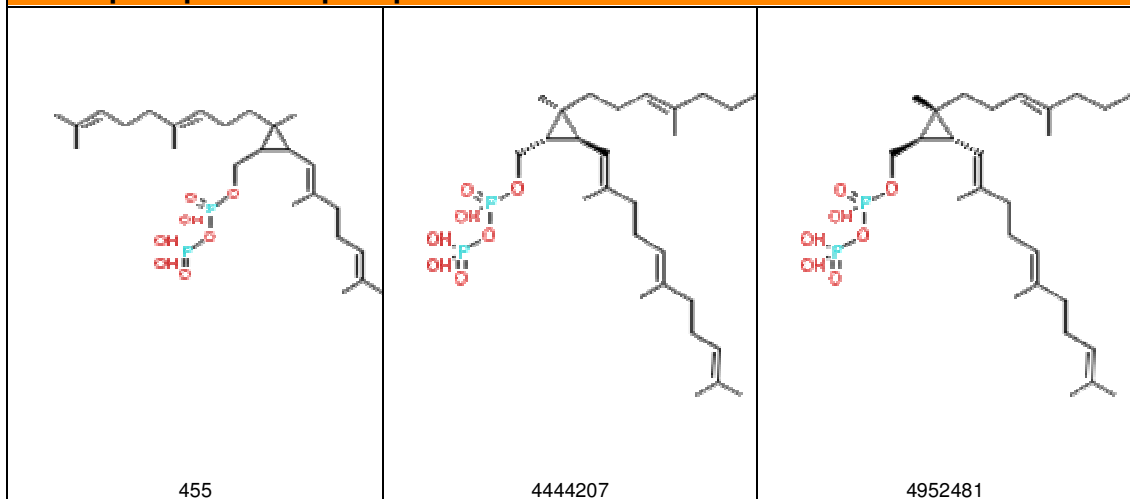

**Name: Abscisic acid**

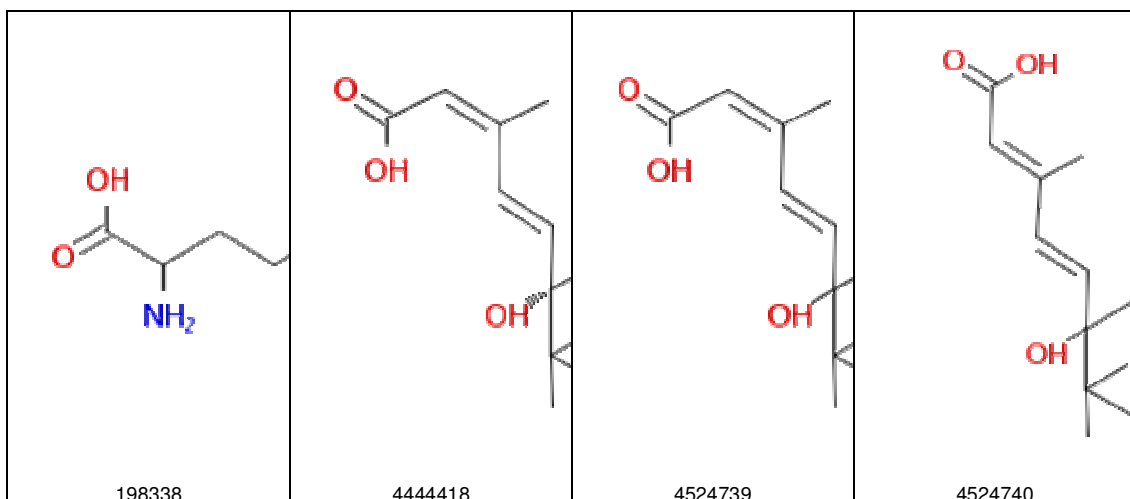

**Name: trehalose-6-phosphate**

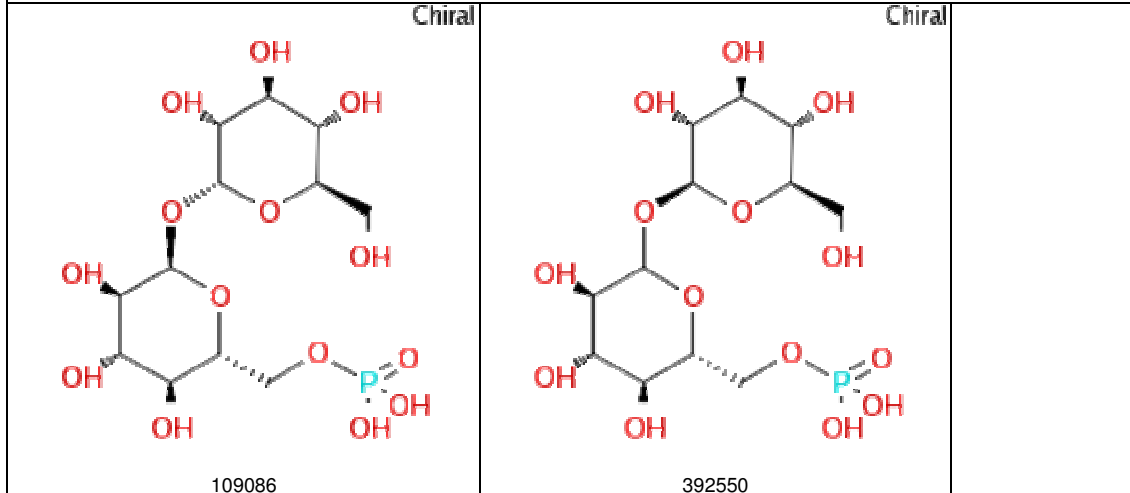

**Name: presqualene pyrophosphate**

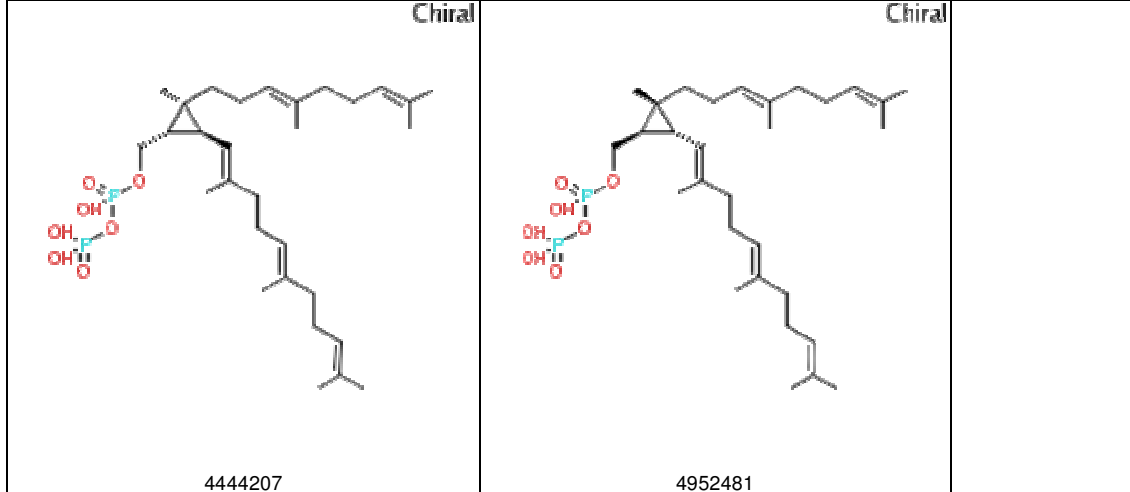

**Name: glucocerebroside**

|                                                                                                     |                                                                                                    |                                                                                                    |                                                                                                     |                                                                                                      |
|-----------------------------------------------------------------------------------------------------|----------------------------------------------------------------------------------------------------|----------------------------------------------------------------------------------------------------|-----------------------------------------------------------------------------------------------------|------------------------------------------------------------------------------------------------------|
| 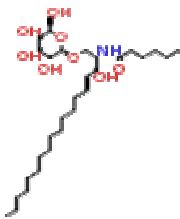 <p>4977045</p>    |  <p>8548528</p>   |  <p>10132611</p>  |  <p>16744954</p>  |  <p>16744955</p>  |
|  <p>16744956</p>  |  <p>16744958</p> |  <p>16744960</p> |  <p>16744961</p> |  <p>16744962</p> |
|  <p>16744964</p> |                                                                                                    |                                                                                                    |                                                                                                     |                                                                                                      |
| <p><b>Name: chalcone</b></p>                                                                        |                                                                                                    |                                                                                                    |                                                                                                     |                                                                                                      |

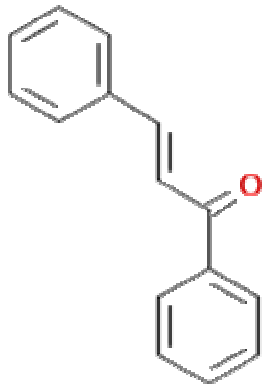

6921

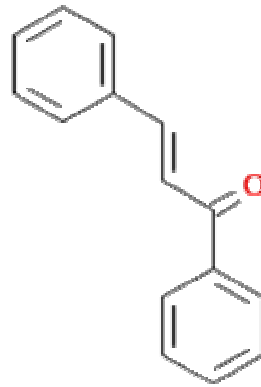

553346

**Name: vitamin D2**

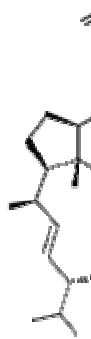

4444351

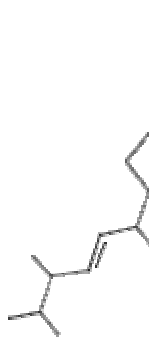

4474626

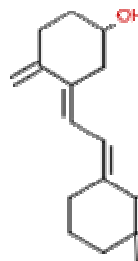

4510152

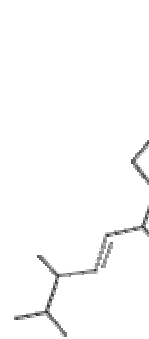

4512241

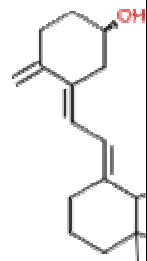

4937723

**Name: deoxythymidylate**

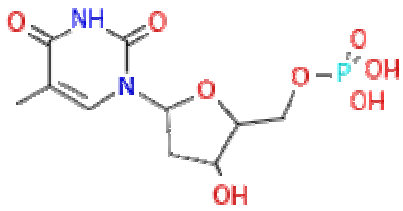

1107

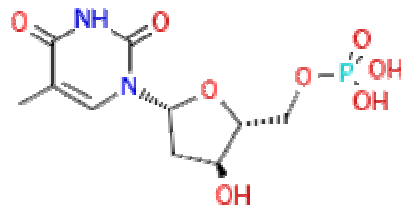

9319

Chiral

**Name: cinnamate**

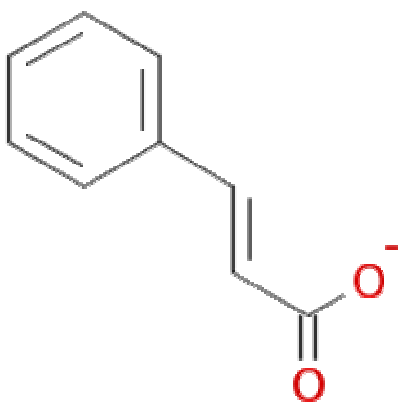

3142588

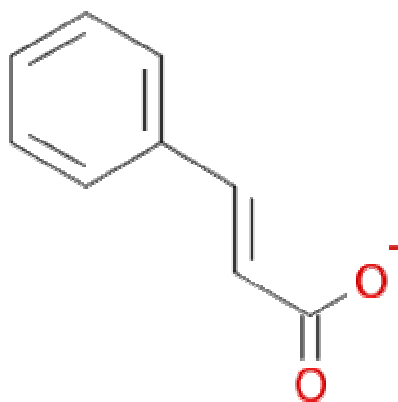

4762929

**Name: stilbamidine**

Chiral

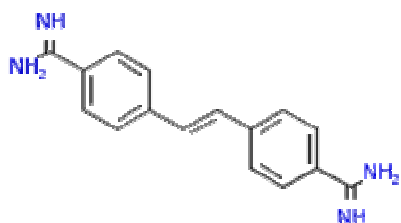

8480

Chiral

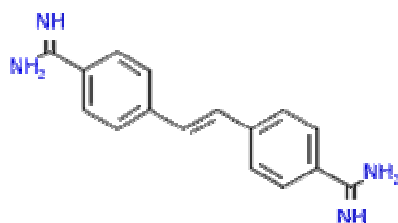

4508738

**Name: gamma-tocopherol**

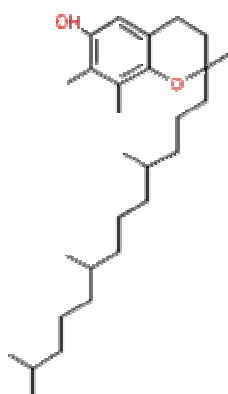

14266

Chiral

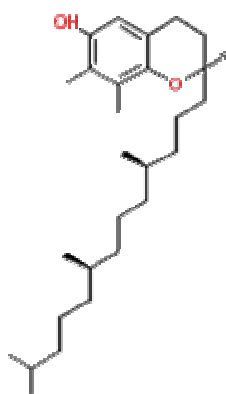

83708

**Name: air**

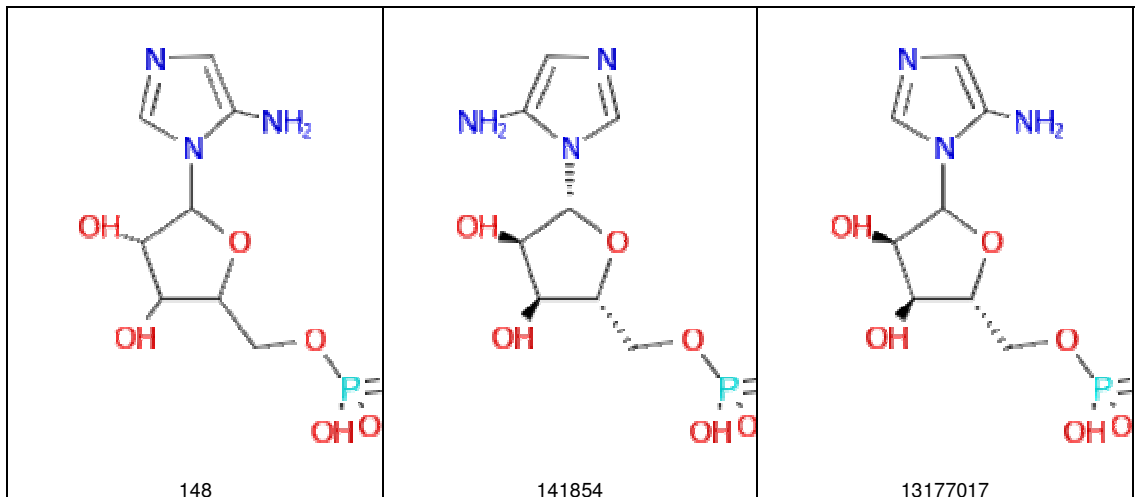

**Name: ibogaine**

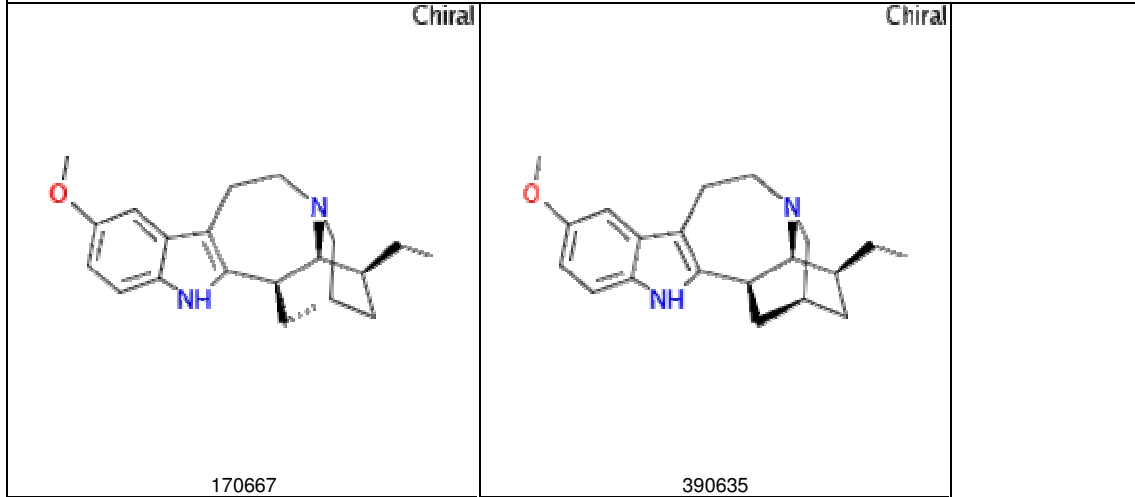

**Name: mannose-6-phosphate**

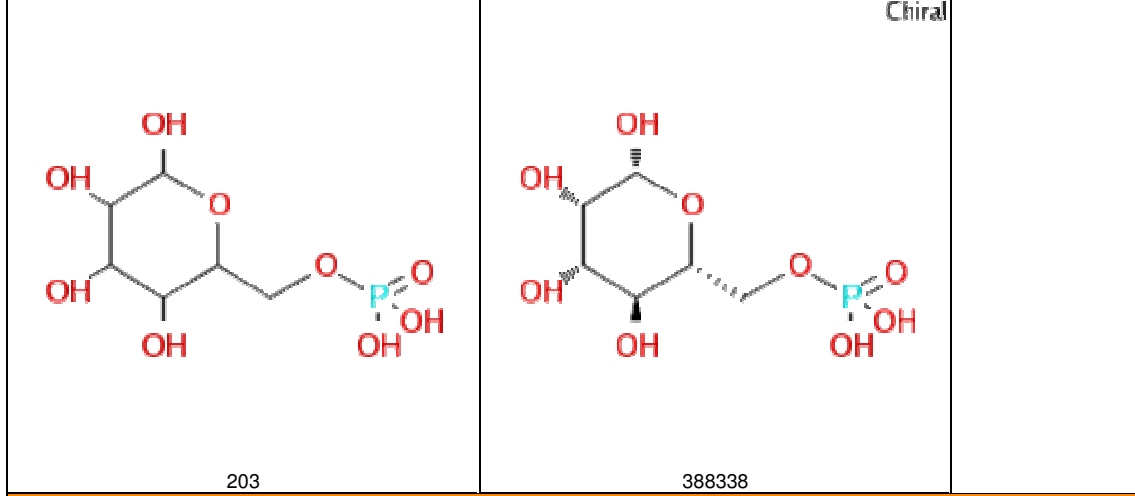

**Name: vitamin B2**



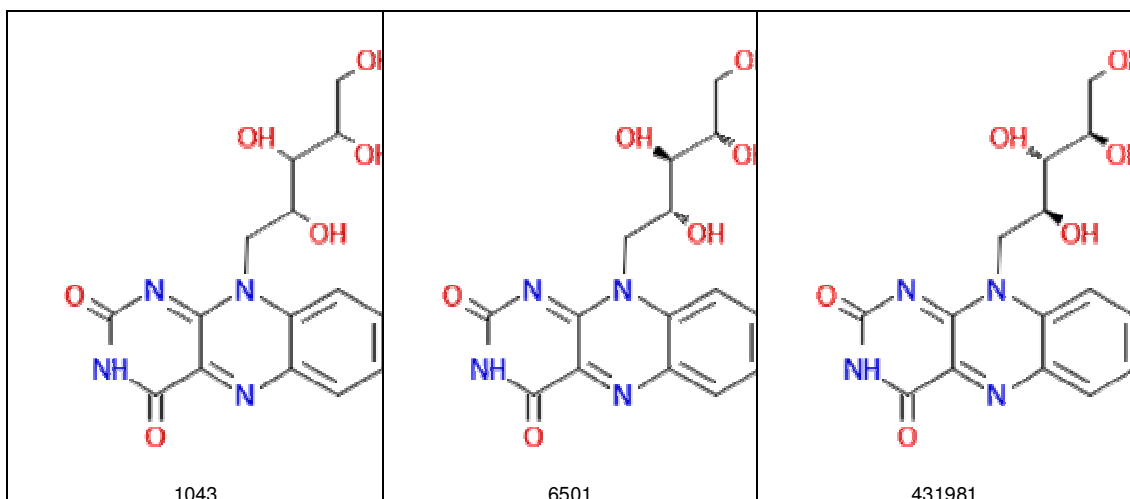

**Name: isosorbide dinitrate**

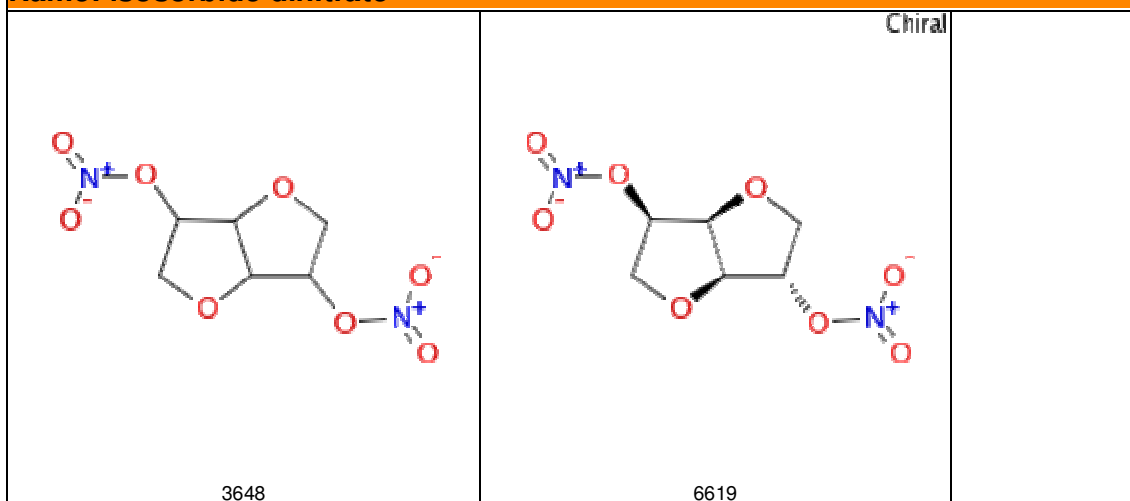

**Name: ryanodine**

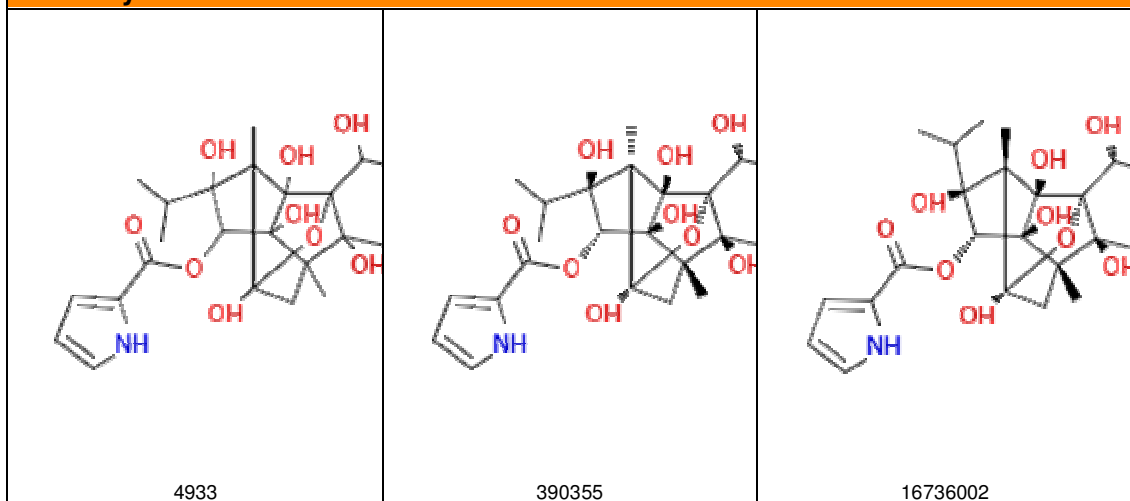

**Name: pantetheine**

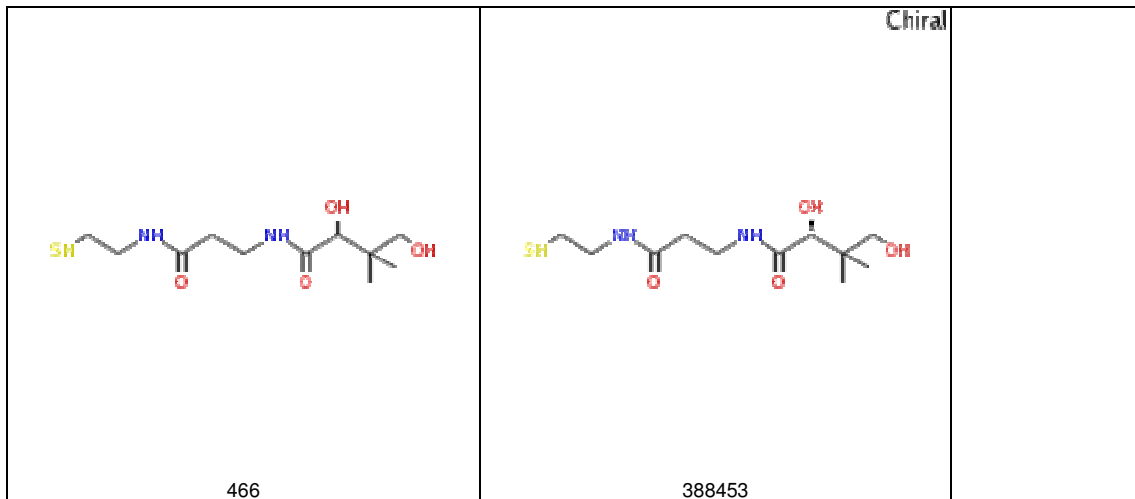

**Name: inositol phosphosphingolipids**

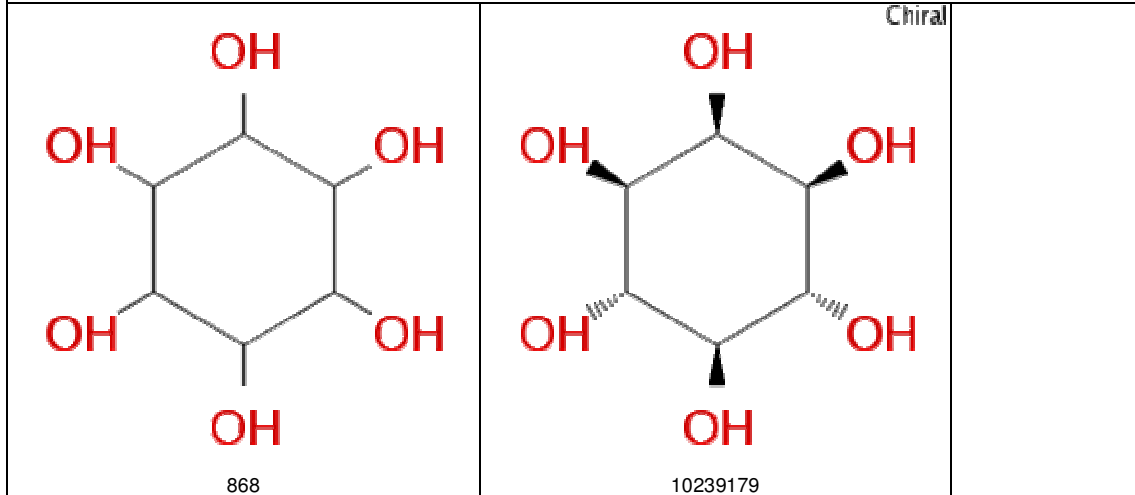

**Name: aflatoxin B1**

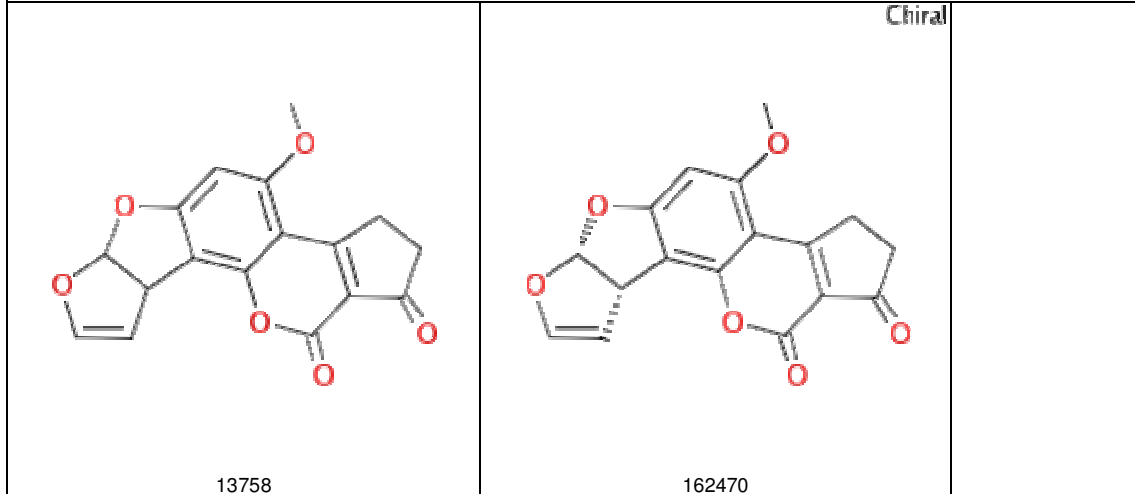

**Name: Arachidonyl-CoA**



**Name: L-gulonono-1,4-lactone**

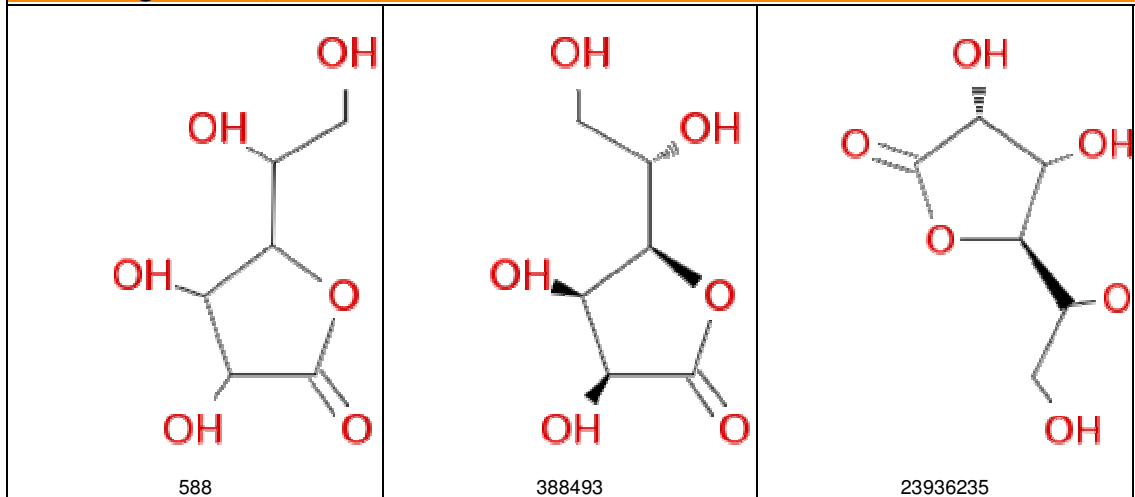

**Name: cinnamic aldehyde**

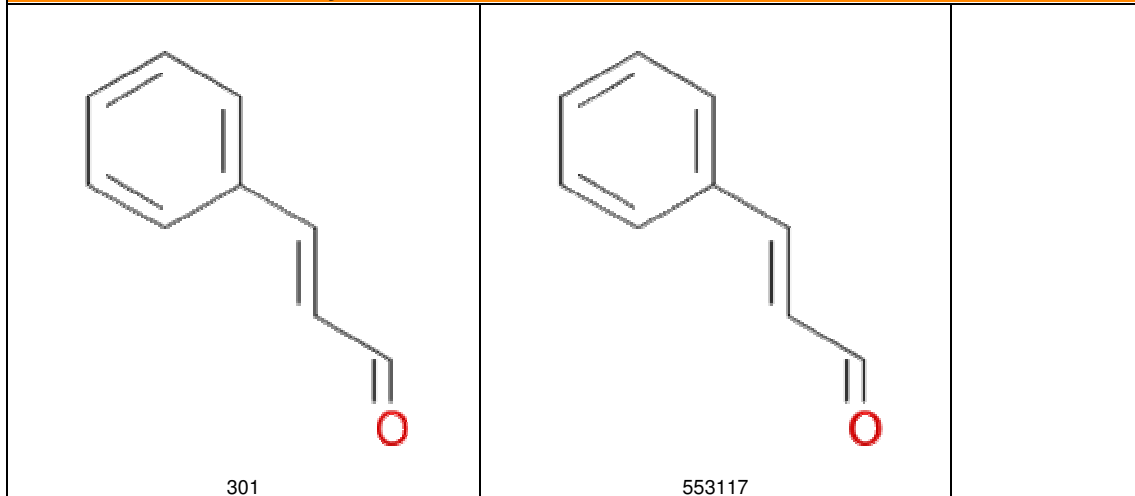

**Name: 3'-phosphoadenosine-5'-phosphosulfate**

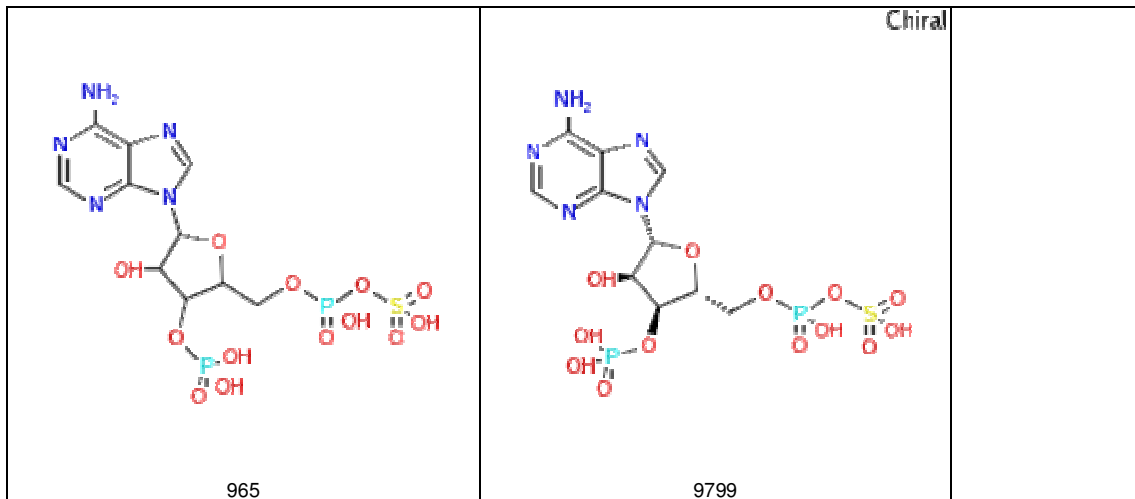

**Name: ubiquinone-6**

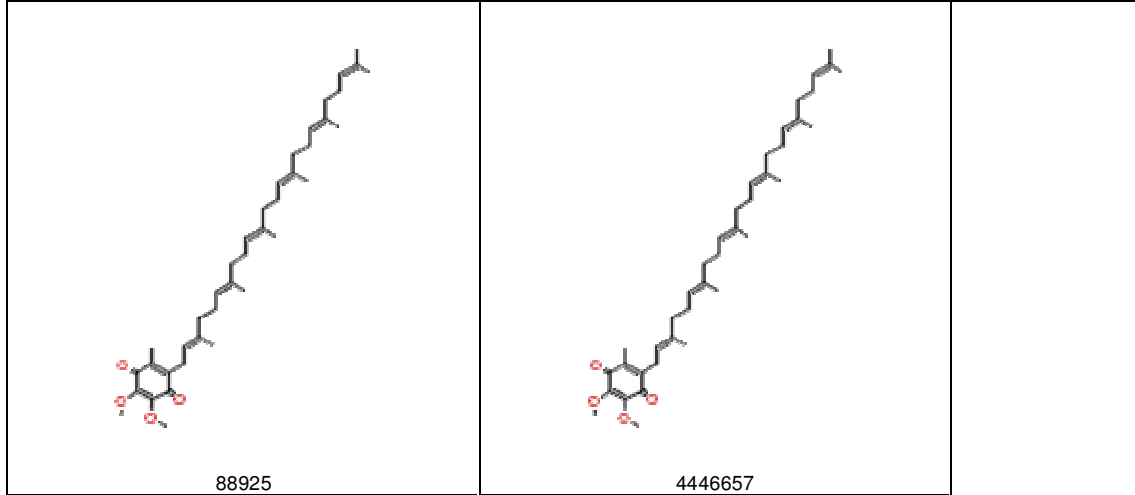

**Name: L-galactono-1,4-lactone**

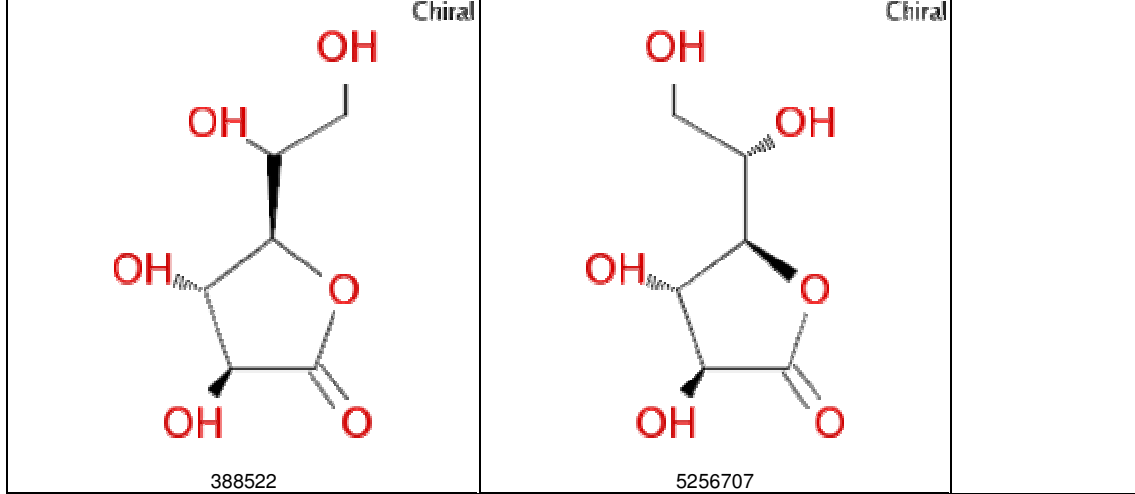

**Name: D-raffinose**

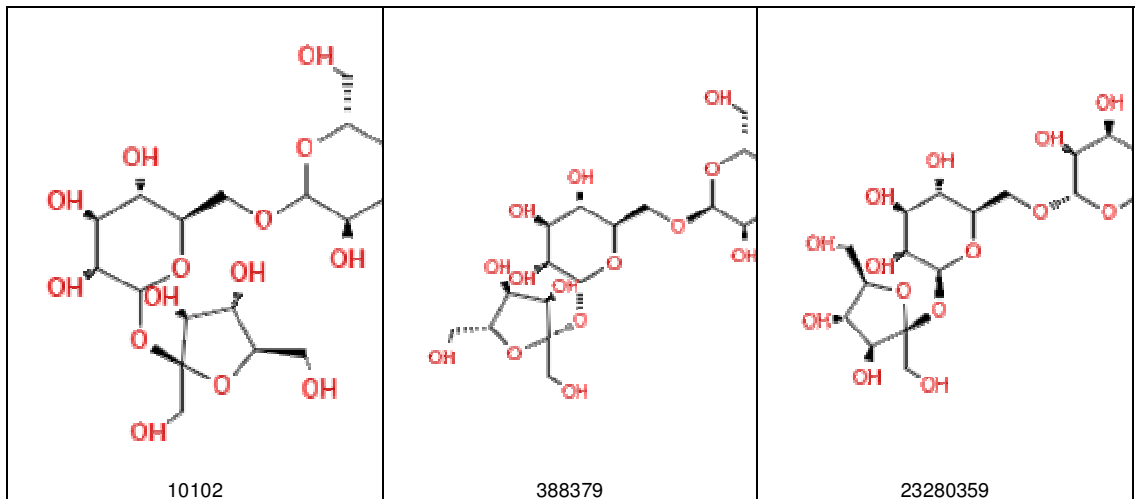

**Name: 11-deoxycortisol**

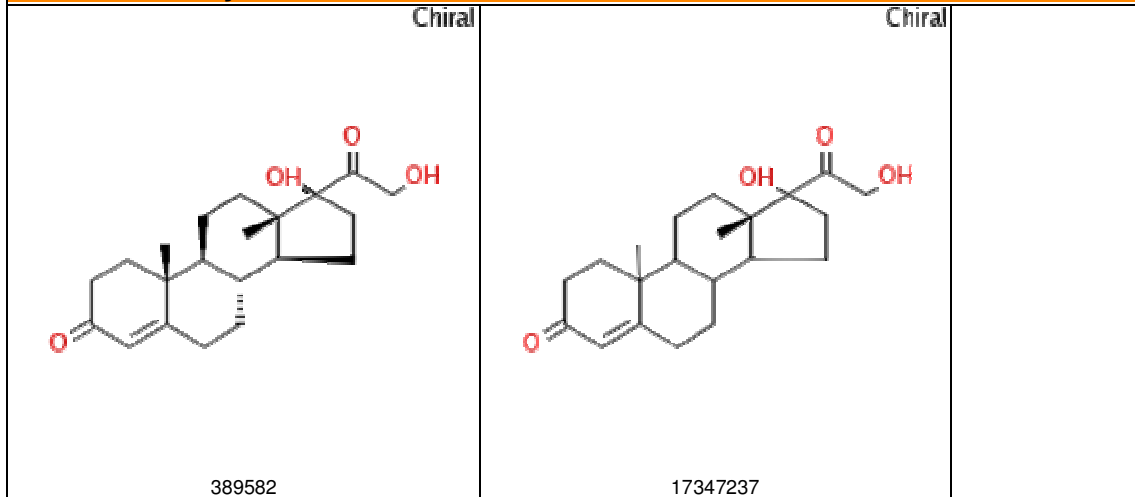

**Name: 17beta-estradiol**

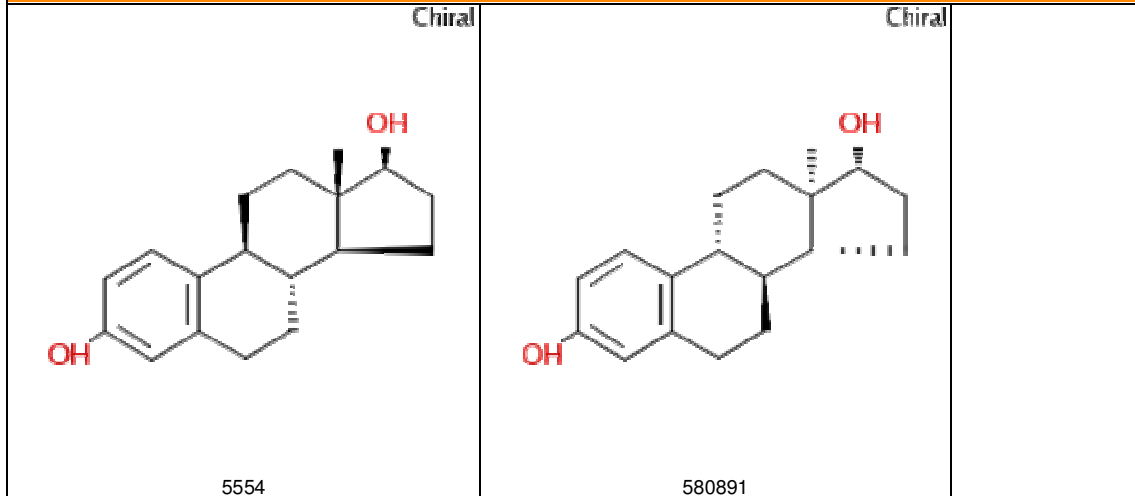

**Name: dulcitol**

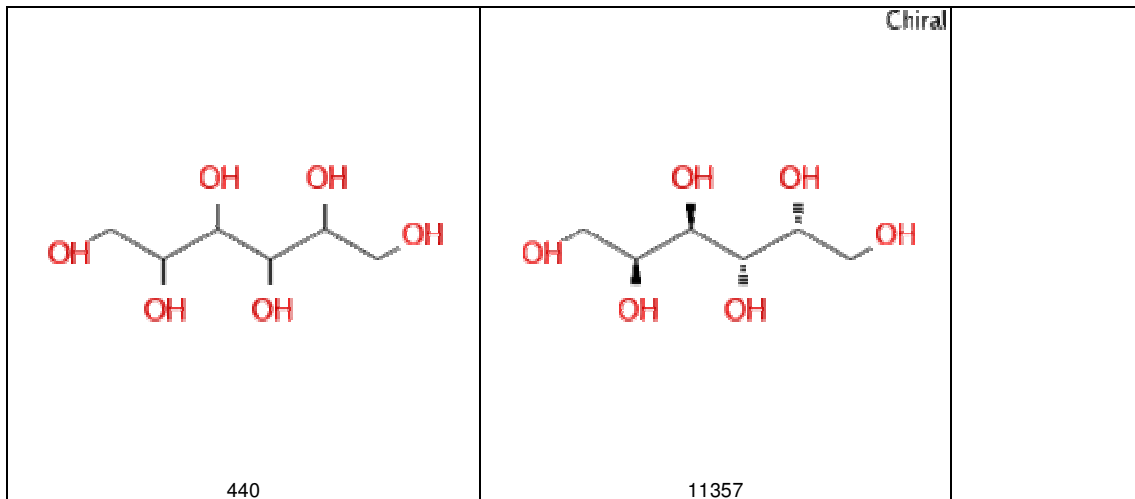

**Name: 1-kestose**

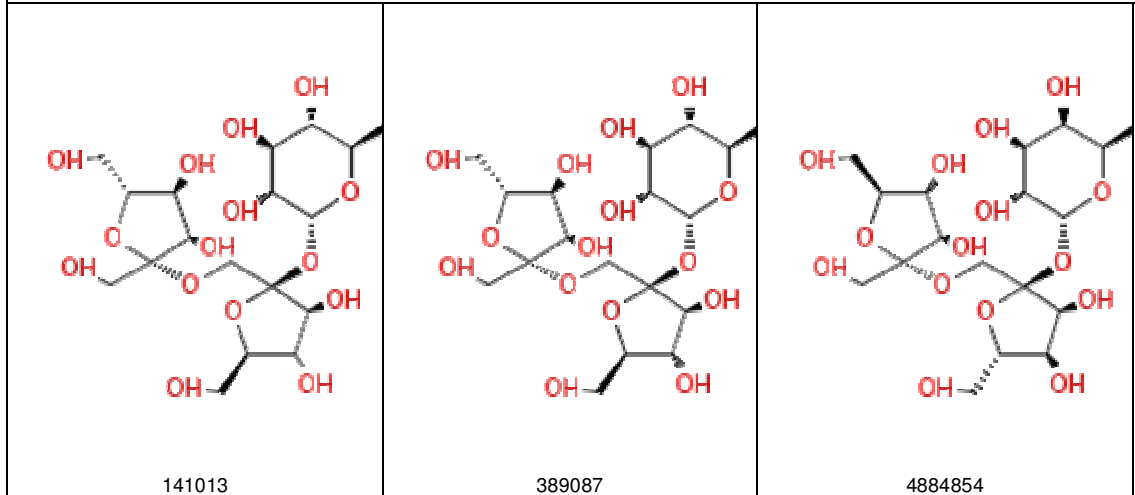

**Name: tyrosine tRNAs**

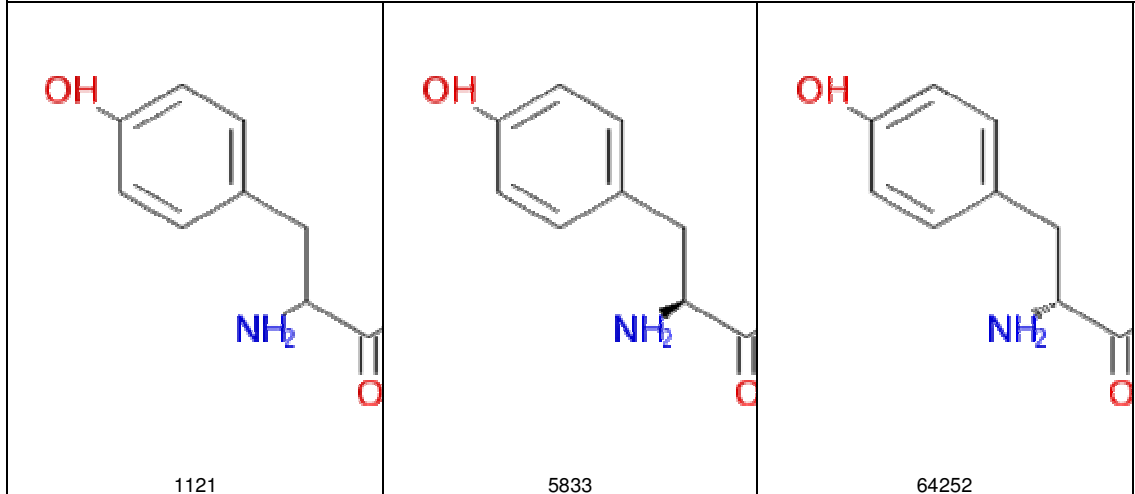

**Name: orotidine-5'-phosphate**

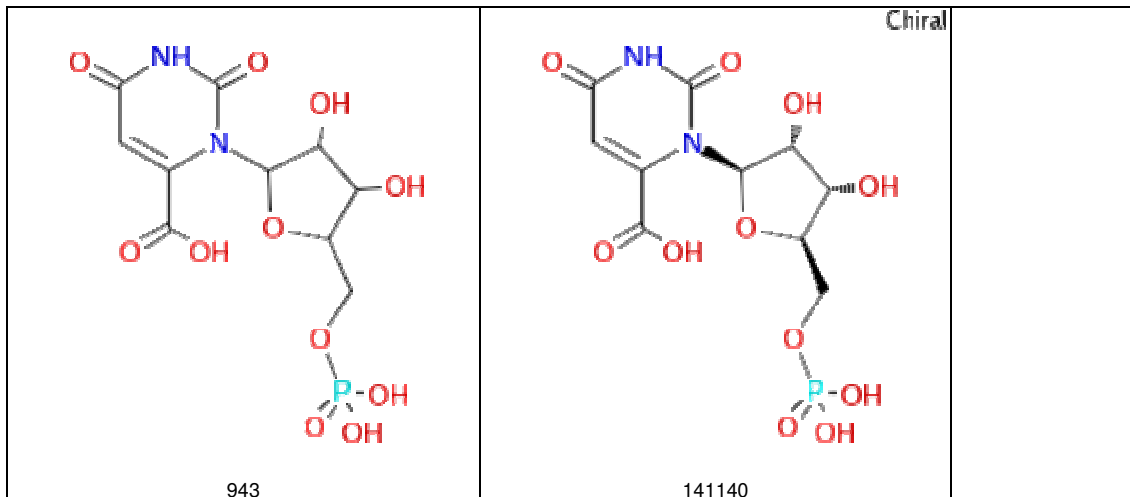

**Name: acetoacetyl coenzyme A**

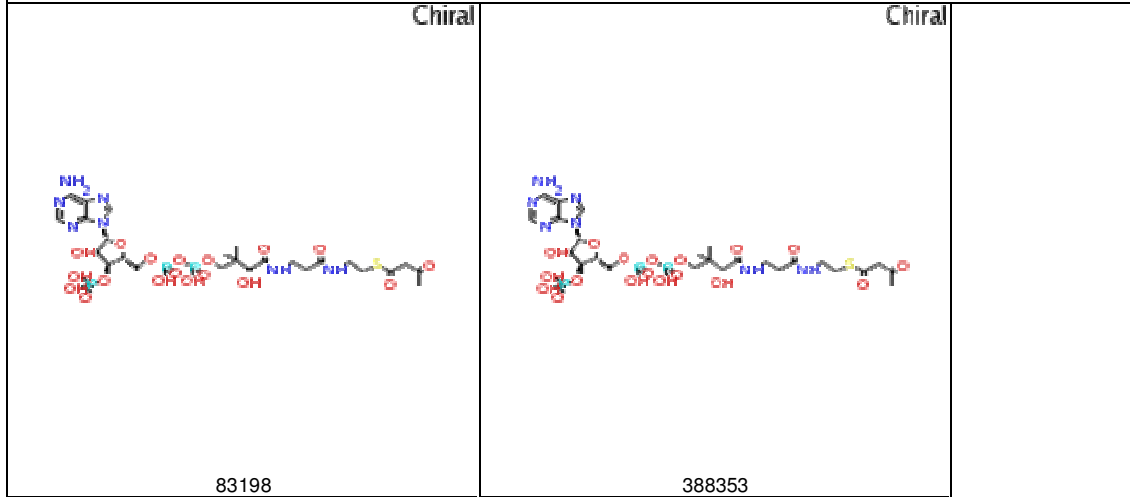

**Name: Uroporphyrinogen**

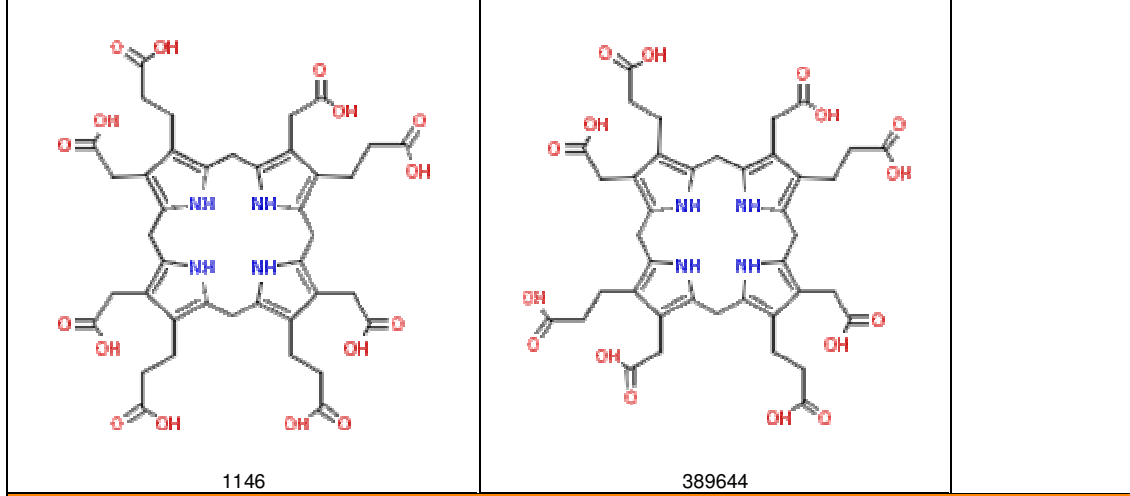

**Name: precorrin 2**

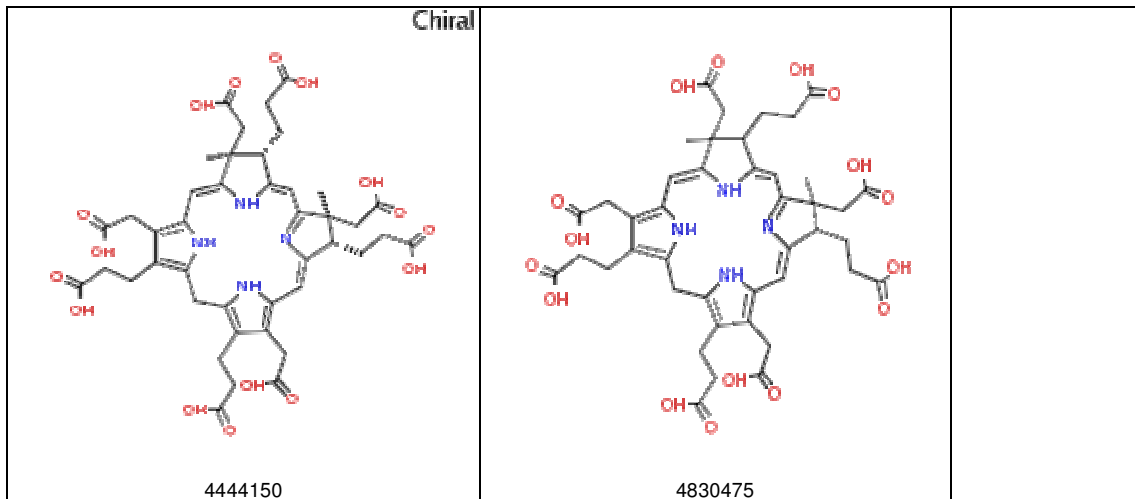

**Name: 4-hydroxynonenal**

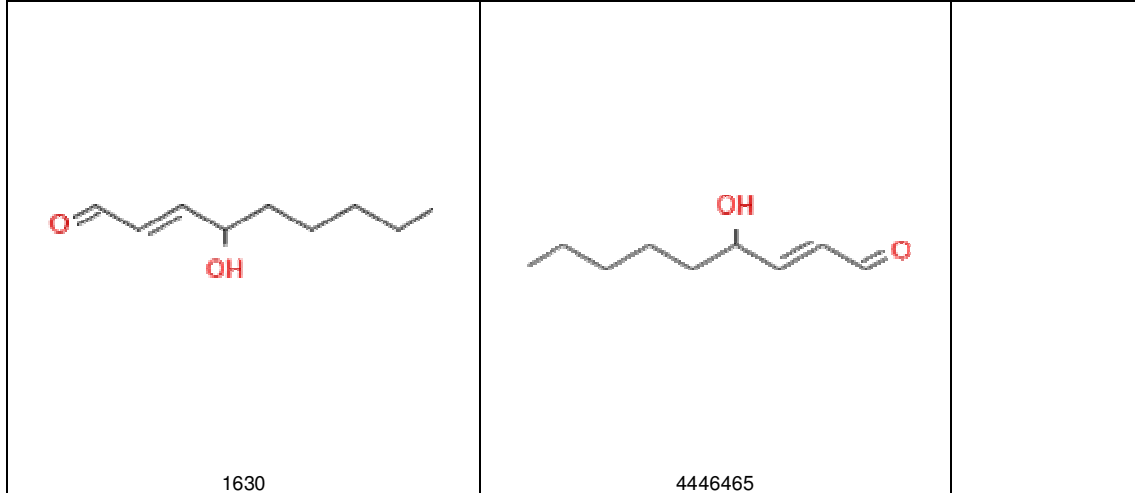

**Name: epicatechin gallate**

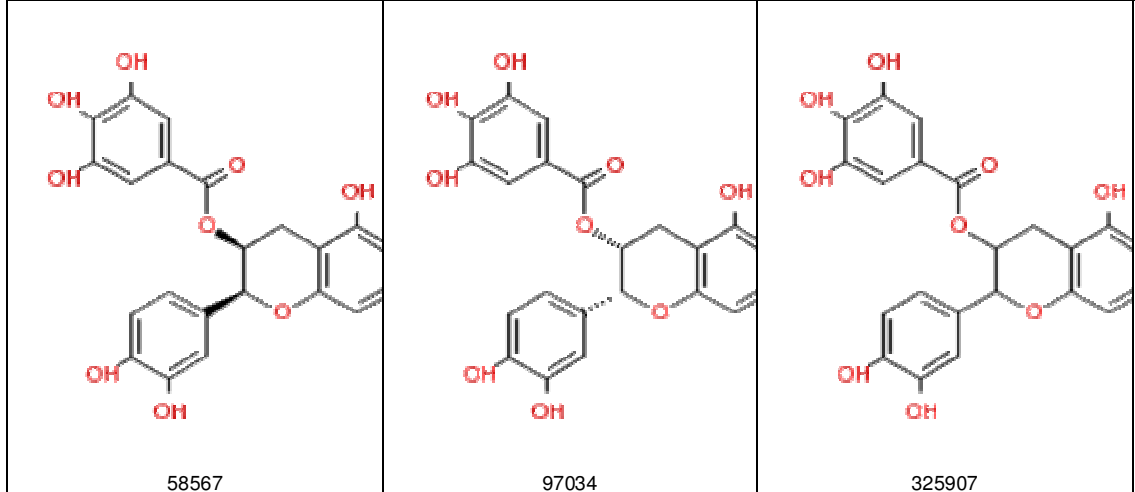

**Name: hexanoyl-CoA**



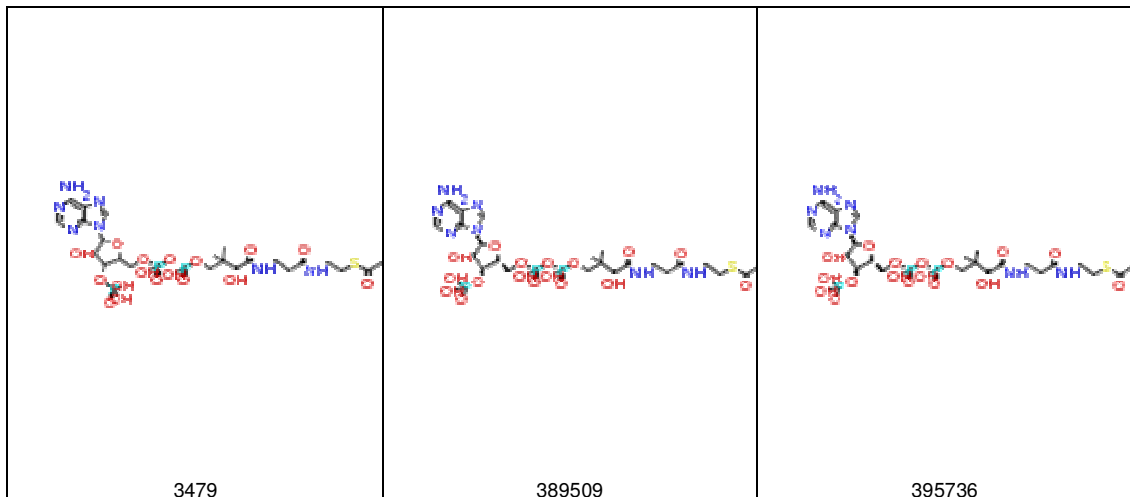

**Name: valine tRNA**

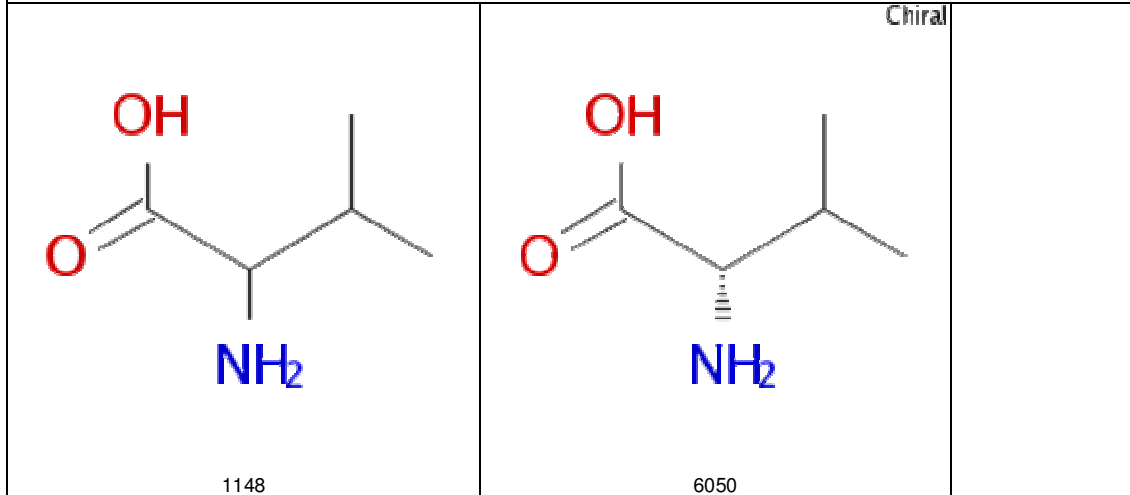

**Name: haematoporphyrin**

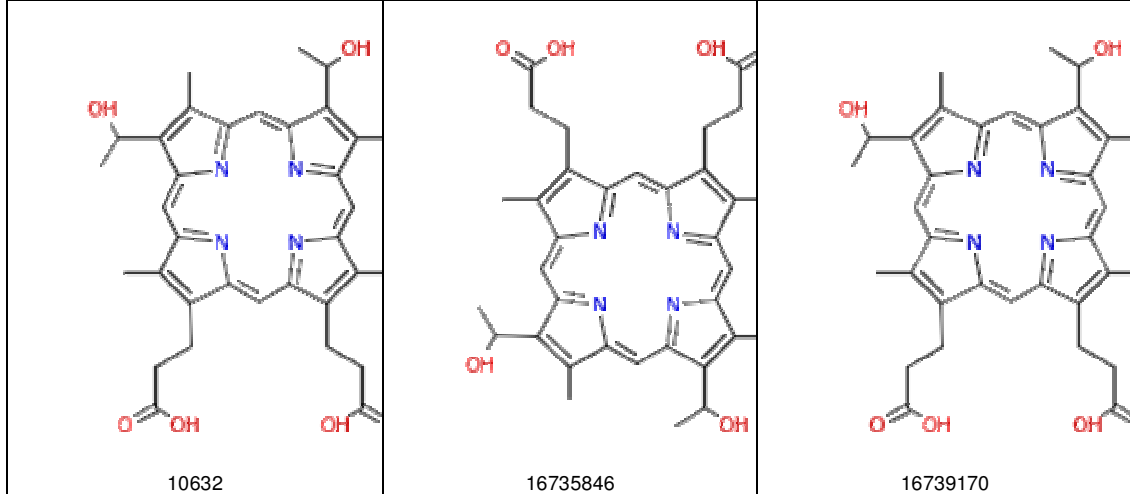

**Name: isovaleryl-CoA**

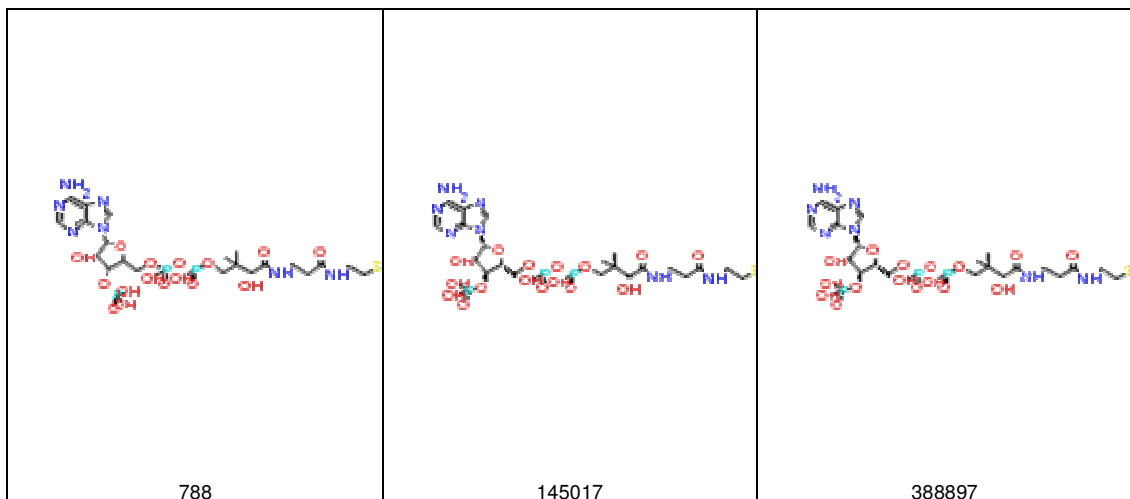

**Name: hygromycin B**

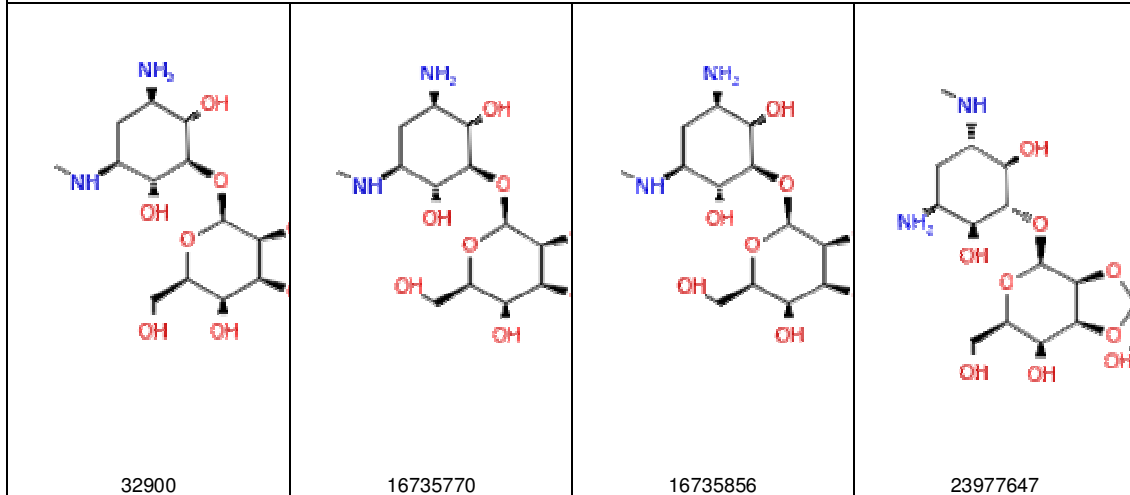

**Name: homo-gamma-linolenic acid**

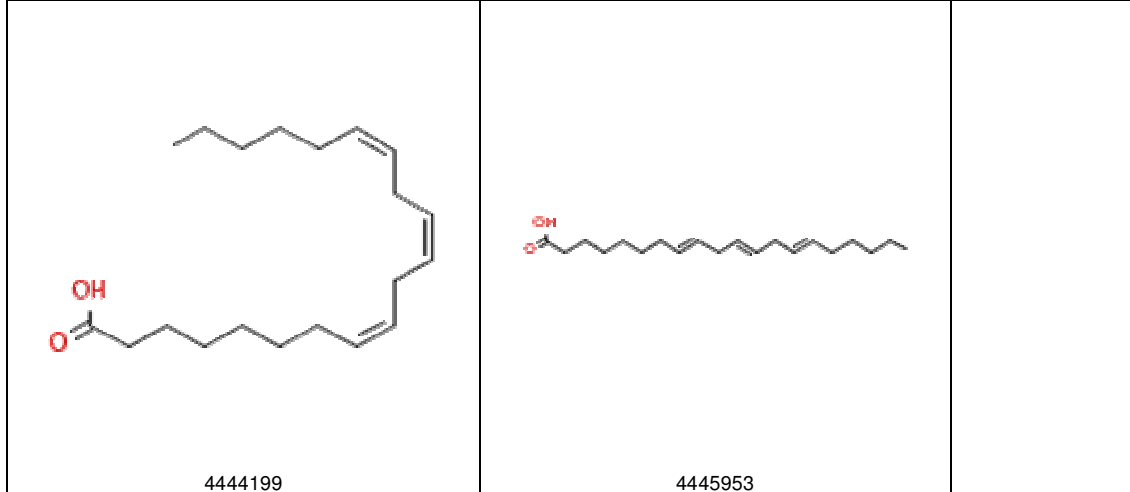

**Name: Chloramphenicol**

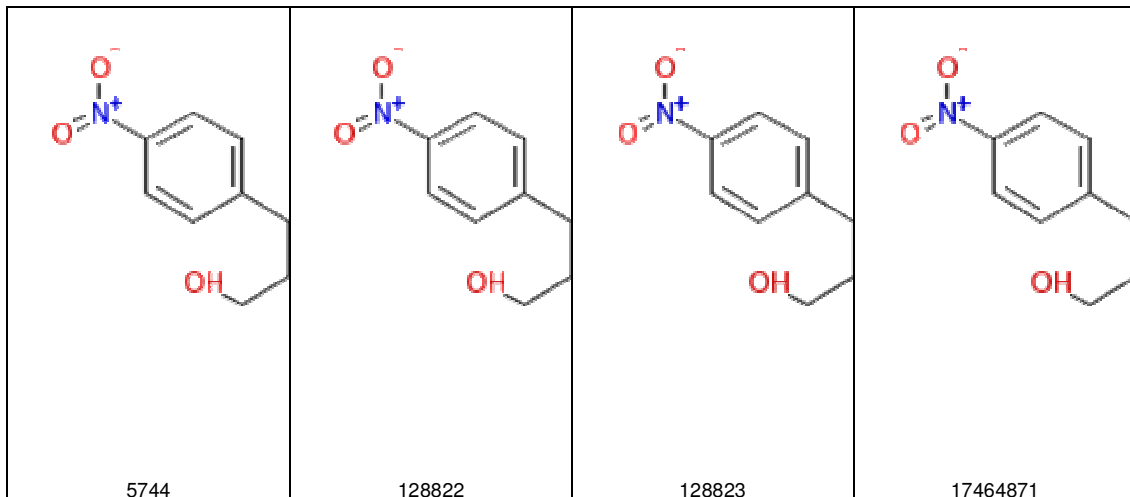

**Name: benzoyl-CoA**

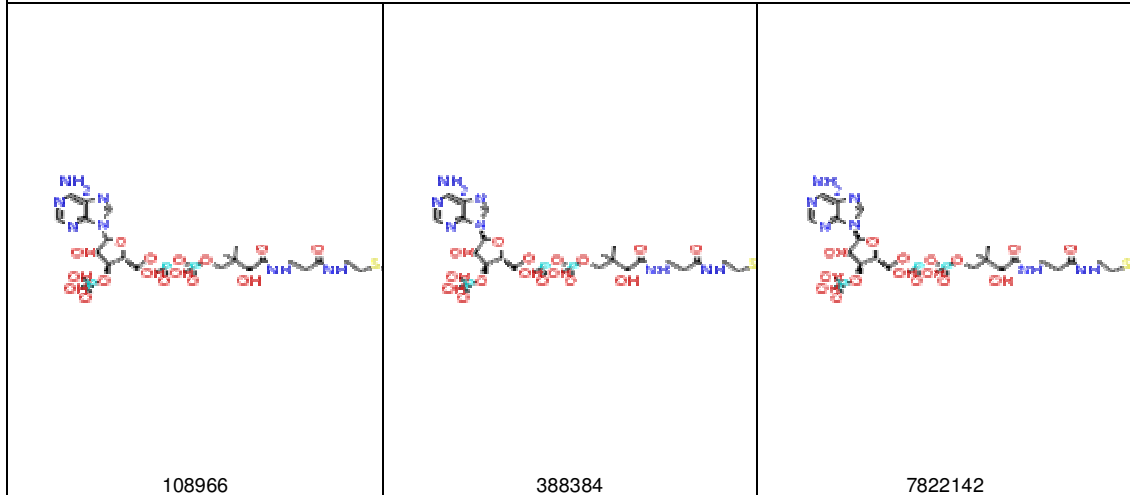

**Name: threo-Ds-isocitrate**

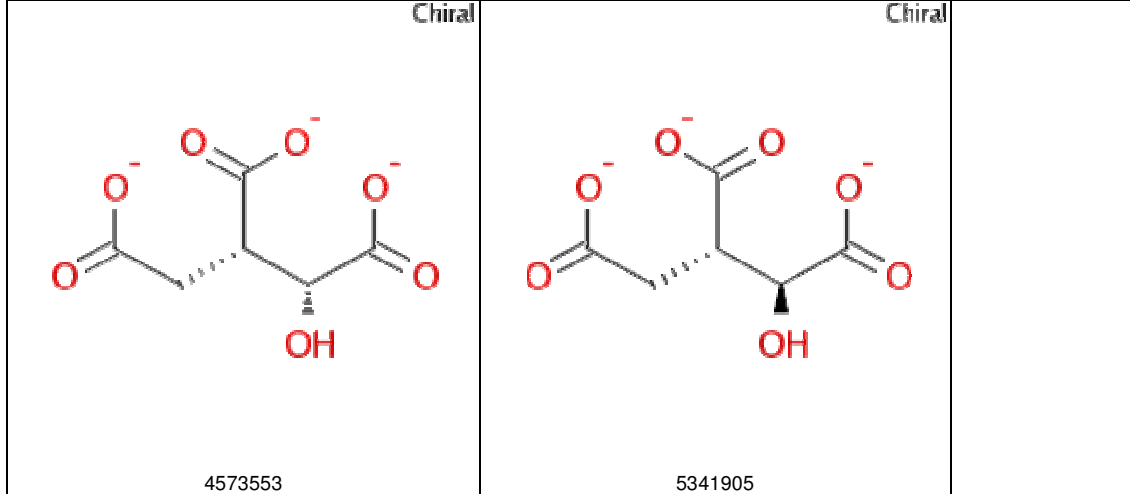

**Name: tocopherol**

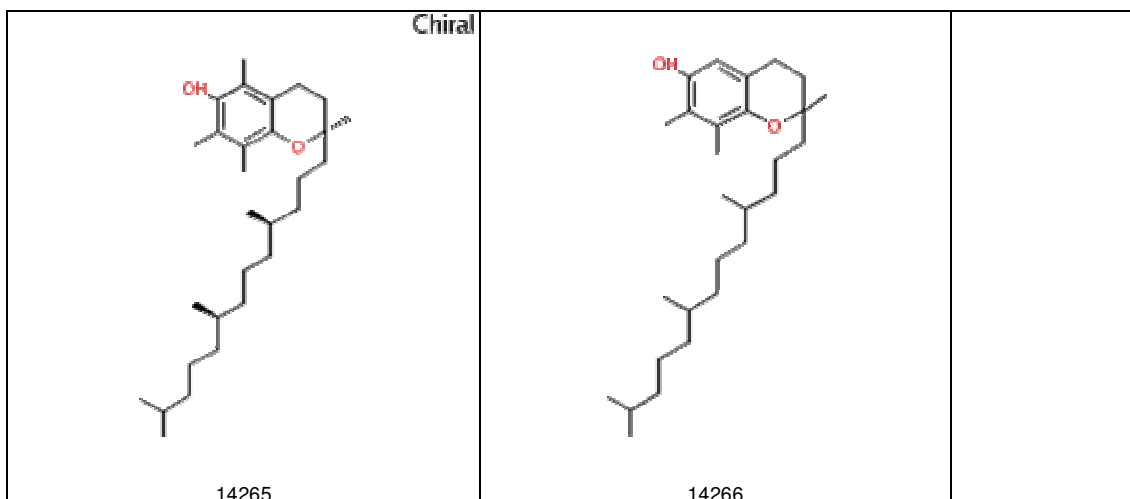

**Name: D-Pantethine**

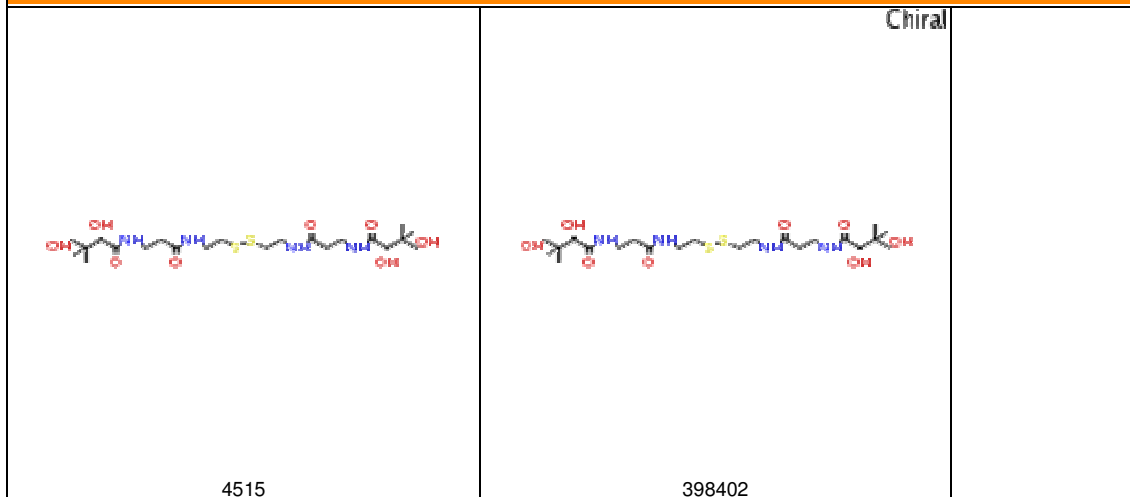

**Name: bradykinin**

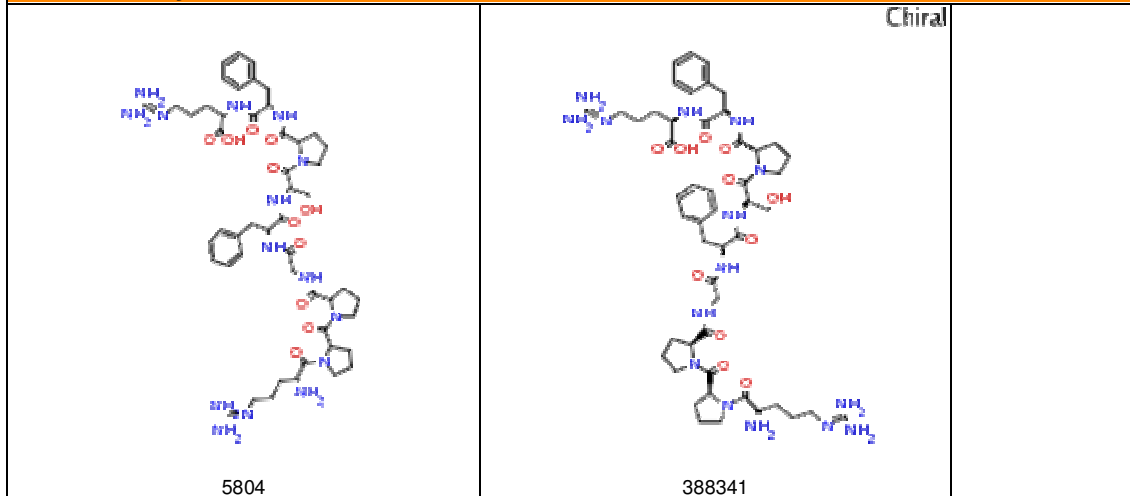

**Name: antimony**

Sb

8992

Sb

4510681

Name: hydrogen

HH

762

H

4515072

Name: Apomorphine

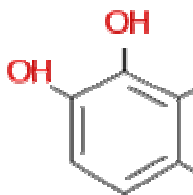

2129

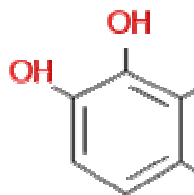

5783

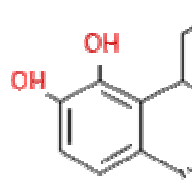

9039

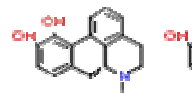

97017

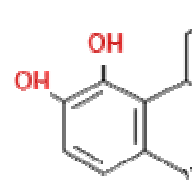

23099928

Name: lithium

Li

2293625

LiH

16787515

Name: squalene 2,3-oxide

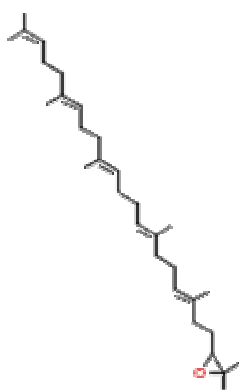

673

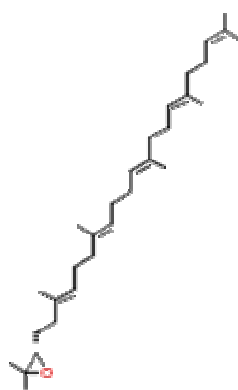

4573579

Chiral

Name: vaccenic acid

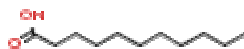

109077

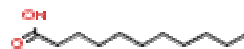

4444571

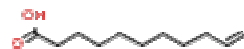

4445887

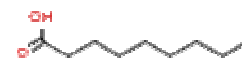

4445888

Name: vinpocetine

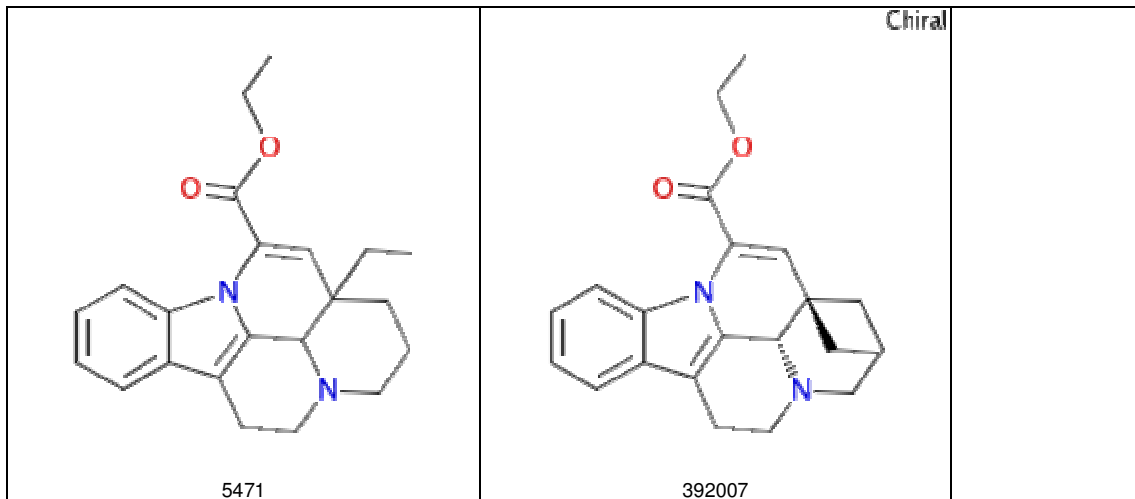

**Name: tryptophane**

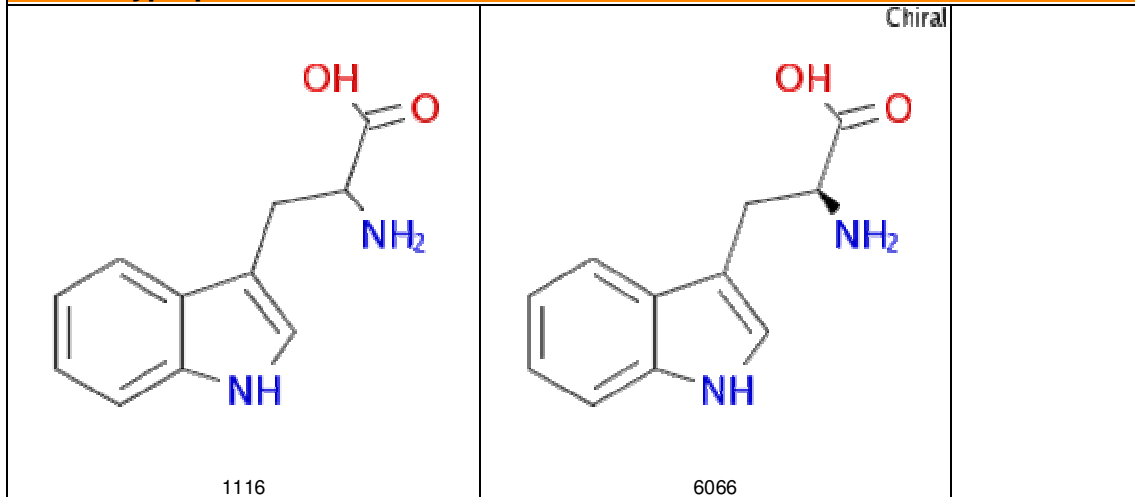

**Name: phorbol**

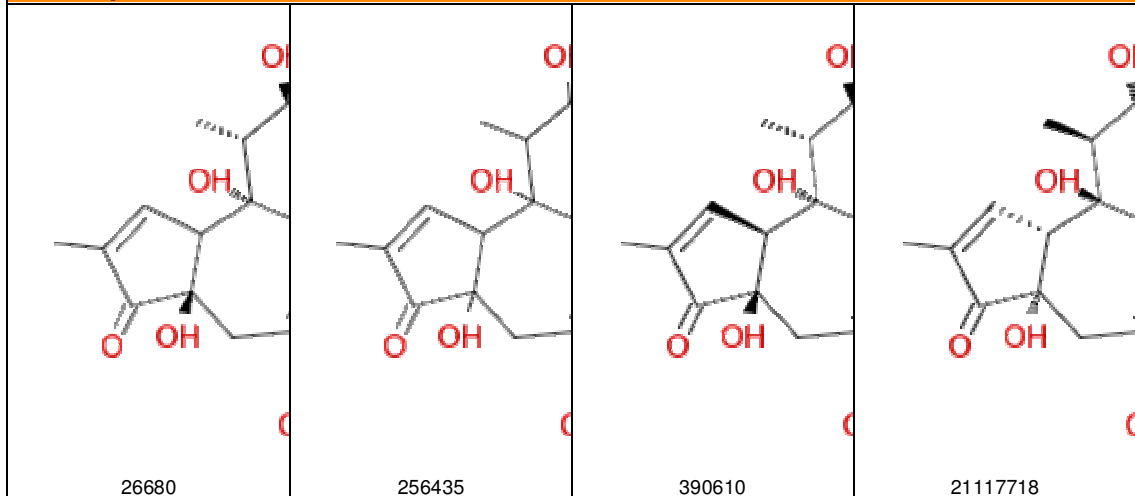

**Name: 17beta-estradiol 17-(beta-d-glucuronide)**

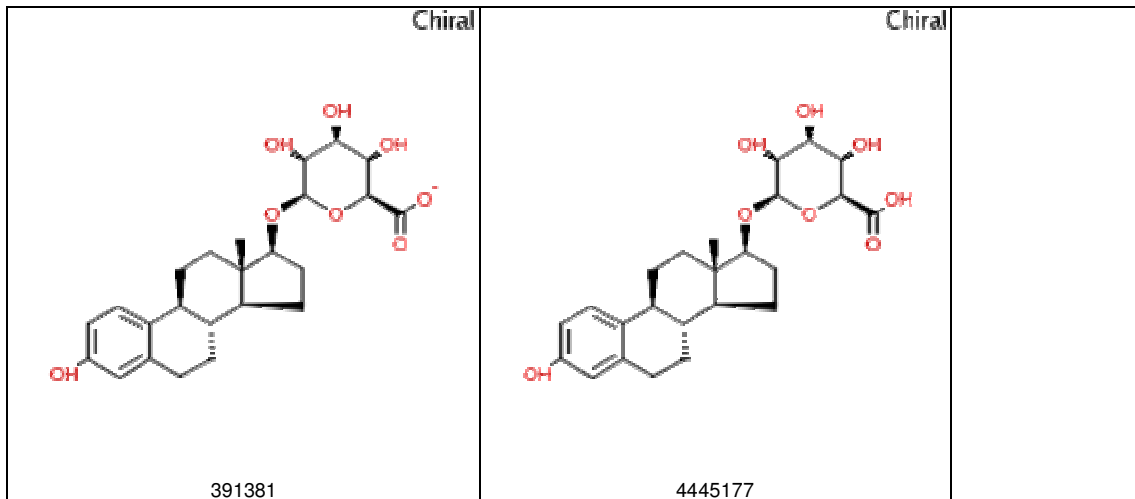

**Name: anacardic acid**

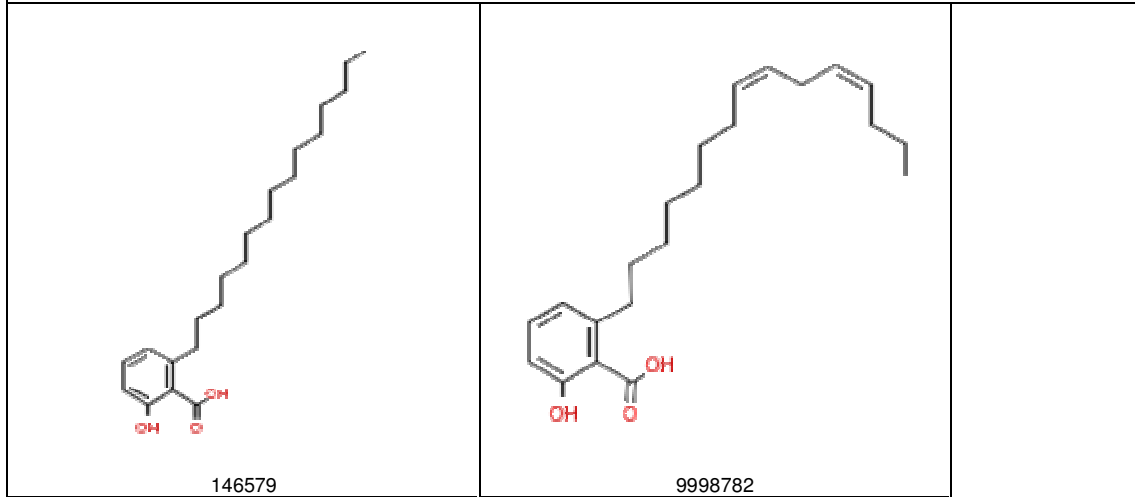

**Name: adenosine-monophosphate**

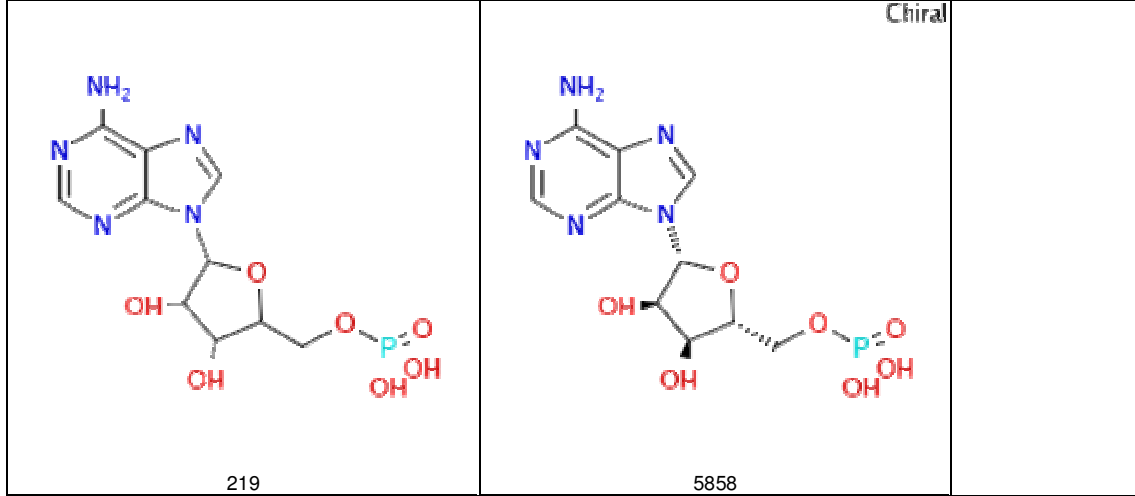

**Name: 24,25-dihydrolanosterol**



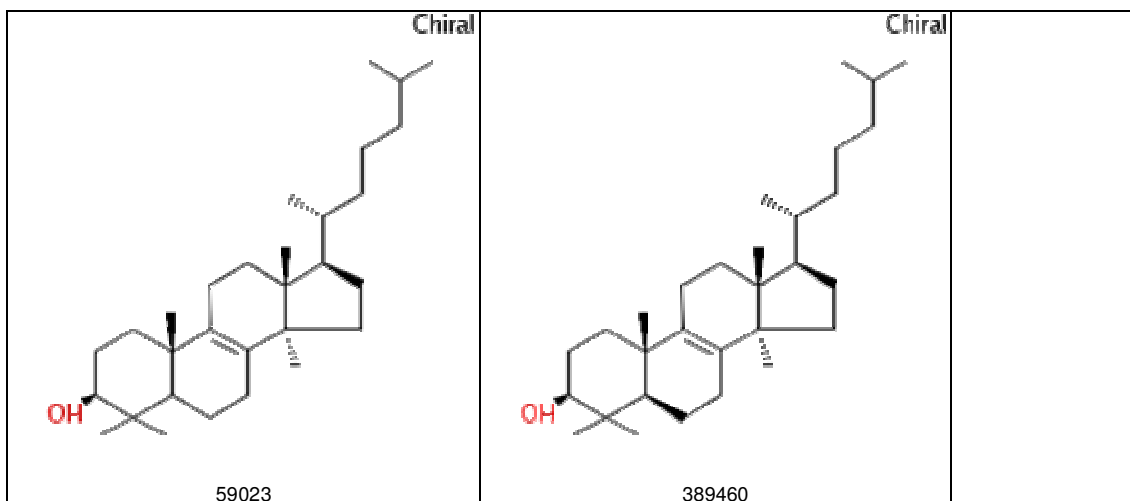

**Name: latrunculin B**

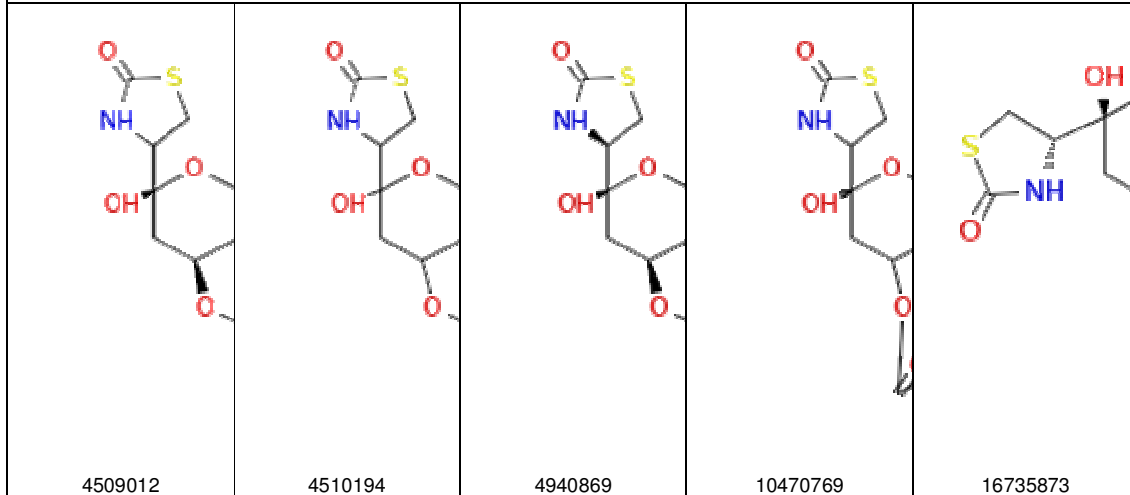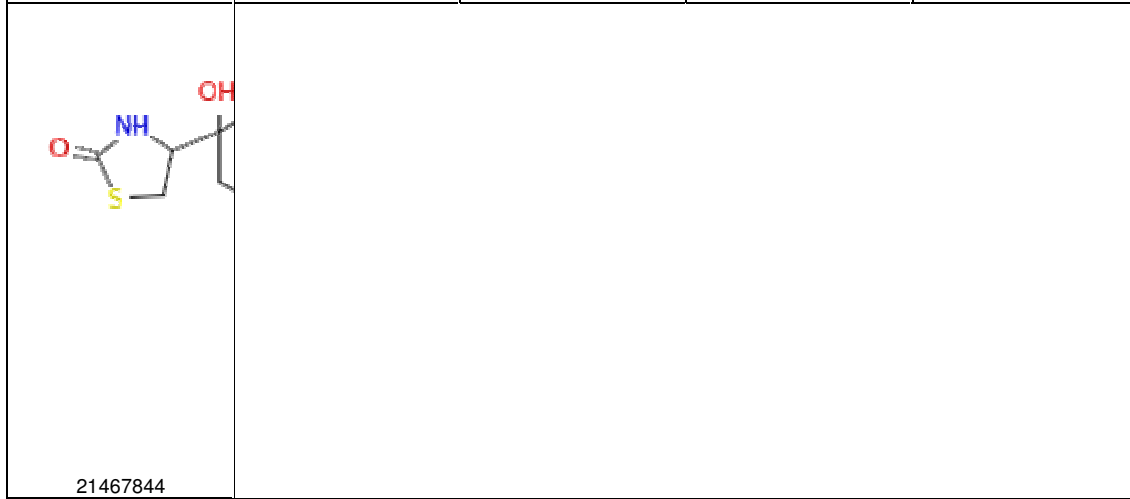

**Name: Epigallocatechin gallate**

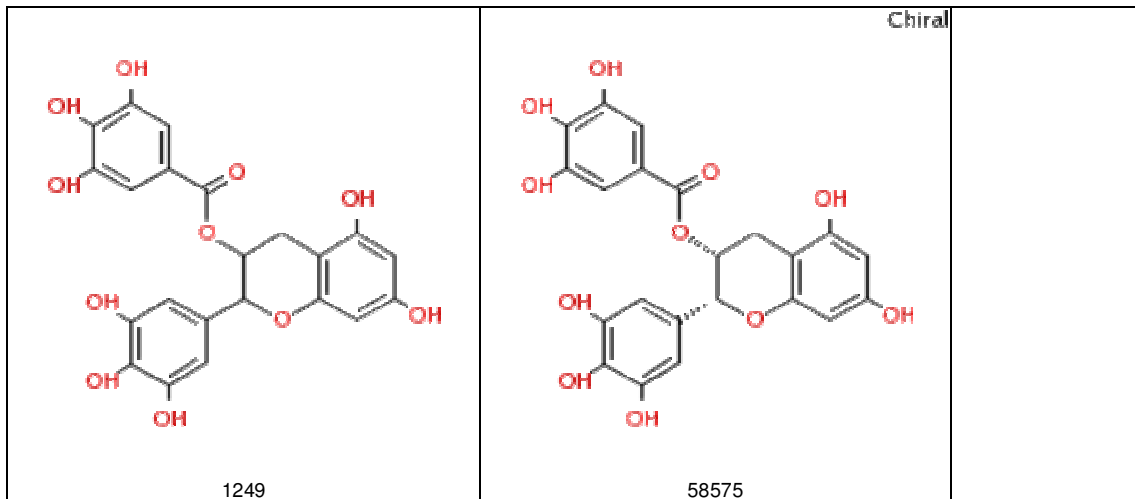

**Name: leukotriene C**

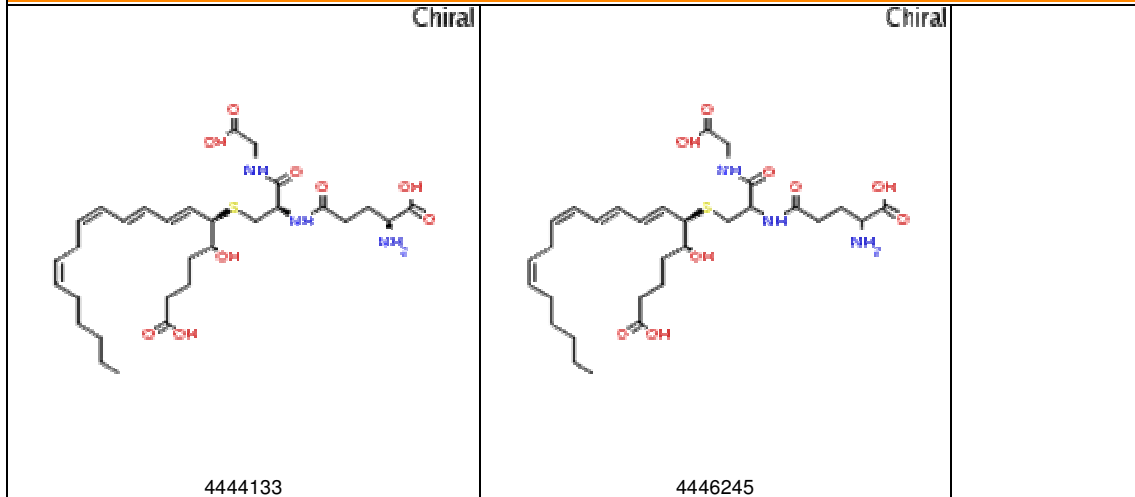

**Name: aphidicolin**

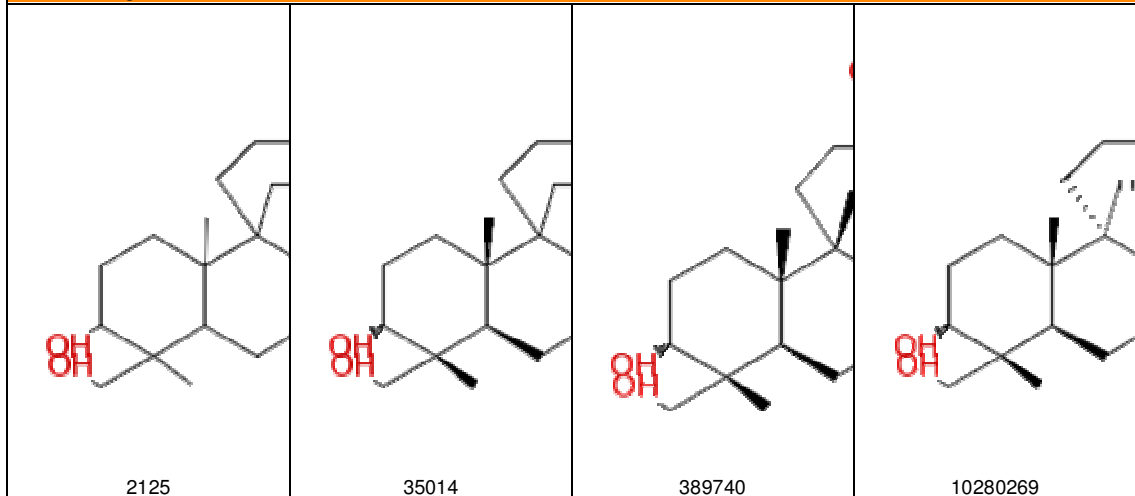

**Name: N6-methyladenosine**

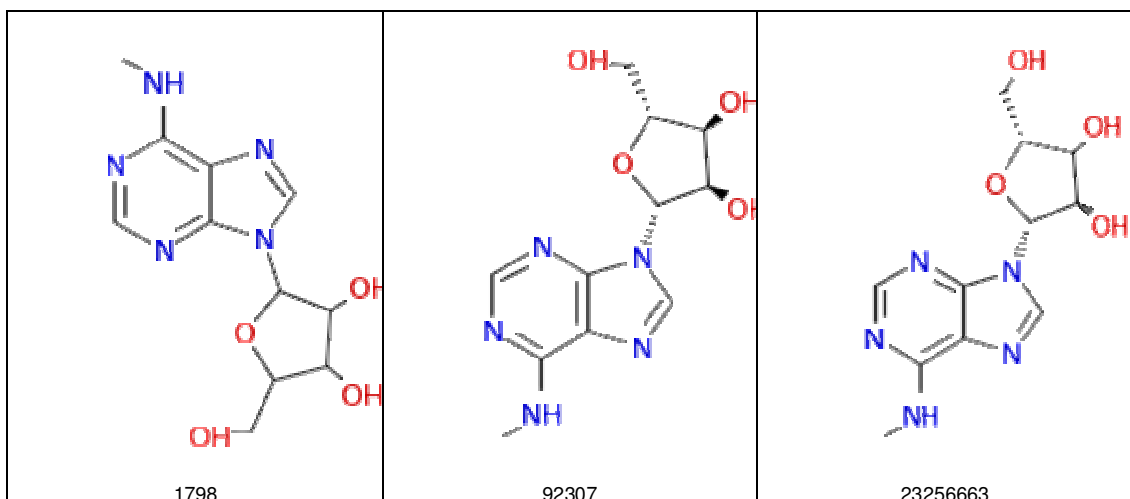

**Name: uroporphyrin III**

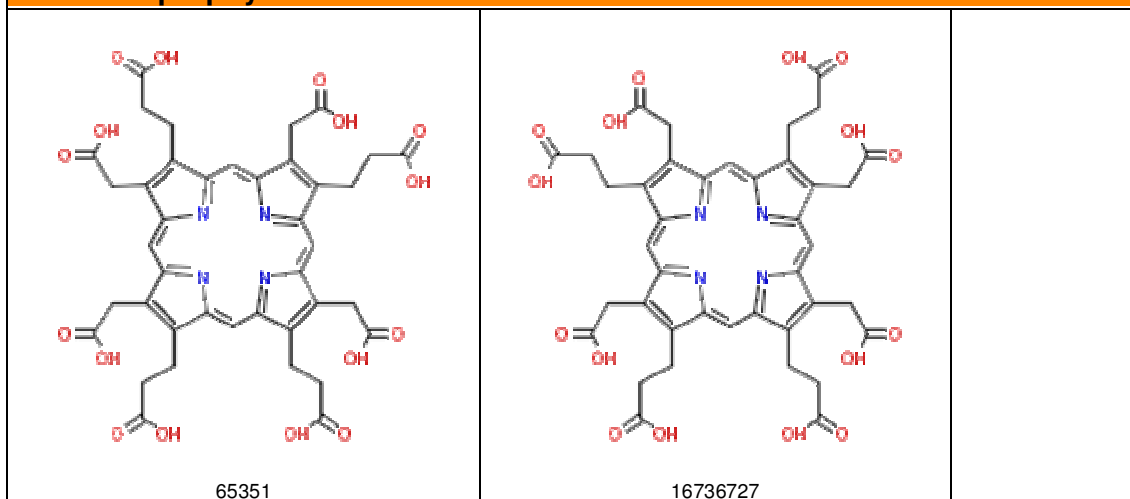

**Name: chymostatin**

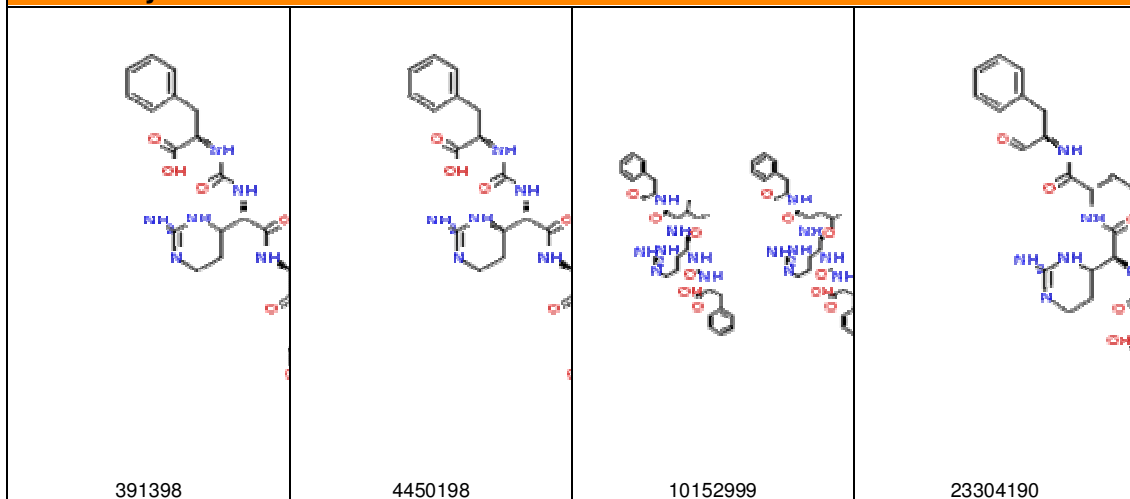

**Name: GDP-mannose**

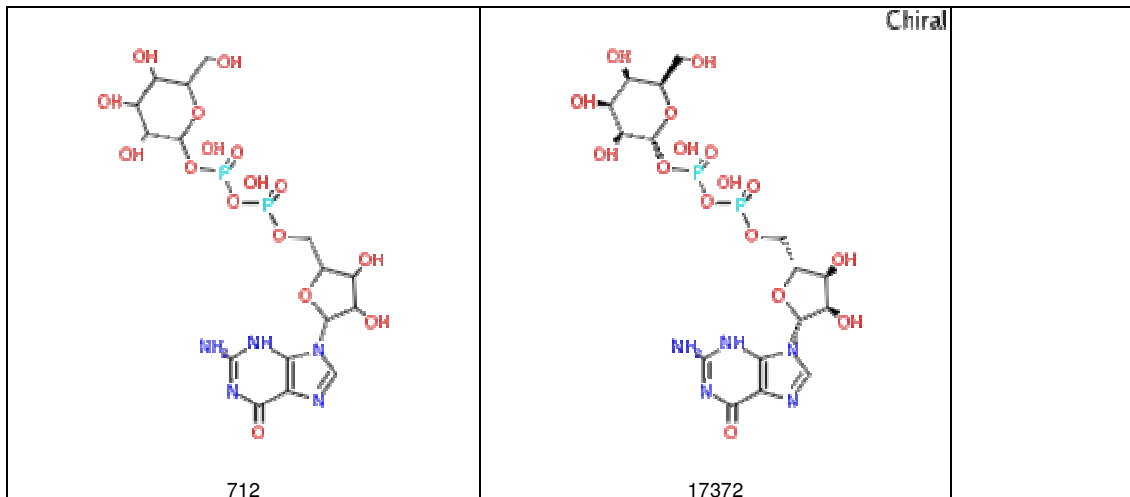

**Name: flavopiridol**

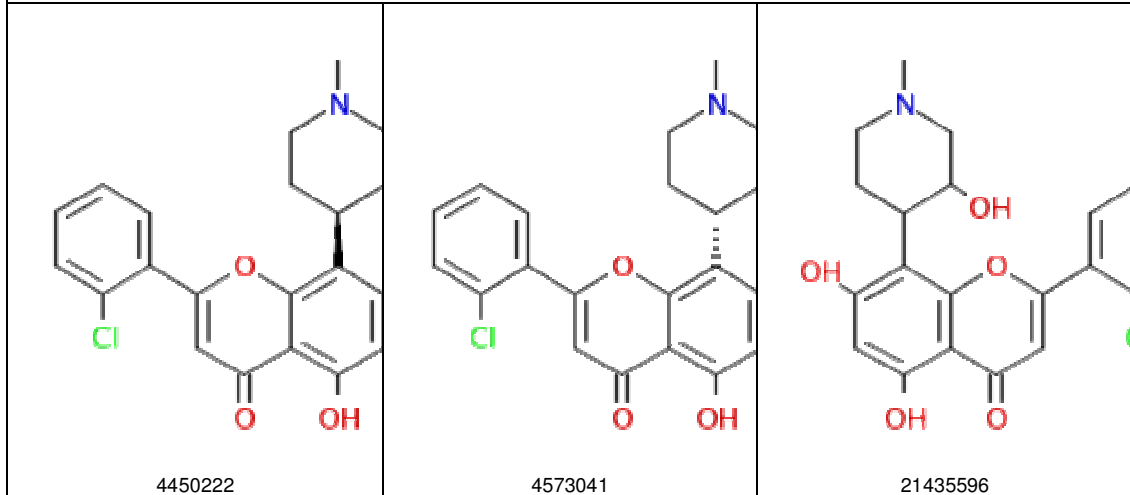

**Name: alpha-difluoromethylornithine**

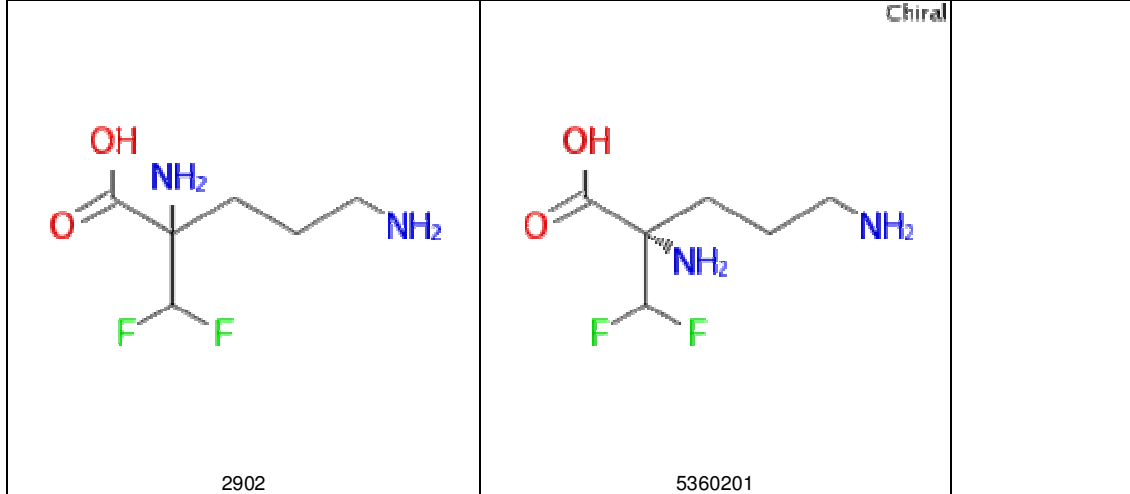

**Name: undecaprenyl phosphate**

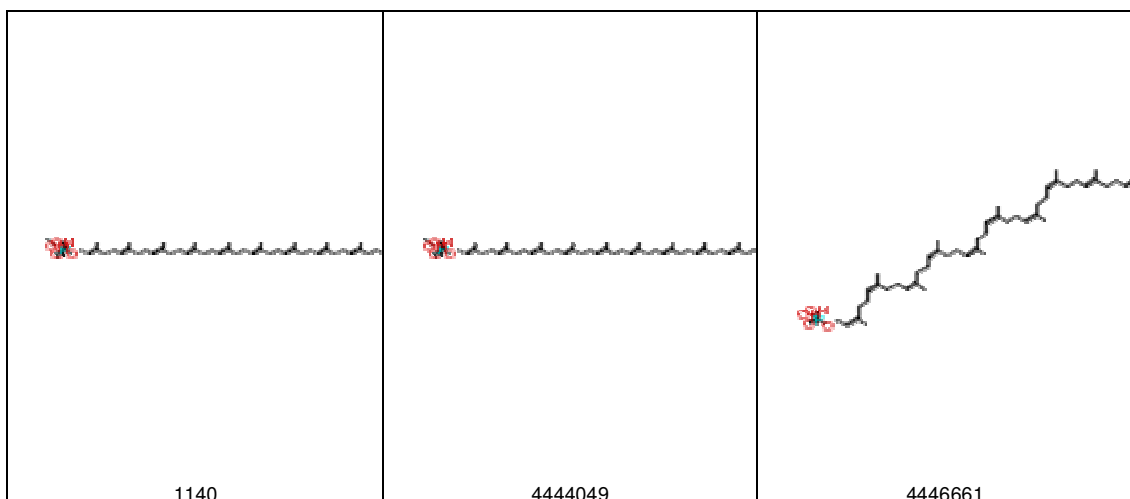

Name: thujone

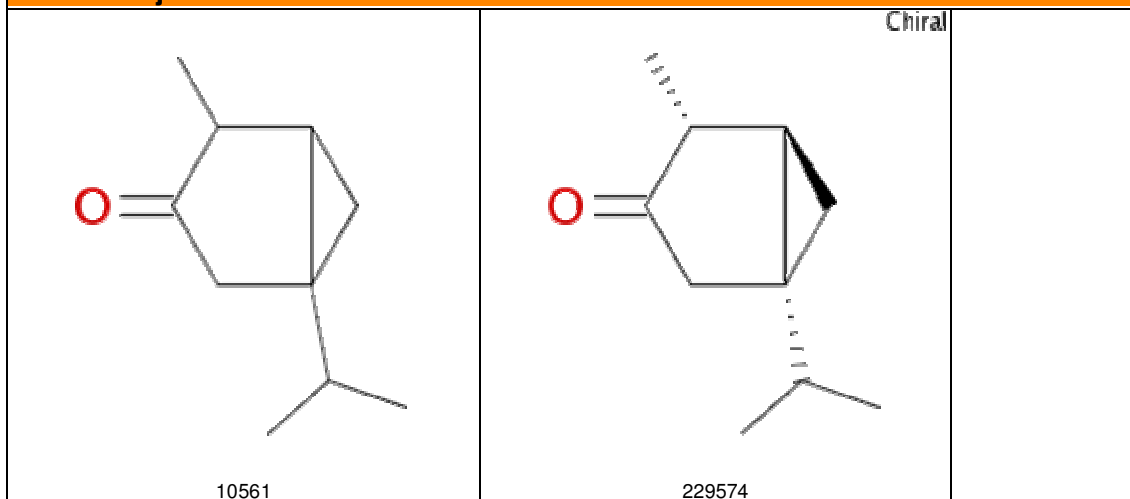

Name: asp

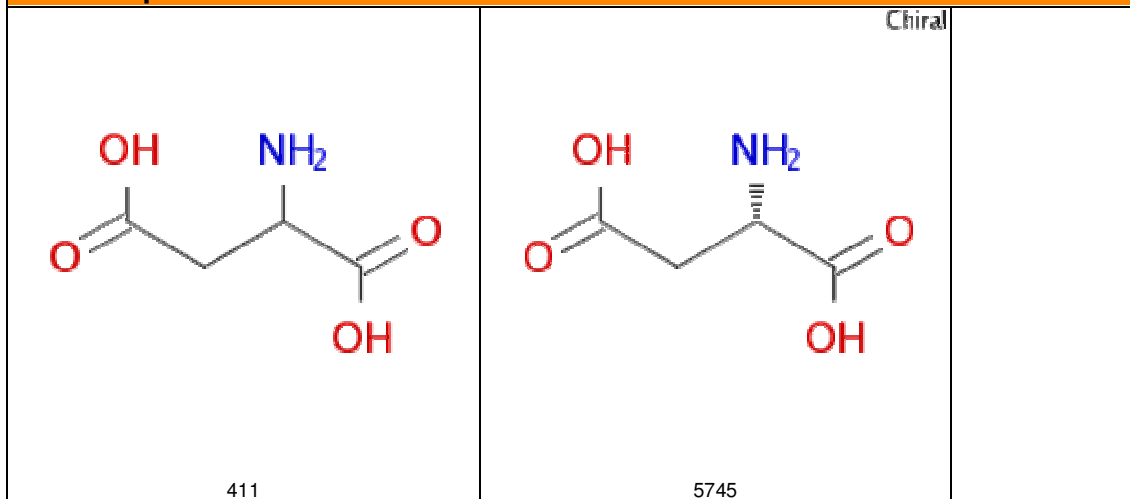

Name: orotidylic acid

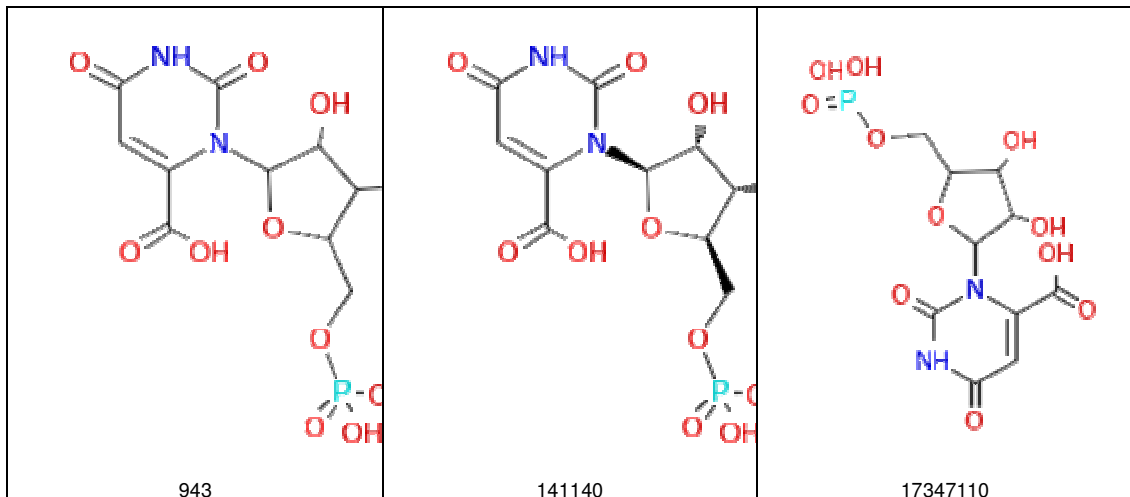

**Name: lysine tRNAs**

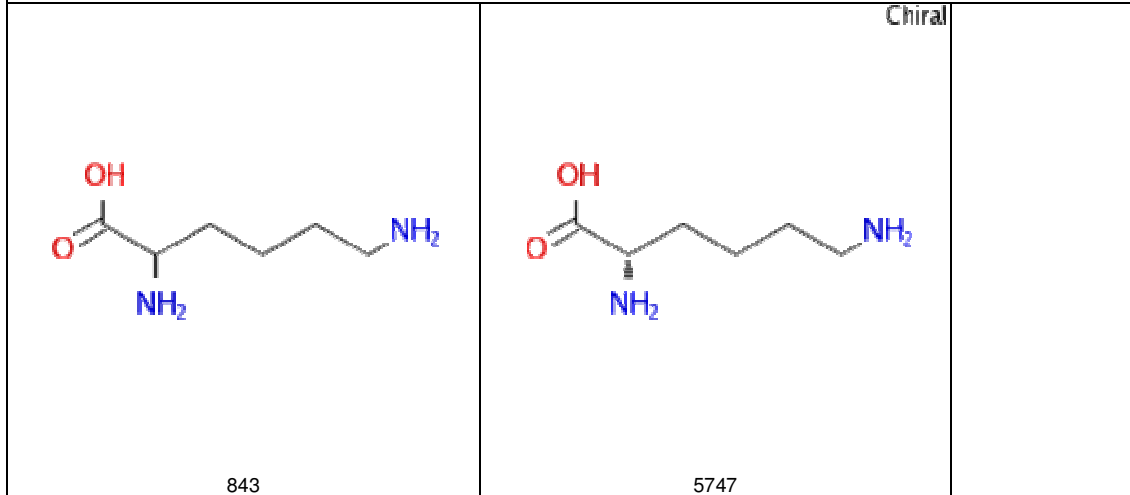

**Name: squalene 2,3-epoxide**

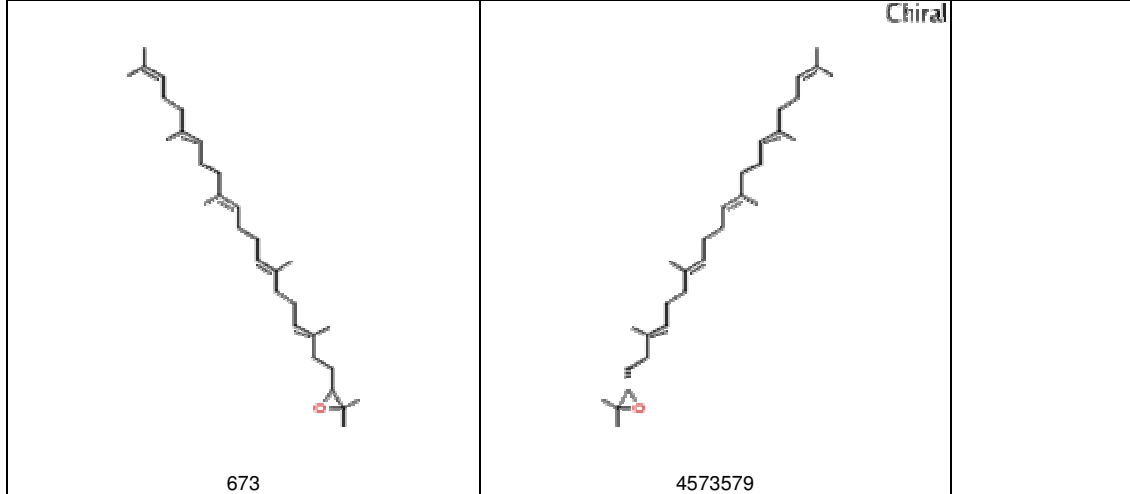

**Name: rutin**

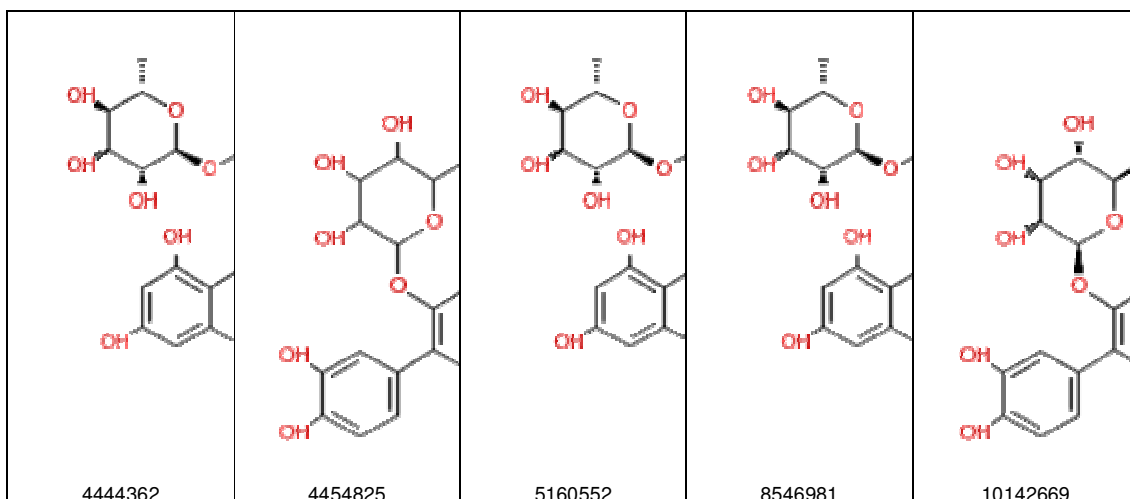

**Name: sn-glycerol 3-phosphate**

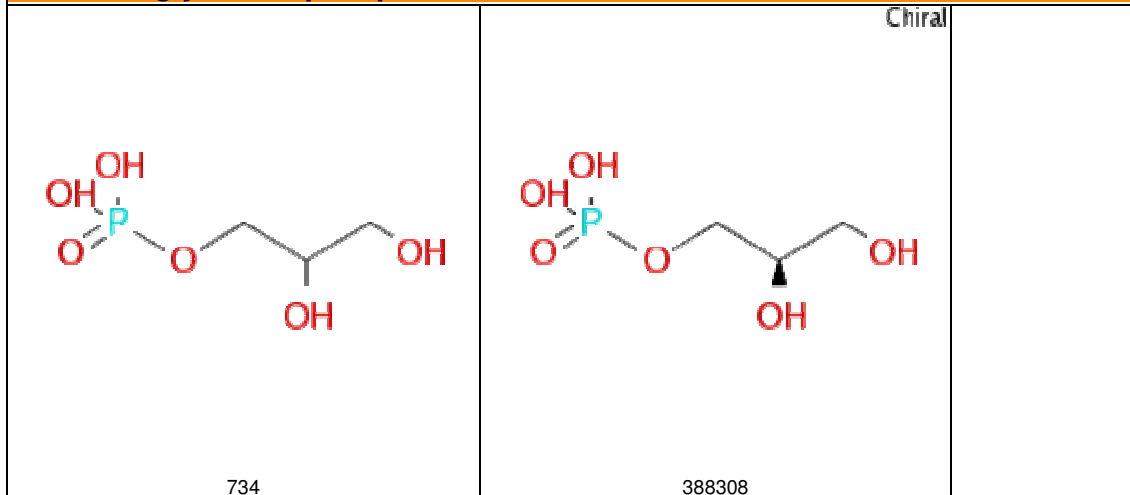

**Name: trifluperidol**

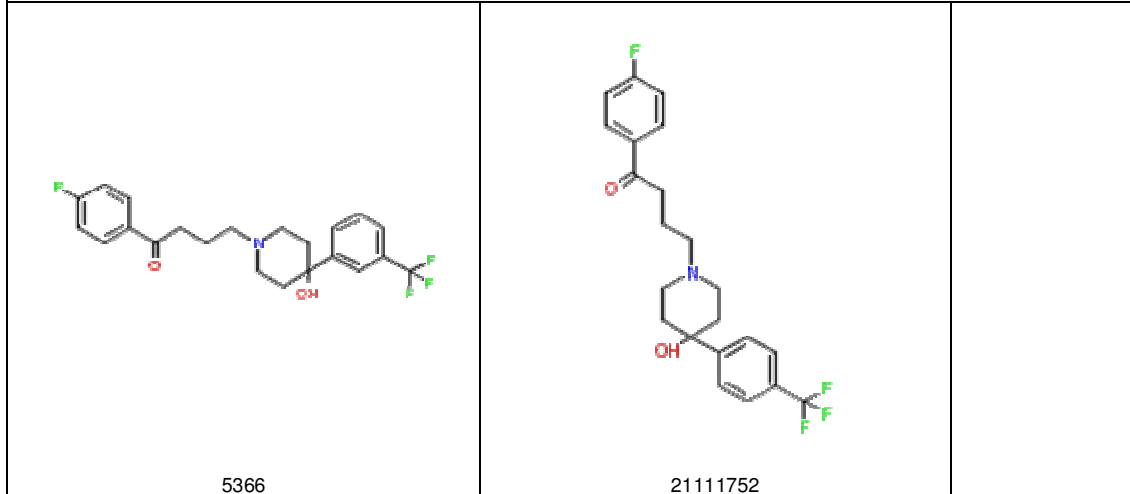

**Name: gamma-glu-cys**

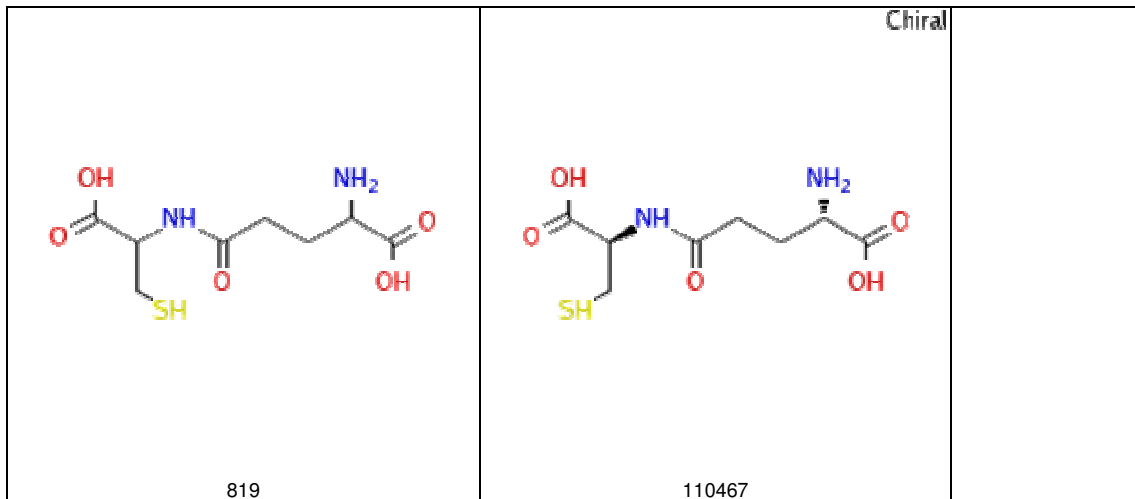

**Name: barium**

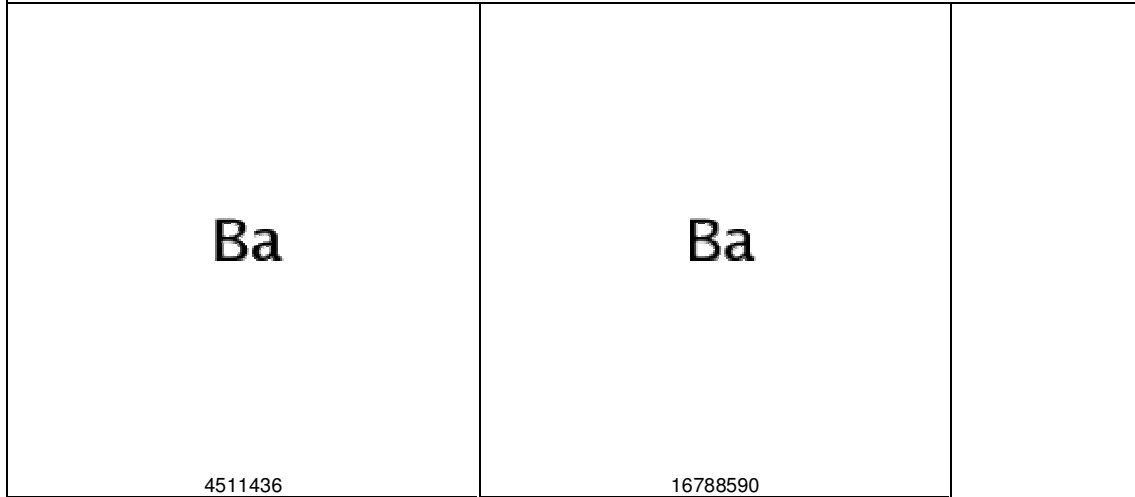

**Name: buthionine sulfoximine**

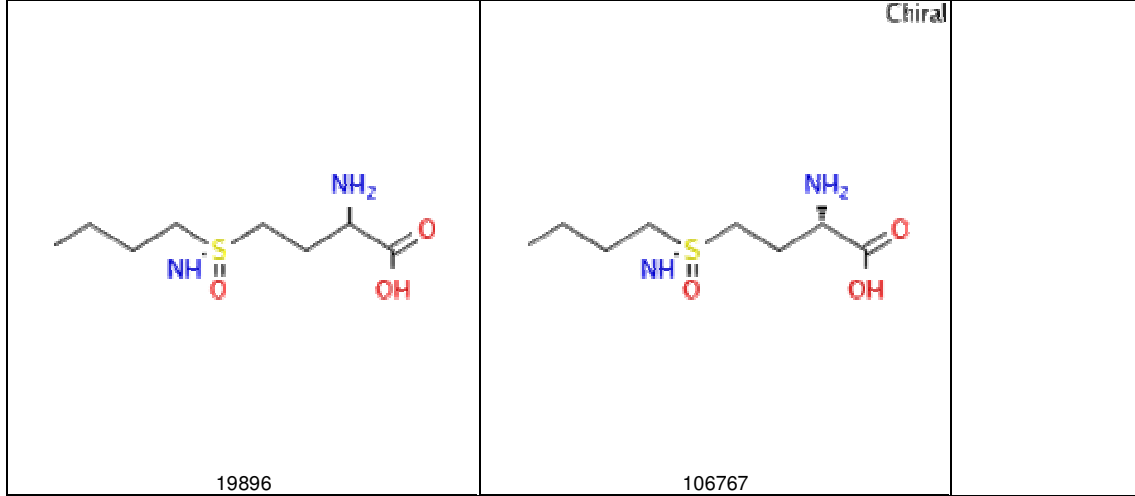

**Name: Asn**



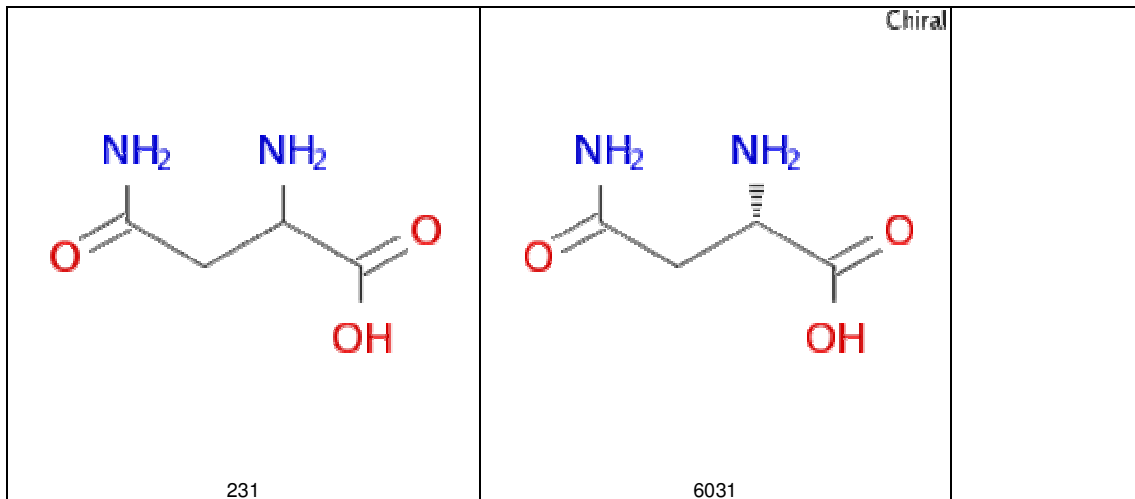

**Name: hesperidin**

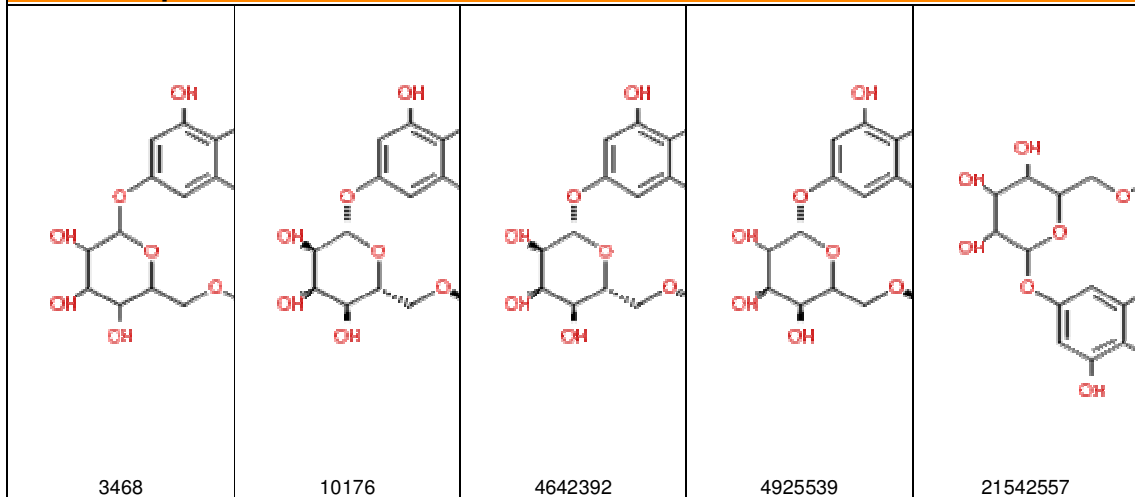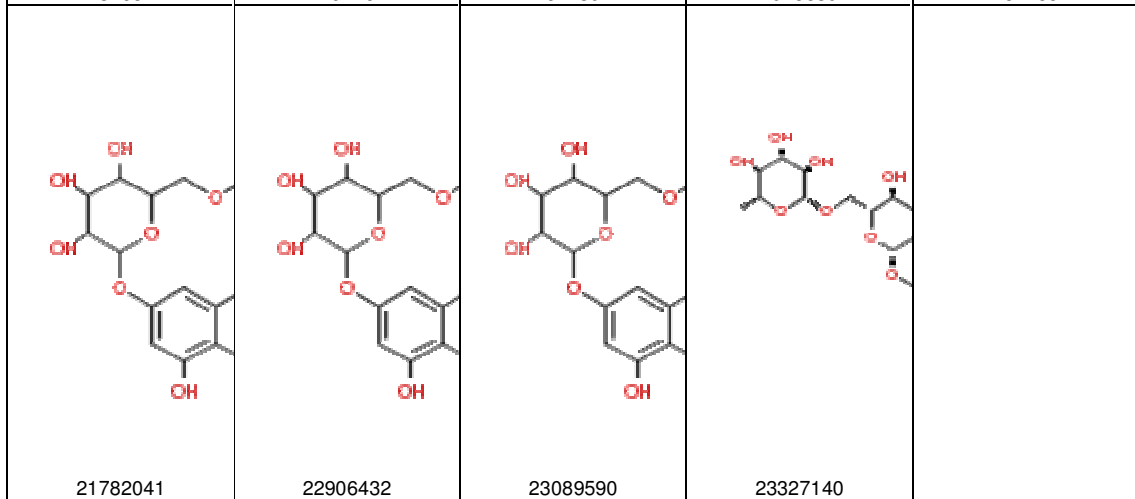

**Name: beta-d-fructose**

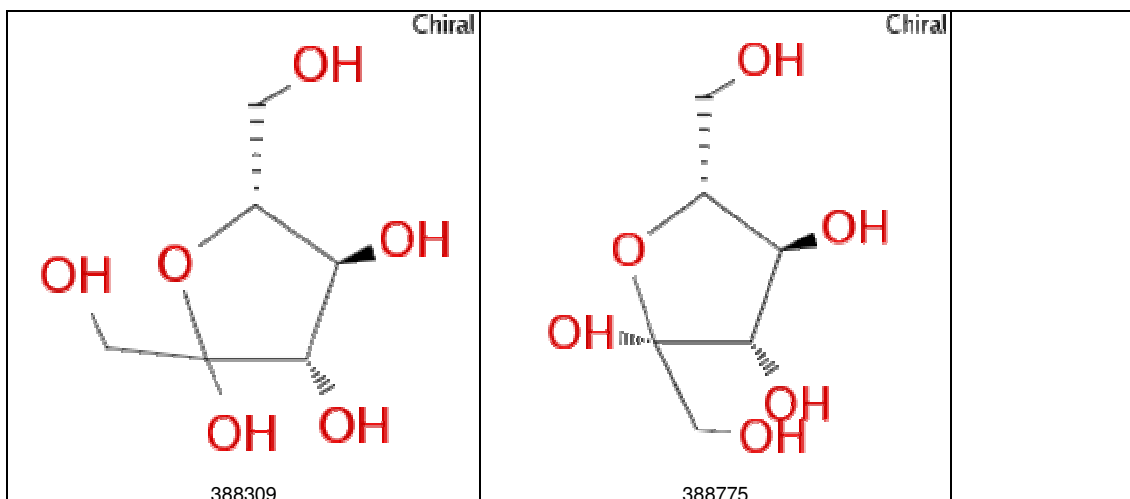

**Name: cytochalasin B**

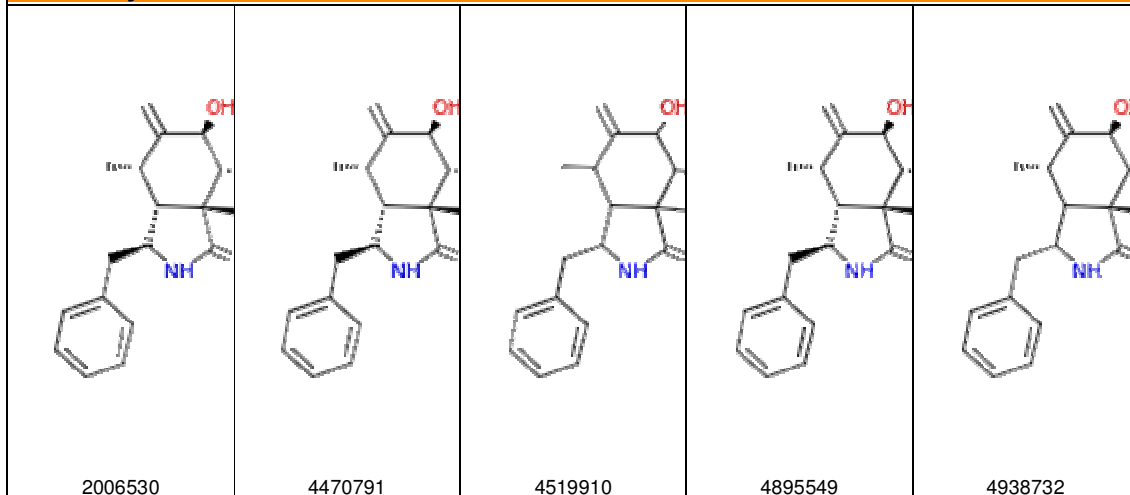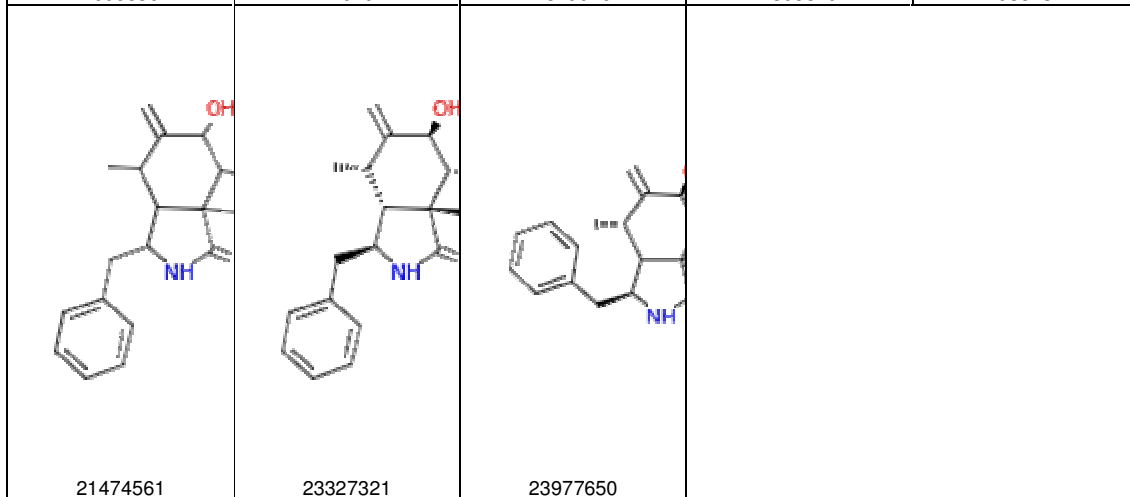

**Name: retinaldehyde**

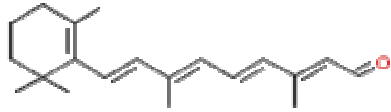

1041

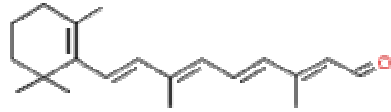

553582

**Name: leucine enkephalin**

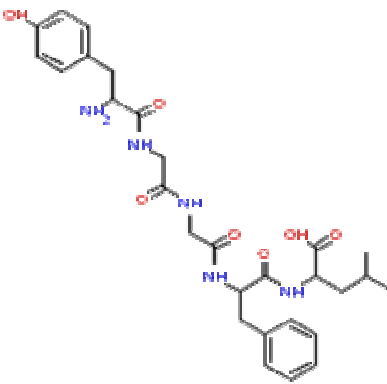

3766

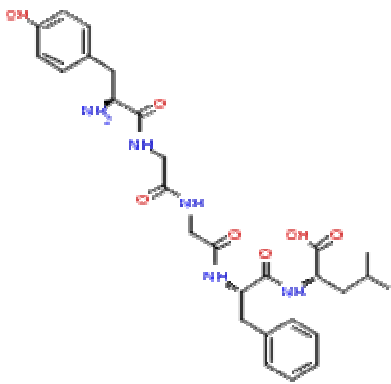

406229

Chiral

**Name: triamcinolone acetonide**

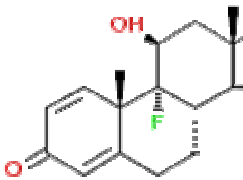

6196

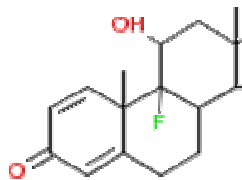

549644

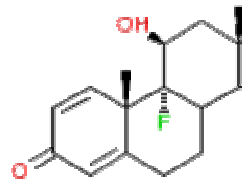

4642504

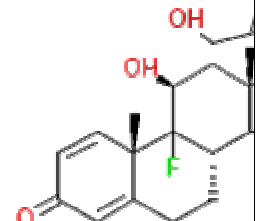

23975970

**Name: methionine tRNAs**

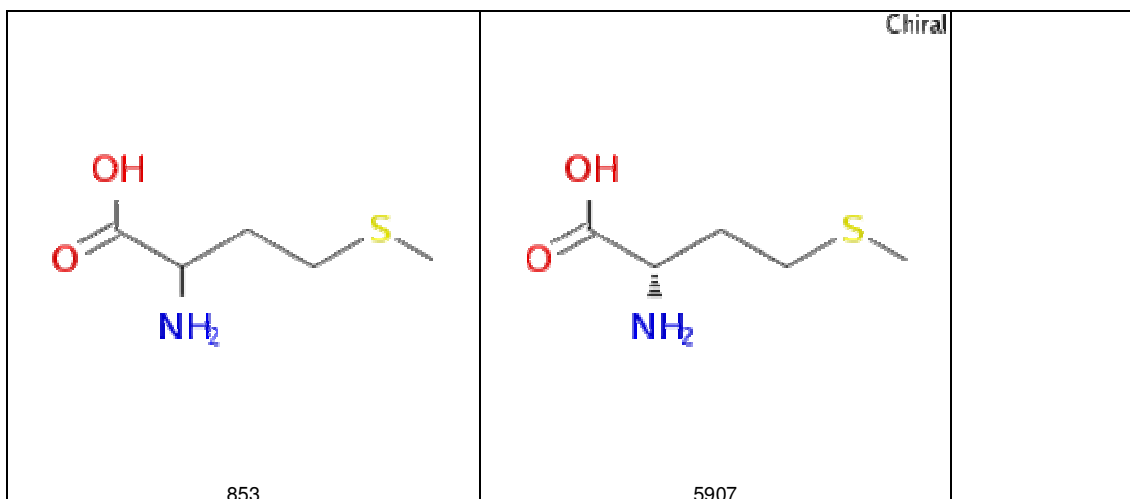

**Name: geldanamycin**

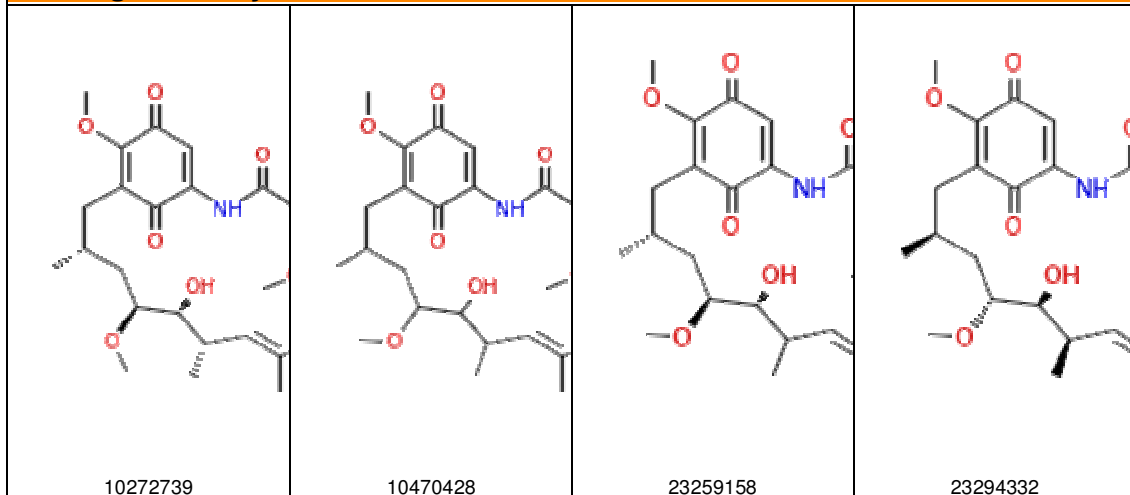

**Name: nigericin**

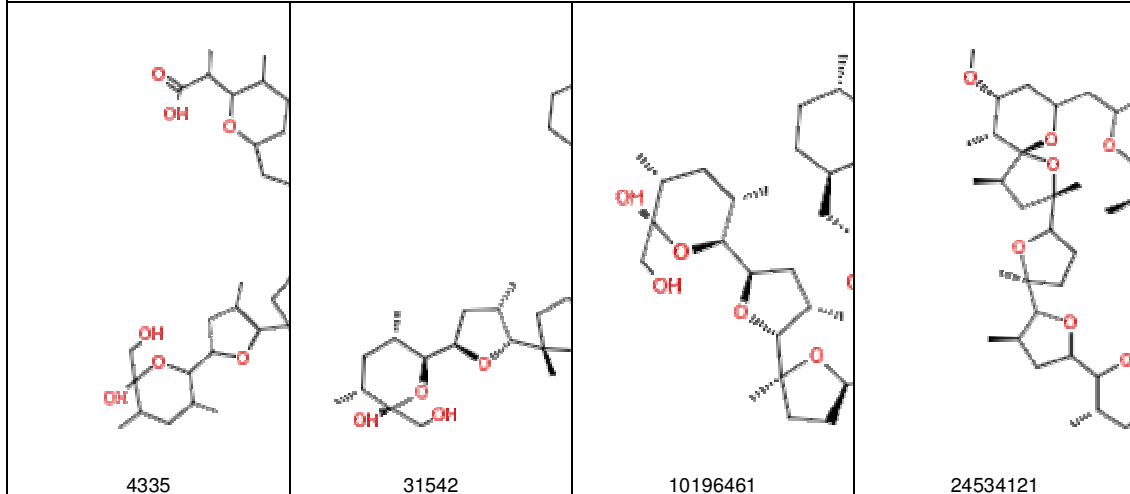

**Name: XTP**

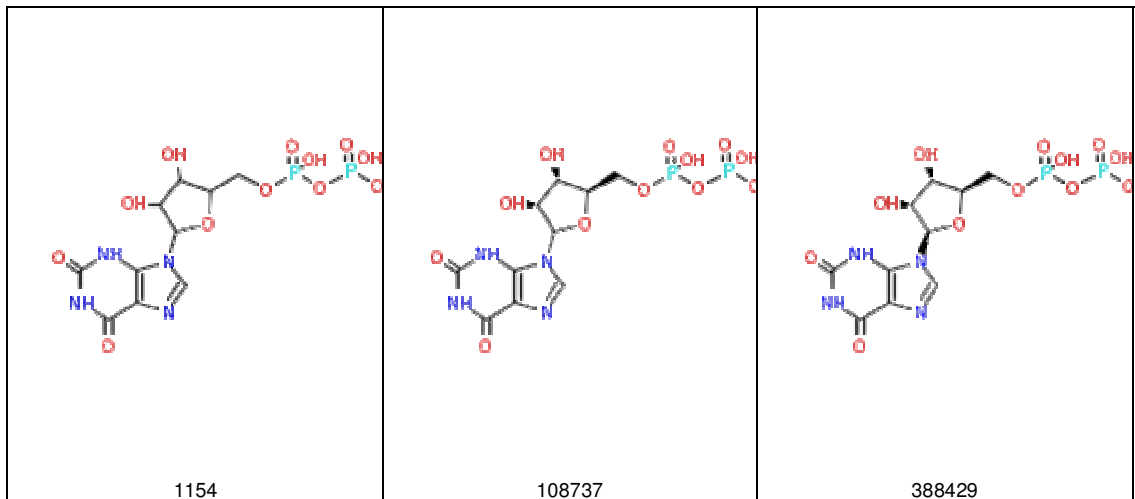

**Name: polymyxin B**

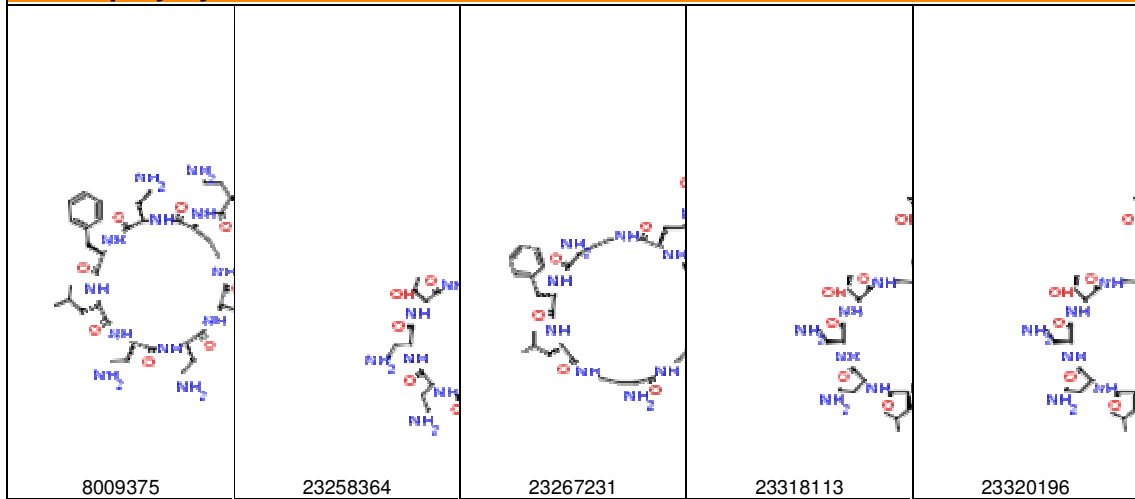

**Name: chlorhexidine**

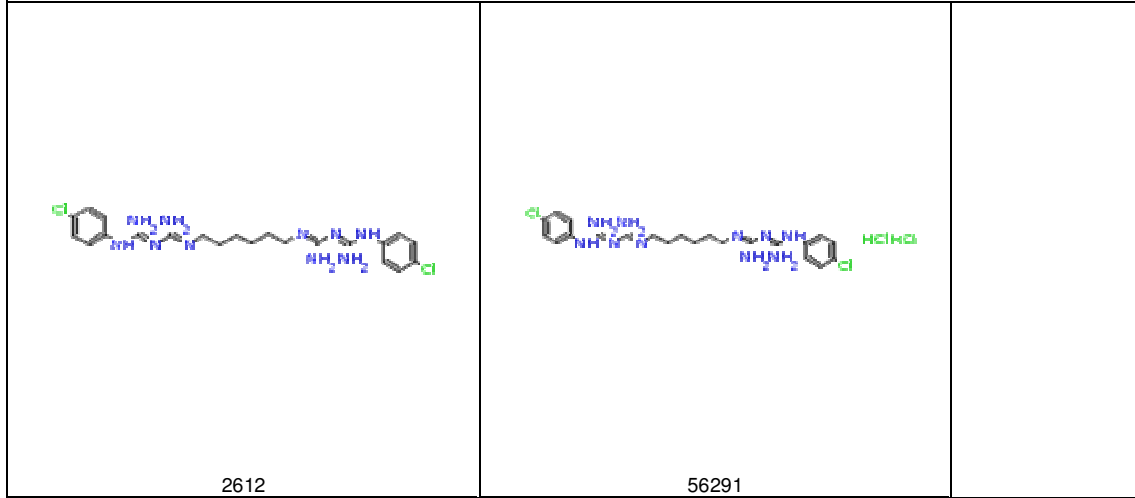

**Name: N10-formyltetrahydrofolate**

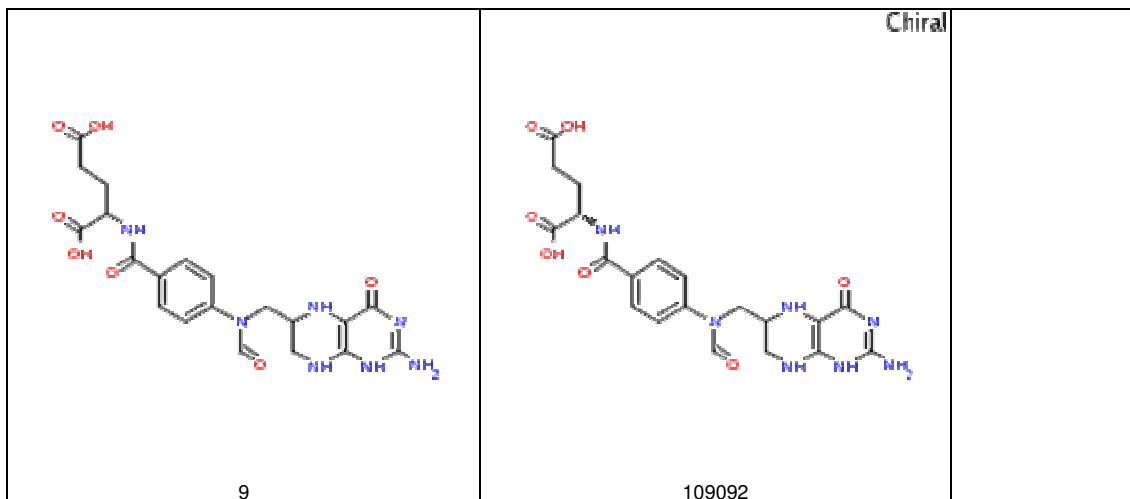

**Name: fenpropimorph**

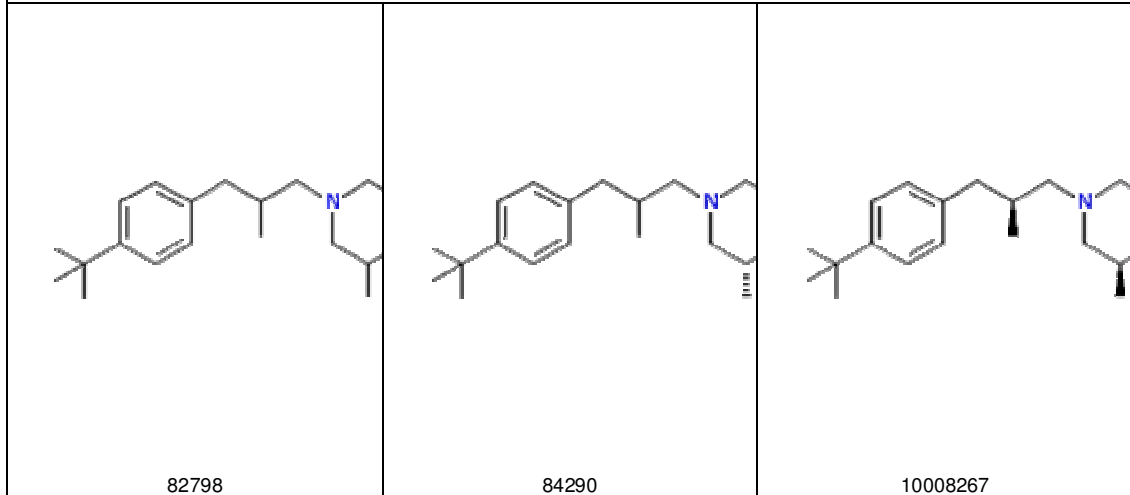

**Name: zeaxanthin**

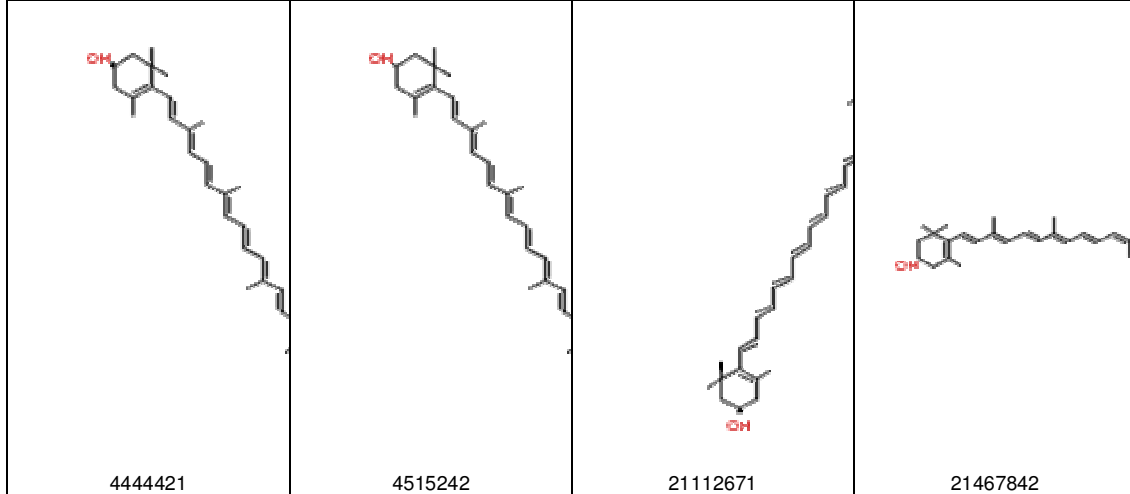

**Name: hexacosenoic acid**

|                                                                                                  |                                                                                                    |  |
|--------------------------------------------------------------------------------------------------|----------------------------------------------------------------------------------------------------|--|
|  <p>4945634</p> |  <p>23107098</p> |  |
|--------------------------------------------------------------------------------------------------|----------------------------------------------------------------------------------------------------|--|

**Name: diphenylhexatriene**

|                                                                                                    |                                                                                                     |  |
|----------------------------------------------------------------------------------------------------|-----------------------------------------------------------------------------------------------------|--|
| 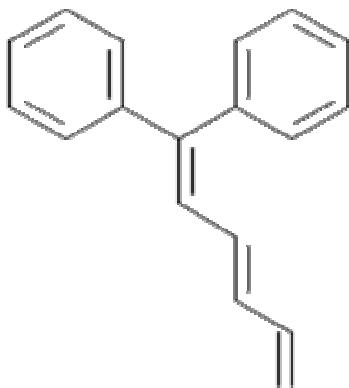 <p>10633626</p> |  <p>21374352</p> |  |
|----------------------------------------------------------------------------------------------------|-----------------------------------------------------------------------------------------------------|--|

**Name: cytosatic**

|                                                                                                  |                                                                                                                   |  |
|--------------------------------------------------------------------------------------------------|-------------------------------------------------------------------------------------------------------------------|--|
| 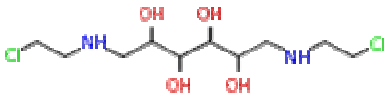 <p>10860</p> | <p>Chiral</p>  <p>2298447</p> |  |
|--------------------------------------------------------------------------------------------------|-------------------------------------------------------------------------------------------------------------------|--|

**Name: strontium**

SrH<sub>2</sub>

4514263

SrH<sub>2</sub>

16787720

**Name: tunicamycin**

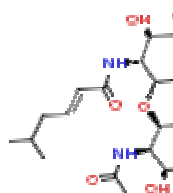

4445282

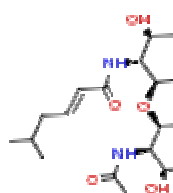

4938690

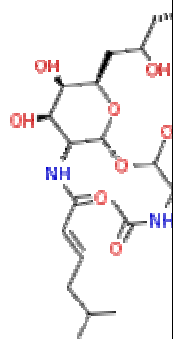

4976209

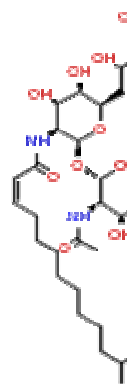

16736076

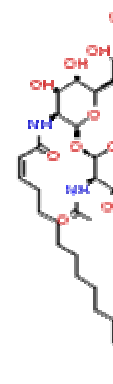

16736079

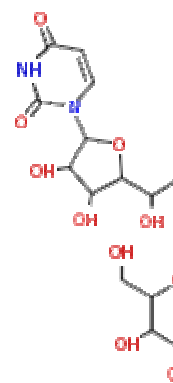

20559189

**Name: vitamin B5**



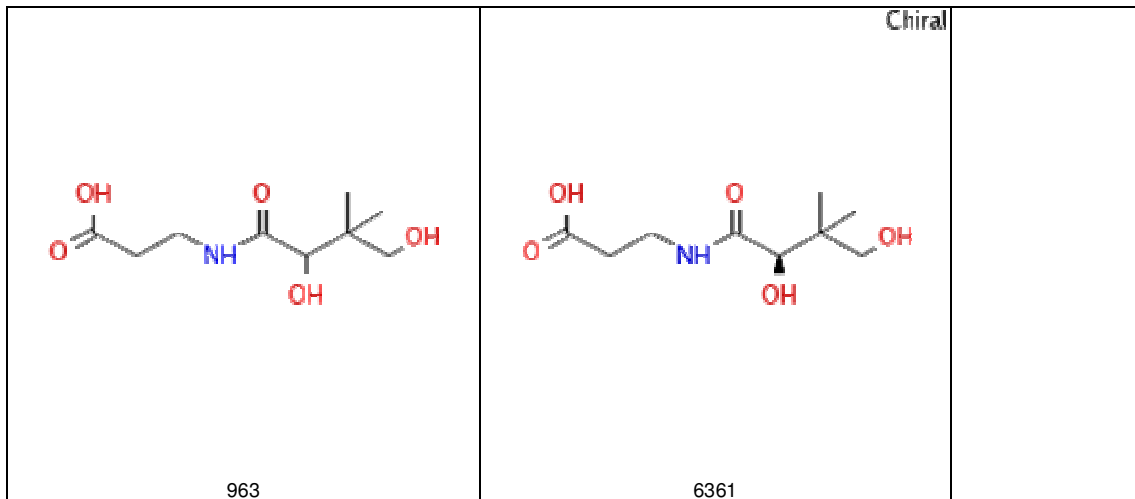

**Name: cystein**

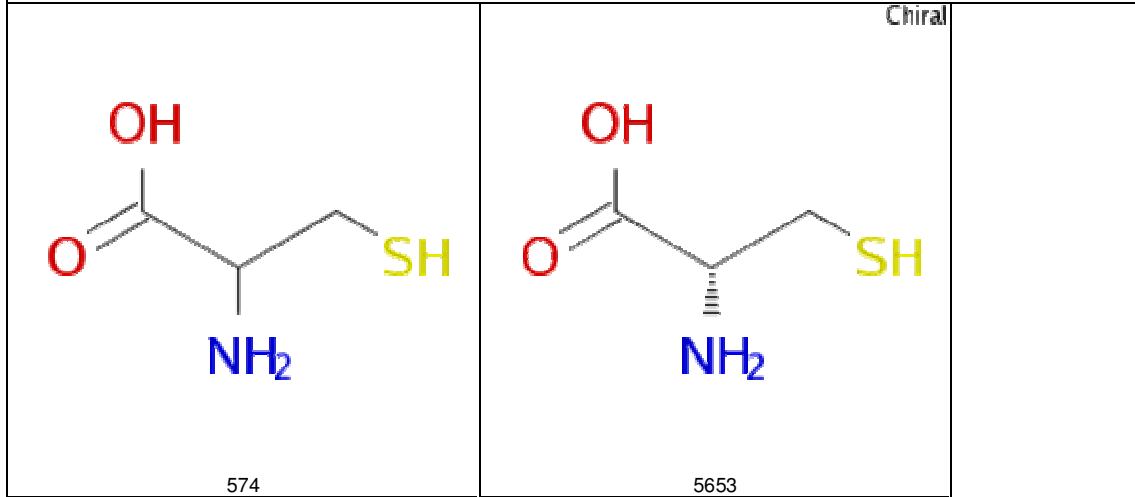

**Name: hygromycin**

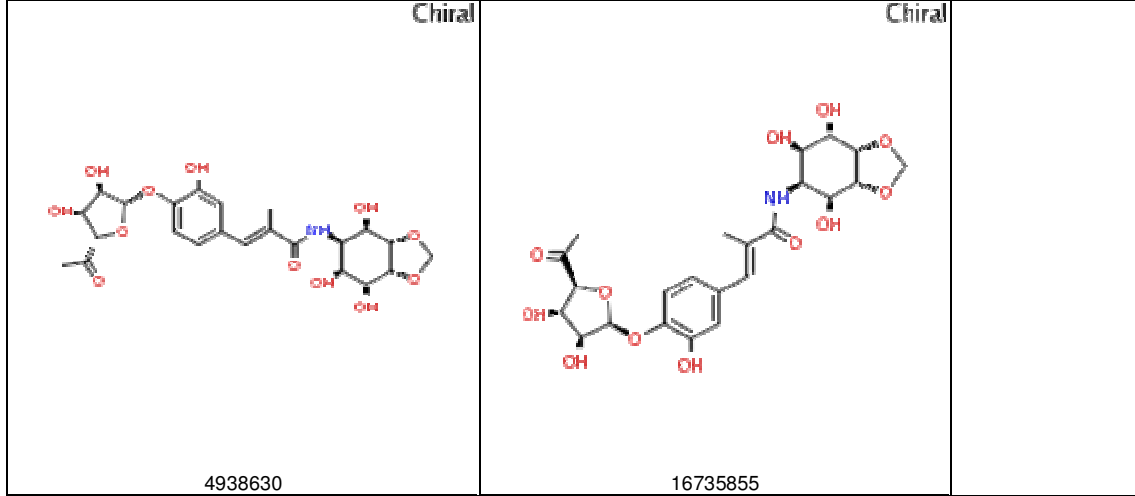

**Name: HP**

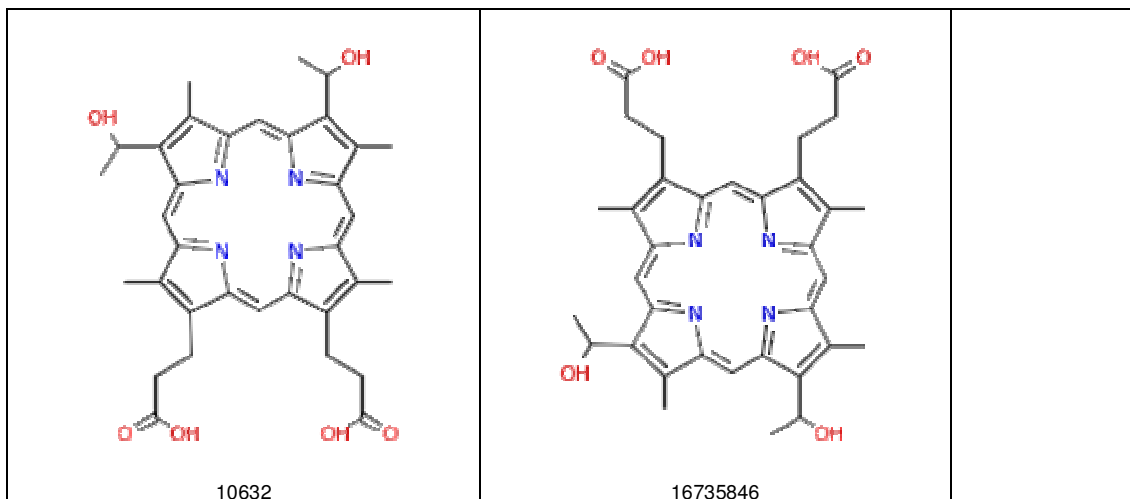

**Name: dicysteine**

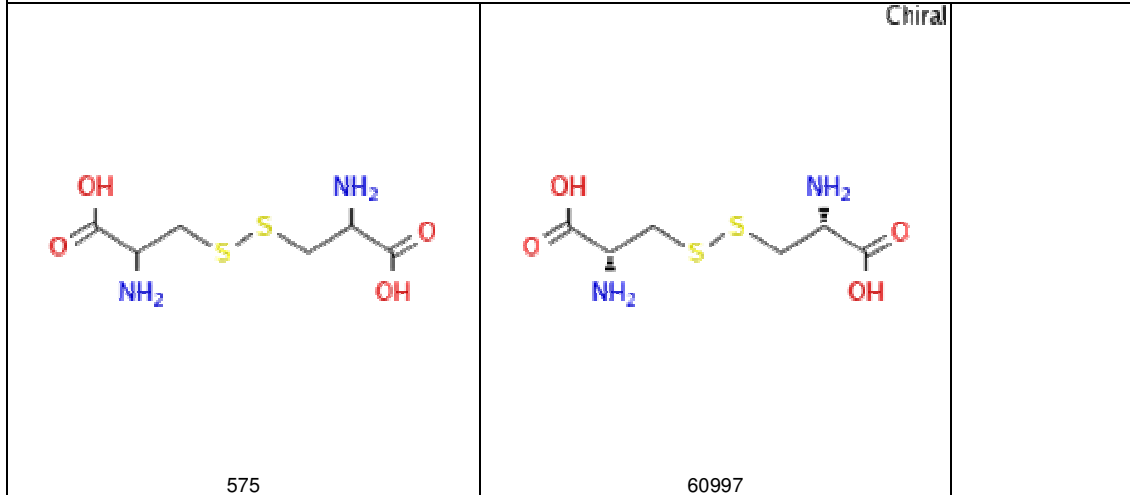

**Name: Gemcitabine**

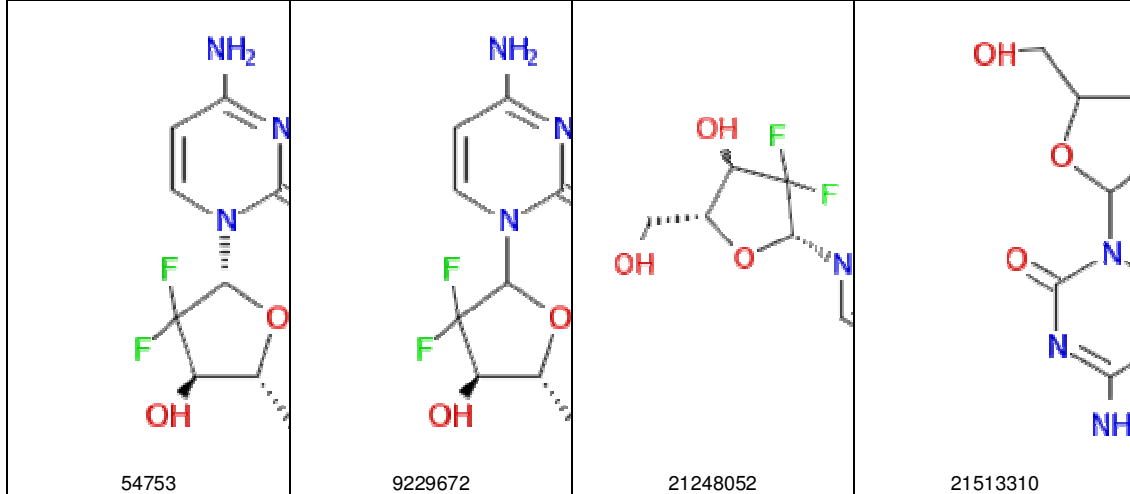

**Name: canavanin**

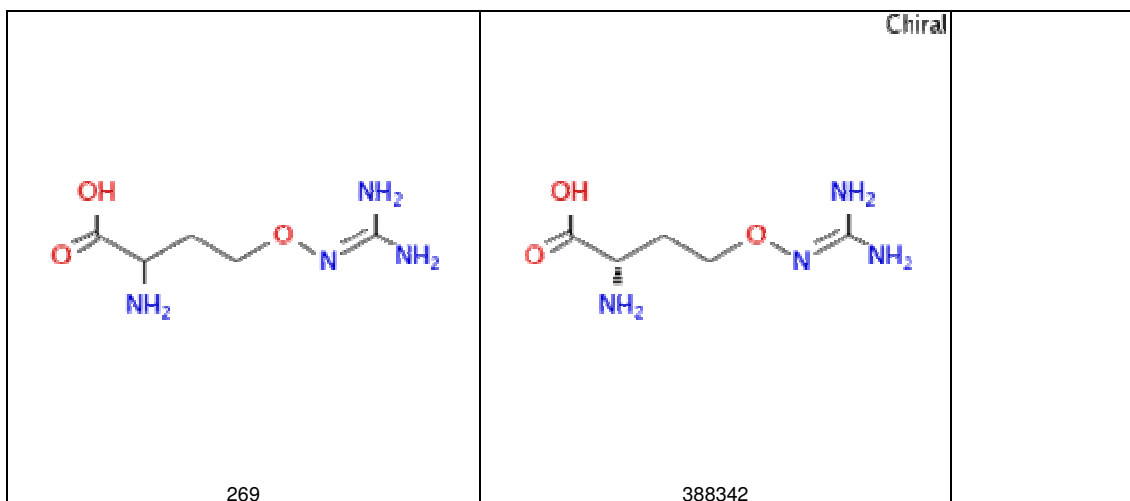

**Name: UDP-D-galactose**

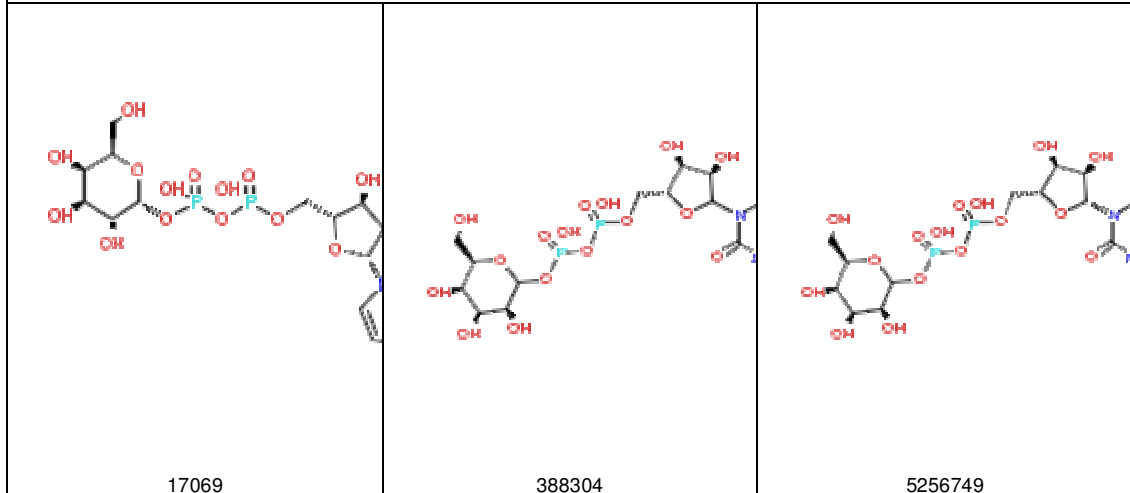

**Name: sordarin**

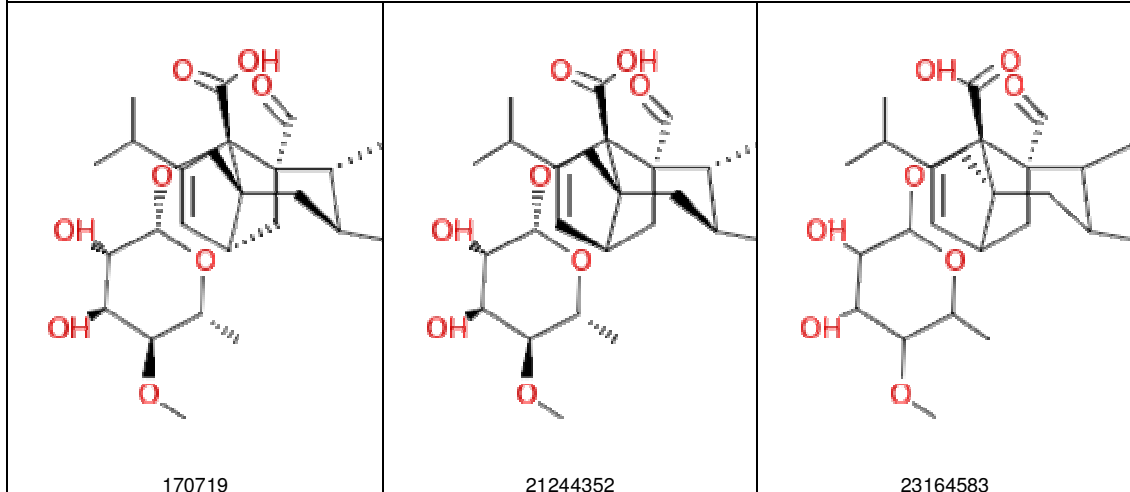

**Name: surfactin**

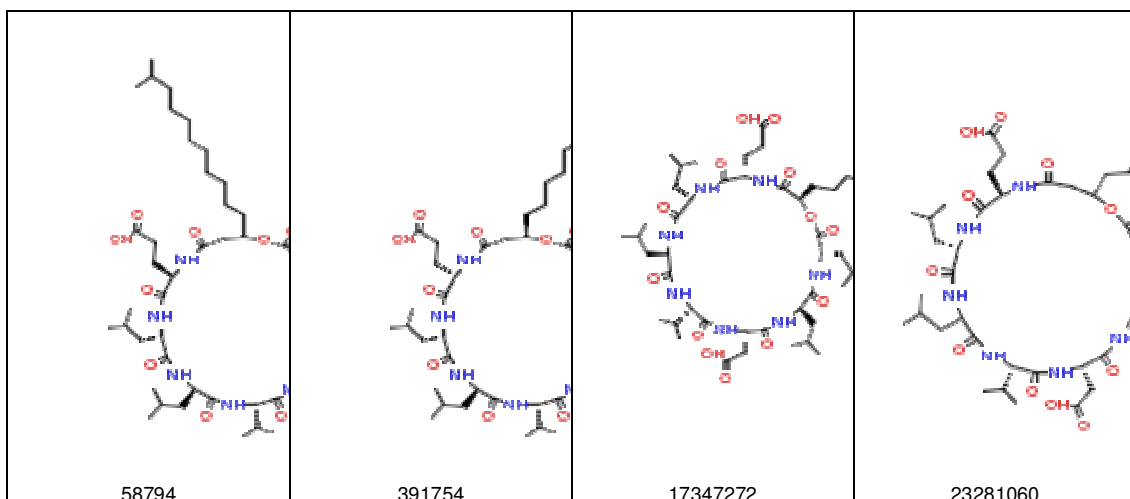

**Name: Fredericamycin A**

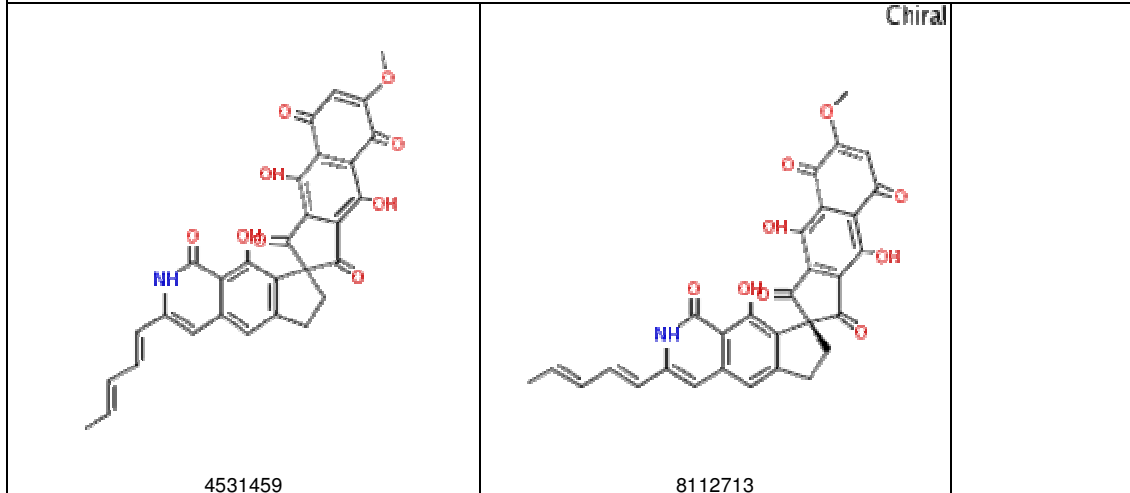

**Name: galactose-6-phosphate**

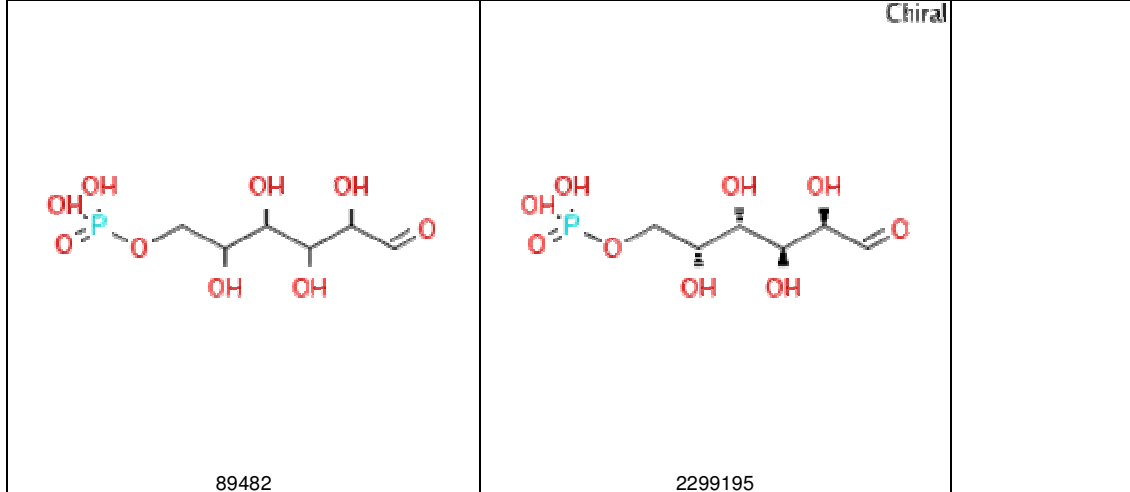

**Name: stilbene**

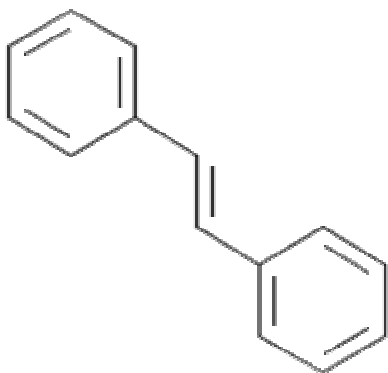

11018

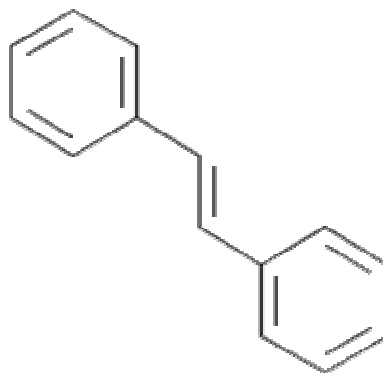

553649

**Name: kresoxim-methyl**

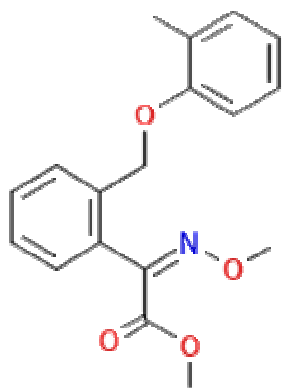

4588320

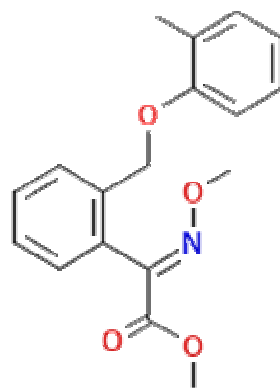

4813314

**Name: 3,4-dihydroxyphenylalanine**

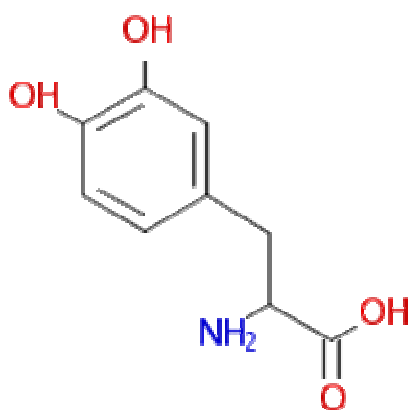

813

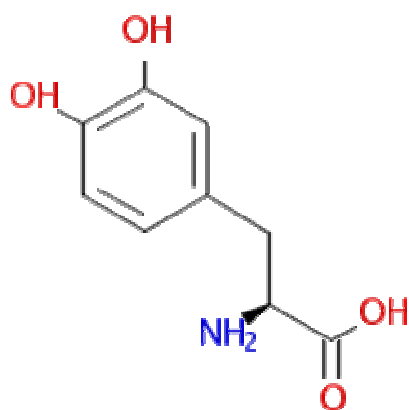

5824

Chiral

**Name: pulegone**

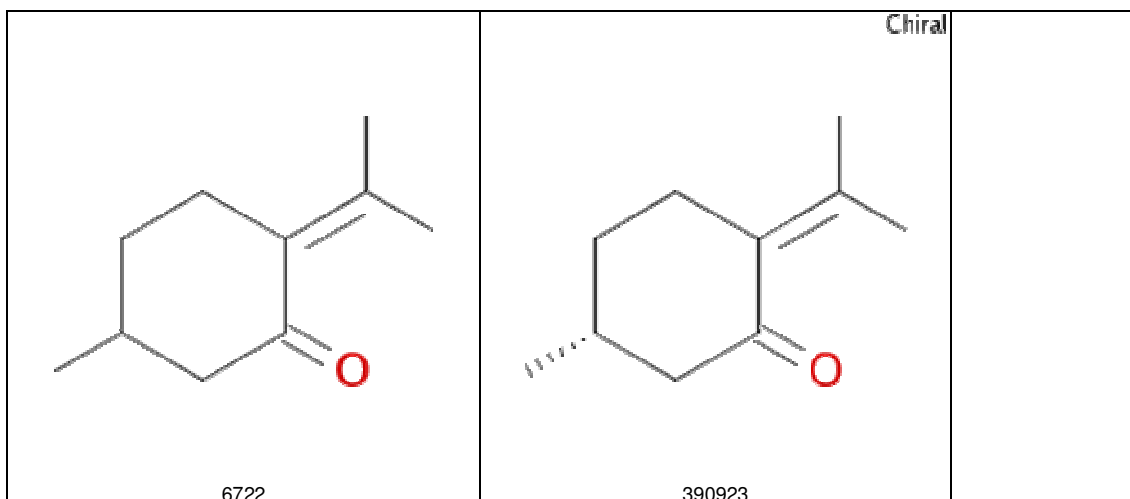

**Name: active Amyl alcohol**

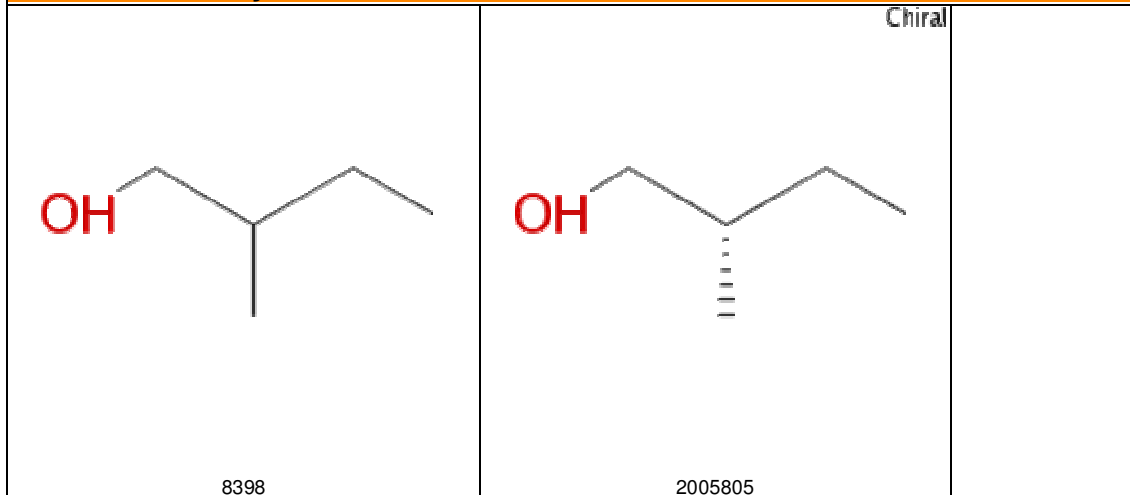

**Name: GSNO**

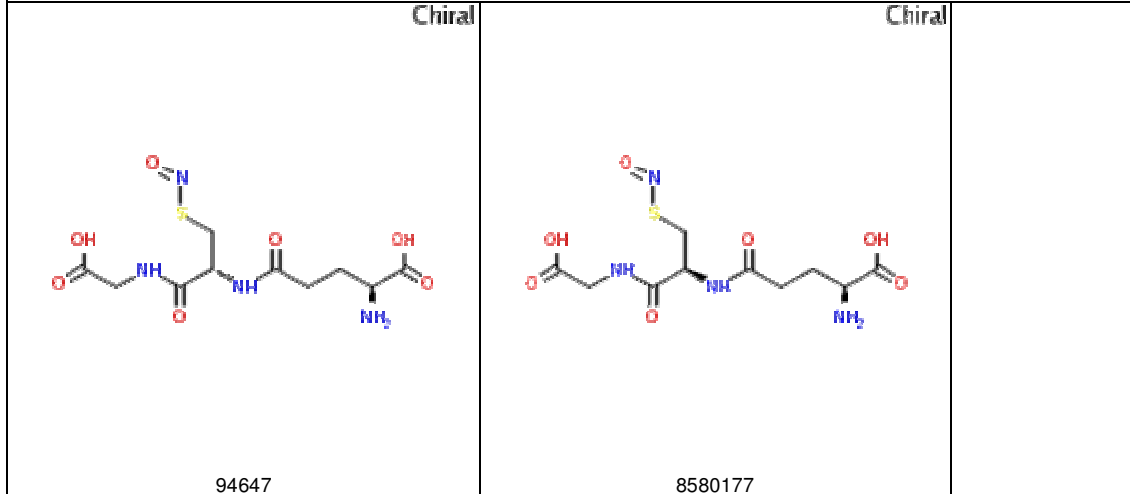

**Name: phalloidine**

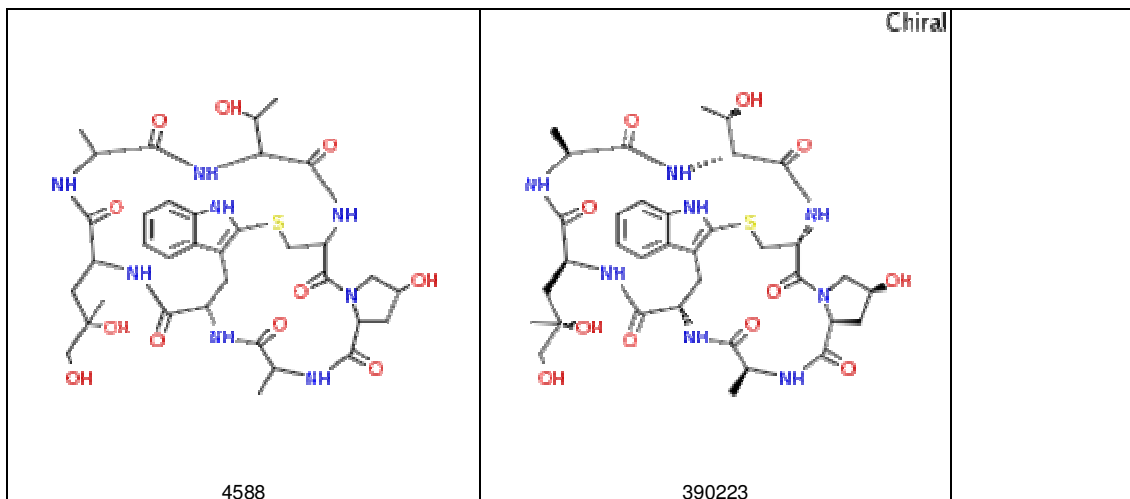

Supplement: 11306_2010_251_MOESM4_ESM.pdf [file 11306_2010_251_MOESM4_ESM.pdf]
